# Supplementary material for: Differential DNA Methylation in Purified Human Blood Cells: Implications for Cell Lineage and Studies on Disease Susceptibility
Source: PLoS One. 2012 Jul 25;7(7):e41361. doi: 10.1371/journal.pone.0041361 (PMC3405143; doi:10.1371/journal.pone.0041361)
Supplement: Table S3 — Differentially methylated probes (n = 1865) in isolated cells from blood in selected susceptibility genes for inflammatory diseases from the catalog of published genome-wide association studies (http://www.genome.gov/gwastudies/) [30]. The included diseases were asthma, atopy, atopic dermatitis, inflammatory bowel disease, rheumatoid arthritis, systemic lupus erythematosus, Type 1 and Type 2 diabetes. (XLSX) [file pone.0041361.s006.xlsx]

## Sheet: Supplementary Table S3
Illumina Target ID	Chromosome (build 36)	Coordinate (build 36)	UCSC REFGENE NAME	UCSC REFGENE ACCESSION	UCSC REFGENE GROUP	RELATION TO UCSC CPG ISLAND	Disease	Whole Blood		PBMC		CD4+ T cells		CD8+ T cells		CD56+ NK cells		CD19+ B cells		CD14+ Monocytes		Granulocytes		Neutrophils		Eosinophils
								Call	M-value	Call	M-value	Call	M-value	Call	M-value	Call	M-value	Call	M-value	Call	M-value	Call	M-value	Call	M-value	Call	M-value
cg19633487	1	2512230	MMEL1;C1orf93	NM_033467;NM_152371	3'UTR;3'UTR	S_Shelf	RA	Methy	5.69608	Unmethy	6.02101	Unmethy	6.14501	Methy	5.42012	Methy	5.60298	Methy	5.70519	Methy	5.7041	Methy	5.86529	Methy	5.81019	Methy	5.91642
cg21209485	1	2519219	MMEL1	NM_033467	Body	S_Shore	RA	Margin	-0.51048	Margin	-0.805625	Margin	-0.289339	Margin	-1.16082	Margin	-0.71002	Margin	-0.758602	Margin	-0.528021	Margin	-0.949538	Methy	2.26537	Margin	-0.312418
cg09105687	1	2526507	MMEL1	NM_033467	Body	N_Shore	RA	Methy	2.33651	Methy	2.0831	Methy	2.08618	Methy	1.72311	Methy	1.93215	Margin	0.319064	Methy	2.34151	Methy	2.33047	Methy	2.63246	Methy	2.69407
cg22489883	1	2527407	MMEL1	NM_033467	Body	N_Shore	RA	Methy	1.25608	Methy	1.3902	Methy	1.18251	Margin	0.863709	Methy	0.992861	Margin	0.972137	Methy	1.47651	Methy	1.46284	Methy	1.58659	Methy	1.64777
cg11707310	1	2527579	MMEL1	NM_033467	Body	Island	RA	Methy	6.66079	Unmethy	6.92878	Unmethy	6.72752	Unmethy	6.51067	Unmethy	6.56073	Methy	6.6752	Methy	6.92171	Methy	6.99627	Unmethy	6.59096	Margin	6.35488
cg24688471	1	2532675	MMEL1	NM_033467	Body	NA	RA	Margin	-1.5274	Margin	-1.62718	Margin	-1.54801	Margin	-1.55696	Margin	-1.65274	Margin	-1.51419	Margin	-1.77664	Margin	-1.6611	Unmethy	-1.88555	Unmethy	-1.90841
cg05838104	1	2549231	MMEL1	NM_033467	Body	N_Shore	RA	Methy	0.97558	Methy	1.27025	Methy	1.04679	Methy	1.17969	Methy	1.21566	Margin	1.07832	Methy	0.878228	Methy	0.90468	Methy	0.950627	Methy	1.02207
cg05874270	1	2549753	MMEL1	NM_033467	Body	Island	RA	Margin	-1.46134	Margin	-1.45973	Margin	-1.55503	Margin	-1.87163	Unmethy	-1.99064	Margin	-1.39542	Margin	-1.47523	Margin	-1.38444	Margin	-1.38875	Margin	-1.3063
cg14510359	1	2549790	MMEL1	NM_033467	Body	Island	RA	Unmethy	-2.27543	Unmethy	-2.03464	Unmethy	-2.09463	Margin	-1.50052	Margin	-1.67363	Margin	-1.18768	Unmethy	-2.81459	Unmethy	-2.70814	Unmethy	-2.78109	Unmethy	-3.07516
cg00980319	1	2550744	MMEL1	NM_033467	Body	Island	RA	Unmethy	-2.31822	Unmethy	-1.88094	Unmethy	-1.88601	Margin	-1.49615	Margin	-1.57149	Unmethy	-2.62687	Unmethy	-2.71471	Unmethy	-2.77297	Unmethy	-2.74256	Unmethy	-2.84173
cg03709938	1	2550810	MMEL1	NM_033467	5'UTR	Island	RA	Unmethy	-2.22634	Unmethy	-2.13375	Unmethy	-1.95556	Margin	-1.85295	Unmethy	-2.16905	Unmethy	-2.21622	Unmethy	-2.7193	Unmethy	-2.69178	Unmethy	-2.72766	Unmethy	-2.70292
cg16022081	1	2554189	MMEL1;MMEL1	NM_033467;NM_033467	1stExon;5'UTR	S_Shelf	RA	Methy	2.02599	Methy	2.00394	Methy	2.07634	Methy	2.03285	Methy	1.99025	Margin	0.879731	Methy	2.30855	Methy	2.13252	Methy	2.3398	Methy	2.2056
cg21162779	1	2554858	MMEL1	NM_033467	TSS1500	S_Shelf	RA	Methy	1.89622	Methy	1.79032	Methy	2.0026	Methy	1.04741	Margin	0.414334	Methy	1.95096	Methy	2.55419	Methy	2.29154	Methy	2.39628	Methy	2.36806
cg04563718	1	2555637	MMEL1	NM_033467	TSS1500	NA	RA	Margin	0.872986	Margin	0.909432	Margin	0.793361	Margin	0.339544	Margin	0.544977	Margin	0.838192	Methy	1.35036	Methy	1.21677	Methy	1.25071	Methy	1.36087
cg17429686	1	2561089	NA	NA	NA	N_Shelf	RA	Methy	0.93915	Margin	0.981877	Methy	1.05706	Margin	0.799149	Margin	0.868391	Margin	0.832529	Methy	1.10605	Methy	0.961167	Methy	1.01633	Methy	1.0087
cg19159961	1	17506121	PADI4	NM_012387	TSS1500	NA	RA	Methy	2.34614	Methy	2.05551	Methy	1.53173	Margin	0.36251	Methy	1.39952	Methy	3.01541	Methy	2.32897	Methy	2.28717	Methy	2.36661	Methy	2.29777
cg23228178	1	17506268	PADI4	NM_012387	TSS1500	NA	RA	Methy	0.940496	Margin	0.457088	Margin	-0.0547933	Margin	-0.581684	Margin	-0.358611	Margin	-0.13352	Methy	1.2408	Methy	1.20056	Methy	1.26786	Methy	1.1595
cg16091981	1	17507130	PADI4	NM_012387	TSS200	NA	RA	Unmethy	-2.23914	Margin	-1.57197	Margin	-0.96453	Margin	-1.96991	Unmethy	-2.57121	Margin	-1.35094	Unmethy	-3.4737	Unmethy	-3.45753	Unmethy	-3.58029	Unmethy	-3.55882
cg26918754	1	17507216	PADI4	NM_012387	TSS200	NA	RA	Margin	-1.53851	Margin	-1.06099	Margin	-0.69719	Margin	-1.1083	Margin	-1.35977	Margin	-0.966861	Unmethy	-2.92429	Unmethy	-2.78052	Unmethy	-2.78917	Unmethy	-2.89393
cg21295838	1	17507300	PADI4;PADI4	NM_012387;NM_012387	1stExon;5'UTR	NA	RA	Margin	-1.64497	Margin	-1.31399	Margin	-0.882145	Margin	-1.47175	Margin	-1.60941	Margin	-1.29258	Unmethy	-2.92341	Unmethy	-2.72497	Unmethy	-2.86161	Unmethy	-3.04133
cg18333690	1	17507303	PADI4;PADI4	NM_012387;NM_012387	1stExon;5'UTR	NA	RA	Margin	-1.19856	Margin	-0.693133	Margin	-0.0804067	Margin	-0.969619	Margin	-1.16216	Margin	-0.532938	Unmethy	-2.67068	Unmethy	-2.49619	Unmethy	-2.73065	Unmethy	-2.81443
cg17785802	1	17535254	PADI4	NM_012387	Body	NA	RA	Unmethy	-2.04335	Unmethy	-1.91351	Unmethy	-1.68977	Margin	-1.89204	Margin	-1.78579	Unmethy	-1.9192	Unmethy	-2.03314	Unmethy	-2.40074	Unmethy	-2.15713	Unmethy	-2.32527
cg14561834	1	17555200	PADI4	NM_012387	Body	NA	RA	Unmethy	-2.07947	Margin	-1.53527	Margin	-1.08312	Margin	-1.86762	Margin	-1.4689	Unmethy	-2.47391	Unmethy	-2.4862	Unmethy	-3.01735	Unmethy	-2.92559	Unmethy	-2.93568
cg07077978	1	38280742	NA	NA	NA	N_Shore	RA	Methy	0.989067	Methy	1.11795	Methy	1.02538	Margin	0.778203	Margin	0.831186	Margin	1.09912	Methy	1.08506	Methy	1.1363	Methy	1.23042	Methy	1.16664
cg25609528	1	38282769	POU3F1;POU3F1	NM_002699;NM_002699	3'UTR;1stExon	Island	RA	Margin	-1.85687	Margin	-1.59019	Margin	-1.53737	Margin	-1.20353	Margin	-1.06996	Margin	-1.71851	Unmethy	-2.0509	Unmethy	-1.9931	Unmethy	-2.04136	Unmethy	-1.85623
cg13193455	1	38284042	POU3F1	NM_002699	1stExon	Island	RA	Unmethy	-2.15046	Unmethy	-2.00181	Unmethy	-2.22939	Margin	-1.59579	Margin	-1.28858	Unmethy	-2.09591	Unmethy	-2.34046	Unmethy	-2.17013	Unmethy	-2.21306	Unmethy	-2.29284
cg18451114	1	38284264	POU3F1	NM_002699	1stExon	Island	RA	Unmethy	-2.97813	Unmethy	-2.8894	Unmethy	-3.52431	Unmethy	-2.29779	Margin	-1.71438	Unmethy	-3.04325	Unmethy	-3.38155	Unmethy	-2.89391	Unmethy	-3.032	Unmethy	-3.00658
cg21270860	1	38285905	POU3F1	NM_002699	TSS1500	Island	RA	Unmethy	-1.96402	Unmethy	-1.80646	Margin	-1.588	Margin	-0.96118	Margin	-1.58723	Unmethy	-2.25471	Unmethy	-2.6884	Unmethy	-2.6128	Unmethy	-2.58074	Unmethy	-2.84412
cg01823958	1	53330043	SLC1A7	NM_006671	Body	N_Shore	SLE	Margin	0.108119	Margin	0.964634	Methy	1.44454	Methy	1.60459	Methy	1.74362	Methy	2.41924	Margin	-0.368396	Margin	-0.494876	Margin	-0.211129	Methy	1.25911
cg14212966	1	53330980	SLC1A7	NM_006671	Body	Island	SLE	Margin	0.817758	Methy	1.21367	Methy	1.49542	Methy	1.36609	Methy	1.28516	Methy	1.26718	Methy	0.988575	Methy	0.741399	Methy	0.933917	Methy	1.00291
cg26060003	1	53331099	SLC1A7	NM_006671	Body	Island	SLE	Margin	0.726705	Methy	1.33796	Methy	1.63526	Methy	1.59397	Methy	1.47685	Methy	1.27046	Methy	0.888617	Margin	0.581717	Margin	0.751591	Methy	0.901414
cg10529401	1	53359634	SLC1A7	NM_006671	Body	NA	SLE	Methy	1.39674	Methy	1.31036	Methy	1.22894	Margin	0.720591	Margin	0.818173	Margin	0.851686	Methy	1.90055	Methy	1.70626	Methy	1.78086	Methy	1.78772
cg08121408	1	53368068	SLC1A7	NM_006671	Body	NA	SLE	Methy	2.68128	Methy	2.41823	Methy	2.24908	Methy	1.82884	Margin	0.814231	Methy	2.30468	Methy	2.99925	Methy	2.78254	Methy	2.94026	Methy	2.9043
cg18046365	1	53380955	SLC1A7	NM_006671	TSS200	NA	SLE	Methy	0.987411	Margin	0.866572	Margin	0.622245	Margin	0.181221	Margin	0.365603	Margin	0.456434	Methy	1.23896	Methy	1.25031	Methy	1.19402	Methy	1.19148
cg07793724	1	53381959	SLC1A7	NM_006671	TSS1500	NA	SLE	Methy	1.29743	Methy	1.65142	Methy	1.87077	Methy	1.79829	Methy	1.84811	Margin	1.0072	Methy	1.39131	Methy	1.12969	Methy	0.935286	Margin	-0.0435002
cg03601886	1	53421806	NA	NA	NA	NA	SLE	Methy	3.31835	Methy	2.78915	Methy	4.28174	Methy	1.27678	Margin	0.191061	Methy	4.68816	Methy	4.5277	Methy	4.19697	Methy	3.97344	Methy	3.211
cg01100796	1	53434628	CPT2	NM_000098	TSS200	N_Shore	SLE	Unmethy	-2.08115	Margin	-1.10452	Margin	-0.967872	Margin	-0.142615	Margin	-0.699274	Margin	-1.54125	Unmethy	-3.524	Unmethy	-3.09805	Unmethy	-3.24127	Unmethy	-3.4326
cg01810926	1	53436569	CPT2	NM_000098	Body	S_Shore	SLE	Margin	0.158947	Methy	1.09101	Methy	1.2823	Methy	1.2566	Methy	1.19095	Methy	1.46664	Margin	0.639395	Margin	-0.497767	Margin	-0.477515	Margin	-0.6379
cg15590153	1	63831111	PGM1	NM_002633	TSS1500	N_Shore	T1D	Margin	0.241227	Methy	1.22048	Methy	2.06747	Methy	2.87919	Methy	1.90836	Margin	0.886682	Unmethy	-2.2617	Unmethy	-2.28022	Unmethy	-2.22584	Unmethy	-2.58809
cg24370698	1	63831202	PGM1	NM_002633	TSS1500	N_Shore	T1D	Margin	-0.789823	Margin	0.619328	Methy	1.29188	Methy	2.54335	Methy	1.17978	Margin	0.238437	Unmethy	-2.66713	Unmethy	-2.96991	Unmethy	-2.10697	Unmethy	-2.9903
cg24585453	1	63831260	PGM1	NM_002633	TSS1500	N_Shore	T1D	Unmethy	-2.19487	Margin	-1.66916	Margin	-1.34717	Margin	-0.838521	Margin	-1.40856	Unmethy	-1.84098	Unmethy	-3.19894	Unmethy	-3.00837	Unmethy	-2.78793	Unmethy	-3.26801
cg07842386	1	67404616	IL23R	NM_144701	TSS200	NA	IBD	Methy	1.72543	Methy	1.09643	Margin	0.537413	Margin	0.144379	Margin	-1.56341	Margin	0.834242	Methy	2.58117	Methy	2.53507	Methy	2.5884	Methy	2.47428
cg27168493	1	67409312	IL23R	NM_144701	Body	NA	IBD	Unmethy	-2.97061	Unmethy	-2.85026	Unmethy	-3.27288	Unmethy	-3.61394	Unmethy	-3.2958	Margin	-0.595906	Unmethy	-3.24957	Unmethy	-3.43706	Unmethy	-3.47588	Unmethy	-3.44254
cg09664314	1	71963194	NEGR1	NM_173808	Body	NA	SLE	Margin	0.300239	Margin	-0.154931	Margin	-0.688258	Margin	-1.96588	Margin	-1.04707	Margin	-0.208154	Methy	0.972326	Margin	0.487479	Margin	0.562647	Margin	0.834191
cg05928873	1	72075558	NEGR1	NM_173808	Body	NA	SLE	Methy	2.47039	Methy	2.15303	Methy	1.55857	Margin	0.911939	Margin	0.927418	Methy	1.33807	Methy	3.24733	Methy	2.71015	Methy	2.62657	Methy	2.58733
cg09256413	1	72339278	NEGR1	NM_173808	Body	NA	SLE	Methy	1.34222	Methy	1.6914	Methy	2.14688	Methy	2.08075	Methy	1.92731	Methy	1.63905	Methy	0.901243	Methy	1.05828	Methy	0.96159	Margin	0.608251
cg04985396	1	72522323	NEGR1	NM_173808	TSS1500	Island	SLE	Unmethy	-2.67976	Unmethy	-2.69849	Unmethy	-2.72761	Margin	-2.01507	Unmethy	-2.21906	Unmethy	-2.46304	Unmethy	-3.10393	Unmethy	-3.06503	Unmethy	-3.22934	Unmethy	-3.30582
cg07110659	1	85085667	LPAR3	NM_012152	Body	NA	T1D	Margin	-1.72314	Margin	-1.24489	Margin	-1.46254	Margin	-1.14013	Margin	-0.631963	Margin	-0.0118339	Unmethy	-2.27691	Unmethy	-2.21896	Unmethy	-2.19689	Unmethy	-2.07989
cg10585586	1	85134708	NA	NA	NA	S_Shelf	T1D	Margin	0.650515	Methy	1.30482	Methy	2.40781	Methy	2.49236	Methy	2.08027	Margin	-0.629465	Margin	0.183059	Margin	0.0960326	Margin	-0.0812326	Margin	-0.171123
cg01580044	1	114102179	PHTF1	NM_006608	Body	N_Shore	T1D	Margin	-1.84489	Margin	-1.05393	Margin	0.0835094	Margin	-0.765928	Unmethy	-2.39711	Unmethy	-2.63933	Unmethy	-3.06613	Unmethy	-2.69065	Unmethy	-3.19075	Unmethy	-3.32853
cg22531889	1	114104125	PHTF1	NM_006608	TSS1500	S_Shore	T1D	Unmethy	-2.7862	Unmethy	-2.40054	Unmethy	-2.03929	Margin	-1.57345	Unmethy	-2.4431	Unmethy	-3.87304	Unmethy	-3.84542	Unmethy	-3.70718	Unmethy	-3.74953	Unmethy	-3.86774
cg16515600	1	114125596	RSBN1	NM_018364	Body	NA	T1D,RA	Margin	-1.05896	Margin	-0.910565	Margin	-1.06431	Margin	-0.874625	Margin	-0.879511	Margin	-0.85803	Margin	-1.55733	Margin	-1.59279	Unmethy	-1.52272	Unmethy	-1.53321
cg20977024	1	114138206	RSBN1	NM_018364	Body	NA	T1D,RA	Methy	1.81044	Methy	1.29232	Methy	2.0024	Margin	0.632749	Margin	-0.365787	Margin	0.516126	Methy	2.45827	Methy	2.37444	Methy	2.59552	Methy	2.60253
cg03469607	1	114157094	RSBN1	NM_018364	TSS1500	S_Shore	T1D,RA	Margin	0.769351	Margin	-0.0121123	Margin	-0.852066	Margin	-1.14821	Margin	-0.810409	Margin	0.407432	Methy	0.840785	Methy	1.0333	Margin	0.874309	Margin	0.349721
cg00642679	1	114157216	RSBN1	NM_018364	TSS1500	S_Shore	T1D,RA	Methy	1.42117	Methy	1.2227	Margin	0.834193	Margin	0.844922	Margin	0.505134	Methy	1.30872	Methy	1.83911	Methy	1.76823	Methy	1.8176	Methy	1.78739
cg07111834	1	114203832	PTPN22;PTPN22	NM_012411;NM_015967	Body;Body	NA	T1D,RA	Margin	-1.52628	Margin	-0.375867	Methy	1.07107	Margin	-0.0678973	Unmethy	-2.46647	Unmethy	-3.11277	Unmethy	-3.04951	Unmethy	-2.65033	Unmethy	-2.72414	Unmethy	-2.95053
cg26035817	1	114216325	PTPN22;PTPN22	NM_012411;NM_015967	TSS1500;TSS1500	NA	T1D,RA	Methy	1.21415	Methy	1.63267	Margin	0.87581	Methy	1.09072	Methy	1.95794	Methy	3.34761	Methy	2.73685	Methy	1.14094	Methy	1.16579	Margin	-0.353183
cg07814932	1	120238613	ADAM30	NM_021794	1stExon	N_Shore	T2D	Margin	0.541403	Methy	2.28923	Methy	3.45411	Methy	3.50502	Methy	3.35025	Methy	3.5699	Methy	1.14023	Margin	-1.04938	Margin	-0.540384	Methy	0.908816
cg26196087	1	120331774	NOTCH2	NM_024408	Body	NA	T2D	Margin	0.756841	Methy	1.12184	Methy	1.15946	Methy	1.40889	Methy	0.990904	Methy	1.54507	Methy	1.15881	Margin	0.338757	Margin	0.154037	Unmethy	-2.31678
cg10104810	1	120413670	NOTCH2;NOTCH2	NM_024408;NM_024408	1stExon;5'UTR	Island	T2D	Margin	-1.79184	Unmethy	-1.7566	Unmethy	-1.74129	Margin	-1.68712	Margin	-1.79721	Unmethy	-1.8638	Margin	-1.70479	Margin	-1.79221	Unmethy	-1.70867	Unmethy	-1.63856
cg05824755	1	120414970	NOTCH2	NM_024408	TSS1500	S_Shore	T2D	Margin	0.809602	Margin	0.549842	Margin	0.31884	Margin	0.108268	Margin	0.271473	Margin	0.4425	Methy	1.02613	Methy	0.945487	Methy	0.934259	Margin	0.756763
cg00011513	1	150751010	LCE5A	NM_178438	3'UTR	N_Shelf	Asthma	Margin	0.797763	Margin	0.693489	Margin	0.545763	Margin	0.0747735	Margin	0.0639114	Margin	0.473934	Methy	1.04033	Methy	1.1904	Methy	1.10645	Methy	1.07533
cg15700437	1	150754468	CRCT1	NM_019060	5'UTR	N_Shore	Asthma	Unmethy	-2.77451	Unmethy	-2.3304	Unmethy	-2.16621	Margin	-1.81815	Unmethy	-2.09539	Margin	-1.62291	Unmethy	-3.52598	Unmethy	-3.51668	Unmethy	-3.59335	Unmethy	-3.70233
cg03606772	1	150754480	CRCT1	NM_019060	5'UTR	N_Shore	Asthma	Margin	-1.68794	Margin	-1.45663	Margin	-1.33498	Margin	-1.34488	Margin	-1.34764	Margin	-1.2338	Unmethy	-2.362	Unmethy	-2.21657	Unmethy	-2.2782	Unmethy	-2.2874
cg23726537	1	150754624	CRCT1	NM_019060	Body	Island	Asthma	Unmethy	-2.14647	Unmethy	-2.01384	Unmethy	-2.05199	Margin	-1.64191	Margin	-1.83491	Margin	-1.46775	Unmethy	-2.63334	Unmethy	-2.52712	Unmethy	-2.47445	Unmethy	-2.55488
cg01864564	1	150754893	CRCT1	NM_019060	3'UTR	Island	Asthma	Unmethy	-2.20245	Unmethy	-2.2207	Unmethy	-2.30018	Unmethy	-2.2455	Unmethy	-2.21817	Margin	-0.899675	Unmethy	-2.09238	Unmethy	-2.05127	Unmethy	-2.07171	Unmethy	-2.24509
cg22723818	1	150754992	CRCT1	NM_019060	3'UTR	S_Shore	Asthma	Methy	1.03264	Methy	1.30324	Methy	1.4343	Methy	1.58258	Methy	1.60733	Methy	1.38973	Methy	0.808208	Methy	0.725715	Margin	0.767045	Margin	0.721377
cg23724738	1	150805004	LCE3E	NM_178435	3'UTR	NA	Asthma	Methy	1.86529	Methy	1.81006	Methy	1.51155	Methy	1.14196	Methy	1.54682	Margin	0.212959	Methy	2.19388	Methy	2.27519	Methy	2.36221	Methy	2.37904
cg07476201	1	150805050	LCE3E	NM_178435	Body	NA	Asthma	Margin	0.584616	Margin	0.337106	Margin	0.139888	Margin	-0.148388	Margin	0.0627661	Margin	-0.326187	Methy	0.763558	Methy	0.832373	Methy	1.03558	Methy	1.08448
cg11177526	1	157167008	PYHIN1;PYHIN1;PYHIN1;PYHIN1	NM_198930;NM_198929;NM_152501;NM_198928	TSS1500;TSS1500;TSS1500;TSS1500	NA	Asthma	Margin	0.761232	Margin	0.159853	Margin	-0.732293	Margin	-0.420088	Margin	-1.58327	Margin	0.13919	Methy	1.37148	Methy	1.25887	Methy	1.23596	Methy	1.3343
cg26246880	1	157167173	PYHIN1;PYHIN1;PYHIN1;PYHIN1	NM_198930;NM_198929;NM_152501;NM_198928	TSS1500;TSS1500;TSS1500;TSS1500	NA	Asthma	Margin	0.187127	Margin	-0.386559	Margin	-1.07595	Margin	-1.16602	Unmethy	-2.25273	Margin	-0.468708	Margin	0.514833	Margin	0.581389	Margin	0.383212	Margin	0.605694
cg15036529	1	157167268	PYHIN1;PYHIN1;PYHIN1;PYHIN1	NM_198930;NM_198929;NM_152501;NM_198928	TSS1500;TSS1500;TSS1500;TSS1500	NA	Asthma	Methy	2.19496	Methy	1.45816	Margin	0.840032	Margin	0.317068	Margin	-1.35671	Methy	1.76403	Methy	3.55192	Methy	3.07677	Methy	3.18442	Methy	3.31151
cg19884600	1	157168562	PYHIN1;PYHIN1;PYHIN1;PYHIN1	NM_198930;NM_198928;NM_198929;NM_152501	5'UTR;5'UTR;5'UTR;5'UTR	NA	Asthma	Methy	3.06663	Methy	2.71242	Methy	2.54107	Methy	1.22305	Margin	0.489248	Methy	3.48311	Methy	3.78357	Methy	3.43527	Methy	3.74614	Methy	3.70771
cg00112929	1	157172103	PYHIN1;PYHIN1;PYHIN1;PYHIN1	NM_198930;NM_198928;NM_198929;NM_152501	5'UTR;5'UTR;5'UTR;5'UTR	NA	Asthma	Methy	2.79104	Methy	2.439	Methy	2.43721	Methy	1.32925	Margin	0.875237	Methy	3.47161	Methy	3.07008	Methy	3.18817	Methy	3.16753	Methy	3.5259
cg11237207	1	157178001	PYHIN1;PYHIN1;PYHIN1;PYHIN1	NM_198930;NM_198929;NM_152501;NM_198928	Body;Body;Body;Body	NA	Asthma	Methy	2.79941	Methy	2.29277	Methy	3.019	Methy	0.957394	Margin	-0.444561	Methy	2.764	Methy	3.85512	Methy	2.98853	Methy	3.29962	Methy	3.179
cg15518113	1	165666745	CD247;CD247	NM_000734;NM_198053	3'UTR;3'UTR	NA	RA	Methy	2.66803	Methy	2.05639	Methy	3.41746	Methy	1.3385	Margin	-0.759394	Margin	-0.308919	Methy	3.83313	Methy	3.73533	Methy	3.83982	Methy	4.08917
cg21161394	1	165675333	CD247;CD247	NM_198053;NM_000734	Body;Body	Island	RA	Margin	-1.3741	Margin	-0.864117	Margin	-0.460984	Margin	-0.124271	Margin	-0.255175	Unmethy	-4.37134	Unmethy	-3.77678	Unmethy	-2.87661	Unmethy	-3.79714	Unmethy	-4.47874
cg02648847	1	165675359	CD247;CD247	NM_198053;NM_000734	Body;Body	Island	RA	Margin	-1.19787	Margin	-0.432557	Margin	0.553423	Margin	0.365901	Margin	0.289571	Unmethy	-3.27214	Unmethy	-2.79467	Unmethy	-2.43189	Unmethy	-2.54137	Unmethy	-2.99345
cg12446199	1	165675465	CD247;CD247	NM_198053;NM_000734	Body;Body	Island	RA	Margin	-1.60179	Margin	-0.894305	Margin	-0.0185609	Margin	0.331748	Margin	-0.0969843	Unmethy	-4.87955	Unmethy	-4.7117	Unmethy	-3.95096	Unmethy	-4.75682	Unmethy	-5.39626
cg06900257	1	165675678	CD247;CD247	NM_198053;NM_000734	Body;Body	Island	RA	Margin	-1.36186	Margin	-0.838708	Margin	-0.664823	Margin	-0.140119	Margin	-0.278059	Unmethy	-1.91114	Unmethy	-2.09033	Margin	-1.8257	Unmethy	-2.03491	Unmethy	-2.1257
cg12184421	1	165675760	CD247;CD247	NM_198053;NM_000734	Body;Body	Island	RA	Margin	0.91491	Methy	1.47992	Methy	2.17082	Methy	2.97291	Methy	1.52	Methy	1.2759	Margin	0.527785	Margin	0.543471	Margin	0.375672	Margin	0.475941
cg11958495	1	165675822	CD247;CD247	NM_198053;NM_000734	Body;Body	S_Shore	RA	Margin	-0.243465	Margin	0.161546	Margin	0.58471	Methy	1.38689	Margin	0.185542	Margin	-0.317068	Margin	-0.631286	Margin	-0.540451	Margin	-0.541298	Margin	-0.61079
cg10375409	1	165688330	CD247;CD247	NM_198053;NM_000734	Body;Body	N_Shelf	RA	Methy	1.06279	Margin	0.66381	Margin	0.127426	Methy	0.927819	Margin	-0.365741	Methy	2.13148	Methy	1.92359	Methy	1.37171	Methy	1.51413	Methy	1.32835
cg12480903	1	165690589	CD247;CD247	NM_198053;NM_000734	Body;Body	N_Shore	RA	Margin	-1.51982	Margin	-0.841755	Margin	-1.2786	Margin	0.44544	Margin	-1.01986	Margin	-1.08751	Unmethy	-2.10266	Unmethy	-2.01353	Unmethy	-2.01201	Unmethy	-2.08298
cg18858739	1	165692902	CD247;CD247	NM_198053;NM_000734	Body;Body	S_Shore	RA	Methy	1.7533	Methy	1.23774	Margin	0.518121	Margin	0.705247	Margin	0.244138	Methy	3.01535	Methy	2.56017	Methy	2.36601	Methy	2.66567	Methy	2.64532
cg23114435	1	165709236	CD247;CD247	NM_198053;NM_000734	Body;Body	NA	RA	Margin	0.441993	Margin	-0.257164	Unmethy	-1.7422	Margin	-1.89596	Margin	-1.50199	Methy	1.23038	Methy	2.12081	Methy	1.76493	Methy	1.97747	Methy	2.25561
cg03727968	1	165718454	CD247;CD247	NM_198053;NM_000734	Body;Body	NA	RA	Methy	1.23644	Margin	0.376531	Unmethy	-1.65072	Margin	-1.2093	Margin	-0.907295	Methy	2.98247	Methy	2.59425	Methy	2.46299	Methy	2.71077	Methy	2.92823
cg24929556	1	165721500	CD247;CD247	NM_198053;NM_000734	Body;Body	NA	RA	Methy	1.90103	Methy	1.41263	Margin	0.739732	Methy	1.75375	Margin	0.0923698	Methy	2.80781	Methy	2.79691	Methy	2.60545	Methy	2.73263	Methy	2.78754
cg13210595	1	165737888	CD247;CD247	NM_198053;NM_000734	Body;Body	NA	RA	Methy	2.11115	Margin	0.407921	Unmethy	-2.48778	Margin	-0.441337	Margin	-1.49836	Methy	2.07426	Methy	4.42239	Methy	3.82639	Methy	4.13558	Methy	4.17
cg09473725	1	165752497	CD247;CD247	NM_198053;NM_000734	Body;Body	NA	RA	Methy	1.42326	Margin	0.240776	Unmethy	-2.02961	Unmethy	-3.20764	Margin	-1.70332	Methy	2.63582	Methy	2.58227	Methy	2.22785	Methy	2.29297	Methy	1.67577
cg14278300	1	165753602	CD247;CD247	NM_198053;NM_000734	Body;Body	NA	RA	Methy	1.11599	Margin	0.63683	Margin	-1.21199	Unmethy	-2.91856	Margin	-0.957093	Methy	2.91732	Methy	2.55824	Methy	2.49407	Methy	2.80373	Methy	2.86976
cg09032544	1	165753919	CD247;CD247	NM_198053;NM_000734	Body;Body	NA	RA	Margin	0.647416	Margin	0.113004	Margin	-1.60158	Unmethy	-4.52653	Margin	-0.972014	Methy	4.60571	Methy	4.37954	Methy	2.93862	Methy	4.35963	Methy	5.69631
cg05799811	1	165754020	CD247;CD247	NM_198053;NM_000734	Body;Body	NA	RA	Margin	0.713913	Margin	-0.441489	Unmethy	-2.88307	Unmethy	-4.72467	Unmethy	-2.41833	Methy	2.31266	Methy	2.30529	Methy	2.05691	Methy	2.17127	Methy	2.44057
cg07786657	1	165754257	CD247;CD247	NM_198053;NM_000734	Body;Body	NA	RA	Margin	0.435591	Margin	-0.194768	Unmethy	-2.10833	Unmethy	-4.82863	Margin	-1.60631	Methy	4.01944	Methy	3.90816	Methy	2.59455	Methy	3.91986	Methy	4.54012
cg09554443	1	165754386	CD247;CD247;CD247;CD247	NM_000734;NM_198053;NM_198053;NM_000734	1stExon;5'UTR;1stExon;5'UTR	NA	RA	Margin	-0.340537	Margin	-0.894432	Unmethy	-2.35687	Unmethy	-3.64809	Unmethy	-2.46067	Margin	-1.02024	Margin	-0.0030333	Margin	-0.101645	Margin	-0.0207054	Margin	0.154933
cg19762811	1	165755856	CD247;CD247	NM_000734;NM_198053	TSS1500;TSS1500	NA	RA	Methy	1.23662	Methy	1.22307	Methy	1.19112	Methy	1.10905	Methy	1.21281	Margin	1.0639	Methy	1.02358	Methy	1.05915	Methy	1.08466	Methy	1.093
cg24633390	1	171426369	TNFSF4	NM_003326	Body	NA	SLE	Margin	0.742326	Methy	1.33925	Methy	2.19535	Methy	2.36795	Methy	1.374	Methy	1.19578	Margin	0.082881	Margin	0.0609198	Margin	-0.0551311	Margin	-0.659787
cg21876925	1	171441951	TNFSF4	NM_003326	Body	NA	SLE	Margin	-1.352	Margin	-0.577804	Margin	-0.126541	Margin	0.075403	Margin	-0.0420998	Margin	-0.956707	Unmethy	-2.78613	Unmethy	-2.55217	Unmethy	-2.65707	Unmethy	-2.96232
cg16517394	1	171442985	TNFSF4;TNFSF4	NM_003326;NM_003326	5'UTR;1stExon	NA	SLE	Unmethy	-2.45983	Unmethy	-2.00778	Unmethy	-2.1416	Margin	-1.58781	Margin	-1.35225	Unmethy	-1.85766	Unmethy	-3.41888	Unmethy	-3.24793	Unmethy	-3.26446	Unmethy	-3.37159
cg21439763	1	171442989	TNFSF4;TNFSF4	NM_003326;NM_003326	5'UTR;1stExon	NA	SLE	Margin	-1.89431	Margin	-1.03384	Margin	-0.818365	Margin	-0.184845	Margin	-0.0526799	Margin	-1.01848	Unmethy	-3.90395	Unmethy	-3.42046	Unmethy	-3.40903	Unmethy	-4.06401
cg10861599	1	171443146	TNFSF4	NM_003326	TSS200	NA	SLE	Unmethy	-2.74758	Unmethy	-2.16083	Unmethy	-2.3415	Margin	-2.0384	Margin	-0.924821	Unmethy	-1.87754	Unmethy	-3.34512	Unmethy	-3.33777	Unmethy	-3.10069	Unmethy	-3.24312
cg12552165	1	181421604	LAMC2;LAMC2	NM_018891;NM_005562	TSS200;TSS200	NA	SLE	Margin	0.793037	Methy	1.24869	Methy	1.68923	Methy	1.99845	Methy	1.24675	Margin	1.06334	Margin	0.473336	Margin	0.535675	Margin	0.588133	Margin	0.4751
cg24146518	1	181421720	LAMC2;LAMC2	NM_018891;NM_005562	TSS200;TSS200	NA	SLE	Unmethy	-2.2552	Unmethy	-2.12514	Unmethy	-2.15492	Margin	-1.84633	Unmethy	-2.11315	Unmethy	-2.01922	Unmethy	-2.76307	Unmethy	-2.81306	Unmethy	-2.62401	Unmethy	-2.68505
cg01949993	1	181421739	LAMC2;LAMC2	NM_018891;NM_005562	TSS200;TSS200	NA	SLE	Unmethy	-2.55458	Unmethy	-2.15244	Unmethy	-1.79607	Margin	-1.11636	Unmethy	-1.98617	Margin	-1.57697	Unmethy	-3.18321	Unmethy	-2.96337	Unmethy	-2.94691	Unmethy	-3.25989
cg05929019	1	181421777	LAMC2;LAMC2	NM_018891;NM_005562	TSS200;TSS200	NA	SLE	Unmethy	-2.88573	Unmethy	-2.61686	Unmethy	-2.15449	Margin	-1.7288	Unmethy	-2.37593	Unmethy	-2.20856	Unmethy	-3.74451	Unmethy	-3.62474	Unmethy	-3.96244	Unmethy	-3.84392
cg06211724	1	181422060	LAMC2;LAMC2;LAMC2;LAMC2	NM_018891;NM_018891;NM_005562;NM_005562	1stExon;5'UTR;5'UTR;1stExon	NA	SLE	Unmethy	-2.64016	Unmethy	-2.72203	Unmethy	-2.2721	Margin	-1.62572	Unmethy	-2.29171	Unmethy	-2.03893	Unmethy	-3.10284	Unmethy	-3.32693	Unmethy	-3.28653	Unmethy	-3.48743
cg22346461	1	181422196	LAMC2;LAMC2	NM_005562;NM_018891	Body;Body	NA	SLE	Unmethy	-2.05827	Unmethy	-1.74071	Unmethy	-1.69694	Margin	-1.83259	Margin	-1.58615	Margin	-1.59466	Unmethy	-2.40148	Unmethy	-2.37094	Unmethy	-2.42117	Unmethy	-2.34643
cg00696930	1	181431035	LAMC2;LAMC2	NM_005562;NM_018891	Body;Body	NA	SLE	Margin	0.527461	Margin	-0.0864091	Unmethy	-2.07131	Unmethy	-3.04032	Margin	-1.00376	Margin	-0.0911495	Methy	1.07401	Methy	1.00981	Methy	1.1565	Methy	1.27673
cg01258789	1	195503880	CRB1	NM_201253	TSS200	NA	Asthma	Methy	1.41656	Margin	0.984737	Margin	0.905287	Margin	0.550279	Margin	0.771322	Margin	0.87929	Methy	1.01911	Methy	1.29372	Methy	1.3697	Methy	1.25461
cg13968233	1	195831081	DENND1B;DENND1B	NM_001142795;NM_144977	Body;Body	NA	Asthma	Methy	3.46679	Methy	3.57518	Methy	3.72139	Methy	3.47296	Methy	2.85155	Methy	3.89655	Methy	3.6546	Methy	3.13026	Methy	2.54496	Margin	0.741167
cg17112757	1	195971460	DENND1B;DENND1B	NM_001142795;NM_144977	Body;Body	NA	Asthma	Methy	5.41476	Unmethy	6.117	Margin	5.99819	Methy	5.36492	Margin	5.8034	Methy	5.58926	Methy	5.44203	Methy	5.51592	Methy	5.83982	Methy	5.71515
cg24461171	1	196011648	DENND1B;DENND1B	NM_144977;NM_001142795	TSS1500;TSS1500	S_Shore	Asthma	Margin	-0.70449	Margin	-0.0134711	Margin	0.532142	Margin	0.0698894	Margin	-0.237194	Methy	1.1949	Unmethy	-2.01751	Margin	-1.50246	Margin	-1.12447	Margin	-0.687679
cg21534578	1	196011782	DENND1B;DENND1B	NM_144977;NM_001142795	TSS1500;TSS1500	S_Shore	Asthma	Margin	0.412289	Margin	0.0803695	Margin	-0.440606	Margin	-0.942612	Margin	-0.528953	Margin	0.488559	Methy	0.863443	Methy	0.805041	Margin	0.756243	Margin	0.283361
cg17611742	1	196011861	DENND1B;DENND1B	NM_144977;NM_001142795	TSS1500;TSS1500	S_Shore	Asthma	Margin	-0.731281	Margin	-1.26715	Unmethy	-2.4207	Unmethy	-3.52814	Unmethy	-2.3497	Margin	-0.623222	Margin	-0.401454	Margin	-0.482916	Margin	-0.512942	Margin	-1.2132
cg22341908	1	196014507	NA	NA	NA	S_Shelf	Asthma	Margin	-1.78478	Margin	-1.69983	Margin	-1.27821	Margin	-1.18942	Margin	-1.90021	Unmethy	-2.22501	Unmethy	-2.97427	Unmethy	-2.23125	Unmethy	-2.20016	Unmethy	-2.52841
cg15490070	1	201414755	CHI3L1	NM_001276	3'UTR	NA	Asthma	Margin	-0.151848	Margin	0.6499	Methy	1.89181	Methy	2.27526	Methy	1.56681	Margin	-0.215979	Unmethy	-2.00869	Margin	-0.741114	Margin	-0.737857	Margin	-0.666396
cg20707774	1	201416451	CHI3L1	NM_001276	Body	NA	Asthma	Methy	1.93336	Methy	2.22719	Methy	1.99509	Methy	2.47447	Methy	2.4655	Margin	1.09469	Methy	2.64888	Methy	1.8847	Methy	2.01058	Methy	2.12743
cg14085262	1	201422561	CHI3L1	NM_001276	TSS200	NA	Asthma	Margin	-1.44929	Margin	-0.669803	Margin	-0.306721	Margin	-0.607148	Margin	-0.577164	Margin	-0.15405	Margin	-1.70245	Unmethy	-3.30119	Unmethy	-2.60949	Margin	-1.50435
cg17014757	1	201422720	CHI3L1	NM_001276	TSS200	NA	Asthma	Margin	-1.34599	Margin	-0.450287	Margin	-0.10597	Margin	0.00394333	Margin	-0.285653	Margin	-0.0957254	Margin	-0.822751	Unmethy	-2.08621	Margin	-1.02173	Margin	-0.740848
cg07423149	1	201422869	CHI3L1	NM_001276	TSS1500	NA	Asthma	Margin	-0.230349	Margin	0.806993	Methy	1.60324	Methy	1.68494	Methy	1.07628	Margin	1.00939	Margin	-0.310557	Margin	-1.32308	Margin	-0.716654	Margin	0.187311
cg02097014	1	201422997	CHI3L1	NM_001276	TSS1500	NA	Asthma	Margin	-1.7049	Margin	-1.25805	Margin	-0.814991	Margin	-1.15315	Margin	-1.19106	Margin	-1.10108	Unmethy	-1.99877	Unmethy	-2.71343	Unmethy	-2.44549	Unmethy	-1.70682
cg19081101	1	201423248	CHI3L1	NM_001276	TSS1500	NA	Asthma	Margin	0.0397191	Methy	2.23872	Methy	3.6155	Methy	3.55015	Methy	2.83322	Methy	3.89369	Margin	-0.0113097	Unmethy	-2.76233	Unmethy	-1.7123	Methy	1.85569
cg22848646	1	201438122	NA	NA	NA	NA	Asthma	Margin	-0.309726	Margin	0.792394	Methy	2.20589	Methy	1.93065	Methy	1.3891	Methy	2.39528	Margin	-1.73433	Margin	-1.90598	Margin	-0.926863	Methy	1.45265
cg21264521	1	201451546	NA	NA	NA	NA	Asthma	Methy	1.08087	Methy	1.07002	Margin	0.969872	Margin	0.501046	Methy	1.27214	Methy	1.65118	Methy	1.61021	Methy	1.17173	Methy	1.34692	Methy	1.84577
cg23683497	1	201459140	CHIT1	NM_003465	Body	NA	Asthma	Methy	1.59356	Methy	1.19044	Margin	0.812581	Margin	0.106784	Margin	0.130176	Margin	0.716141	Methy	2.08621	Methy	2.50872	Methy	2.5378	Methy	2.02132
cg25705508	1	201465646	CHIT1	NM_003465	TSS200	NA	Asthma	Margin	-0.139936	Methy	1.32387	Methy	1.97131	Methy	1.54352	Methy	1.23774	Methy	2.18138	Methy	0.812569	Margin	-1.51648	Margin	-0.704417	Methy	1.60584
cg14789529	1	205008087	IL10	NM_000572	3'UTR	NA	T1D/Asthma	Methy	2.69354	Methy	1.85195	Methy	2.86094	Methy	2.18587	Margin	0.977929	Methy	1.71832	Methy	0.705157	Methy	3.11424	Methy	3.31463	Methy	3.37725
cg10978799	1	205012547	IL10	NM_000572	TSS200	NA	T1D/Asthma	Margin	-1.31034	Margin	-0.51997	Margin	0.652018	Margin	-1.17998	Margin	-0.554853	Margin	-1.63853	Unmethy	-2.49258	Unmethy	-2.11913	Unmethy	-2.48829	Unmethy	-2.57456
cg17744604	1	205012789	IL10	NM_000572	TSS1500	NA	T1D/Asthma	Margin	-0.512932	Margin	0.582424	Methy	2.38603	Methy	1.5155	Methy	1.39187	Unmethy	-1.94038	Unmethy	-3.36179	Unmethy	-2.52631	Unmethy	-2.65411	Unmethy	-2.78092
cg14180511	1	205012810	IL10	NM_000572	TSS1500	NA	T1D/Asthma	Margin	-0.391571	Margin	0.617286	Methy	2.37748	Methy	1.96804	Methy	1.77823	Margin	-1.27772	Unmethy	-2.9721	Margin	-1.83636	Unmethy	-2.08997	Unmethy	-1.92238
cg05508558	1	205693995	CR2;CR2	NM_001006658;NM_001877	TSS1500;TSS1500	N_Shore	T2D	Margin	-0.325909	Margin	-0.66427	Margin	-0.791341	Unmethy	-2.26505	Margin	-0.890624	Unmethy	-2.93735	Margin	-0.112673	Margin	-0.156163	Margin	-0.086669	Margin	-0.222413
cg23810846	1	205695006	CR2;CR2	NM_001006658;NM_001877	Body;Body	S_Shore	T2D	Margin	-1.22621	Margin	-0.975416	Margin	-1.25287	Margin	-1.26566	Margin	-0.839193	Unmethy	-2.14146	Margin	-1.15077	Margin	-1.1756	Margin	-1.20757	Margin	-1.20554
cg07223106	1	231222542	PCNXL2	NM_014801	Body	NA	T2D	Margin	-0.00395302	Methy	1.13494	Methy	2.38679	Methy	3.17307	Methy	2.43428	Methy	2.91973	Margin	-1.34337	Margin	-0.861282	Margin	-0.623476	Margin	0.285909
cg00980058	1	231315332	PCNXL2	NM_014801	Body	NA	T2D	Margin	-1.16401	Margin	-0.456904	Margin	0.424205	Margin	0.0896293	Margin	-1.06548	Margin	-0.83254	Unmethy	-3.33429	Unmethy	-2.85669	Unmethy	-3.5185	Unmethy	-3.66166
cg16371229	1	231315468	PCNXL2	NM_014801	Body	NA	T2D	Unmethy	-2.23872	Margin	-1.45221	Margin	-0.366423	Margin	-1.41125	Unmethy	-2.64437	Margin	-1.58057	Unmethy	-3.22472	Unmethy	-3.03762	Unmethy	-3.07132	Unmethy	-3.2873
cg10576245	1	231315890	PCNXL2	NM_014801	Body	NA	T2D	Margin	-1.22357	Margin	-0.301685	Margin	0.53837	Margin	0.332675	Margin	-0.106891	Margin	-0.882123	Unmethy	-3.33432	Unmethy	-2.7892	Unmethy	-2.98055	Unmethy	-3.24486
cg17894435	1	231492957	PCNXL2	NM_014801	Body	NA	T2D	Margin	0.818246	Methy	1.40562	Methy	2.4695	Methy	2.62217	Methy	2.17966	Methy	1.71715	Unmethy	-2.21558	Margin	0.675878	Margin	0.463547	Margin	0.837794
cg24134261	2	33514866	RASGRP3	NM_170672	TSS200	NA	SLE	Margin	-0.782068	Margin	-0.0973471	Margin	0.825667	Margin	0.812384	Margin	0.0089247	Margin	-0.492384	Unmethy	-1.92036	Margin	-1.53629	Unmethy	-1.56177	Margin	-1.05237
cg06971903	2	33574050	RASGRP3;RASGRP3	NM_001139488;NM_170672	5'UTR;5'UTR	NA	SLE	Margin	0.919314	Methy	1.0916	Methy	1.04745	Margin	0.753794	Margin	0.90407	Margin	0.532676	Methy	0.686154	Methy	0.810684	Methy	0.970621	Methy	0.867957
cg21244038	2	33590957	RASGRP3;RASGRP3;RASGRP3	NM_001139488;NM_170672;NM_015376	5'UTR;5'UTR;TSS1500	NA	SLE	Methy	2.44286	Methy	2.35628	Methy	2.39512	Methy	2.29032	Methy	2.62517	Methy	1.27952	Methy	2.71835	Methy	2.47726	Methy	2.076	Margin	0.69151
cg27236007	2	33609157	RASGRP3;RASGRP3;RASGRP3	NM_001139488;NM_015376;NM_170672	Body;Body;Body	NA	SLE	Methy	2.64005	Methy	2.47675	Methy	3.16808	Methy	2.89723	Methy	2.72422	Margin	-0.987551	Methy	2.57553	Methy	2.63729	Methy	2.72343	Methy	2.72247
cg18200741	2	33633870	RASGRP3;RASGRP3;RASGRP3	NM_001139488;NM_015376;NM_170672	Body;Body;Body	NA	SLE	Margin	-0.895923	Margin	-0.362402	Margin	0.445053	Margin	0.471905	Margin	0.122928	Margin	-0.400969	Unmethy	-3.31173	Unmethy	-2.21553	Unmethy	-2.02168	Margin	-1.37807
cg00607755	2	42127586	PKDCC	NM_138370	TSS1500	NA	Atopy	Margin	-0.161892	Margin	0.549057	Methy	1.06924	Methy	0.981761	Margin	0.764962	Margin	1.03903	Margin	-0.671614	Margin	-0.739404	Margin	-0.768044	Margin	-0.899198
cg12630082	2	42129244	PKDCC	NM_138370	1stExon	NA	Atopy	Unmethy	-1.96691	Unmethy	-1.84586	Unmethy	-1.98829	Margin	-0.789691	Margin	-1.6044	Margin	-1.08591	Unmethy	-3.30889	Unmethy	-2.98863	Unmethy	-3.70371	Unmethy	-4.1068
cg22076676	2	43357439	THADA;THADA	NM_022065;NM_001083953	Body;Body	NA	T2D	Methy	1.52862	Methy	1.05197	Methy	1.8747	Methy	2.29421	Methy	1.96135	Methy	1.599	Margin	-0.799333	Methy	1.95338	Methy	2.0683	Methy	2.39149
cg01649611	2	43374570	THADA;THADA	NM_022065;NM_001083953	Body;Body	NA	T2D	Unmethy	-2.10552	Margin	-1.12204	Margin	-1.08428	Margin	-1.18256	Margin	-1.16923	Margin	0.140206	Unmethy	-3.33686	Unmethy	-3.53443	Unmethy	-3.58934	Unmethy	-3.64833
cg22033476	2	43385779	THADA;THADA	NM_022065;NM_001083953	Body;Body	NA	T2D	Margin	0.443423	Methy	1.3504	Methy	2.33493	Methy	2.93137	Methy	2.8559	Methy	3.31538	Unmethy	-2.22611	Margin	-1.56198	Unmethy	-2.20326	Unmethy	-2.29675
cg14044785	2	43413872	THADA;THADA	NM_022065;NM_001083953	Body;Body	NA	T2D	Margin	-0.0110685	Methy	1.22653	Methy	2.46018	Methy	2.66018	Methy	2.18379	Methy	1.93832	Unmethy	-2.46642	Margin	-1.55759	Unmethy	-1.96368	Unmethy	-1.73956
cg16472853	2	43452463	THADA;THADA	NM_022065;NM_001083953	Body;Body	NA	T2D	Methy	3.76647	Methy	3.91103	Methy	4.2419	Methy	4.10745	Methy	4.12446	Methy	4.0824	Methy	3.27515	Methy	3.33065	Methy	2.15943	Margin	-0.301686
cg25748958	2	43526156	THADA;THADA	NM_022065;NM_001083953	Body;Body	NA	T2D	Margin	0.453301	Margin	0.902471	Methy	1.21088	Methy	1.73724	Methy	1.75938	Methy	1.65319	Margin	-0.680209	Margin	-0.225818	Margin	-0.248895	Margin	-1.09839
cg25938803	2	43620851	THADA;THADA	NM_022065;NM_001083953	Body;Body	NA	T2D	Margin	0.225196	Methy	1.47937	Methy	2.97448	Methy	3.38633	Methy	2.82369	Methy	3.30479	Unmethy	-2.96635	Unmethy	-2.50808	Unmethy	-3.02173	Unmethy	-3.1265
cg19040195	2	60540636	BCL11A;BCL11A;BCL11A	NM_022893;NM_138559;NM_018014	3'UTR;Body;Body	N_Shore	T2D	Margin	-0.254119	Margin	0.556139	Methy	1.05228	Methy	0.992838	Margin	0.57271	Methy	1.71664	Unmethy	-1.93231	Margin	-1.46213	Margin	-0.850999	Methy	1.06411
cg02334333	2	60540896	BCL11A;BCL11A;BCL11A	NM_022893;NM_138559;NM_018014	3'UTR;Body;Body	N_Shore	T2D	Margin	-0.469029	Margin	0.555632	Methy	1.07448	Methy	1.06668	Methy	1.05657	Margin	1.05042	Margin	-1.20744	Margin	-1.87663	Margin	-1.22866	Margin	-0.00198127
cg04588436	2	60552441	BCL11A;BCL11A;BCL11A	NM_022893;NM_138559;NM_018014	Body;Body;Body	NA	T2D	Methy	2.34534	Methy	2.50791	Methy	2.80187	Methy	2.51627	Methy	2.58122	Margin	0.367018	Methy	2.64897	Methy	2.33381	Methy	2.51937	Methy	2.64534
cg07469838	2	60556588	BCL11A;BCL11A;BCL11A	NM_022893;NM_138559;NM_018014	Body;Body;Body	NA	T2D	Methy	2.39461	Methy	1.93746	Methy	1.41117	Margin	0.741063	Margin	0.968815	Methy	3.61528	Methy	3.31499	Methy	2.80938	Methy	3.18766	Methy	3.45683
cg12972447	2	60567522	BCL11A;BCL11A;BCL11A	NM_022893;NM_138559;NM_018014	Body;Body;Body	NA	T2D	Methy	1.51325	Methy	1.22009	Margin	0.900933	Margin	0.458804	Margin	0.535512	Methy	2.65327	Methy	2.43871	Methy	2.01037	Methy	2.22677	Methy	2.42671
cg09670127	2	60576306	BCL11A;BCL11A;BCL11A	NM_022893;NM_138559;NM_018014	Body;Body;Body	NA	T2D	Methy	1.0414	Methy	2.23315	Methy	2.79682	Methy	2.7992	Methy	2.55681	Methy	2.71639	Methy	1.25421	Margin	0.313287	Margin	0.429823	Margin	0.78395
cg03606511	2	60589034	BCL11A;BCL11A;BCL11A	NM_022893;NM_138559;NM_018014	Body;Body;Body	NA	T2D	Margin	0.543678	Methy	1.62906	Methy	1.8221	Methy	1.67985	Methy	1.63268	Methy	1.64606	Methy	1.19239	Margin	-0.0717708	Margin	0.0706604	Margin	0.665219
cg26149739	2	60590891	BCL11A;BCL11A;BCL11A	NM_022893;NM_138559;NM_018014	Body;Body;Body	NA	T2D	Margin	0.786399	Margin	0.856701	Margin	0.756413	Margin	0.235774	Margin	0.2072	Methy	1.5945	Methy	1.40119	Methy	0.862374	Methy	1.07826	Methy	1.60908
cg24361098	2	60602455	BCL11A;BCL11A;BCL11A	NM_022893;NM_138559;NM_018014	Body;Body;Body	NA	T2D	Margin	0.86338	Margin	-0.0346783	Margin	-0.8803	Margin	-1.49817	Margin	-0.239491	Margin	-1.72996	Methy	1.5783	Methy	0.92307	Methy	1.06151	Margin	0.325561
cg16951074	2	60608863	BCL11A;BCL11A;BCL11A	NM_022893;NM_138559;NM_018014	Body;Body;Body	NA	T2D	Margin	0.427486	Methy	1.69874	Methy	2.66204	Methy	2.96712	Methy	2.58285	Methy	3.05575	Margin	-0.624932	Margin	-0.90045	Margin	-0.278849	Methy	2.09787
cg17935536	2	60609247	BCL11A;BCL11A;BCL11A	NM_022893;NM_138559;NM_018014	Body;Body;Body	NA	T2D	Margin	-0.521164	Margin	0.615263	Methy	1.64084	Methy	2.10483	Methy	1.53959	Methy	2.0943	Margin	-1.37428	Unmethy	-2.14477	Unmethy	-2.06131	Unmethy	-1.54809
cg01005605	2	60611406	BCL11A;BCL11A;BCL11A	NM_022893;NM_138559;NM_018014	Body;Body;Body	NA	T2D	Unmethy	-2.08899	Margin	-1.05242	Margin	-0.280107	Margin	-0.544472	Margin	-0.854117	Unmethy	-2.64159	Unmethy	-3.45168	Unmethy	-2.91819	Unmethy	-3.11585	Unmethy	-3.40982
cg27159979	2	60616835	BCL11A;BCL11A;BCL11A	NM_022893;NM_138559;NM_018014	Body;Body;Body	NA	T2D	Methy	1.81828	Methy	1.22301	Methy	1.04183	Margin	0.618074	Margin	0.733513	Margin	-0.741674	Methy	3.03327	Methy	2.92593	Methy	3.00061	Methy	2.97748
cg11686208	2	60616861	BCL11A;BCL11A;BCL11A	NM_022893;NM_138559;NM_018014	Body;Body;Body	NA	T2D	Methy	2.60032	Methy	2.3391	Methy	2.56769	Methy	2.35205	Methy	2.36022	Margin	0.126346	Methy	2.87578	Methy	2.85167	Methy	2.98366	Methy	2.80947
cg10853543	2	60617130	BCL11A;BCL11A;BCL11A	NM_022893;NM_138559;NM_018014	Body;Body;Body	NA	T2D	Methy	2.4299	Methy	2.17374	Methy	2.324	Methy	1.81764	Methy	1.58183	Margin	0.903933	Methy	2.38215	Methy	2.13622	Methy	2.34172	Methy	2.42886
cg10600647	2	60617312	BCL11A;BCL11A;BCL11A	NM_022893;NM_138559;NM_018014	Body;Body;Body	NA	T2D	Methy	1.56598	Methy	1.71976	Methy	1.90494	Methy	1.99701	Methy	2.02305	Margin	0.530825	Methy	1.44272	Methy	1.36362	Methy	1.24296	Methy	0.889657
cg00543073	2	60626890	BCL11A;BCL11A;BCL11A	NM_022893;NM_138559;NM_018014	Body;Body;Body	N_Shelf	T2D	Margin	-0.137414	Margin	0.235901	Margin	0.68853	Margin	0.605019	Margin	-0.143553	Unmethy	-1.90191	Margin	0.00857532	Margin	-0.158327	Margin	-0.20515	Margin	-0.521676
cg17738213	2	60629806	BCL11A;BCL11A;BCL11A	NM_022893;NM_138559;NM_018014	Body;Body;Body	N_Shore	T2D	Margin	-1.89497	Margin	-0.970514	Margin	-0.513179	Margin	-0.190857	Margin	0.273308	Unmethy	-3.65069	Unmethy	-3.64086	Unmethy	-3.01819	Unmethy	-3.32043	Unmethy	-3.50389
cg08627352	2	60631899	BCL11A;BCL11A;BCL11A	NM_022893;NM_138559;NM_018014	Body;Body;Body	N_Shore	T2D	Unmethy	-2.70216	Unmethy	-1.9818	Margin	-1.47384	Margin	-1.413	Margin	-1.47161	Unmethy	-3.59343	Unmethy	-3.61774	Unmethy	-3.31274	Unmethy	-3.44678	Unmethy	-3.51871
cg20913063	2	60632693	BCL11A;BCL11A;BCL11A	NM_022893;NM_138559;NM_018014	Body;Body;Body	N_Shore	T2D	Margin	-0.9432	Margin	-0.8833	Margin	-0.729159	Margin	-0.577276	Margin	-0.654056	Margin	-1.54566	Margin	-1.33898	Margin	-1.39225	Unmethy	-1.55807	Margin	-1.39164
cg03754165	2	60633931	BCL11A;BCL11A;BCL11A;BCL11A;BCL11A;BCL11A	NM_138559;NM_022893;NM_018014;NM_138559;NM_022893;NM_018014	1stExon;1stExon;1stExon;5'UTR;5'UTR;5'UTR	N_Shore	T2D	Margin	-1.12181	Margin	-1.02101	Margin	-1.27621	Margin	-1.08769	Margin	-1.11174	Margin	-1.4525	Margin	-1.11257	Margin	-1.37158	Unmethy	-1.70496	Margin	-1.43515
cg16976628	2	60637065	NA	NA	NA	S_Shore	T2D	Margin	-1.53364	Margin	-0.944769	Margin	-0.614128	Margin	0.14885	Margin	-0.727998	Unmethy	-2.01458	Unmethy	-2.59925	Unmethy	-2.55654	Unmethy	-3.02159	Unmethy	-2.9722
cg23281123	2	65393915	SPRED2;SPRED2	NM_001128210;NM_181784	3'UTR;3'UTR	N_Shore	RA	Margin	0.00404718	Margin	0.432394	Margin	0.492555	Methy	1.47346	Methy	2.03317	Margin	-0.376771	Margin	-0.846033	Margin	-0.538952	Margin	-0.344108	Margin	0.416759
cg01751245	2	65447265	SPRED2;SPRED2;SPRED2	NM_001128210;NM_001128210;NM_181784	5'UTR;1stExon;Body	NA	RA	Methy	1.37355	Methy	1.34424	Methy	2.18508	Methy	1.46108	Methy	0.996582	Methy	1.17125	Margin	-0.0189658	Methy	1.45545	Methy	1.36761	Methy	2.3156
cg09884146	2	65447412	SPRED2;SPRED2;SPRED2	NM_001128210;NM_001128210;NM_181784	5'UTR;1stExon;Body	NA	RA	Margin	-0.3478	Margin	0.349701	Methy	1.49317	Methy	0.978552	Margin	0.203743	Margin	0.966878	Unmethy	-2.89052	Margin	-1.2879	Margin	-0.846393	Margin	0.614527
cg08467103	2	65447437	SPRED2;SPRED2	NM_001128210;NM_181784	TSS200;Body	NA	RA	Margin	-0.0345708	Margin	0.899575	Methy	2.00057	Methy	1.39123	Margin	0.779145	Methy	1.89179	Unmethy	-3.14618	Margin	-1.00506	Margin	-0.554617	Methy	1.14642
cg26376241	2	65447525	SPRED2;SPRED2	NM_001128210;NM_181784	TSS200;Body	NA	RA	Margin	-0.713531	Margin	0.0432671	Margin	0.615741	Margin	-0.0137133	Margin	-0.50492	Margin	0.158013	Unmethy	-2.94724	Margin	-1.13066	Margin	-0.913534	Margin	0.691758
cg14480116	2	65448394	SPRED2;SPRED2	NM_001128210;NM_181784	TSS1500;Body	NA	RA	Margin	0.023848	Methy	1.5398	Methy	3.14628	Methy	3.1964	Methy	2.87905	Methy	1.86538	Margin	-1.39172	Unmethy	-1.96175	Margin	-1.00874	Methy	1.2515
cg24200960	2	65458414	SPRED2	NM_181784	Body	NA	RA	Margin	-0.5559	Margin	0.258463	Methy	1.41166	Methy	1.65397	Margin	0.64355	Margin	-0.104961	Unmethy	-2.89137	Unmethy	-2.1412	Unmethy	-1.79293	Margin	-0.96659
cg11674355	2	65463765	SPRED2	NM_181784	Body	NA	RA	Margin	-1.61777	Unmethy	-1.81584	Unmethy	-2.53618	Unmethy	-2.67231	Unmethy	-2.606	Unmethy	-1.78326	Margin	-1.70618	Margin	-1.59324	Unmethy	-1.58372	Unmethy	-1.53642
cg22854448	2	65470707	SPRED2	NM_181784	Body	NA	RA	Margin	0.346983	Margin	0.872813	Methy	1.12106	Methy	1.81624	Methy	1.53988	Margin	-1.18562	Margin	-0.00135156	Margin	-0.00630741	Margin	-0.025388	Margin	-0.0409339
cg24872815	2	65477045	SPRED2	NM_181784	Body	NA	RA	Methy	2.26168	Methy	1.69654	Methy	1.43976	Methy	1.90754	Methy	2.53242	Margin	0.310215	Methy	1.84699	Methy	1.90337	Methy	1.93119	Methy	2.18131
cg10256249	2	65511082	SPRED2	NM_181784	Body	N_Shore	RA	Margin	-1.38517	Margin	-0.686867	Margin	-0.304068	Margin	-0.185763	Margin	-0.15069	Unmethy	-2.13586	Unmethy	-2.66888	Unmethy	-2.54829	Unmethy	-2.75543	Unmethy	-2.68278
cg02756655	2	65517136	NA	NA	NA	Island	RA	Margin	-1.3151	Margin	-1.21965	Margin	-1.40774	Margin	-1.45135	Margin	-1.27139	Margin	-1.35148	Margin	-1.54292	Margin	-1.41046	Margin	-1.27638	Unmethy	-1.57299
cg17165836	2	99542237	AFF3;AFF3	NM_001025108;NM_002285	Body;Body	NA	RA,T1D	Unmethy	-2.28646	Unmethy	-1.86524	Unmethy	-1.90655	Margin	-1.64205	Margin	-1.46275	Unmethy	-1.79236	Unmethy	-2.90185	Unmethy	-2.80386	Unmethy	-2.99006	Unmethy	-3.11214
cg02245998	2	99577058	AFF3;AFF3	NM_001025108;NM_002285	Body;Body	S_Shore	RA,T1D	Methy	1.90875	Methy	1.79665	Methy	1.89286	Methy	1.475	Methy	1.27774	Margin	0.283726	Methy	2.17342	Methy	1.99993	Methy	2.01145	Methy	2.17557
cg14793844	2	99883312	AFF3;AFF3	NM_001025108;NM_002285	Body;Body	NA	RA,T1D	Methy	2.28479	Methy	2.15656	Methy	1.89871	Margin	0.683373	Margin	0.450669	Methy	3.42459	Methy	3.15864	Methy	2.56129	Methy	2.81568	Methy	2.50022
cg01286950	2	99984831	AFF3;AFF3	NM_001025108;NM_002285	Body;Body	NA	RA,T1D	Methy	5.56595	Margin	5.83224	Methy	5.92109	Unmethy	5.94432	Unmethy	6.00716	Methy	5.55251	Methy	5.96049	Methy	5.84267	Methy	5.79486	Methy	5.46657
cg03816062	2	99984898	AFF3;AFF3	NM_001025108;NM_002285	Body;Body	NA	RA,T1D	Methy	6.00802	Margin	5.95639	Margin	6.01088	Methy	5.49963	Methy	5.3397	Methy	6.2889	Methy	5.96378	Methy	5.71915	Methy	5.57988	Methy	5.18926
cg14057383	2	100003034	AFF3;AFF3	NM_001025108;NM_002285	Body;Body	NA	RA,T1D	Margin	0.722531	Methy	2.06922	Methy	2.92382	Methy	3.19607	Methy	2.55506	Methy	3.63758	Margin	0.466221	Margin	-0.589819	Margin	-0.164353	Methy	1.03982
cg27315109	2	100043843	AFF3;AFF3	NM_001025108;NM_002285	Body;Body	NA	RA,T1D	Methy	1.4684	Margin	0.25426	Unmethy	-1.8661	Unmethy	-3.16443	Margin	-1.18511	Methy	1.70788	Methy	2.81596	Methy	2.51955	Methy	3.00232	Methy	2.78207
cg20059337	2	100053125	AFF3;AFF3	NM_001025108;NM_002285	Body;Body	NA	RA,T1D	Margin	-0.879095	Margin	-0.245645	Margin	0.56154	Margin	0.128043	Margin	-0.717016	Margin	0.795078	Unmethy	-2.50716	Unmethy	-1.96846	Unmethy	-2.00589	Unmethy	-1.8722
cg13353679	2	100086611	AFF3;AFF3	NM_001025108;NM_002285	Body;Body	N_Shore	RA,T1D	Methy	1.30572	Methy	1.35856	Methy	1.32675	Methy	1.25607	Methy	1.34206	Margin	0.987158	Methy	1.46752	Methy	1.50308	Methy	1.34053	Methy	1.46519
cg22139774	2	100086961	AFF3;AFF3	NM_001025108;NM_002285	Body;Body	Island	RA,T1D	Margin	-1.41003	Margin	-1.01367	Margin	-1.02052	Margin	-1.28331	Margin	-1.03869	Margin	-1.1959	Margin	-1.68234	Margin	-1.84299	Unmethy	-1.55447	Unmethy	-1.60844
cg21988972	2	100126055	AFF3	NM_002285	TSS1500	NA	RA,T1D	Margin	0.756492	Margin	0.453913	Methy	1.08393	Margin	0.569541	Margin	-0.0902898	Margin	-0.325223	Margin	-0.319571	Methy	1.10856	Methy	1.2913	Methy	1.27349
cg17273588	2	100126783	AFF3	NM_002285	TSS1500	NA	RA,T1D	Methy	1.21744	Methy	1.02447	Methy	1.16815	Margin	0.44026	Margin	0.206508	Margin	1.0764	Methy	1.59965	Methy	1.28913	Methy	1.40036	Methy	1.1441
cg22305850	2	100190535	NA	NA	NA	NA	RA,T1D	Margin	0.716996	Margin	0.586382	Margin	0.585052	Margin	0.147791	Margin	0.232251	Margin	0.650087	Methy	0.793891	Methy	0.813717	Methy	0.936359	Margin	0.812831
cg15996397	2	100197621	NA	NA	NA	NA	RA,T1D	Methy	0.960694	Methy	1.07211	Methy	1.32768	Margin	0.671506	Margin	0.534057	Methy	1.79848	Methy	0.813453	Methy	0.942178	Methy	1.1148	Methy	1.69136
cg04369903	2	100229836	NA	NA	NA	NA	RA,T1D	Margin	0.876705	Methy	1.28546	Methy	1.64231	Methy	1.77193	Methy	1.37806	Methy	1.29886	Margin	0.659973	Methy	0.750351	Margin	0.774886	Margin	0.624377
cg10081994	2	100275069	LONRF2	NM_198461	Body	NA	RA,T1D	Methy	1.38698	Margin	0.927721	Margin	-0.198367	Margin	0.107848	Margin	0.782944	Methy	2.3772	Methy	1.87378	Methy	1.58754	Methy	1.10875	Unmethy	-1.66615
cg12232463	2	100293082	LONRF2	NM_198461	Body	NA	RA,T1D	Methy	2.31761	Methy	1.74461	Methy	1.50357	Margin	0.854327	Margin	0.629257	Methy	1.78785	Methy	2.74643	Methy	2.74781	Methy	2.75386	Methy	3.21576
cg05692746	2	100304016	LONRF2	NM_198461	Body	N_Shore	RA,T1D	Margin	0.864873	Methy	1.01445	Margin	0.959356	Methy	1.32271	Methy	1.26878	Methy	1.22646	Margin	0.511258	Margin	0.571316	Margin	0.535881	Margin	0.599204
cg00144550	2	100304228	LONRF2	NM_198461	Body	Island	RA,T1D	Unmethy	-2.01736	Unmethy	-2.00824	Unmethy	-2.08088	Margin	-1.89617	Margin	-1.83798	Unmethy	-1.90765	Unmethy	-2.46543	Unmethy	-2.45812	Unmethy	-2.30501	Unmethy	-2.46068
cg03559235	2	100304376	LONRF2	NM_198461	1stExon	Island	RA,T1D	Unmethy	-2.32216	Unmethy	-2.44408	Unmethy	-2.22243	Margin	-1.77589	Unmethy	-2.09794	Unmethy	-2.13742	Unmethy	-2.38997	Unmethy	-2.73353	Unmethy	-2.59201	Unmethy	-2.59761
cg13781121	2	100308630	NA	NA	NA	S_Shelf	RA,T1D	Margin	0.774496	Methy	1.06643	Margin	0.827391	Margin	0.338615	Margin	0.479293	Margin	0.360131	Margin	0.360418	Methy	0.794475	Margin	0.637246	Margin	0.533011
cg17738684	2	102293710	IL1RL1	NM_016232	TSS1500	NA	Asthma	Methy	2.88404	Methy	3.16985	Methy	3.17011	Methy	3.23501	Methy	3.52205	Methy	2.95589	Methy	3.15624	Methy	2.79598	Methy	1.55574	Margin	-1.15065
cg16386158	2	102293829	IL1RL1	NM_016232	TSS1500	NA	Asthma	Methy	2.80978	Methy	3.44509	Methy	3.38746	Methy	3.44285	Methy	3.02174	Methy	3.8568	Methy	3.44024	Methy	2.16159	Methy	1.36317	Unmethy	-1.66672
cg11916609	2	102293920	IL1RL1	NM_016232	TSS1500	NA	Asthma	Margin	0.0532726	Methy	1.47911	Methy	2.86981	Methy	2.72184	Methy	1.49084	Methy	2.36128	Margin	0.0243912	Unmethy	-2.17898	Unmethy	-2.78446	Unmethy	-3.29755
cg19969733	2	102294330	IL1RL1	NM_016232	TSS200	NA	Asthma	Margin	-0.0346938	Methy	1.02156	Methy	1.85666	Methy	1.78919	Margin	0.465684	Methy	1.4248	Margin	-0.0500704	Margin	-1.4051	Unmethy	-1.60255	Unmethy	-2.10861
cg19795292	2	102318717	IL1RL1;IL1RL1	NM_016232;NM_003856	5'UTR;TSS1500	NA	Asthma	Methy	1.01179	Methy	1.87392	Methy	2.94666	Methy	3.17728	Methy	2.92704	Methy	1.95249	Margin	0.323364	Margin	0.100271	Margin	-0.177166	Unmethy	-2.00617
cg25869196	2	102318851	IL1RL1;IL1RL1	NM_016232;NM_003856	5'UTR;TSS1500	NA	Asthma	Margin	0.262083	Methy	1.41627	Methy	2.38139	Methy	2.54398	Methy	1.4827	Methy	1.29861	Margin	-0.850138	Margin	-1.03408	Margin	-1.33938	Unmethy	-2.65055
cg20060108	2	102320782	IL1RL1;IL1RL1	NM_003856;NM_016232	5'UTR;5'UTR	NA	Asthma	Margin	0.587043	Methy	1.23833	Methy	1.45918	Methy	0.963282	Margin	0.48076	Margin	0.233437	Methy	1.95753	Margin	0.0702597	Margin	-0.120132	Unmethy	-2.11334
cg15152331	2	160667056	ITGB6	NM_000888	Body	NA	T2D	Methy	1.88042	Methy	1.41166	Methy	1.18151	Methy	1.05468	Margin	0.912642	Margin	-0.175269	Methy	1.99028	Methy	2.22787	Methy	2.1936	Methy	2.20698
cg04737150	2	160785993	NA	NA	NA	NA	T2D	Methy	1.96991	Methy	1.47293	Margin	0.626425	Margin	0.603729	Methy	0.988879	Methy	1.94261	Methy	2.68275	Methy	2.63026	Methy	2.76443	Methy	2.73828
cg22512663	2	160830669	NA	NA	NA	N_Shelf	T2D	Margin	0.734601	Margin	0.482562	Margin	0.190539	Margin	-0.043211	Margin	-0.235889	Margin	0.490657	Methy	0.979864	Methy	1.01477	Methy	1.06801	Methy	1.10248
cg01566396	2	160834541	NA	NA	NA	N_Shore	T2D	Unmethy	-2.45953	Unmethy	-2.37874	Unmethy	-3.18052	Unmethy	-3.23727	Unmethy	-2.50011	Unmethy	-1.88958	Margin	-1.87872	Unmethy	-1.98324	Unmethy	-1.9262	Unmethy	-2.00347
cg22609984	2	160835047	NA	NA	NA	Island	T2D	Unmethy	-3.18889	Unmethy	-2.51709	Margin	-1.22622	Margin	-2.06093	Unmethy	-3.48333	Unmethy	-4.45714	Unmethy	-4.92673	Unmethy	-4.3541	Unmethy	-4.77499	Unmethy	-4.94286
cg17319011	2	160845248	RBMS1;RBMS1	NM_002897;NM_016836	Body;Body	NA	T2D	Margin	0.922147	Methy	1.29445	Methy	1.3462	Methy	1.3505	Methy	1.5464	Methy	1.36329	Methy	1.48081	Methy	1.42682	Methy	1.43138	Methy	1.44712
cg17327171	2	160864467	RBMS1;RBMS1	NM_002897;NM_016836	Body;Body	NA	T2D	Margin	-0.786782	Margin	-0.154533	Margin	-0.245277	Margin	0.0499371	Margin	-0.0457301	Methy	1.19049	Margin	-0.822575	Margin	-1.26601	Margin	-1.38108	Unmethy	-2.89368
cg05135521	2	160896581	RBMS1;RBMS1	NM_002897;NM_016836	Body;Body	NA	T2D	Margin	0.638722	Margin	0.10392	Margin	-1.53713	Margin	-1.26703	Margin	-0.00675168	Methy	1.39516	Methy	1.14327	Methy	0.916997	Methy	1.00484	Methy	1.06831
cg18172516	2	160923102	RBMS1;RBMS1	NM_002897;NM_016836	Body;Body	NA	T2D	Margin	0.687607	Methy	1.14328	Margin	0.952441	Methy	1.00213	Margin	0.949454	Margin	0.829607	Methy	0.745202	Margin	0.373069	Methy	0.941206	Methy	0.933425
cg17360854	2	160933017	RBMS1;RBMS1	NM_002897;NM_016836	Body;Body	NA	T2D	Unmethy	-2.97573	Unmethy	-2.06847	Margin	-0.852177	Unmethy	-3.02951	Unmethy	-4.92923	Unmethy	-4.29553	Unmethy	-5.62333	Unmethy	-4.25441	Unmethy	-5.66344	Unmethy	-6.30104
cg01256139	2	160936983	RBMS1;RBMS1	NM_002897;NM_016836	Body;Body	NA	T2D	Margin	-0.261611	Margin	0.707863	Methy	2.19947	Methy	1.64532	Margin	0.413613	Methy	1.41451	Unmethy	-2.70164	Unmethy	-2.46651	Unmethy	-2.97101	Unmethy	-2.78849
cg00754604	2	160938292	RBMS1;RBMS1	NM_002897;NM_016836	Body;Body	NA	T2D	Margin	0.438141	Methy	1.61916	Methy	2.0065	Methy	2.13048	Methy	1.40209	Methy	2.92197	Methy	0.745539	Margin	-0.637572	Margin	-0.714315	Margin	-0.54374
cg26055370	2	160942025	RBMS1;RBMS1	NM_002897;NM_016836	Body;Body	NA	T2D	Methy	2.45131	Methy	2.92613	Methy	3.09762	Methy	2.88603	Methy	2.24755	Margin	1.05478	Methy	2.68988	Methy	2.11177	Methy	1.64263	Margin	-0.340816
cg00760729	2	160944334	RBMS1;RBMS1	NM_002897;NM_016836	Body;Body	NA	T2D	Margin	-0.275487	Margin	0.867258	Methy	1.9096	Methy	2.17526	Methy	1.1031	Methy	1.41504	Unmethy	-3.08117	Unmethy	-2.69723	Unmethy	-3.00679	Unmethy	-3.57019
cg00335252	2	160953446	RBMS1;RBMS1	NM_002897;NM_016836	Body;Body	NA	T2D	Unmethy	-2.07961	Unmethy	-1.94324	Unmethy	-1.73972	Margin	-1.36656	Margin	-1.66412	Unmethy	-2.21166	Unmethy	-2.73358	Unmethy	-2.63181	Unmethy	-2.76071	Unmethy	-2.6762
cg17824540	2	160968277	RBMS1;RBMS1	NM_002897;NM_016836	Body;Body	N_Shelf	T2D	Methy	1.49186	Margin	0.582422	Margin	0.683727	Margin	-0.750276	Margin	-1.39413	Methy	1.97907	Methy	0.772002	Methy	2.31157	Methy	1.88816	Methy	0.929773
cg08035195	2	160970260	RBMS1;RBMS1	NM_002897;NM_016836	Body;Body	N_Shore	T2D	Methy	2.5474	Methy	2.02976	Methy	2.00549	Margin	0.496279	Margin	0.648673	Methy	2.81614	Methy	2.84611	Methy	2.69736	Methy	2.95412	Methy	2.70615
cg23489137	2	160998695	RBMS1;RBMS1	NM_002897;NM_016836	Body;Body	NA	T2D	Margin	-0.496977	Margin	0.66954	Margin	0.440358	Methy	1.49808	Methy	1.41762	Methy	1.74413	Margin	-1.43971	Margin	-1.30753	Margin	-1.47319	Unmethy	-1.6591
cg20385461	2	161050629	RBMS1;RBMS1	NM_002897;NM_016836	Body;Body	NA	T2D	Methy	1.64225	Methy	1.40701	Margin	0.55508	Methy	1.15138	Methy	1.24736	Methy	1.29571	Methy	2.20283	Methy	2.18959	Methy	2.16137	Methy	2.37919
cg00314029	2	161056911	RBMS1;RBMS1	NM_002897;NM_016836	Body;Body	N_Shore	T2D	Methy	2.44347	Methy	2.34084	Margin	0.809136	Methy	2.05099	Methy	2.70399	Methy	3.1747	Methy	2.59823	Methy	2.91397	Methy	3.14667	Methy	2.79133
cg02772995	2	161057027	RBMS1;RBMS1	NM_002897;NM_016836	Body;Body	N_Shore	T2D	Methy	2.36427	Methy	1.91904	Margin	0.758314	Methy	2.45601	Methy	2.85357	Methy	3.21442	Methy	2.43781	Methy	2.61383	Methy	2.88809	Methy	3.00542
cg26118435	2	161059072	RBMS1;RBMS1	NM_002897;NM_016836	TSS1500;TSS1500	S_Shore	T2D	Margin	-1.21596	Margin	-0.4488	Margin	0.251428	Margin	0.0583678	Margin	-0.66791	Margin	-1.49199	Unmethy	-1.91802	Margin	-1.8661	Unmethy	-1.97704	Unmethy	-2.03473
cg03538095	2	162847962	IFIH1	NM_022168	Body	NA	T1D	Margin	0.730011	Methy	1.23947	Methy	1.26673	Methy	1.00702	Methy	1.41086	Methy	1.3818	Margin	0.441159	Margin	0.457027	Margin	0.717639	Methy	1.03932
cg15636519	2	191602663	STAT4	NM_003151	3'UTR	NA	RA,SLE	Unmethy	-2.05143	Margin	-1.59692	Unmethy	-2.0054	Unmethy	-2.49904	Unmethy	-2.46411	Margin	-0.187623	Margin	-1.23144	Unmethy	-2.70429	Unmethy	-2.43238	Unmethy	-2.53752
cg07619170	2	191611739	STAT4	NM_003151	Body	NA	RA,SLE	Methy	2.19323	Methy	2.18822	Methy	2.32917	Methy	1.178	Margin	0.687843	Methy	2.91454	Methy	2.4973	Methy	2.61065	Methy	2.43528	Methy	2.45059
cg01004382	2	191724241	STAT4	NM_003151	TSS200	NA	RA,SLE	Margin	-1.24166	Margin	-1.33807	Unmethy	-1.98457	Margin	-1.78784	Margin	-1.62965	Margin	-0.86583	Margin	-0.764798	Margin	-0.990912	Margin	-0.847463	Margin	-0.548283
cg08460026	2	204440719	CTLA4;CTLA4	NM_001037631;NM_005214	TSS200;TSS200	NA	RA,T1D/Asthma	Margin	-0.702246	Margin	-1.67284	Unmethy	-3.29625	Unmethy	-4.26389	Unmethy	-3.48212	Unmethy	-1.83181	Margin	0.368802	Margin	0.181074	Margin	0.406366	Margin	0.383393
cg05074138	2	204440932	CTLA4;CTLA4	NM_001037631;NM_005214	1stExon;1stExon	NA	RA,T1D/Asthma	Methy	1.60285	Margin	0.754179	Margin	-1.51948	Margin	-0.317456	Methy	1.96045	Methy	3.23569	Methy	2.98844	Methy	2.64971	Methy	2.99788	Methy	2.85694
cg26091609	2	204442426	CTLA4;CTLA4	NM_001037631;NM_005214	Body;Body	NA	RA,T1D/Asthma	Methy	2.41333	Methy	1.98249	Margin	0.316458	Methy	1.52008	Methy	2.32328	Methy	3.34724	Methy	3.20534	Methy	3.01584	Methy	3.20812	Methy	3.06715
cg13008631	2	227371278	IRS1	NM_005544	1stExon	Island	T2D	Margin	0.811967	Methy	1.03188	Methy	1.45544	Methy	1.5615	Methy	1.27903	Margin	0.43787	Methy	0.82158	Methy	0.799697	Margin	0.885988	Margin	0.846917
cg08166272	2	227371395	IRS1	NM_005544	1stExon	Island	T2D	Margin	-0.951227	Margin	-0.988264	Margin	-1.27361	Margin	-1.6653	Margin	-0.920091	Unmethy	-1.94691	Margin	-1.07819	Margin	-1.09044	Margin	-1.0268	Margin	-1.01126
cg03298167	2	227372155	IRS1	NM_005544	TSS1500	Island	T2D	Unmethy	-1.97376	Margin	-1.63133	Unmethy	-1.92872	Margin	-1.82018	Margin	-1.60569	Margin	-1.62615	Unmethy	-1.89503	Margin	-1.62315	Unmethy	-1.77726	Unmethy	-2.02739
cg02700894	3	12020449	SYN2;SYN2	NM_133625;NM_003178	TSS1500;TSS1500	N_Shore	T2D	Unmethy	-2.60337	Unmethy	-2.31757	Unmethy	-2.70469	Margin	-1.62034	Margin	-1.78431	Margin	-1.53632	Unmethy	-3.61534	Unmethy	-3.26358	Unmethy	-3.32581	Unmethy	-3.58844
cg15873301	3	12020459	SYN2;SYN2	NM_133625;NM_003178	TSS1500;TSS1500	N_Shore	T2D	Unmethy	-2.41813	Unmethy	-1.81073	Unmethy	-2.13691	Margin	-1.55756	Margin	-1.64204	Margin	-1.28359	Unmethy	-3.12838	Unmethy	-3.05546	Unmethy	-2.84265	Unmethy	-3.3983
cg10245988	3	12021420	SYN2;SYN2	NM_133625;NM_003178	Body;Body	Island	T2D	Unmethy	-2.68091	Unmethy	-2.46258	Unmethy	-2.90309	Unmethy	-2.2012	Unmethy	-2.74134	Margin	-1.3506	Unmethy	-3.3683	Unmethy	-3.25466	Unmethy	-3.43114	Unmethy	-3.55868
cg02102424	3	12021618	SYN2;SYN2	NM_133625;NM_003178	Body;Body	Island	T2D	Margin	-1.79058	Margin	-1.61386	Margin	-1.55407	Margin	-1.38551	Margin	-1.38572	Margin	-1.31787	Unmethy	-2.19838	Unmethy	-2.13375	Unmethy	-2.12154	Unmethy	-2.27422
cg10173186	3	12175427	TIMP4;SYN2;TIMP4;SYN2	NM_003256;NM_133625;NM_003256;NM_003178	1stExon;Body;5'UTR;Body	Island	T2D	Margin	-1.0344	Margin	-0.789734	Margin	-0.447439	Margin	-0.477049	Margin	-0.887829	Margin	-1.14137	Margin	-1.69408	Margin	-1.50333	Unmethy	-1.80221	Unmethy	-1.7081
cg23769143	3	12175667	SYN2;TIMP4;SYN2	NM_133625;NM_003256;NM_003178	Body;TSS200;Body	S_Shore	T2D	Margin	0.278675	Margin	0.537473	Margin	0.716814	Methy	1.12824	Margin	0.847777	Margin	0.700317	Margin	-0.11505	Margin	-0.0736397	Margin	-0.0409124	Margin	-0.129564
cg16791134	3	12175856	TIMP4;SYN2;SYN2	NM_003256;NM_133625;NM_003178	TSS1500;Body;Body	S_Shore	T2D	Methy	1.15851	Methy	1.19593	Margin	0.79989	Margin	0.905339	Methy	1.64192	Methy	1.92197	Methy	1.36942	Methy	1.36084	Methy	1.30976	Methy	1.30998
cg25423174	3	12211303	NA	NA	NA	NA	T2D	Margin	-0.0819398	Margin	0.769542	Margin	0.882683	Margin	0.170506	Margin	0.249401	Margin	0.773774	Methy	1.36596	Margin	-0.736996	Margin	-0.345854	Methy	1.03022
cg04399631	3	12244362	NA	NA	NA	NA	T2D	Methy	1.49077	Methy	1.41036	Methy	2.51245	Methy	2.88152	Methy	2.23995	Methy	2.08178	Margin	-0.985835	Methy	1.31506	Margin	0.735029	Margin	-1.29491
cg01412654	3	12303084	PPARG;PPARG	NM_005037;NM_138712	TSS1500;TSS1500	N_Shore	T2D	Methy	1.10257	Methy	1.7204	Methy	2.57937	Methy	2.90749	Methy	2.4713	Methy	2.6763	Margin	-0.0506019	Margin	0.585885	Margin	0.746177	Methy	1.37109
cg25929976	3	12303656	PPARG;PPARG	NM_005037;NM_138712	TSS1500;TSS1500	N_Shore	T2D	Margin	0.771365	Margin	0.945345	Methy	1.25957	Methy	1.41418	Methy	1.133	Margin	0.887107	Margin	0.36064	Margin	0.392685	Margin	0.535376	Margin	0.441465
cg18063278	3	12303740	PPARG;PPARG	NM_005037;NM_138712	TSS1500;TSS1500	N_Shore	T2D	Methy	1.23812	Methy	1.4407	Methy	1.90021	Methy	1.84341	Methy	1.77772	Methy	1.27089	Methy	0.956018	Methy	0.921383	Margin	0.79398	Margin	0.83076
cg18887186	3	12305332	PPARG;PPARG;PPARG	NM_005037;NM_138711;NM_138712	5'UTR;TSS200;5'UTR	Island	T2D	Unmethy	-2.26293	Unmethy	-2.11147	Unmethy	-2.33221	Margin	-1.95996	Unmethy	-1.93095	Unmethy	-1.99175	Unmethy	-2.51466	Unmethy	-2.57079	Unmethy	-2.45158	Unmethy	-2.434
cg18537222	3	12410731	PPARG;PPARG;PPARG;PPARG	NM_015869;NM_005037;NM_138712;NM_138711	Body;Body;Body;Body	NA	T2D	Margin	0.2633	Methy	1.68611	Methy	3.0313	Methy	3.29743	Methy	2.75747	Methy	3.4092	Unmethy	-2.138	Unmethy	-1.91893	Unmethy	-2.56575	Unmethy	-2.55251
cg10499651	3	12440415	PPARG;PPARG;PPARG;PPARG	NM_015869;NM_005037;NM_138712;NM_138711	Body;Body;Body;Body	NA	T2D	Methy	1.2654	Methy	1.31431	Methy	1.56947	Margin	0.630986	Margin	0.211489	Methy	1.23084	Methy	1.53759	Methy	1.16057	Methy	1.15272	Methy	1.06184
cg08052292	3	56764218	ARHGEF3;ARHGEF3;ARHGEF3	NM_001128616;NM_001128615;NM_019555	Body;Body;Body	NA	RA	Unmethy	-2.77687	Unmethy	-2.21	Margin	-1.37625	Unmethy	-2.50398	Unmethy	-3.29678	Unmethy	-4.12175	Unmethy	-4.05591	Unmethy	-3.48831	Unmethy	-3.86529	Unmethy	-3.95296
cg26319282	3	56784836	ARHGEF3;ARHGEF3;ARHGEF3	NM_001128616;NM_001128615;NM_019555	TSS200;Body;Body	NA	RA	Methy	2.26971	Methy	2.17044	Methy	3.62138	Methy	1.3843	Margin	0.22089	Methy	3.53559	Methy	1.63031	Methy	2.6129	Methy	2.21389	Methy	1.67327
cg12325605	3	56785191	ARHGEF3;ARHGEF3;ARHGEF3	NM_001128615;NM_019555;NM_001128616	Body;Body;TSS1500	NA	RA	Margin	0.669504	Margin	0.991556	Methy	2.43113	Methy	1.49959	Margin	0.56385	Margin	-0.055859	Margin	-0.914447	Margin	0.294529	Margin	0.36322	Margin	0.319481
cg20888995	3	56797099	ARHGEF3;ARHGEF3	NM_001128615;NM_019555	Body;Body	NA	RA	Unmethy	-2.15771	Unmethy	-2.38721	Unmethy	-3.5437	Unmethy	-3.98174	Unmethy	-3.01033	Margin	-0.235573	Unmethy	-3.64689	Unmethy	-2.00336	Unmethy	-1.63609	Margin	-0.863433
cg18482892	3	56808466	ARHGEF3;ARHGEF3	NM_001128615;NM_019555	Body;Body	N_Shelf	RA	Margin	-1.34171	Margin	-1.67877	Unmethy	-2.81838	Unmethy	-3.16936	Unmethy	-2.54449	Margin	-0.76516	Margin	-0.74614	Margin	-1.01083	Margin	-1.04392	Margin	-0.820608
cg01016119	3	56810322	ARHGEF3;ARHGEF3	NM_001128615;NM_019555	Body;Body	N_Shore	RA	Margin	0.50742	Margin	-0.453678	Unmethy	-2.21357	Unmethy	-3.78536	Unmethy	-2.5008	Margin	-1.35055	Methy	0.854217	Methy	1.03949	Methy	0.95242	Methy	0.879225
cg26311262	3	56833079	ARHGEF3	NM_001128615	Body	NA	RA	Margin	-0.361117	Margin	0.489296	Methy	1.03457	Methy	1.39469	Margin	0.799033	Margin	0.00817216	Margin	-1.16927	Margin	-1.27733	Margin	-1.14794	Unmethy	-1.73251
cg16451527	3	56864835	ARHGEF3	NM_001128615	Body	NA	RA	Margin	0.194986	Methy	1.54505	Methy	2.78445	Methy	3.08071	Methy	2.47341	Methy	2.68898	Margin	-0.427595	Margin	-1.06555	Margin	-0.815907	Margin	0.214707
cg11229273	3	56990141	ARHGEF3	NM_001128615	Body	NA	RA	Margin	-0.937259	Margin	0.249771	Methy	1.10226	Margin	0.893814	Margin	0.0477287	Margin	1.16048	Unmethy	-3.15001	Unmethy	-2.75243	Unmethy	-2.71761	Unmethy	-1.8491
cg10913077	3	57055704	ARHGEF3	NM_001128615	5'UTR	NA	RA	Methy	1.26437	Margin	0.799564	Margin	0.666762	Margin	0.0760985	Margin	-0.0271866	Margin	0.23149	Methy	1.79691	Methy	1.90998	Methy	1.99804	Methy	1.63494
cg04563996	3	57068559	ARHGEF3;SPATA12	NM_001128615;NM_181727	5'UTR;TSS1500	NA	RA	Margin	-1.3322	Margin	-0.494325	Margin	0.219109	Margin	0.601089	Margin	-0.141834	Margin	-0.92386	Unmethy	-2.4237	Unmethy	-2.11811	Unmethy	-2.38807	Unmethy	-2.94247
cg20749059	3	57069444	ARHGEF3;SPATA12	NM_001128615;NM_181727	5'UTR;TSS200	NA	RA	Unmethy	-2.02173	Unmethy	-1.77627	Unmethy	-1.72415	Margin	-1.58119	Margin	-1.031	Margin	-1.58012	Unmethy	-3.09322	Unmethy	-2.5852	Unmethy	-2.67558	Unmethy	-3.10863
cg13745870	3	57069803	SPATA12;ARHGEF3;SPATA12	NM_181727;NM_001128615;NM_181727	1stExon;5'UTR;5'UTR	NA	RA	Margin	0.803363	Methy	1.08602	Methy	1.52881	Methy	1.56298	Methy	1.46534	Methy	2.11749	Margin	-0.791329	Margin	0.338906	Margin	0.440941	Margin	0.819012
cg25799109	3	57077940	ARHGEF3;SPATA12	NM_001128615;NM_181727	5'UTR;5'UTR	NA	RA	Margin	-0.194683	Margin	0.478425	Methy	1.61766	Margin	0.893591	Margin	-0.169087	Unmethy	-2.09126	Margin	-0.33109	Margin	-1.00299	Margin	-0.644849	Margin	-0.587248
cg02031326	3	57087085	ARHGEF3	NM_001128615	5'UTR	N_Shore	RA	Methy	2.04143	Methy	2.02971	Methy	1.77003	Methy	2.3652	Methy	2.19344	Methy	2.49107	Methy	2.00342	Methy	1.9701	Methy	1.28436	Unmethy	-1.61208
cg24634060	3	57087423	ARHGEF3	NM_001128615	5'UTR	N_Shore	RA	Unmethy	-2.45194	Unmethy	-2.05716	Unmethy	-2.07354	Margin	-1.37683	Margin	-1.30247	Unmethy	-2.72208	Unmethy	-3.13189	Unmethy	-3.00452	Unmethy	-3.10019	Unmethy	-3.20229
cg15572396	3	58296389	PXK	NM_017771	Body	S_Shelf	RA,SLE	Margin	-0.347416	Methy	1.03334	Methy	2.71859	Methy	3.2264	Methy	2.5332	Margin	0.769938	Margin	-1.47884	Unmethy	-2.12405	Unmethy	-2.65325	Unmethy	-3.60695
cg24175188	3	58349963	PXK	NM_017771	Body	NA	RA,SLE	Margin	0.228156	Methy	1.64109	Methy	2.80305	Methy	3.42	Methy	2.75892	Methy	1.81184	Margin	-1.00201	Margin	-1.26136	Margin	-1.39098	Margin	-0.368528
cg23549972	3	58364694	PXK	NM_017771	Body	NA	RA,SLE	Methy	1.42718	Margin	0.505762	Margin	-1.38373	Margin	-1.99227	Margin	-0.335798	Margin	0.233827	Methy	2.50584	Methy	2.39713	Methy	2.42808	Methy	2.39045
cg25158772	3	58373769	PXK	NM_017771	Body	NA	RA,SLE	Methy	2.8501	Methy	3.1914	Methy	3.32638	Methy	3.32473	Methy	3.16037	Methy	3.52871	Methy	2.84299	Methy	2.27593	Methy	1.44642	Margin	-0.0430014
cg18194655	3	58375145	PXK	NM_017771	Body	NA	RA,SLE	Methy	3.00498	Methy	2.80408	Methy	3.29904	Methy	2.69281	Methy	3.07941	Methy	2.39222	Methy	2.80128	Methy	2.72467	Methy	2.56328	Margin	0.481546
cg07075085	3	64547769	ADAMTS9	NM_182920	Body	NA	T2D	Methy	1.2629	Methy	1.00151	Margin	0.945398	Margin	0.560422	Margin	0.469897	Margin	0.63449	Methy	1.08576	Methy	1.06547	Methy	1.17692	Methy	1.20472
cg07891473	3	64645680	ADAMTS9	NM_182920	Body	N_Shore	T2D	Unmethy	-2.05898	Unmethy	-2.07026	Unmethy	-2.01928	Margin	-1.77182	Margin	-1.56018	Margin	-1.61174	Unmethy	-2.46161	Unmethy	-2.35167	Unmethy	-2.32628	Unmethy	-2.48858
cg21938436	3	64646025	ADAMTS9	NM_182920	Body	N_Shore	T2D	Margin	-1.71322	Margin	-1.44238	Margin	-1.28871	Margin	-0.870471	Margin	-1.00252	Margin	-0.919759	Unmethy	-2.63134	Unmethy	-2.56063	Unmethy	-2.54147	Unmethy	-2.71657
cg03427905	3	64646418	ADAMTS9	NM_182920	Body	Island	T2D	Unmethy	-2.4471	Unmethy	-1.89987	Unmethy	-1.85765	Margin	-1.34079	Margin	-1.41294	Margin	-1.46612	Unmethy	-3.10626	Unmethy	-2.97591	Unmethy	-3.01038	Unmethy	-3.22448
cg12478384	3	64646804	ADAMTS9	NM_182920	Body	Island	T2D	Unmethy	-3.01821	Unmethy	-2.23281	Unmethy	-2.23915	Margin	-1.67607	Margin	-1.81114	Margin	-1.6054	Unmethy	-3.84919	Unmethy	-3.84265	Unmethy	-3.95389	Unmethy	-4.07449
cg23078228	3	64686424	MIR548A2	NR_030317	Body	NA	T2D	Methy	1.6658	Methy	1.4767	Methy	1.14361	Margin	0.750915	Margin	0.834467	Methy	1.19917	Methy	1.79328	Methy	1.81921	Methy	1.81015	Methy	1.78543
cg25366141	3	64757564	MIR548A2	NR_030317	Body	NA	T2D	Unmethy	-2.43053	Unmethy	-1.82732	Margin	-1.64244	Margin	-1.66879	Margin	-1.75841	Margin	-1.4229	Unmethy	-2.65049	Unmethy	-2.8936	Unmethy	-2.71983	Unmethy	-2.82915
cg21324884	3	64776369	MIR548A2	NR_030317	Body	NA	T2D	Methy	1.76811	Methy	1.54489	Methy	1.20252	Margin	0.840365	Margin	0.964481	Margin	1.0105	Methy	2.3487	Methy	2.01008	Methy	2.2574	Methy	2.21581
cg05509179	3	64862820	MIR548A2	NR_030317	Body	NA	T2D	Methy	1.08799	Methy	1.05848	Margin	0.571036	Margin	0.30618	Margin	0.663562	Margin	0.911205	Methy	1.55329	Methy	1.38395	Methy	1.62804	Methy	1.77098
cg02917236	3	64878226	MIR548A2	NR_030317	Body	NA	T2D	Methy	1.11061	Margin	0.83552	Margin	0.559072	Margin	0.0195698	Margin	0.221902	Margin	0.33293	Methy	1.29024	Methy	1.20172	Methy	1.41479	Methy	1.55879
cg22931622	3	65104195	NA	NA	NA	NA	T2D	Methy	1.79267	Methy	1.43643	Methy	1.35908	Margin	0.872471	Margin	0.850212	Margin	1.1374	Methy	1.9314	Methy	1.8178	Methy	1.88331	Methy	1.93355
cg18649464	3	65156972	NA	NA	NA	NA	T2D	Methy	1.08553	Margin	0.910432	Margin	0.713638	Margin	0.32136	Margin	0.192703	Margin	0.642571	Methy	1.07577	Methy	1.14446	Methy	1.18359	Methy	1.07232
cg00697916	3	65317684	MAGI1;MAGI1	NM_001033057;NM_015520	Body;3'UTR	Island	T2D	Margin	-1.52857	Margin	-1.40702	Margin	-1.35531	Margin	-1.34023	Margin	-1.24427	Margin	-1.10561	Margin	-1.82263	Margin	-1.63014	Unmethy	-1.65297	Unmethy	-1.63208
cg14533390	3	65317883	MAGI1;MAGI1	NM_015520;NM_001033057	Body;Body	Island	T2D	Margin	-1.49359	Margin	-1.15247	Margin	-1.31125	Margin	-1.13937	Margin	-1.37092	Margin	-0.962856	Margin	-1.50852	Margin	-1.30703	Unmethy	-1.7281	Margin	-1.44073
cg16177445	3	65444986	MAGI1;MAGI1;MAGI1	NM_015520;NM_001033057;NM_004742	Body;Body;Body	NA	T2D	Margin	0.689442	Margin	0.616546	Margin	0.527683	Margin	0.0603691	Margin	0.141498	Margin	0.472798	Methy	0.892342	Methy	1.06421	Methy	1.12614	Methy	1.34555
cg17251609	3	65464614	MAGI1;MAGI1;MAGI1	NM_015520;NM_001033057;NM_004742	Body;Body;Body	NA	T2D	Methy	1.68155	Methy	1.25592	Methy	1.22803	Margin	0.818607	Margin	0.493924	Margin	1.15152	Methy	1.8173	Methy	1.95763	Methy	2.10343	Methy	1.88533
cg14412322	3	65509725	MAGI1;MAGI1;MAGI1	NM_015520;NM_001033057;NM_004742	Body;Body;Body	Island	T2D	Margin	-1.5268	Margin	-1.14252	Margin	-1.22052	Margin	-0.66156	Margin	-0.882602	Margin	-0.285233	Unmethy	-2.10609	Unmethy	-2.04064	Unmethy	-2.15812	Unmethy	-2.27517
cg21655915	3	65510287	MAGI1;MAGI1;MAGI1	NM_015520;NM_001033057;NM_004742	Body;Body;Body	Island	T2D	Margin	-1.74202	Margin	-1.44539	Margin	-1.57834	Margin	-1.18287	Margin	-1.31768	Margin	-0.906566	Unmethy	-2.51747	Unmethy	-2.27768	Unmethy	-2.38472	Unmethy	-2.49998
cg18060999	3	65511470	MAGI1;MAGI1;MAGI1	NM_015520;NM_001033057;NM_004742	Body;Body;Body	S_Shore	T2D	Methy	1.88142	Methy	1.76016	Methy	1.4789	Margin	0.687822	Methy	1.16535	Methy	1.19557	Methy	2.22484	Methy	2.05679	Methy	2.38879	Methy	2.46803
cg06329316	3	65542166	MAGI1;MAGI1;MAGI1	NM_015520;NM_001033057;NM_004742	Body;Body;Body	NA	T2D	Methy	2.20771	Methy	1.71806	Methy	2.51913	Methy	2.80406	Methy	2.18626	Margin	0.986854	Margin	0.21705	Methy	2.54445	Methy	2.42117	Methy	2.29229
cg17580935	3	65558280	MAGI1;MAGI1;MAGI1	NM_015520;NM_001033057;NM_004742	Body;Body;Body	NA	T2D	Unmethy	-3.31451	Unmethy	-2.82448	Unmethy	-3.07216	Margin	-1.93314	Unmethy	-2.44214	Unmethy	-2.03254	Unmethy	-4.11331	Unmethy	-4.10006	Unmethy	-4.15781	Unmethy	-4.41075
cg21550580	3	65730422	MAGI1;MAGI1;MAGI1	NM_015520;NM_001033057;NM_004742	Body;Body;Body	NA	T2D	Methy	1.04656	Margin	0.515049	Margin	0.242227	Margin	-0.182538	Margin	-0.0743284	Margin	0.12956	Methy	1.31325	Methy	1.22719	Methy	1.29618	Methy	1.15345
cg08023852	3	65839421	MAGI1;MAGI1;MAGI1	NM_015520;NM_001033057;NM_004742	Body;Body;Body	NA	T2D	Methy	1.45018	Methy	1.26018	Margin	0.825759	Margin	0.62574	Margin	0.572028	Methy	1.20981	Methy	1.70056	Methy	1.77971	Methy	1.71062	Methy	1.55552
cg03845962	3	65855306	MAGI1;MAGI1;MAGI1	NM_015520;NM_001033057;NM_004742	Body;Body;Body	NA	T2D	Methy	1.91969	Methy	1.5906	Methy	1.33695	Margin	0.769282	Margin	0.902739	Margin	1.13054	Methy	2.0938	Methy	2.43876	Methy	2.22903	Methy	2.21937
cg10964627	3	65960444	MAGI1;MAGI1;MAGI1	NM_015520;NM_001033057;NM_004742	Body;Body;Body	NA	T2D	Methy	1.13835	Margin	0.95699	Margin	0.71597	Margin	0.269708	Margin	0.164943	Margin	0.866236	Methy	1.40762	Methy	1.27851	Methy	1.11326	Margin	0.504418
cg25338423	3	65998197	MAGI1;MAGI1;MAGI1	NM_015520;NM_001033057;NM_004742	Body;Body;Body	N_Shore	T2D	Unmethy	-2.02968	Unmethy	-1.8987	Unmethy	-1.85858	Margin	-1.71764	Unmethy	-1.95536	Margin	-1.74008	Unmethy	-2.37856	Unmethy	-2.34086	Unmethy	-2.23841	Unmethy	-2.29129
cg21547982	3	65998520	MAGI1;MAGI1;MAGI1	NM_015520;NM_001033057;NM_004742	Body;Body;Body	Island	T2D	Unmethy	-2.20731	Unmethy	-1.9337	Unmethy	-1.92143	Margin	-1.58529	Margin	-1.71006	Margin	-1.67871	Unmethy	-2.74919	Unmethy	-2.74496	Unmethy	-2.8211	Unmethy	-2.78166
cg10009157	3	66000626	MAGI1;MAGI1;MAGI1	NM_001033057;NM_004742;NM_015520	TSS1500;TSS1500;TSS1500	Island	T2D	Unmethy	-2.12194	Unmethy	-1.8834	Unmethy	-1.95903	Margin	-2.02491	Unmethy	-1.92097	Margin	-1.73617	Unmethy	-2.3218	Unmethy	-2.29719	Unmethy	-2.33482	Unmethy	-2.32852
cg04357717	3	103638762	ZPLD1	NM_175056	Body	NA	T2D	Margin	0.339081	Margin	0.780285	Methy	1.03257	Margin	0.554321	Margin	0.365036	Margin	1.0149	Margin	0.356993	Margin	0.341577	Margin	0.434463	Margin	0.24098
cg20824294	3	143798772	PLS1	NM_001145319	5'UTR	S_Shore	T2D	Margin	0.466374	Margin	0.459169	Margin	0.727125	Methy	1.09939	Margin	0.684248	Margin	0.43103	Margin	0.0100882	Margin	0.0434086	Margin	0.0143291	Margin	0.149181
cg14508517	3	176204819	NAALADL2	NM_207015	Body	NA	SLE	Methy	1.12838	Methy	1.13668	Margin	0.927777	Margin	0.520192	Margin	0.442726	Margin	0.703465	Methy	1.09584	Methy	1.17752	Methy	1.57738	Methy	1.40989
cg01379656	3	176453390	NAALADL2	NM_207015	Body	NA	SLE	Methy	1.50564	Margin	0.851606	Margin	-0.0527988	Margin	-0.388961	Margin	0.0358472	Methy	1.88274	Methy	2.08939	Methy	2.1893	Methy	2.26778	Methy	2.30547
cg09890077	3	176539346	NAALADL2	NM_207015	Body	NA	SLE	Methy	1.4817	Methy	1.35464	Methy	1.07878	Margin	0.667471	Margin	0.647357	Margin	1.04091	Methy	1.85293	Methy	1.65228	Methy	1.72338	Methy	1.68739
cg14250740	3	176727290	NAALADL2	NM_207015	Body	NA	SLE	Unmethy	-1.89843	Unmethy	-2.07616	Unmethy	-2.08954	Margin	-2.03921	Unmethy	-2.39725	Unmethy	-2.15096	Unmethy	-2.44765	Unmethy	-2.24497	Unmethy	-2.59397	Unmethy	-2.67215
cg23499115	3	181073500	PEX5L	NM_016559	Body	NA	T2D	Methy	0.992946	Methy	1.40361	Methy	1.41279	Methy	1.36822	Methy	1.12026	Margin	0.680079	Methy	0.774821	Methy	0.884163	Methy	1.10841	Methy	1.07028
cg23463008	3	181081374	PEX5L	NM_016559	Body	NA	T2D	Methy	2.87396	Methy	2.73018	Methy	3.19997	Methy	2.87506	Methy	2.58323	Margin	0.994589	Methy	2.57928	Methy	2.56799	Methy	2.53324	Methy	2.47851
cg06508320	3	181142843	PEX5L	NM_016559	Body	NA	T2D	Unmethy	-2.67882	Unmethy	-2.09911	Margin	-1.58132	Margin	-1.65311	Unmethy	-2.41774	Unmethy	-2.7663	Unmethy	-3.6011	Unmethy	-3.53132	Unmethy	-3.5033	Unmethy	-3.69526
cg13141009	3	181142918	PEX5L	NM_016559	Body	NA	T2D	Unmethy	-2.2981	Margin	-1.66274	Margin	-1.33088	Margin	-1.04196	Unmethy	-2.20319	Margin	-1.68267	Unmethy	-3.74329	Unmethy	-3.72549	Unmethy	-3.68493	Unmethy	-3.79557
cg05131623	3	181237979	PEX5L	NM_016559	TSS1500	S_Shore	T2D	Unmethy	-1.97392	Unmethy	-1.76692	Margin	-1.646	Margin	-1.47246	Margin	-1.23362	Margin	-1.57338	Unmethy	-2.20373	Unmethy	-2.10224	Unmethy	-1.99337	Unmethy	-2.15027
cg06150454	3	186847564	IGF2BP2;IGF2BP2	NM_001007225;NM_006548	Body;Body	NA	T2D	Margin	-0.833429	Margin	-0.523404	Margin	-0.138366	Margin	-0.220903	Margin	-0.220905	Margin	-0.731287	Margin	-1.32806	Margin	-1.4847	Margin	-1.28688	Unmethy	-1.58011
cg06374097	3	186903090	IGF2BP2;IGF2BP2	NM_001007225;NM_006548	Body;Body	NA	T2D	Margin	0.873189	Methy	1.02008	Methy	1.17946	Methy	1.15725	Methy	1.24353	Margin	0.709274	Margin	0.607523	Methy	0.816157	Methy	0.979109	Methy	1.05545
cg18464903	3	186946776	IGF2BP2;IGF2BP2	NM_001007225;NM_006548	Body;Body	NA	T2D	Methy	0.956479	Methy	1.46726	Methy	2.06088	Methy	1.38149	Methy	1.33735	Methy	2.25874	Methy	0.692282	Margin	0.485361	Margin	0.667394	Methy	1.34518
cg23956648	3	186961929	IGF2BP2;IGF2BP2	NM_001007225;NM_006548	Body;Body	NA	T2D	Margin	0.781934	Methy	1.25569	Methy	2.42128	Methy	2.3134	Methy	1.8049	Methy	1.62545	Margin	-0.0239998	Margin	-0.176439	Margin	0.124519	Margin	0.0831092
cg08797864	3	187013952	IGF2BP2;IGF2BP2	NM_001007225;NM_006548	Body;Body	NA	T2D	Methy	1.16584	Methy	1.25693	Methy	1.61115	Methy	1.18729	Methy	1.03824	Methy	1.89252	Margin	-0.739346	Methy	1.15621	Methy	1.2706	Methy	2.73328
cg24960291	3	187021586	IGF2BP2;IGF2BP2	NM_001007225;NM_006548	Body;Body	N_Shelf	T2D	Margin	0.842655	Methy	1.37576	Methy	1.8056	Methy	2.25375	Methy	2.26823	Margin	0.885085	Margin	0.28863	Margin	0.409237	Margin	0.509669	Margin	-0.0705017
cg05576949	3	187023025	IGF2BP2;IGF2BP2	NM_001007225;NM_006548	Body;Body	N_Shore	T2D	Methy	1.00547	Methy	1.55615	Methy	2.17117	Methy	2.50307	Methy	2.13521	Methy	1.31997	Margin	0.159055	Margin	0.521022	Margin	0.300909	Margin	-0.100124
cg12781915	3	187026793	IGF2BP2;IGF2BP2	NM_006548;NM_001007225	TSS1500;TSS1500	Island	T2D	Margin	-1.47871	Margin	-1.00947	Margin	-0.60251	Margin	-0.375701	Margin	-0.739198	Margin	-1.0505	Unmethy	-2.35442	Unmethy	-2.3595	Unmethy	-2.43607	Unmethy	-2.34331
cg06411479	4	6323130	WFS1;WFS1	NM_001145853;NM_006005	5'UTR;5'UTR	S_Shore	T2D	Unmethy	-1.91048	Unmethy	-1.98621	Unmethy	-1.84868	Unmethy	-2.10613	Margin	-1.86771	Unmethy	-1.78592	Unmethy	-2.0799	Unmethy	-2.18013	Unmethy	-2.08306	Unmethy	-2.09322
cg25311466	4	6328174	WFS1;WFS1	NM_001145853;NM_006005	5'UTR;5'UTR	NA	T2D	Methy	1.54321	Methy	1.28412	Methy	1.68988	Methy	1.20172	Methy	1.12052	Unmethy	-2.81339	Methy	1.87144	Methy	1.69237	Methy	1.87961	Methy	1.74839
cg00701064	4	6331315	WFS1;WFS1	NM_006005;NM_001145853	Body;Body	NA	T2D	Margin	-0.335589	Margin	0.416252	Margin	0.966621	Methy	1.10172	Margin	0.579488	Margin	0.636098	Unmethy	-2.35833	Margin	-1.62471	Unmethy	-2.48834	Unmethy	-2.81251
cg16417416	4	6334932	WFS1;WFS1	NM_006005;NM_001145853	Body;Body	NA	T2D	Margin	0.575985	Methy	1.42376	Methy	1.87976	Methy	2.09428	Methy	1.86511	Methy	2.46665	Margin	-0.209628	Margin	-0.00724035	Margin	-0.0228549	Margin	-0.490774
cg17086759	4	6354594	WFS1;WFS1	NM_006005;NM_001145853	Body;Body	Island	T2D	Methy	6.17516	Unmethy	5.99404	Unmethy	6.29932	Unmethy	6.08698	Unmethy	6.28357	Methy	6.22226	Methy	6.02081	Methy	6.03038	Unmethy	6.4647	Unmethy	6.39887
cg06079509	4	6354943	WFS1;WFS1	NM_006005;NM_001145853	Body;Body	Island	T2D	Methy	1.86111	Methy	1.66758	Methy	1.29475	Margin	0.863726	Methy	1.08062	Methy	1.46662	Methy	2.16049	Methy	2.01719	Methy	2.27292	Methy	2.34493
cg06812693	4	25932344	RBPJ;RBPJ;RBPJ;RBPJ	NM_203283;NM_015874;NM_203284;NM_005349	Body;Body;5'UTR;Body	S_Shore	RA	Margin	-1.34772	Margin	-1.49354	Margin	-1.42312	Margin	-1.30472	Margin	-1.46745	Margin	-1.40674	Margin	-1.31274	Margin	-1.37328	Unmethy	-1.57062	Unmethy	-1.5484
cg26924822	4	25941861	RBPJ;RBPJ;RBPJ;RBPJ	NM_203283;NM_015874;NM_203284;NM_005349	Body;Body;5'UTR;Body	NA	RA	Margin	0.133206	Methy	1.43972	Methy	1.67004	Methy	1.93131	Methy	2.018	Methy	1.85536	Methy	0.79528	Margin	-0.802139	Margin	-1.11672	Unmethy	-2.03982
cg22992279	4	26023999	RBPJ;RBPJ;RBPJ;RBPJ	NM_203284;NM_203283;NM_015874;NM_005349	Body;Body;Body;Body	NA	RA	Margin	0.797358	Methy	2.43189	Methy	2.99133	Methy	2.78438	Methy	2.63326	Methy	3.02061	Methy	2.53565	Margin	-0.597225	Margin	-0.134688	Methy	1.15175
cg14855874	4	102931420	BANK1;BANK1	NM_001127507;NM_017935	Body;Body	S_Shore	SLE	Unmethy	-2.45195	Unmethy	-1.84002	Unmethy	-1.95462	Margin	-1.56506	Margin	-1.13674	Unmethy	-3.38368	Unmethy	-3.11784	Unmethy	-3.03324	Unmethy	-3.11897	Unmethy	-3.21215
cg01116491	4	102934162	BANK1;BANK1	NM_001127507;NM_017935	Body;Body	S_Shelf	SLE	Methy	2.70855	Methy	3.38125	Methy	3.9568	Methy	3.45648	Methy	3.6561	Margin	0.916483	Methy	3.35924	Methy	2.73405	Methy	2.84844	Methy	2.56811
cg23730277	4	102953775	BANK1;BANK1;BANK1	NM_001127507;NM_001083907;NM_017935	Body;TSS1500;Body	NA	SLE	Methy	3.2162	Methy	2.93487	Methy	3.65769	Methy	3.37774	Methy	3.1295	Margin	-1.7107	Methy	3.44563	Methy	3.47428	Methy	3.14477	Methy	3.09884
cg21997986	4	102964437	BANK1;BANK1;BANK1	NM_001127507;NM_017935;NM_001083907	Body;Body;5'UTR	NA	SLE	Methy	2.84675	Methy	2.41758	Methy	2.97499	Methy	2.5769	Methy	2.85281	Margin	-1.62145	Methy	2.75833	Methy	2.99156	Methy	2.96403	Methy	2.02386
cg26396815	4	103097155	BANK1;BANK1;BANK1	NM_001127507;NM_001083907;NM_017935	Body;Body;Body	NA	SLE	Methy	2.83475	Methy	3.0435	Methy	3.38909	Methy	3.23532	Methy	3.4099	Methy	3.71698	Methy	3.269	Methy	2.73932	Methy	1.49696	Margin	-1.25767
cg16605743	4	109907460	NA	NA	NA	S_Shelf	SLE	Methy	1.91146	Methy	1.80265	Methy	1.64857	Methy	1.06409	Margin	0.569787	Methy	1.9951	Methy	1.96658	Methy	2.1913	Methy	2.33081	Methy	2.39955
cg01401762	4	109928021	NA	NA	NA	NA	SLE	Margin	0.657039	Margin	0.607612	Margin	0.567174	Margin	0.271309	Margin	0.334694	Margin	0.628666	Methy	0.778915	Methy	0.743062	Margin	0.780182	Margin	0.730752
cg03757387	4	109990357	COL25A1;COL25A1	NM_198721;NM_032518	Body;Body	NA	SLE	Margin	-1.59699	Margin	-1.38853	Margin	-1.07888	Margin	-0.652553	Margin	-1.09135	Unmethy	-2.43234	Unmethy	-1.98063	Unmethy	-2.07851	Unmethy	-2.06308	Unmethy	-2.33955
cg22778014	4	110031434	COL25A1;COL25A1	NM_198721;NM_032518	Body;Body	NA	SLE	Methy	1.34547	Methy	1.19994	Methy	1.18205	Margin	0.453491	Margin	0.396017	Margin	0.898149	Methy	1.54769	Methy	1.45353	Methy	1.58872	Methy	1.62722
cg01150943	4	110051950	COL25A1;COL25A1	NM_198721;NM_032518	Body;Body	NA	SLE	Methy	1.47966	Methy	2.07873	Methy	2.58895	Methy	2.54588	Methy	2.76169	Methy	2.77018	Margin	0.646366	Methy	0.749806	Margin	0.81619	Methy	0.930193
cg18770452	4	110125069	COL25A1;COL25A1	NM_198721;NM_032518	Body;Body	NA	SLE	Margin	0.794613	Margin	0.954613	Methy	1.0478	Methy	1.16851	Methy	1.13146	Margin	1.04383	Methy	0.848206	Methy	0.741182	Margin	0.881878	Methy	0.924121
cg21041751	4	110153145	COL25A1;COL25A1	NM_198721;NM_032518	Body;Body	NA	SLE	Margin	0.729242	Margin	0.86558	Margin	0.940285	Methy	1.0193	Margin	0.830778	Margin	1.06737	Margin	0.526202	Margin	0.599695	Margin	0.629904	Margin	0.649614
cg01734045	4	110186984	COL25A1;COL25A1	NM_198721;NM_032518	Body;Body	NA	SLE	Margin	-1.19536	Margin	-0.401738	Margin	0.552889	Margin	0.51686	Margin	-0.551665	Margin	-1.21573	Unmethy	-3.70031	Unmethy	-2.95507	Unmethy	-3.11336	Unmethy	-3.41052
cg08760493	4	110213488	COL25A1;COL25A1	NM_198721;NM_032518	Body;Body	NA	SLE	Margin	-0.355839	Margin	0.893208	Methy	2.37265	Methy	2.79266	Methy	1.73663	Methy	2.56602	Unmethy	-2.35381	Unmethy	-1.9817	Unmethy	-1.71853	Margin	-0.789102
cg26442903	4	110326517	COL25A1;COL25A1	NM_198721;NM_032518	Body;Body	NA	SLE	Methy	1.29395	Methy	1.04304	Margin	0.876651	Margin	0.299416	Margin	0.307237	Margin	0.711356	Methy	1.87152	Methy	1.35724	Methy	1.63805	Methy	1.64266
cg11165912	4	110439512	COL25A1;COL25A1	NM_198721;NM_032518	Body;Body	N_Shelf	SLE	Margin	-1.62092	Margin	-1.33156	Margin	-0.727584	Margin	-1.18297	Margin	-0.947706	Margin	-1.56284	Unmethy	-2.09714	Unmethy	-2.03704	Unmethy	-1.7971	Unmethy	-1.95476
cg01344273	4	110442489	COL25A1;COL25A1	NM_198721;NM_032518	Body;Body	Island	SLE	Unmethy	-2.00296	Unmethy	-1.86695	Unmethy	-1.79298	Margin	-1.85487	Unmethy	-2.01818	Margin	-1.38982	Unmethy	-2.22702	Unmethy	-2.26437	Unmethy	-2.11295	Unmethy	-2.19619
cg19039028	4	110442878	COL25A1;COL25A1;COL25A1;COL25A1	NM_198721;NM_198721;NM_032518;NM_032518	1stExon;5'UTR;5'UTR;1stExon	Island	SLE	Unmethy	-2.17242	Unmethy	-2.04063	Unmethy	-2.12224	Unmethy	-2.16201	Unmethy	-2.21522	Margin	-1.64049	Unmethy	-2.1265	Unmethy	-2.08531	Unmethy	-2.144	Unmethy	-2.11665
cg22266749	4	110443408	COL25A1;COL25A1	NM_032518;NM_198721	TSS200;TSS200	Island	SLE	Unmethy	-2.36636	Unmethy	-2.35704	Unmethy	-2.08152	Margin	-1.7555	Unmethy	-2.08548	Margin	-1.73671	Unmethy	-2.3007	Unmethy	-2.59504	Unmethy	-2.3119	Unmethy	-2.3827
cg09926747	4	110443696	COL25A1;COL25A1	NM_198721;NM_032518	TSS1500;TSS1500	Island	SLE	Unmethy	-2.13143	Unmethy	-1.95621	Unmethy	-2.22277	Margin	-1.81194	Margin	-1.77126	Margin	-1.32783	Unmethy	-2.39476	Unmethy	-2.3803	Unmethy	-2.40368	Unmethy	-2.49829
cg10583651	4	123758419	IL21	NM_021803	Body	NA	RA	Methy	2.22102	Methy	1.8539	Margin	0.54559	Methy	1.70514	Methy	2.36564	Methy	2.98358	Methy	2.9535	Methy	2.78699	Methy	3.02635	Methy	2.91456
cg00136405	4	123761648	IL21;IL21	NM_021803;NM_021803	5'UTR;1stExon	NA	RA	Methy	1.50843	Methy	1.29941	Margin	0.81463	Margin	0.849494	Margin	0.847887	Methy	1.40976	Methy	2.23657	Methy	1.74519	Methy	1.92937	Methy	2.07319
cg11591520	4	123761850	IL21	NM_021803	TSS200	NA	RA	Methy	2.44865	Methy	1.81783	Margin	0.781838	Methy	1.03114	Methy	1.37802	Methy	1.33348	Methy	3.38014	Methy	2.64835	Methy	2.95213	Methy	2.89389
cg25540078	4	144321457	NA	NA	NA	N_Shelf	Asthma	Margin	0.712163	Methy	1.1553	Methy	1.08216	Methy	0.92033	Methy	1.2474	Margin	1.14337	Methy	0.695684	Margin	0.568941	Margin	0.881513	Methy	0.902319
cg01719995	4	144324343	USP38	NM_032557	TSS1500	N_Shore	Asthma	Margin	-0.992479	Margin	0.0686823	Margin	-0.0296466	Methy	1.55303	Methy	1.67846	Margin	1.10521	Unmethy	-2.20396	Unmethy	-2.71647	Unmethy	-2.99392	Unmethy	-3.43987
cg22650648	4	144476553	GAB1;GAB1	NM_002039;NM_207123	TSS1500;TSS1500	Island	Asthma	Unmethy	-1.9937	Unmethy	-2.47272	Unmethy	-2.15807	Margin	-1.87772	Unmethy	-2.06754	Unmethy	-2.23199	Unmethy	-2.24188	Unmethy	-2.39924	Unmethy	-2.51817	Unmethy	-2.51826
cg12982893	4	144492166	GAB1;GAB1	NM_002039;NM_207123	Body;Body	NA	Asthma	Methy	5.86337	Margin	5.95711	Methy	5.58824	Methy	5.31725	Methy	5.37296	Methy	5.61265	Methy	5.19082	Methy	5.71347	Methy	5.92278	Methy	5.67309
cg17453767	4	144497246	GAB1;GAB1	NM_002039;NM_207123	Body;Body	NA	Asthma	Methy	3.41682	Methy	3.05324	Methy	3.58492	Methy	3.08999	Methy	2.92374	Margin	0.0596825	Methy	3.60098	Methy	3.11427	Methy	3.25821	Methy	2.87394
cg06855485	4	144522458	GAB1;GAB1	NM_002039;NM_207123	Body;Body	NA	Asthma	Methy	1.35659	Methy	1.82372	Methy	2.44022	Methy	2.67268	Methy	2.10866	Methy	1.80672	Margin	0.587298	Methy	0.734346	Margin	0.882523	Margin	0.619291
cg01736356	4	164685239	MARCH1;MARCH1	NM_001166373;NM_017923	Body;Body	NA	T2D	Unmethy	-2.51277	Unmethy	-1.89431	Margin	-1.43417	Unmethy	-2.10074	Unmethy	-2.59363	Unmethy	-2.72561	Unmethy	-2.95942	Unmethy	-2.63275	Unmethy	-2.96318	Unmethy	-2.9815
cg16423499	4	164751983	MARCH1;MARCH1	NM_001166373;NM_017923	Body;Body	NA	T2D	Margin	-1.51013	Margin	-0.841759	Margin	-0.11095	Margin	-0.43478	Margin	-0.785793	Unmethy	-2.53247	Unmethy	-2.74004	Unmethy	-2.41378	Unmethy	-2.65576	Unmethy	-2.85437
cg15498306	4	164754091	MARCH1;MARCH1	NM_001166373;NM_017923	Body;1stExon	NA	T2D	Unmethy	-2.63607	Unmethy	-2.21639	Margin	-1.59169	Unmethy	-2.15478	Unmethy	-2.45662	Unmethy	-3.02986	Unmethy	-3.24899	Unmethy	-3.0534	Unmethy	-2.99684	Unmethy	-3.06626
cg05493407	4	165036069	2001-03-01	NM_001166373	5'UTR	NA	T2D	Margin	0.866345	Margin	0.671394	Margin	0.725699	Margin	0.260768	Margin	-0.0973186	Methy	1.26811	Methy	0.871512	Methy	1.14009	Margin	0.38135	Margin	0.838592
cg13078134	4	165328928	2001-03-01	NM_001166373	5'UTR	Island	T2D	Methy	6.45986	Unmethy	7.05991	Unmethy	6.60539	Unmethy	6.49823	Unmethy	6.38287	Methy	6.55	Methy	6.2278	Methy	6.06292	Margin	6.14587	Margin	6.19678
cg08748033	4	165330822	2001-03-01	NM_001166373	5'UTR	S_Shore	T2D	Methy	1.54477	Methy	1.24498	Methy	1.21196	Margin	0.608872	Margin	0.847338	Margin	0.817968	Methy	1.74857	Methy	1.57385	Methy	1.5375	Methy	1.74701
cg26320830	4	165523844	MARCH1;MARCH1	NM_001166373;NM_001166373	1stExon;5'UTR	Island	T2D	Unmethy	-3.42297	Unmethy	-3.12018	Unmethy	-2.86021	Margin	-2.01128	Unmethy	-2.26253	Unmethy	-1.96672	Unmethy	-4.03025	Unmethy	-3.95711	Unmethy	-4.06551	Unmethy	-4.07752
cg21169914	4	165523938	2001-03-01	NM_001166373	TSS200	Island	T2D	Unmethy	-2.17109	Unmethy	-1.7879	Unmethy	-2.04089	Margin	-1.75851	Margin	-1.59853	Margin	-1.59919	Unmethy	-2.89241	Unmethy	-2.81661	Unmethy	-2.83273	Unmethy	-2.88481
cg10127275	4	165523946	2001-03-01	NM_001166373	TSS200	Island	T2D	Unmethy	-1.92836	Margin	-1.72187	Unmethy	-1.96148	Margin	-1.47448	Margin	-1.31165	Margin	-1.43144	Unmethy	-2.58032	Unmethy	-2.46167	Unmethy	-2.47341	Unmethy	-2.46328
cg10943359	4	165523981	2001-03-01	NM_001166373	TSS200	Island	T2D	Margin	-1.4584	Margin	-1.10024	Margin	-1.30417	Margin	-0.846791	Margin	-0.771792	Margin	-0.876984	Unmethy	-2.06519	Unmethy	-2.14592	Unmethy	-2.19137	Unmethy	-2.1959
cg21300373	4	165523990	2001-03-01	NM_001166373	TSS200	Island	T2D	Margin	-1.58217	Margin	-1.3599	Margin	-1.53369	Margin	-0.872133	Margin	-0.874457	Margin	-0.887209	Unmethy	-2.48171	Unmethy	-2.54611	Unmethy	-2.75713	Unmethy	-2.88746
cg02990869	4	165524292	2001-03-01	NM_001166373	TSS1500	Island	T2D	Unmethy	-2.211	Unmethy	-1.73171	Unmethy	-1.81144	Margin	-1.43472	Margin	-1.43523	Margin	-1.32005	Unmethy	-2.79631	Unmethy	-2.52513	Unmethy	-2.64906	Unmethy	-3.01907
cg07160277	4	165524305	2001-03-01	NM_001166373	TSS1500	Island	T2D	Unmethy	-2.18111	Unmethy	-2.10554	Unmethy	-1.98149	Margin	-1.53273	Margin	-1.68166	Margin	-1.64907	Unmethy	-3.01389	Unmethy	-2.73865	Unmethy	-2.8621	Unmethy	-2.81633
cg18685561	4	165524472	2001-03-01	NM_001166373	TSS1500	Island	T2D	Margin	-1.85295	Margin	-1.6793	Unmethy	-1.89401	Margin	-1.21601	Margin	-1.3513	Margin	-1.27723	Unmethy	-2.44331	Unmethy	-2.41948	Unmethy	-2.39089	Unmethy	-2.4615
cg10453719	4	165524500	2001-03-01	NM_001166373	TSS1500	Island	T2D	Unmethy	-2.25898	Unmethy	-2.01983	Unmethy	-2.17872	Margin	-1.06193	Margin	-1.20348	Margin	-1.24256	Unmethy	-3.37086	Unmethy	-3.41898	Unmethy	-3.46218	Unmethy	-3.79025
cg25291004	4	165524764	2001-03-01	NM_001166373	TSS1500	S_Shore	T2D	Unmethy	-2.20731	Unmethy	-2.11732	Unmethy	-2.28456	Margin	-1.98592	Unmethy	-2.00411	Unmethy	-1.79283	Unmethy	-2.65869	Unmethy	-2.81231	Unmethy	-2.57426	Unmethy	-2.51461
cg01804183	5	35892181	IL7R	NM_002185	TSS1500	NA	T1D	Methy	2.54767	Methy	1.62723	Margin	-0.106249	Margin	0.314014	Methy	2.52583	Methy	2.99936	Methy	3.39129	Methy	3.06636	Methy	3.28007	Methy	3.55143
cg04312209	5	35892887	IL7R	NM_002185	1stExon	NA	T1D	Margin	0.039756	Margin	-1.19476	Unmethy	-2.59923	Unmethy	-3.8801	Unmethy	-2.54518	Unmethy	-2.53918	Margin	0.209702	Methy	0.698987	Margin	0.741918	Margin	0.506129
cg01027405	5	35896094	IL7R	NM_002185	Body	NA	T1D	Methy	1.23381	Margin	0.376162	Unmethy	-1.78431	Margin	-1.82291	Margin	0.3489	Margin	-0.113421	Methy	2.30821	Methy	1.94555	Methy	1.97871	Methy	2.01807
cg09142144	5	35975604	CAPSL;CAPSL	NM_144647;NM_001042625	TSS1500;TSS1500	NA	T1D	Methy	1.89151	Methy	1.48255	Methy	1.21321	Margin	0.66884	Margin	0.0159381	Methy	1.94977	Methy	1.94169	Methy	2.10565	Methy	2.24979	Methy	2.18398
cg14868574	5	42459475	GHR	NM_000163	TSS1500	Island	SLE	Unmethy	-2.65731	Unmethy	-2.69775	Unmethy	-2.80506	Margin	-2.05607	Unmethy	-2.54402	Unmethy	-1.88613	Unmethy	-3.49856	Unmethy	-3.47531	Unmethy	-3.57383	Unmethy	-3.71795
cg18160072	5	42460182	GHR	NM_000163	5'UTR	Island	SLE	Unmethy	-2.08658	Unmethy	-1.84023	Unmethy	-1.68642	Margin	-1.43777	Margin	-1.63905	Margin	-1.35925	Unmethy	-2.72422	Unmethy	-2.60663	Unmethy	-2.56966	Unmethy	-2.76008
cg00394261	5	42519489	GHR	NM_000163	5'UTR	NA	SLE	Methy	2.12924	Methy	1.21138	Methy	1.25584	Margin	0.765381	Margin	0.470935	Margin	0.629355	Methy	0.87476	Methy	2.41993	Methy	2.48307	Methy	2.14175
cg12887711	5	42619449	GHR	NM_000163	Body	NA	SLE	Margin	-1.52867	Margin	-1.55069	Unmethy	-1.7978	Unmethy	-2.17047	Unmethy	-2.18638	Unmethy	-1.86342	Margin	-1.36579	Margin	-1.37613	Margin	-1.28575	Margin	-1.2473
cg18304305	5	42756278	GHR	NM_000163	3'UTR	NA	SLE	Margin	-1.79335	Margin	-1.57643	Margin	-1.62011	Margin	-1.70481	Unmethy	-2.08989	Margin	0.0701081	Unmethy	-2.32645	Unmethy	-2.44272	Unmethy	-2.49469	Unmethy	-2.4427
cg14967393	5	55301753	IL6ST;IL6ST	NM_175767;NM_002184	Body;Body	NA	RA	Methy	1.71255	Methy	1.39634	Margin	0.477848	Methy	1.45744	Methy	1.99611	Methy	2.32444	Methy	1.31164	Methy	1.90473	Methy	1.97089	Methy	1.80986
cg18700420	5	55322109	IL6ST;IL6ST	NM_002184;NM_175767	5'UTR;5'UTR	N_Shelf	RA	Methy	2.11698	Methy	1.21373	Margin	-1.0238	Margin	0.337859	Methy	1.83148	Methy	2.47058	Methy	2.98469	Methy	2.53905	Methy	2.63216	Methy	3.02362
cg24729879	5	55324649	IL6ST;IL6ST	NM_002184;NM_175767	5'UTR;5'UTR	N_Shore	RA	Methy	1.48494	Methy	1.01441	Margin	-0.961165	Methy	0.977531	Methy	2.9582	Methy	2.54615	Methy	1.00774	Methy	2.02387	Methy	2.01234	Methy	1.73876
cg16375820	5	55324758	IL6ST;IL6ST	NM_002184;NM_175767	5'UTR;5'UTR	N_Shore	RA	Methy	2.34539	Methy	2.01312	Margin	0.198745	Methy	2.02904	Methy	3.61287	Methy	3.20737	Methy	2.85452	Methy	3.02174	Methy	3.03786	Methy	3.22475
cg19744051	5	55330041	NA	NA	NA	S_Shelf	RA	Margin	0.77547	Margin	0.999875	Margin	0.94348	Margin	0.775668	Margin	0.882015	Margin	0.853116	Margin	0.662291	Margin	0.623198	Methy	1.18754	Margin	0.779293
cg06061692	5	55335887	NA	NA	NA	NA	RA	Methy	1.13455	Methy	1.33467	Methy	1.45588	Methy	1.00825	Methy	1.10235	Methy	1.20749	Margin	0.651959	Methy	0.848208	Margin	0.853815	Methy	0.899036
cg21620078	5	55343574	NA	NA	NA	NA	RA	Methy	1.6914	Methy	1.22842	Margin	0.372373	Methy	1.21864	Methy	1.73002	Methy	1.8174	Margin	0.4765	Methy	1.98676	Methy	1.94926	Methy	2.08631
cg19941708	5	55367852	NA	NA	NA	NA	RA	Methy	1.06817	Methy	1.14621	Methy	1.13378	Methy	0.988239	Margin	0.972242	Methy	1.49987	Methy	1.21059	Methy	1.14755	Methy	1.17055	Methy	1.11922
cg14553705	5	55382813	NA	NA	NA	NA	RA	Margin	-1.19376	Margin	-1.02309	Margin	-1.55736	Margin	-1.33942	Margin	-1.29068	Margin	-1.1804	Margin	-1.6125	Margin	-1.40558	Margin	-1.1793	Unmethy	-1.81755
cg05511755	5	55402286	NA	NA	NA	NA	RA	Methy	0.971618	Methy	1.43182	Methy	1.81314	Methy	2.68718	Methy	1.80813	Margin	1.07174	Margin	0.277276	Margin	0.331552	Margin	0.349581	Margin	0.305806
cg07145038	5	55410271	NA	NA	NA	NA	RA	Methy	2.77923	Methy	2.29522	Methy	3.37146	Methy	2.94672	Methy	2.80597	Unmethy	-1.80331	Methy	3.08004	Methy	2.92085	Methy	2.92738	Methy	2.87426
cg16462648	5	55421007	NA	NA	NA	NA	RA	Methy	2.22264	Methy	1.6366	Methy	1.26411	Margin	0.442968	Margin	0.40506	Methy	1.45071	Methy	3.32546	Methy	3.04302	Methy	3.0829	Methy	3.11424
cg15667493	5	55439936	ANKRD55;ANKRD55	NM_001039935;NM_024669	Body;Body	NA	RA	Methy	2.60765	Methy	1.93592	Margin	0.734187	Methy	2.45398	Methy	2.67888	Methy	3.03019	Methy	2.86299	Methy	2.79576	Methy	2.71144	Methy	2.65355
cg06750410	5	55448682	ANKRD55;ANKRD55	NM_001039935;NM_024669	TSS200;Body	NA	RA	Margin	0.355092	Methy	1.39992	Methy	1.31273	Methy	2.31271	Methy	2.24987	Methy	3.23524	Margin	-1.16657	Margin	-0.269801	Margin	-0.0789554	Margin	0.543037
cg16578883	5	58457316	PDE4D;PDE4D;PDE4D	NM_001165899;NM_001104631;NM_006203	Body;Body;Body	NA	Asthma	Methy	1.63479	Margin	0.987772	Margin	-0.3449	Margin	-0.341643	Methy	0.988206	Methy	3.32983	Methy	3.02491	Methy	2.76963	Methy	3.10193	Methy	2.90983
cg00335124	5	58688565	PDE4D;PDE4D;PDE4D	NM_001165899;NM_001104631;NM_006203	Body;Body;Body	NA	Asthma	Margin	-0.517806	Methy	1.19829	Methy	1.25776	Methy	1.14939	Margin	0.51336	Methy	3.58045	Methy	1.71055	Unmethy	-2.94029	Unmethy	-3.86018	Unmethy	-3.80909
cg23987137	5	58689381	PDE4D;PDE4D;PDE4D	NM_001165899;NM_001104631;NM_006203	Body;Body;Body	NA	Asthma	Methy	2.23516	Methy	3.09175	Methy	3.41827	Methy	3.63153	Methy	2.89472	Methy	3.67681	Methy	3.17391	Methy	1.53979	Methy	0.970838	Unmethy	-1.60897
cg15834202	5	58901675	PDE4D;PDE4D;PDE4D	NM_001165899;NM_001104631;NM_006203	Body;Body;Body	NA	Asthma	Margin	0.450174	Margin	0.152409	Margin	-0.3909	Margin	-1.37405	Margin	-1.29952	Margin	0.86987	Methy	1.58796	Methy	1.14359	Methy	1.01532	Margin	-0.267444
cg05593411	5	58919187	PDE4D;PDE4D;PDE4D	NM_001165899;NM_006203;NM_001104631	Body;TSS1500;Body	NA	Asthma	Margin	-1.62748	Margin	-1.56548	Margin	-1.53543	Margin	-1.84931	Margin	-1.45471	Margin	-1.37929	Margin	-1.76528	Margin	-1.74201	Unmethy	-1.87	Unmethy	-1.77346
cg06895913	5	58993667	PDE4D;PDE4D	NM_001165899;NM_001104631	Body;Body	NA	Asthma	Margin	-0.0842269	Margin	0.872081	Margin	0.804518	Methy	1.29924	Margin	0.884038	Methy	1.49964	Methy	0.891164	Margin	-1.25359	Margin	-0.727739	Methy	1.13948
cg08500112	5	59122189	PDE4D;PDE4D	NM_001165899;NM_001104631	Body;Body	NA	Asthma	Unmethy	-2.21805	Unmethy	-1.80845	Margin	-1.44232	Margin	-1.14672	Margin	-1.402	Unmethy	-3.00022	Unmethy	-3.05373	Unmethy	-2.9142	Unmethy	-2.95141	Unmethy	-2.91617
cg27583655	5	59162275	PDE4D;PDE4D	NM_001165899;NM_001104631	Body;Body	NA	Asthma	Methy	2.17336	Methy	1.73428	Methy	1.2735	Margin	0.798969	Margin	0.908232	Methy	1.55948	Methy	2.90303	Methy	2.84389	Methy	2.73506	Methy	2.63719
cg06469229	5	59223970	PDE4D;PDE4D	NM_001165899;NM_001104631	Body;Body	N_Shore	Asthma	Margin	-1.18988	Margin	-1.35451	Unmethy	-1.71756	Margin	-1.48531	Margin	-1.66839	Margin	-1.39074	Margin	-1.627	Margin	-1.13917	Margin	-1.22682	Unmethy	-1.86267
cg03154690	5	59224677	PDE4D;PDE4D	NM_001165899;NM_001104631	Body;Body	N_Shore	Asthma	Margin	-1.87346	Unmethy	-1.85059	Unmethy	-2.05647	Margin	-1.84958	Unmethy	-1.98163	Margin	-1.70335	Unmethy	-2.5058	Unmethy	-2.04399	Unmethy	-2.06704	Unmethy	-2.32436
cg03323696	5	59224877	PDE4D;PDE4D	NM_001165899;NM_001104631	Body;1stExon	Island	Asthma	Unmethy	-2.21483	Unmethy	-2.11373	Unmethy	-2.14341	Margin	-0.610375	Margin	-1.18846	Margin	-1.10617	Unmethy	-4.00542	Unmethy	-3.16116	Unmethy	-3.07752	Unmethy	-3.91828
cg26078977	5	59225224	PDE4D;PDE4D;PDE4D	NM_001165899;NM_001104631;NM_001104631	Body;1stExon;5'UTR	Island	Asthma	Unmethy	-2.02127	Margin	-1.671	Unmethy	-1.96636	Margin	-0.720732	Margin	-1.21259	Margin	-0.956161	Unmethy	-2.98941	Unmethy	-2.88434	Unmethy	-2.83701	Unmethy	-3.02904
cg22706610	5	59225481	PDE4D;PDE4D	NM_001165899;NM_001104631	Body;TSS200	Island	Asthma	Unmethy	-2.16984	Unmethy	-2.29128	Unmethy	-2.4224	Margin	-1.40722	Margin	-1.86777	Margin	-1.76048	Unmethy	-2.89217	Unmethy	-2.7223	Unmethy	-2.77135	Unmethy	-3.01318
cg11258089	5	59225548	PDE4D;PDE4D	NM_001165899;NM_001104631	Body;TSS200	Island	Asthma	Unmethy	-2.76089	Unmethy	-2.73028	Unmethy	-2.65675	Margin	-1.85846	Unmethy	-2.28466	Unmethy	-1.83737	Unmethy	-3.53446	Unmethy	-3.06019	Unmethy	-3.10442	Unmethy	-3.63427
cg07190535	5	59225600	PDE4D;PDE4D	NM_001165899;NM_001104631	Body;TSS1500	Island	Asthma	Unmethy	-2.835	Unmethy	-2.61194	Unmethy	-2.73279	Margin	-1.70857	Unmethy	-2.12748	Unmethy	-2.01047	Unmethy	-3.44228	Unmethy	-3.28937	Unmethy	-3.52601	Unmethy	-3.71884
cg24628676	5	59225603	PDE4D;PDE4D	NM_001165899;NM_001104631	Body;TSS1500	Island	Asthma	Margin	-1.64336	Margin	-1.53732	Margin	-1.61912	Margin	-1.2456	Margin	-1.36212	Margin	-1.168	Unmethy	-2.12689	Unmethy	-2.01589	Unmethy	-1.86698	Unmethy	-2.01783
cg15410418	5	59594937	PDE4D	NM_001165899	5'UTR	NA	Asthma	Margin	0.108614	Methy	2.015	Methy	2.20044	Methy	1.65427	Methy	1.76896	Methy	2.44256	Methy	2.17252	Margin	-1.71147	Margin	-1.23337	Margin	-0.322688
cg10487428	5	59594975	PDE4D	NM_001165899	5'UTR	NA	Asthma	Margin	0.0585606	Methy	2.13843	Methy	3.01124	Methy	3.08628	Methy	2.9691	Methy	3.39696	Methy	1.71757	Unmethy	-2.06335	Unmethy	-1.8339	Margin	-0.901026
cg17287998	5	59747107	PDE4D	NM_001165899	5'UTR	NA	Asthma	Methy	6.63684	Unmethy	6.24052	Unmethy	6.26129	Unmethy	6.12593	Unmethy	6.43936	Methy	5.96836	Methy	6.1589	Methy	6.4359	Margin	6.29322	Methy	5.97586
cg21023952	5	59818792	PDE4D;PART1;PART1;PART1	NM_001165899;NR_028509;NR_024617;NR_028508	5'UTR;TSS1500;TSS1500;TSS1500	NA	Asthma	Methy	2.64164	Methy	2.08521	Methy	1.58728	Margin	0.886718	Methy	1.07954	Methy	2.77302	Methy	3.01475	Methy	2.87759	Methy	3.24636	Methy	3.04993
cg18704047	5	59819425	PART1;PART1;PDE4D;PART1	NR_028508;NR_024617;NM_001165899;NR_028509	TSS200;Body;5'UTR;TSS200	NA	Asthma	Methy	2.06848	Methy	1.59516	Margin	0.928208	Margin	0.623641	Margin	0.599073	Methy	2.30791	Methy	2.59203	Methy	2.51323	Methy	2.6766	Methy	2.85238
cg05141014	5	59819960	PART1;PART1;PDE4D;PART1	NR_028508;NR_024617;NM_001165899;NR_028509	Body;Body;TSS1500;Body	NA	Asthma	Methy	6.37196	Methy	5.76467	Margin	6.00721	Unmethy	5.89124	Methy	5.63058	Methy	5.86653	Methy	5.82006	Methy	6.63215	Methy	5.82309	Methy	5.66875
cg08410996	5	76408778	ZBED3	NM_032367	Body	Island	T2D	Unmethy	-2.69291	Unmethy	-1.85108	Margin	-1.48244	Margin	-1.60085	Unmethy	-2.35559	Unmethy	-2.33664	Unmethy	-3.03605	Unmethy	-3.24949	Unmethy	-3.09822	Unmethy	-3.27579
cg05454501	5	76409147	ZBED3	NM_032367	Body	Island	T2D	Unmethy	-3.50769	Unmethy	-2.52109	Margin	-1.59261	Margin	-1.84043	Unmethy	-3.98711	Unmethy	-3.86344	Unmethy	-4.57257	Unmethy	-4.74237	Unmethy	-4.91794	Unmethy	-4.93714
cg03163459	5	76409475	ZBED3	NM_032367	5'UTR	Island	T2D	Margin	-0.865394	Margin	-0.074022	Margin	0.617059	Methy	1.03754	Margin	-0.18972	Margin	-0.668205	Unmethy	-2.45839	Unmethy	-2.00034	Unmethy	-2.2941	Unmethy	-2.5979
cg22051204	5	76409559	ZBED3	NM_032367	5'UTR	S_Shore	T2D	Margin	0.561371	Methy	1.10266	Methy	1.54266	Methy	1.76625	Methy	1.14031	Margin	1.13309	Margin	0.300318	Margin	0.308024	Margin	0.391313	Margin	0.224172
cg05278955	5	76417294	ZBED3;LOC728723	NM_032367;NR_024398	5'UTR;TSS1500	N_Shore	T2D	Methy	1.70206	Methy	2.76089	Methy	3.48072	Methy	3.54279	Methy	3.27695	Methy	3.67198	Methy	1.23117	Methy	1.09368	Margin	0.728193	Margin	-0.845979
cg19657875	5	76418137	ZBED3;LOC728723	NM_032367;NR_024398	5'UTR;TSS1500	N_Shore	T2D	Unmethy	-2.51267	Unmethy	-2.26069	Unmethy	-1.86246	Margin	-1.96988	Unmethy	-2.0964	Unmethy	-2.81105	Unmethy	-3.00752	Unmethy	-2.88068	Unmethy	-2.75819	Unmethy	-2.84523
cg22202786	5	76419250	LOC728723;ZBED3	NR_024398;NM_032367	Body;TSS1500	S_Shore	T2D	Margin	-1.14733	Margin	-0.834573	Margin	-0.453495	Margin	-0.56922	Margin	-0.657566	Margin	-0.880236	Margin	-1.59931	Margin	-1.69354	Unmethy	-1.67197	Margin	-1.49583
cg06889971	5	76419813	LOC728723;ZBED3	NR_024398;NM_032367	Body;TSS1500	S_Shore	T2D	Margin	0.896233	Methy	1.10454	Methy	1.33531	Methy	1.60112	Methy	1.39989	Margin	1.13506	Margin	0.662749	Margin	0.548519	Margin	0.686058	Methy	0.867879
cg05684528	5	76509673	NA	NA	NA	N_Shelf	T2D	Margin	-0.0445524	Methy	1.26393	Methy	1.87554	Methy	1.23578	Methy	1.01978	Methy	2.21515	Methy	0.901673	Margin	-1.57914	Unmethy	-1.94178	Unmethy	-2.64616
cg16418800	5	76512211	NA	NA	NA	Island	T2D	Unmethy	-2.35624	Unmethy	-2.08569	Unmethy	-2.14777	Margin	-1.85324	Unmethy	-2.06834	Unmethy	-1.98988	Unmethy	-2.8929	Unmethy	-2.9225	Unmethy	-2.81776	Unmethy	-2.81141
cg16461538	5	76543240	PDE8B;PDE8B;PDE8B;PDE8B;PDE8B	NM_001029853;NM_001029854;NM_003719;NM_001029851;NM_001029852	Body;Body;Body;Body;Body	S_Shore	T2D	Unmethy	-2.5394	Unmethy	-2.38169	Unmethy	-1.94794	Margin	-2.03592	Unmethy	-2.53981	Unmethy	-2.34101	Unmethy	-3.12216	Unmethy	-3.02765	Unmethy	-3.15093	Unmethy	-2.90386
cg12559197	5	76690539	PDE8B;PDE8B;PDE8B;PDE8B;PDE8B	NM_001029853;NM_001029854;NM_003719;NM_001029851;NM_001029852	Body;Body;Body;Body;Body	NA	T2D	Margin	-0.474862	Margin	0.666873	Methy	1.93191	Methy	2.02058	Margin	0.704541	Margin	0.507772	Unmethy	-3.28265	Unmethy	-2.28274	Unmethy	-2.21482	Unmethy	-1.73253
cg05225461	5	102624654	C5orf30	NM_033211	5'UTR	S_Shore	RA	Methy	1.99604	Methy	1.60533	Methy	1.63704	Methy	1.2288	Methy	1.32305	Margin	0.856853	Methy	2.2704	Methy	2.50248	Methy	2.2517	Methy	1.32281
cg21184216	5	102625933	C5orf30	NM_033211	5'UTR	S_Shelf	RA	Methy	1.59436	Methy	2.17511	Methy	2.93183	Methy	2.88782	Methy	2.76295	Margin	1.13148	Methy	0.695008	Methy	1.20036	Methy	1.14828	Methy	0.985987
cg17605604	5	102640798	C5orf30	NM_033211	3'UTR	NA	RA	Margin	0.433613	Margin	0.613588	Margin	0.652168	Margin	0.509867	Methy	1.06817	Margin	0.80591	Methy	0.873068	Methy	0.836259	Margin	0.87628	Methy	1.0135
cg02061660	5	110116029	SLC25A46	NM_138773	Body	NA	Asthma	Methy	1.6741	Margin	0.396626	Margin	-0.653094	Unmethy	-2.2446	Margin	-0.657377	Margin	0.356317	Methy	2.55348	Methy	2.44198	Methy	2.56295	Methy	2.59468
cg21070081	5	110133061	NA	NA	NA	NA	Asthma	Unmethy	-3.24249	Unmethy	-2.64991	Unmethy	-2.78133	Unmethy	-3.20642	Unmethy	-2.96135	Unmethy	-3.20583	Unmethy	-3.0021	Unmethy	-3.54599	Margin	-1.10293	Unmethy	-3.33704
cg11324660	5	110217132	NA	NA	NA	NA	Asthma	Methy	1.70369	Methy	1.41473	Methy	1.16491	Methy	1.01303	Margin	0.767234	Methy	1.43858	Methy	2.10058	Methy	1.95015	Methy	2.06431	Methy	2.0791
cg13983495	5	110349478	NA	NA	NA	NA	Asthma	Margin	0.747274	Margin	0.934685	Margin	0.875821	Margin	0.779553	Margin	0.965706	Margin	0.955728	Methy	0.728983	Margin	0.668471	Margin	0.835012	Margin	0.836539
cg15557878	5	110433948	TSLP	NM_033035	TSS1500	N_Shelf	Asthma	Margin	-1.50966	Margin	-1.31134	Margin	-1.47141	Margin	-1.24324	Margin	-1.16702	Margin	-1.04351	Unmethy	-2.03163	Unmethy	-1.97226	Unmethy	-1.98795	Unmethy	-1.96056
cg21145140	5	110437366	TSLP;TSLP	NM_138551;NM_033035	Body;Body	S_Shore	Asthma	Margin	-1.21399	Margin	-1.10883	Margin	-1.04417	Margin	-1.25271	Margin	-1.29466	Margin	-1.05004	Margin	-1.10991	Margin	-1.25091	Margin	-1.1614	Unmethy	-1.53922
cg20710777	5	110439639	TSLP;TSLP	NM_138551;NM_033035	Body;Body	S_Shelf	Asthma	Methy	1.86021	Methy	3.19312	Methy	3.52175	Methy	3.49115	Methy	3.40711	Methy	3.72653	Methy	2.8291	Methy	1.11418	Methy	1.04826	Margin	-0.875323
cg18897025	5	110441570	TSLP;TSLP	NM_033035;NM_138551	3'UTR;3'UTR	NA	Asthma	Margin	0.25296	Methy	1.4078	Methy	3.0372	Methy	3.10687	Methy	3.14589	Methy	3.32718	Margin	-1.4694	Margin	-1.50804	Margin	-0.935638	Margin	0.790268
cg14196790	5	131732934	SLC22A5	NM_003060	TSS1500	N_Shore	Asthma	Unmethy	-2.22354	Unmethy	-1.74154	Margin	-1.28113	Margin	-1.20001	Margin	-1.26841	Unmethy	-2.64639	Unmethy	-3.09277	Unmethy	-2.76936	Unmethy	-2.97485	Unmethy	-3.01629
cg17951613	5	131733344	SLC22A5;SLC22A5	NM_003060;NM_003060	5'UTR;1stExon	Island	Asthma	Margin	-1.46742	Margin	-1.57774	Margin	-1.54405	Margin	-1.56342	Margin	-1.66409	Margin	-1.64986	Margin	-1.50154	Margin	-1.43504	Unmethy	-1.61294	Unmethy	-1.56469
cg23475112	5	131753224	SLC22A5	NM_003060	Body	NA	Asthma	Methy	5.57223	Margin	5.88045	Methy	5.48493	Unmethy	5.88792	Methy	5.3971	Methy	5.51671	Methy	5.62696	Methy	5.60058	Methy	5.62795	Methy	5.50416
cg21935083	5	131920213	RAD50;RAD50	NM_133482;NM_005732	TSS1500;TSS1500	N_Shore	Asthma	Unmethy	-2.1733	Margin	-1.50847	Margin	-1.44278	Unmethy	-2.11064	Margin	-1.76801	Margin	-1.24512	Margin	-1.52808	Unmethy	-2.8979	Unmethy	-2.72543	Unmethy	-2.5432
cg05198819	5	131920338	RAD50;RAD50	NM_133482;NM_005732	TSS200;TSS200	N_Shore	Asthma	Margin	0.632418	Margin	0.635084	Margin	0.629796	Margin	0.224226	Margin	0.329268	Margin	0.164724	Methy	0.696643	Methy	0.696497	Margin	0.817869	Methy	0.932274
cg14597804	5	131993225	RAD50;RAD50	NM_133482;NM_005732	Body;Body	NA	Asthma	Methy	2.72619	Methy	2.16724	Methy	1.61744	Methy	1.23977	Margin	0.619171	Methy	1.50164	Methy	3.72573	Methy	3.12414	Methy	3.60613	Methy	3.31075
cg16097655	5	132019664	NA	NA	NA	Island	Asthma	Margin	-1.34831	Margin	-0.957658	Margin	-0.942118	Margin	-0.724493	Margin	-0.668759	Unmethy	-2.19528	Unmethy	-1.91053	Margin	-1.88933	Unmethy	-1.81508	Unmethy	-1.78924
cg17084289	5	132020124	NA	NA	NA	Island	Asthma	Margin	-1.54971	Margin	-1.59904	Margin	-1.59704	Margin	-1.70403	Margin	-1.69465	Margin	-1.49928	Margin	-1.65169	Margin	-1.59923	Margin	-1.41465	Unmethy	-1.56112
cg04303330	5	132020329	IL13	NM_002188	TSS1500	S_Shore	Asthma	Margin	-0.898393	Margin	-0.276666	Margin	0.189807	Margin	0.0595808	Margin	-0.230657	Margin	-0.523852	Margin	-1.51724	Margin	-1.6691	Unmethy	-1.93121	Unmethy	-2.8595
cg13566430	5	132020354	IL13	NM_002188	TSS1500	S_Shore	Asthma	Margin	-1.61401	Margin	-1.65292	Margin	-1.26231	Margin	-1.04944	Margin	-1.46367	Margin	-1.50929	Unmethy	-2.00462	Unmethy	-2.22867	Unmethy	-2.09287	Unmethy	-2.51013
cg06584121	5	132021717	IL13	NM_002188	TSS200	S_Shore	Asthma	Methy	2.64072	Methy	2.20294	Methy	1.8616	Methy	1.95519	Margin	0.932621	Methy	3.28617	Methy	2.931	Methy	2.76221	Methy	2.22216	Margin	0.463961
cg06967316	5	132021752	IL13	NM_002188	TSS200	S_Shore	Asthma	Methy	1.87637	Methy	1.76182	Methy	1.3875	Methy	1.51971	Margin	0.709375	Methy	2.78448	Methy	2.5622	Methy	2.16326	Methy	1.69664	Margin	0.522156
cg11798521	5	132024042	IL13	NM_002188	3'UTR	S_Shelf	Asthma	Methy	2.20615	Methy	1.79883	Methy	1.65489	Methy	1.10844	Margin	0.768298	Methy	2.36987	Methy	2.93034	Methy	2.71828	Methy	2.85172	Methy	2.80653
cg09813400	5	150411829	TNIP1	NM_006058	Body	NA	SLE	Margin	0.300314	Methy	1.15595	Methy	2.00084	Methy	2.20551	Methy	1.79888	Methy	1.59405	Margin	0.299567	Margin	-0.313636	Margin	-0.303464	Margin	-0.382805
cg10967114	5	150422861	TNIP1	NM_006058	Body	NA	SLE	Methy	3.35044	Methy	2.8034	Methy	3.74011	Methy	4.31197	Methy	3.76652	Methy	4.00924	Margin	0.0182871	Methy	3.40539	Methy	3.12985	Methy	2.06975
cg14135060	5	150436478	TNIP1	NM_006058	5'UTR	N_Shelf	SLE	Methy	1.87964	Methy	1.7937	Methy	1.54974	Margin	0.908932	Methy	1.09307	Methy	1.39844	Methy	2.30671	Methy	2.10395	Methy	2.14991	Methy	2.18836
cg22178392	5	150439883	TNIP1	NM_006058	5'UTR	N_Shore	SLE	Margin	-1.39917	Margin	-1.28868	Margin	-1.36914	Margin	-1.52165	Margin	-1.68127	Margin	-1.4708	Margin	-1.50708	Margin	-1.44028	Margin	-1.3823	Unmethy	-1.57452
cg12642815	5	150441388	TNIP1	NM_006058	TSS200	S_Shore	SLE	Unmethy	-2.86817	Unmethy	-2.04589	Unmethy	-1.649	Margin	-1.83214	Unmethy	-2.19832	Unmethy	-2.95631	Unmethy	-3.58027	Unmethy	-3.56782	Unmethy	-3.71337	Unmethy	-3.88409
cg22480558	5	150441404	TNIP1	NM_006058	TSS1500	S_Shore	SLE	Unmethy	-2.03286	Margin	-1.50978	Margin	-0.839231	Margin	-1.03652	Margin	-1.46774	Unmethy	-2.14205	Unmethy	-2.815	Unmethy	-2.6231	Unmethy	-2.68243	Unmethy	-2.92882
cg26775866	5	159781771	PTTG1	NM_004219	5'UTR	S_Shore	SLE	Margin	-0.703902	Margin	-0.103648	Margin	0.566634	Methy	1.02772	Margin	-0.412707	Margin	-1.03263	Margin	-1.38855	Margin	-1.50808	Margin	-1.40543	Unmethy	-1.87678
cg08688907	5	159823503	NA	NA	NA	NA	SLE	Margin	0.920725	Methy	1.73735	Methy	2.78762	Methy	3.33575	Methy	2.92127	Methy	3.52672	Margin	-0.599378	Margin	0.0361916	Margin	0.308756	Methy	0.887764
cg26189303	5	159830488	NA	NA	NA	NA	SLE	Unmethy	-2.19383	Margin	-1.06055	Margin	-0.267579	Margin	-0.397511	Margin	-1.76908	Margin	-1.39453	Unmethy	-3.38488	Unmethy	-3.40759	Unmethy	-3.40056	Unmethy	-3.79942
cg16989132	5	159845265	NA	NA	NA	NA	SLE	Methy	2.54516	Methy	2.10641	Methy	1.38795	Methy	0.973202	Margin	0.712223	Methy	2.57708	Methy	3.02473	Methy	2.73776	Methy	2.83725	Methy	2.72065
cg02400308	5	159980717	ATP10B	NM_025153	Body	NA	SLE	Methy	1.44332	Methy	1.49299	Methy	1.35452	Methy	1.16055	Methy	1.29064	Methy	1.49672	Methy	1.54494	Methy	1.34759	Methy	1.25259	Margin	0.451666
cg09705798	5	159980972	ATP10B	NM_025153	Body	NA	SLE	Methy	1.57515	Methy	1.47985	Methy	1.34275	Margin	0.745119	Margin	0.547449	Margin	1.12115	Methy	1.90325	Methy	1.71807	Methy	1.85942	Methy	1.92775
cg12477050	5	160025211	ATP10B	NM_025153	Body	NA	SLE	Methy	1.61575	Methy	1.31087	Methy	1.48133	Methy	1.05624	Methy	1.05006	Margin	-1.69928	Methy	1.72343	Methy	1.53113	Methy	1.5283	Methy	1.7515
cg24639117	5	160119565	ATP10B	NM_025153	5'UTR	NA	SLE	Methy	1.88985	Methy	1.74415	Methy	1.60194	Margin	0.863092	Methy	1.10334	Methy	1.48604	Methy	2.66067	Methy	2.10271	Methy	2.33055	Methy	2.43162
cg09152866	6	11822548	C6orf105;C6orf105	NM_032744;NM_001143948	3'UTR;3'UTR	NA	Asthma	Margin	0.710607	Margin	0.176445	Margin	-1.61579	Margin	-0.0875474	Margin	0.753504	Margin	-0.730437	Methy	0.990291	Methy	0.930359	Methy	1.00799	Methy	1.08085
cg26130669	6	11879459	C6orf105;C6orf105	NM_032744;NM_001143948	Body;Body	NA	Asthma	Margin	0.919944	Methy	1.41929	Methy	2.22982	Methy	1.60358	Methy	1.40291	Methy	2.55015	Margin	0.5667	Methy	0.792342	Methy	1.0035	Methy	1.15222
cg15601361	6	11879479	C6orf105;C6orf105	NM_032744;NM_001143948	Body;Body	NA	Asthma	Margin	0.742833	Methy	1.20994	Methy	2.10336	Methy	2.06195	Methy	1.78054	Methy	2.45165	Margin	-0.321621	Margin	0.482368	Margin	0.509159	Margin	0.66573
cg08421910	6	11879826	C6orf105;C6orf105	NM_032744;NM_001143948	Body;Body	NA	Asthma	Methy	1.45666	Methy	2.19826	Methy	3.25937	Methy	3.56884	Methy	3.24116	Methy	3.77923	Margin	0.173323	Margin	0.553	Margin	0.883326	Methy	1.34233
cg14178895	6	11886888	C6orf105;C6orf105	NM_032744;NM_001143948	1stExon;1stExon	NA	Asthma	Margin	-0.657645	Margin	0.806973	Methy	2.00275	Methy	1.01412	Margin	0.296924	Methy	1.88967	Margin	-0.782232	Unmethy	-2.39863	Unmethy	-2.81139	Unmethy	-3.09867
cg26761744	6	11887025	C6orf105;C6orf105;C6orf105;C6orf105	NM_032744;NM_032744;NM_001143948;NM_001143948	1stExon;5'UTR;1stExon;5'UTR	NA	Asthma	Methy	2.473	Methy	2.72981	Methy	3.63334	Methy	3.4925	Methy	3.31012	Methy	3.59385	Methy	1.51588	Methy	2.0355	Methy	1.40299	Margin	-0.447442
cg10787197	6	11887927	C6orf105;C6orf105	NM_032744;NM_001143948	TSS1500;TSS1500	NA	Asthma	Margin	0.0566592	Methy	1.139	Methy	2.79403	Methy	1.99568	Methy	1.58051	Methy	2.35982	Margin	-0.286113	Margin	-1.22022	Margin	-1.35465	Margin	-1.41304
cg17117794	6	20641931	CDKAL1	NM_017774	TSS1500	NA	T2D	Methy	2.98875	Methy	2.9473	Methy	2.99881	Methy	3.10993	Methy	3.47951	Margin	0.125901	Methy	3.22667	Methy	3.44498	Methy	3.5651	Methy	3.29807
cg14729847	6	20642352	CDKAL1	NM_017774	TSS1500	NA	T2D	Unmethy	-1.99405	Margin	-1.63517	Unmethy	-1.83126	Margin	-1.88352	Unmethy	-1.99309	Unmethy	-1.83555	Unmethy	-2.16519	Unmethy	-2.27218	Unmethy	-2.27405	Unmethy	-2.07076
cg20488123	6	20797040	CDKAL1	NM_017774	Body	NA	T2D	Margin	0.759706	Margin	-0.323964	Unmethy	-2.36419	Unmethy	-3.40773	Unmethy	-2.42606	Margin	-0.34161	Methy	1.91393	Methy	1.71772	Methy	1.35351	Margin	0.0198974
cg06512263	6	20817846	CDKAL1	NM_017774	Body	NA	T2D	Margin	-1.22505	Margin	-0.295475	Margin	0.408111	Margin	0.283349	Margin	-0.153004	Methy	1.3398	Unmethy	-3.21121	Unmethy	-2.93018	Unmethy	-3.02313	Unmethy	-3.17725
cg18954479	6	20942203	CDKAL1	NM_017774	Body	NA	T2D	Margin	0.490491	Margin	0.382855	Margin	-0.824851	Margin	0.154795	Margin	0.885384	Methy	1.5501	Methy	0.778637	Margin	0.508435	Margin	0.363091	Margin	-0.430015
cg00682125	6	21107077	CDKAL1	NM_017774	Body	NA	T2D	Methy	3.03612	Methy	2.56745	Methy	3.1346	Methy	3.06542	Methy	3.45183	Margin	-0.700323	Methy	3.05353	Methy	3.12162	Methy	3.40095	Methy	2.99101
cg02642117	6	21141815	CDKAL1	NM_017774	Body	NA	T2D	Methy	1.12135	Methy	2.50834	Methy	3.1704	Methy	3.34683	Methy	3.36278	Methy	3.43237	Methy	1.88515	Margin	0.5181	Margin	0.62965	Methy	1.99411
cg21498062	6	21265844	CDKAL1	NM_017774	Body	NA	T2D	Methy	2.51345	Methy	1.80904	Methy	1.09449	Methy	0.974548	Margin	0.778071	Methy	1.52904	Methy	3.25554	Methy	2.8733	Methy	3.07661	Methy	3.26815
cg21727129	6	29901688	HLA-G	NM_002127	TSS1500	N_Shore	RA	Methy	2.15973	Methy	1.97633	Methy	2.15006	Methy	0.972345	Margin	0.905242	Methy	2.33925	Methy	2.25517	Methy	2.52247	Methy	2.71874	Methy	2.62656
cg09430946	6	29903340	HLA-G	NM_002127	5'UTR	N_Shore	RA	Methy	1.06218	Methy	1.19845	Methy	1.2126	Methy	1.1186	Methy	1.16563	Margin	1.08429	Methy	1.00191	Methy	0.988681	Methy	1.21573	Methy	1.14119
cg17213462	6	29903390	HLA-G	NM_002127	5'UTR	N_Shore	RA	Margin	0.605747	Margin	0.87623	Methy	1.13775	Methy	0.956417	Margin	0.785291	Margin	0.690891	Margin	0.534536	Margin	0.60012	Margin	0.646493	Margin	0.595209
cg03521696	6	29903574	HLA-G	NM_002127	5'UTR	Island	RA	Unmethy	-2.07757	Unmethy	-1.90136	Margin	-1.59805	Margin	-1.32878	Unmethy	-2.1706	Margin	-1.60121	Unmethy	-2.89678	Unmethy	-2.71508	Unmethy	-2.93273	Unmethy	-2.7204
cg26544072	6	29903971	HLA-G	NM_002127	Body	Island	RA	Unmethy	-2.68665	Unmethy	-2.57959	Unmethy	-2.2618	Margin	-2.00764	Unmethy	-2.20095	Unmethy	-2.24747	Unmethy	-2.9296	Unmethy	-3.08319	Unmethy	-2.7996	Unmethy	-2.43827
cg03997176	6	29904045	HLA-G	NM_002127	Body	Island	RA	Unmethy	-2.19778	Unmethy	-2.31389	Unmethy	-2.15836	Margin	-1.48982	Unmethy	-2.01694	Margin	-1.49958	Unmethy	-3.03796	Unmethy	-2.86711	Unmethy	-2.71422	Unmethy	-3.04418
cg19141489	6	29904047	HLA-G	NM_002127	Body	Island	RA	Margin	-1.66577	Margin	-1.56811	Margin	-1.49685	Margin	-1.31907	Margin	-1.48038	Margin	-1.11824	Unmethy	-2.17701	Unmethy	-2.24639	Unmethy	-1.89122	Unmethy	-2.03391
cg22257941	6	29904065	HLA-G	NM_002127	Body	Island	RA	Margin	-1.71246	Margin	-1.65246	Margin	-1.54851	Margin	-1.388	Margin	-1.40134	Margin	-1.38253	Unmethy	-2.1078	Unmethy	-1.98249	Unmethy	-1.91327	Unmethy	-1.95504
cg15174396	6	29904342	HLA-G	NM_002127	Body	Island	RA	Unmethy	-2.19209	Unmethy	-2.09048	Unmethy	-2.1774	Margin	-2.04949	Unmethy	-2.05492	Margin	-1.59477	Unmethy	-2.46846	Unmethy	-2.46908	Unmethy	-2.39782	Unmethy	-2.39849
cg14914254	6	29904349	HLA-G	NM_002127	Body	Island	RA	Unmethy	-1.97863	Unmethy	-2.05961	Unmethy	-2.0493	Unmethy	-2.14073	Unmethy	-2.25012	Margin	-1.75	Unmethy	-2.26956	Unmethy	-2.10197	Unmethy	-2.18306	Unmethy	-2.06099
cg06212945	6	29904360	HLA-G	NM_002127	Body	Island	RA	Unmethy	-1.92487	Unmethy	-1.95219	Unmethy	-2.10315	Unmethy	-2.06569	Unmethy	-2.16783	Margin	-1.74312	Unmethy	-2.27046	Unmethy	-2.14592	Unmethy	-2.15231	Unmethy	-2.06564
cg13130352	6	29904473	HLA-G	NM_002127	Body	Island	RA	Margin	0.760128	Margin	0.888932	Margin	0.9256	Methy	0.992094	Methy	0.988981	Margin	1.13021	Methy	0.749753	Methy	0.803967	Margin	0.620494	Margin	0.712007
cg12358432	6	29904572	HLA-G	NM_002127	Body	Island	RA	Methy	1.22202	Methy	1.04414	Margin	0.96914	Margin	0.90737	Methy	1.13317	Methy	1.20937	Methy	0.882348	Methy	1.00873	Methy	1.02745	Margin	0.789782
cg03298800	6	29904749	HLA-G	NM_002127	Body	S_Shore	RA	Margin	0.660393	Margin	0.342565	Margin	-0.589893	Margin	-1.22323	Margin	-0.226284	Margin	0.369109	Methy	0.778798	Methy	0.798636	Methy	0.951214	Margin	0.8134
cg19729479	6	29905258	HLA-G	NM_002127	Body	S_Shore	RA	Margin	0.910064	Margin	0.614316	Margin	0.376512	Margin	-0.111782	Margin	0.253853	Margin	0.739992	Methy	1.25125	Methy	1.19859	Methy	1.33941	Methy	1.35559
cg08304101	6	29905399	HLA-G	NM_002127	Body	S_Shore	RA	Margin	0.759285	Margin	0.834147	Margin	0.924652	Margin	0.569939	Margin	0.54596	Margin	0.586765	Methy	0.759258	Methy	0.930677	Margin	0.780495	Margin	0.85695
cg25138053	6	31475995	NA	NA	NA	S_Shore	RA	Unmethy	-2.20195	Margin	-1.58576	Unmethy	-2.5701	Unmethy	-2.1723	Unmethy	-2.3691	Unmethy	-2.5257	Unmethy	-2.30151	Unmethy	-2.20521	Unmethy	-2.37166	Unmethy	-2.35494
cg05651282	6	31478679	MICA	NM_000247	TSS1500	N_Shore	RA	Margin	-1.78036	Unmethy	-2.03889	Unmethy	-2.06822	Unmethy	-2.56055	Margin	-1.68674	Unmethy	-2.59233	Margin	-1.81031	Margin	-1.84633	Unmethy	-1.7152	Unmethy	-1.75209
cg03256310	6	31479728	MICA	NM_000247	Body	Island	RA	Margin	-1.48708	Margin	-1.28535	Margin	-1.1136	Margin	-0.717056	Margin	-1.21573	Margin	-1.17315	Margin	-1.70411	Margin	-1.8007	Unmethy	-1.79277	Unmethy	-1.75716
cg08866144	6	31479763	MICA	NM_000247	Body	Island	RA	Margin	-1.7963	Unmethy	-2.02813	Unmethy	-1.97554	Margin	-1.78351	Margin	-1.8213	Unmethy	-1.90182	Margin	-1.74206	Margin	-1.81576	Unmethy	-1.86641	Unmethy	-1.94903
cg27144224	6	31479816	MICA	NM_000247	Body	Island	RA	Unmethy	-2.61711	Unmethy	-2.70886	Unmethy	-2.32385	Margin	-1.77805	Unmethy	-2.6772	Unmethy	-2.85476	Unmethy	-3.05801	Unmethy	-3.23826	Unmethy	-2.9718	Unmethy	-3.59444
cg23826579	6	31481911	MICA	NM_000247	Body	S_Shelf	RA	Margin	0.594701	Margin	0.767725	Margin	0.723652	Margin	0.481708	Margin	0.758142	Margin	0.743037	Margin	0.389161	Margin	0.393606	Margin	0.901374	Methy	1.05733
cg11268327	6	31488177	MICA	NM_000247	Body	NA	RA	Margin	0.77879	Margin	0.962736	Margin	0.853735	Margin	0.62161	Methy	0.992641	Margin	0.86187	Methy	0.84389	Methy	0.925843	Margin	0.888703	Margin	0.781493
cg27527338	6	31489519	MICA	NM_000247	Body	NA	RA	Methy	1.09891	Methy	1.95385	Methy	2.16461	Methy	1.79319	Methy	1.72963	Methy	2.12064	Methy	1.68404	Margin	0.571638	Margin	0.86794	Methy	1.48857
cg12182649	6	31489758	MICA	NM_000247	Body	NA	RA	Margin	0.776176	Methy	2.11903	Methy	2.53347	Methy	2.56013	Methy	2.60709	Methy	2.72265	Methy	1.28016	Margin	-0.161304	Margin	0.441968	Methy	1.47406
cg20144487	6	31490006	MICA	NM_000247	Body	NA	RA	Margin	0.904106	Methy	1.05968	Margin	0.952787	Margin	0.78132	Methy	0.994467	Margin	0.948584	Methy	0.837598	Methy	0.828957	Margin	0.819791	Margin	0.756648
cg20640261	6	31814998	MSH5;MSH5;MSH5;MSH5	NM_025259;NM_002441;NM_172165;NM_172166	TSS1500;TSS1500;TSS1500;TSS1500	N_Shore	SLE	Margin	0.132822	Margin	0.702433	Methy	2.25825	Methy	1.48737	Margin	0.359446	Margin	-0.512539	Margin	-0.720451	Margin	-0.707332	Margin	-0.63734	Margin	-0.723562
cg07801569	6	31815130	MSH5;MSH5;MSH5;MSH5	NM_025259;NM_002441;NM_172165;NM_172166	TSS1500;TSS1500;TSS1500;TSS1500	N_Shore	SLE	Unmethy	-2.77051	Unmethy	-2.03608	Margin	-1.42336	Margin	-1.85273	Unmethy	-2.25507	Unmethy	-2.61695	Unmethy	-3.29686	Unmethy	-2.8929	Unmethy	-3.14264	Unmethy	-3.51457
cg00640087	6	31815181	MSH5;MSH5;MSH5;MSH5	NM_025259;NM_002441;NM_172165;NM_172166	TSS1500;TSS1500;TSS1500;TSS1500	N_Shore	SLE	Unmethy	-1.94457	Margin	-1.17164	Margin	-0.167238	Margin	-0.486524	Margin	-1.66979	Unmethy	-2.12936	Unmethy	-3.61961	Unmethy	-3.57312	Unmethy	-3.61273	Unmethy	-3.54532
cg14658948	6	31816266	MSH5;MSH5;MSH5;MSH5	NM_172165;NM_025259;NM_002441;NM_172166	Body;Body;Body;Body	Island	SLE	Margin	-1.44889	Margin	-1.63047	Margin	-1.58234	Margin	-1.66692	Margin	-1.77386	Margin	-1.66655	Margin	-1.59255	Margin	-1.5275	Unmethy	-1.8297	Unmethy	-1.76857
cg19868934	6	31837700	MSH5;MSH5;C6orf26;MSH5;MSH5	NM_172165;NM_025259;NM_001039651;NM_002441;NM_172166	Body;Body;TSS1500;Body;Body	NA	SLE	Methy	1.0657	Methy	1.59718	Methy	1.68343	Methy	1.3022	Methy	1.08001	Methy	2.13358	Methy	1.67242	Margin	0.669102	Margin	0.744635	Margin	0.715237
cg01835021	6	31838239	MSH5;MSH5;C6orf26;MSH5;MSH5	NM_172165;NM_025259;NM_001039651;NM_002441;NM_172166	Body;Body;TSS1500;Body;Body	NA	SLE	Margin	0.840205	Margin	0.962152	Margin	0.928386	Margin	0.705649	Margin	0.666352	Margin	0.823782	Methy	0.765764	Methy	0.73978	Margin	0.704677	Margin	0.784183
cg21722170	6	32085421	TNXB;TNXA	NM_032470;NR_001284	Body;Body	NA	SLE	Methy	1.30268	Methy	1.29691	Methy	1.02341	Margin	0.448306	Margin	0.574018	Methy	1.19066	Methy	1.67882	Methy	1.59184	Methy	1.75972	Methy	1.81804
cg25437180	6	32088024	TNXB;STK19;TNXA;STK19	NM_032470;NM_004197;NR_001284;NM_032454	1stExon;TSS1500;Body;TSS1500	NA	SLE	Margin	0.895479	Methy	1.08473	Methy	0.988873	Margin	0.873771	Margin	0.974042	Margin	0.947837	Methy	0.915614	Methy	0.95797	Methy	0.964135	Margin	0.798964
cg23463700	6	32261518	PBX2	NM_002586	3'UTR	NA	Asthma	Methy	1.52259	Methy	1.27651	Margin	0.849403	Margin	0.855432	Methy	1.43224	Methy	1.47215	Methy	1.0336	Methy	1.6948	Methy	1.52432	Methy	0.991233
cg19376664	6	32261553	PBX2	NM_002586	3'UTR	NA	Asthma	Methy	1.98195	Methy	1.08536	Margin	0.420569	Margin	0.340375	Methy	1.46211	Methy	1.42573	Methy	2.56183	Methy	3.10111	Methy	2.83303	Methy	1.73541
cg14538532	6	32261635	PBX2	NM_002586	3'UTR	NA	Asthma	Methy	1.54208	Methy	1.54936	Methy	1.03052	Margin	0.907865	Methy	1.72584	Methy	1.45958	Methy	1.8743	Methy	1.79337	Methy	1.83195	Methy	1.54637
cg18057469	6	32262394	PBX2	NM_002586	Body	NA	Asthma	Methy	1.21582	Methy	1.24758	Methy	1.05782	Margin	0.855144	Methy	1.28629	Methy	1.26167	Methy	1.34561	Methy	1.22913	Methy	1.41601	Methy	1.38398
cg14635654	6	32262425	PBX2	NM_002586	Body	NA	Asthma	Methy	0.970092	Methy	1.29492	Methy	1.02067	Methy	1.39753	Methy	1.76653	Margin	0.939269	Methy	1.10488	Methy	0.999347	Methy	0.981665	Methy	1.06331
cg03422527	6	32262546	PBX2	NM_002586	Body	NA	Asthma	Margin	0.783959	Methy	1.03638	Margin	0.959832	Methy	1.35507	Methy	1.53102	Methy	1.25916	Methy	0.983806	Methy	0.695485	Margin	0.671395	Margin	0.835348
cg20765522	6	32262693	PBX2	NM_002586	Body	NA	Asthma	Margin	-0.693726	Margin	-0.160747	Margin	0.177031	Margin	0.374053	Margin	0.761664	Margin	0.574321	Unmethy	-2.03572	Margin	-1.6498	Margin	-1.39913	Margin	-0.538052
cg12660777	6	32262811	PBX2	NM_002586	Body	NA	Asthma	Unmethy	-2.02762	Margin	-1.52249	Margin	-1.42421	Margin	-1.102	Margin	-0.932133	Margin	-1.58116	Unmethy	-3.11864	Unmethy	-2.88675	Unmethy	-2.7699	Unmethy	-2.29468
cg09001226	6	32263060	PBX2	NM_002586	Body	NA	Asthma	Margin	-1.46895	Margin	-0.46017	Margin	0.0925225	Margin	0.672615	Methy	2.31581	Margin	-1.43173	Unmethy	-4.09628	Unmethy	-3.37776	Unmethy	-3.51079	Unmethy	-2.98526
cg00869530	6	32263102	PBX2	NM_002586	Body	NA	Asthma	Margin	0.813965	Methy	1.19636	Methy	1.07351	Methy	1.36084	Methy	1.77832	Margin	1.1643	Margin	0.563976	Margin	0.645236	Margin	0.838358	Methy	1.18629
cg04363228	6	32263119	PBX2	NM_002586	Body	NA	Asthma	Margin	0.49151	Margin	0.91664	Margin	0.769538	Methy	1.37328	Methy	2.38662	Margin	1.01708	Margin	0.100503	Margin	0.161168	Margin	0.282086	Margin	0.650324
cg14851325	6	32264078	PBX2	NM_002586	Body	NA	Asthma	Methy	6.10468	Unmethy	6.01901	Unmethy	6.33254	Unmethy	6.31392	Unmethy	6.5269	Methy	6.24542	Methy	5.95965	Methy	6.26448	Methy	6.01006	Methy	5.88719
cg05525649	6	32264247	PBX2	NM_002586	Body	NA	Asthma	Margin	0.626927	Margin	0.868164	Methy	1.27095	Methy	1.6599	Methy	1.6486	Methy	1.37376	Margin	0.501611	Margin	0.424763	Margin	0.517994	Margin	0.655958
cg08293075	6	32264272	PBX2	NM_002586	Body	NA	Asthma	Margin	0.727325	Methy	1.05883	Methy	1.10813	Methy	1.2176	Methy	1.62449	Methy	1.54185	Methy	0.676197	Margin	0.515523	Margin	0.643536	Margin	0.741566
cg03426888	6	32264505	PBX2	NM_002586	Body	NA	Asthma	Margin	-1.17346	Margin	-0.70284	Margin	-0.887968	Margin	-0.0789224	Margin	0.41767	Margin	0.0567273	Unmethy	-2.11139	Unmethy	-2.0247	Unmethy	-1.85167	Margin	-1.06391
cg25978487	6	32265128	PBX2	NM_002586	Body	NA	Asthma	Unmethy	-2.45555	Unmethy	-2.38665	Unmethy	-2.15895	Unmethy	-2.13843	Margin	-1.69061	Unmethy	-2.85121	Unmethy	-3.01296	Unmethy	-2.90617	Unmethy	-2.75212	Unmethy	-2.76649
cg01246676	6	32265174	PBX2	NM_002586	Body	NA	Asthma	Margin	-1.85431	Unmethy	-1.8772	Unmethy	-1.79325	Margin	-1.96132	Unmethy	-1.96014	Unmethy	-1.82542	Margin	-1.87729	Margin	-1.88904	Unmethy	-1.91032	Unmethy	-2.00118
cg06431527	6	32266491	PBX2	NM_002586	TSS1500	NA	Asthma	Margin	-1.30411	Margin	-1.40961	Unmethy	-1.8739	Unmethy	-2.52984	Margin	-1.6907	Margin	-1.2406	Margin	-0.765006	Margin	-1.27355	Margin	-1.32853	Unmethy	-1.66014
cg17851795	6	32266905	PBX2;GPSM3	NM_002586;NM_022107	TSS1500;3'UTR	NA	Asthma	Methy	1.70847	Methy	1.44935	Margin	0.364537	Margin	0.723767	Methy	1.71945	Methy	2.09241	Methy	2.23597	Methy	2.04262	Methy	2.1033	Methy	2.06476
cg03280235	6	32266931	PBX2;GPSM3	NM_002586;NM_022107	TSS1500;3'UTR	NA	Asthma	Methy	1.05133	Margin	0.488352	Margin	-0.633945	Margin	-0.362876	Margin	0.767577	Margin	0.830842	Methy	1.85449	Methy	1.69126	Methy	1.73659	Methy	1.71145
cg16609995	6	32267014	PBX2;GPSM3	NM_002586;NM_022107	TSS1500;3'UTR	NA	Asthma	Margin	0.150798	Margin	-0.380511	Unmethy	-1.96268	Unmethy	-2.44166	Margin	-0.490569	Margin	0.519334	Methy	0.711719	Margin	0.629891	Margin	0.587833	Margin	0.174303
cg26301953	6	32272481	GPSM3;NOTCH4	NM_022107;NM_004557	TSS1500;Body	S_Shore	Asthma,RA,SLE	Margin	-1.43064	Margin	-0.926394	Margin	0.0871902	Margin	-0.593744	Margin	-1.45253	Unmethy	-2.60935	Unmethy	-3.19625	Unmethy	-2.83865	Unmethy	-3.15419	Unmethy	-3.59363
cg11747349	6	32272531	GPSM3;NOTCH4	NM_022107;NM_004557	TSS1500;Body	S_Shore	Asthma,RA,SLE	Unmethy	-3.04019	Unmethy	-2.24998	Margin	-0.963715	Margin	-1.51134	Unmethy	-3.21807	Unmethy	-4.54832	Unmethy	-4.94107	Unmethy	-4.74933	Unmethy	-5.08142	Unmethy	-5.92911
cg15147479	6	32272547	GPSM3;NOTCH4	NM_022107;NM_004557	TSS1500;Body	S_Shore	Asthma,RA,SLE	Unmethy	-2.64212	Unmethy	-2.01955	Margin	-1.32245	Margin	-1.78213	Unmethy	-2.56463	Unmethy	-3.29826	Unmethy	-3.47054	Unmethy	-3.34468	Unmethy	-3.57911	Unmethy	-3.65748
cg18689504	6	32272563	GPSM3;NOTCH4	NM_022107;NM_004557	TSS1500;Body	S_Shore	Asthma,RA,SLE	Unmethy	-1.91239	Margin	-1.14999	Margin	-0.494327	Margin	-0.919913	Margin	-1.82132	Unmethy	-2.40444	Unmethy	-3.2511	Unmethy	-3.04708	Unmethy	-3.17839	Unmethy	-3.49797
cg16513215	6	32272566	GPSM3;NOTCH4	NM_022107;NM_004557	TSS1500;Body	S_Shore	Asthma,RA,SLE	Unmethy	-2.78179	Unmethy	-1.9919	Margin	-1.34626	Margin	-1.93776	Unmethy	-2.60169	Unmethy	-3.09265	Unmethy	-3.51282	Unmethy	-3.4321	Unmethy	-3.4817	Unmethy	-3.58197
cg12401918	6	32272701	GPSM3;NOTCH4	NM_022107;NM_004557	TSS1500;Body	S_Shore	Asthma,RA,SLE	Margin	-1.27133	Margin	-0.341745	Margin	0.762944	Margin	0.557744	Margin	-0.497732	Margin	-1.60318	Unmethy	-2.92353	Unmethy	-2.85974	Unmethy	-3.19264	Unmethy	-3.2836
cg06023661	6	32272779	NOTCH4	NM_004557	Body	S_Shore	Asthma,RA,SLE	Margin	-0.542055	Margin	0.323112	Methy	2.43301	Methy	1.95182	Margin	0.0716611	Margin	-0.932342	Unmethy	-2.37969	Unmethy	-2.07328	Unmethy	-2.26383	Unmethy	-3.46839
cg06815976	6	32272794	NOTCH4	NM_004557	Body	S_Shore	Asthma,RA,SLE	Margin	-0.403415	Margin	0.0110466	Methy	1.2292	Methy	1.14672	Margin	-0.122797	Margin	-0.533819	Margin	-1.34176	Margin	-1.09957	Margin	-1.31068	Unmethy	-1.94782
cg11025918	6	32273161	NOTCH4	NM_004557	Body	S_Shore	Asthma,RA,SLE	Margin	0.501439	Margin	0.725288	Methy	0.986195	Margin	0.886195	Margin	0.944042	Margin	0.326955	Margin	0.317339	Margin	0.31337	Margin	0.333078	Margin	0.377616
cg06891815	6	32273215	NOTCH4	NM_004557	Body	S_Shore	Asthma,RA,SLE	Methy	1.5823	Methy	1.88272	Methy	2.15837	Methy	2.2898	Methy	2.12552	Margin	0.875847	Methy	1.43178	Methy	1.56123	Methy	1.55329	Methy	1.57209
cg13185046	6	32273299	NOTCH4	NM_004557	Body	S_Shore	Asthma,RA,SLE	Margin	-0.491605	Margin	0.439371	Methy	1.48713	Methy	1.54819	Margin	0.931724	Margin	0.645066	Unmethy	-2.87268	Unmethy	-2.02909	Unmethy	-2.31712	Unmethy	-2.46321
cg12120947	6	32274630	NOTCH4	NM_004557	Body	S_Shelf	Asthma,RA,SLE	Methy	3.34571	Methy	3.44024	Methy	3.5732	Methy	3.58546	Methy	3.49964	Methy	3.75661	Methy	3.43791	Methy	3.02122	Methy	2.32034	Margin	0.501773
cg25994616	6	32274717	NOTCH4	NM_004557	Body	S_Shelf	Asthma,RA,SLE	Methy	5.84612	Margin	5.91945	Methy	5.73933	Margin	5.69188	Methy	5.45592	Methy	5.777	Methy	5.98212	Methy	5.83398	Methy	6.01958	Methy	5.73527
cg01108614	6	32274741	NOTCH4	NM_004557	Body	S_Shelf	Asthma,RA,SLE	Methy	6.11937	Unmethy	6.24779	Unmethy	6.13636	Unmethy	6.0918	Unmethy	5.93682	Methy	6.08234	Methy	6.39537	Methy	6.34313	Methy	5.98552	Unmethy	6.42091
cg05881416	6	32274747	NOTCH4	NM_004557	Body	S_Shelf	Asthma,RA,SLE	Methy	5.80162	Methy	5.71039	Methy	5.91105	Margin	5.66767	Unmethy	6.1215	Methy	5.8269	Methy	5.58987	Methy	5.52324	Margin	6.09881	Methy	5.84317
cg11731745	6	32274750	NOTCH4	NM_004557	Body	S_Shelf	Asthma,RA,SLE	Methy	6.12414	Unmethy	6.3729	Unmethy	6.41173	Unmethy	6.05412	Unmethy	6.49177	Methy	6.6067	Methy	6.48438	Methy	6.69065	Unmethy	6.38979	Margin	6.24939
cg01220720	6	32274998	NOTCH4	NM_004557	Body	S_Shelf	Asthma,RA,SLE	Margin	0.632125	Margin	0.722428	Margin	0.690715	Margin	0.388215	Margin	0.560269	Margin	0.613033	Margin	0.583429	Margin	0.560995	Methy	0.970629	Methy	0.870932
cg16599983	6	32276947	NOTCH4	NM_004557	Body	NA	Asthma,RA,SLE	Methy	1.49066	Methy	1.26439	Methy	1.13814	Margin	0.424719	Margin	0.542204	Methy	1.3521	Methy	2.09451	Methy	2.05547	Methy	2.27155	Methy	2.27614
cg23893346	6	32277856	NOTCH4	NM_004557	Body	NA	Asthma,RA,SLE	Methy	1.20822	Methy	1.08771	Margin	0.851611	Margin	0.453051	Margin	0.424969	Margin	1.14645	Methy	1.41062	Methy	1.43148	Methy	1.68039	Methy	1.69664
cg14614539	6	32278436	NOTCH4	NM_004557	Body	NA	Asthma,RA,SLE	Methy	2.12242	Methy	2.52042	Methy	2.20216	Methy	1.89626	Methy	2.26421	Methy	3.35247	Methy	2.50405	Methy	1.95333	Methy	1.74207	Margin	-1.03858
cg16062253	6	32278472	NOTCH4	NM_004557	Body	NA	Asthma,RA,SLE	Methy	1.83574	Methy	2.86022	Methy	3.61667	Methy	3.41179	Methy	3.56959	Methy	4.16486	Methy	2.21973	Methy	0.913466	Margin	0.475511	Unmethy	-1.54331
cg18244508	6	32280849	NOTCH4	NM_004557	Body	NA	Asthma,RA,SLE	Margin	0.552734	Methy	1.16477	Methy	1.27793	Margin	0.770208	Margin	0.754982	Methy	1.48307	Methy	1.27786	Margin	0.105922	Margin	0.194675	Margin	0.249708
cg23089723	6	32285995	NOTCH4	NM_004557	Body	NA	Asthma,RA,SLE	Margin	0.875647	Margin	0.745192	Margin	0.530438	Margin	0.120543	Margin	0.142367	Margin	1.0959	Methy	1.13269	Methy	1.2226	Methy	1.33004	Methy	1.3249
cg23585168	6	32286193	NOTCH4	NM_004557	Body	NA	Asthma,RA,SLE	Margin	0.764538	Margin	0.554157	Margin	0.375193	Margin	-0.182652	Margin	-0.0604231	Margin	0.765033	Methy	1.09635	Methy	1.01124	Methy	1.18863	Methy	1.16766
cg12106346	6	32286969	NOTCH4	NM_004557	Body	NA	Asthma,RA,SLE	Methy	1.2499	Margin	0.737104	Margin	0.735159	Margin	0.261719	Margin	0.488445	Margin	0.69088	Methy	1.0678	Methy	1.36109	Methy	1.36812	Methy	1.65961
cg07637554	6	32287949	NOTCH4	NM_004557	Body	NA	Asthma,RA,SLE	Methy	0.954449	Methy	1.64469	Methy	2.00825	Methy	1.03518	Methy	1.36172	Methy	1.54891	Methy	1.68586	Margin	0.195065	Margin	0.525777	Methy	2.02137
cg20241876	6	32288023	NOTCH4	NM_004557	Body	NA	Asthma,RA,SLE	Margin	-0.308695	Methy	1.0387	Methy	1.95175	Methy	1.52448	Margin	0.855867	Methy	2.96363	Margin	0.426331	Unmethy	-2.27768	Unmethy	-2.37672	Margin	-1.3637
cg22155039	6	32289980	NOTCH4	NM_004557	Body	NA	Asthma,RA,SLE	Margin	0.424474	Methy	1.06966	Methy	2.47403	Methy	2.16972	Methy	1.18646	Margin	0.545641	Margin	-0.52016	Margin	-0.212247	Margin	-0.555234	Margin	-0.522251
cg16602097	6	32289991	NOTCH4	NM_004557	Body	NA	Asthma,RA,SLE	Margin	-0.538084	Margin	0.408222	Methy	2.28908	Methy	2.10212	Margin	0.757905	Margin	-0.77897	Unmethy	-2.71145	Unmethy	-2.14108	Unmethy	-2.46662	Unmethy	-2.47183
cg21462693	6	32290152	NOTCH4	NM_004557	Body	NA	Asthma,RA,SLE	Margin	0.292909	Margin	0.706512	Methy	1.33468	Methy	1.31111	Margin	0.716703	Margin	-0.0199089	Margin	-0.197819	Margin	-0.0924299	Margin	-0.25102	Margin	-0.414491
cg12172531	6	32292274	NOTCH4	NM_004557	Body	NA	Asthma,RA,SLE	Methy	2.20499	Methy	1.92657	Methy	1.55888	Margin	0.871035	Margin	0.941847	Methy	2.24817	Methy	2.26178	Methy	2.44966	Methy	2.45362	Methy	2.26325
cg06535498	6	32293149	NOTCH4	NM_004557	Body	NA	Asthma,RA,SLE	Methy	2.29554	Methy	2.17584	Methy	2.27611	Methy	1.71774	Methy	1.64936	Margin	0.913561	Methy	2.52461	Methy	2.59969	Methy	2.65373	Methy	2.66331
cg24446242	6	32293318	NOTCH4	NM_004557	Body	NA	Asthma,RA,SLE	Methy	1.76319	Methy	1.51712	Methy	1.62734	Margin	0.852315	Margin	0.841128	Margin	0.909547	Methy	2.33819	Methy	1.97058	Methy	2.12668	Methy	2.03948
cg20655068	6	32296165	NOTCH4	NM_004557	Body	NA	Asthma,RA,SLE	Margin	0.825739	Margin	0.795408	Margin	0.520562	Margin	0.212127	Margin	0.195013	Methy	1.35375	Methy	1.34489	Methy	1.28271	Methy	1.39749	Methy	1.60852
cg24697648	6	32296295	NOTCH4	NM_004557	Body	NA	Asthma,RA,SLE	Methy	1.08507	Margin	0.96214	Margin	0.712476	Margin	0.04408	Margin	0.138154	Methy	1.32381	Methy	1.6617	Methy	1.57457	Methy	1.69615	Methy	1.78063
cg13096809	6	32297104	NOTCH4	NM_004557	Body	NA	Asthma,RA,SLE	Methy	1.89157	Methy	1.69742	Methy	1.90288	Methy	0.96452	Methy	1.09361	Margin	0.695692	Methy	2.04915	Methy	1.9454	Methy	2.07599	Methy	1.69667
cg16072814	6	32297375	NOTCH4	NM_004557	Body	NA	Asthma,RA,SLE	Methy	1.66675	Methy	1.55402	Methy	1.71746	Methy	1.16407	Methy	1.23123	Margin	0.153505	Methy	2.12826	Methy	1.85366	Methy	1.95332	Methy	1.61139
cg08130490	6	32297536	NOTCH4	NM_004557	Body	NA	Asthma,RA,SLE	Methy	3.74637	Methy	3.31502	Methy	3.94738	Methy	3.76119	Methy	3.71927	Margin	0.973911	Methy	3.89518	Methy	3.74358	Methy	3.94274	Methy	3.81412
cg16809040	6	32297588	NOTCH4	NM_004557	Body	NA	Asthma,RA,SLE	Methy	2.08557	Methy	1.88014	Methy	2.20061	Methy	1.26403	Methy	1.59075	Margin	-0.01712	Methy	2.32416	Methy	2.29374	Methy	2.53747	Methy	2.42849
cg07725183	6	32298534	NOTCH4	NM_004557	Body	NA	Asthma,RA,SLE	Margin	-0.602814	Margin	-1.31404	Unmethy	-2.10193	Margin	-1.18229	Margin	0.180952	Unmethy	-2.83383	Unmethy	-2.02303	Margin	-0.496283	Margin	-0.377867	Margin	0.00319481
cg14700707	6	32299818	NOTCH4;NOTCH4	NM_004557;NM_004557	1stExon;5'UTR	NA	Asthma,RA,SLE	Margin	-1.24097	Margin	-0.574354	Margin	0.161745	Margin	-0.10128	Margin	-0.405449	Margin	-1.24155	Unmethy	-2.92328	Unmethy	-2.75268	Unmethy	-2.48724	Unmethy	-1.97185
cg05973262	6	32299873	NOTCH4	NM_004557	TSS200	NA	Asthma,RA,SLE	Margin	0.367112	Margin	0.974946	Methy	1.63371	Methy	1.53601	Methy	1.08485	Margin	1.09981	Margin	0.149491	Margin	-0.0843618	Margin	0.0716106	Margin	0.136838
cg07822788	6	32300328	NOTCH4	NM_004557	TSS1500	NA	Asthma,RA,SLE	Margin	0.684742	Margin	0.923241	Methy	1.53308	Methy	1.12803	Margin	0.843541	Margin	0.0610209	Margin	0.237694	Margin	0.292625	Margin	0.266007	Margin	0.258678
cg02662596	6	32300488	NOTCH4	NM_004557	TSS1500	NA	Asthma,RA,SLE	Methy	2.56878	Methy	2.08643	Methy	2.66649	Methy	2.84561	Methy	2.44367	Margin	-0.574987	Methy	1.08304	Methy	2.63898	Methy	2.84903	Methy	2.88009
cg10187879	6	32331186	NA	NA	NA	NA	RA,SLE	Unmethy	-3.02251	Unmethy	-2.57152	Unmethy	-2.17534	Margin	-1.84846	Unmethy	-2.71955	Unmethy	-2.31416	Unmethy	-3.43606	Unmethy	-3.61642	Unmethy	-3.25375	Unmethy	-3.3765
cg01665970	6	32377456	C6orf10	NM_006781	Body	NA	RA,SLE	Methy	0.979367	Methy	1.16322	Methy	1.11479	Margin	0.710419	Margin	0.732937	Margin	1.10913	Methy	0.840189	Methy	0.875067	Methy	1.22088	Methy	1.25298
cg00874877	6	32380028	C6orf10	NM_006781	Body	NA	RA,SLE	Methy	1.9379	Methy	1.45354	Margin	0.409635	Margin	-0.549326	Methy	1.01739	Methy	2.68171	Methy	2.98413	Methy	2.59491	Methy	2.63555	Methy	2.91627
cg19717943	6	32381353	C6orf10	NM_006781	Body	NA	RA,SLE	Methy	0.935288	Margin	0.998554	Methy	1.00443	Margin	0.688829	Margin	0.849909	Margin	0.895783	Methy	1.04284	Methy	1.10168	Methy	1.11834	Methy	1.19286
cg22499572	6	32391818	C6orf10	NM_006781	Body	NA	RA,SLE	Methy	2.55022	Methy	2.82395	Methy	2.7308	Methy	2.33782	Methy	2.38528	Methy	3.48701	Methy	2.88854	Methy	2.69369	Methy	1.97873	Margin	0.299864
cg23070665	6	32401185	C6orf10	NM_006781	Body	NA	RA,SLE	Methy	1.04806	Methy	1.15039	Methy	1.17391	Margin	0.822606	Methy	1.0158	Margin	0.889397	Methy	1.01412	Methy	1.10627	Methy	1.10526	Methy	1.19108
cg21534942	6	32401556	C6orf10	NM_006781	Body	NA	RA,SLE	Methy	1.73421	Methy	1.32959	Methy	1.2451	Margin	0.657209	Margin	0.492576	Methy	1.18676	Methy	1.37966	Methy	1.66348	Methy	1.58623	Methy	1.62798
cg06192961	6	32402448	C6orf10	NM_006781	Body	NA	RA,SLE	Margin	-0.771166	Margin	-0.206747	Margin	0.59486	Margin	0.456461	Margin	0.0710945	Margin	-0.0205787	Margin	-1.18491	Margin	-1.57378	Unmethy	-1.80782	Unmethy	-2.45562
cg17039645	6	32402481	C6orf10	NM_006781	Body	NA	RA,SLE	Margin	0.450306	Methy	1.47159	Methy	2.77233	Methy	3.16619	Methy	2.17363	Methy	2.09798	Margin	0.189102	Margin	-0.323812	Margin	-0.24503	Margin	-0.233885
cg21325723	6	32402555	C6orf10	NM_006781	Body	NA	RA,SLE	Methy	1.01845	Methy	1.97454	Methy	2.77341	Methy	3.14266	Methy	2.65689	Methy	1.95628	Margin	0.395381	Margin	0.322436	Margin	0.42162	Margin	0.204629
cg01937212	6	32403075	C6orf10	NM_006781	Body	NA	RA,SLE	Margin	-1.2372	Margin	-0.665273	Margin	-0.373881	Margin	-0.272312	Margin	-0.871778	Margin	-1.37193	Margin	-1.78902	Margin	-1.73266	Unmethy	-1.96786	Unmethy	-2.35388
cg20795701	6	32403207	C6orf10	NM_006781	Body	NA	RA,SLE	Margin	-0.192102	Margin	0.93849	Methy	1.80764	Methy	1.94255	Methy	1.55566	Margin	0.0194615	Margin	-0.95751	Margin	-1.18325	Unmethy	-1.54142	Unmethy	-1.77953
cg21587984	6	32403215	C6orf10	NM_006781	Body	NA	RA,SLE	Margin	-0.119614	Margin	0.759652	Methy	2.37833	Methy	2.24003	Methy	1.6227	Margin	-0.395885	Margin	-1.30578	Margin	-1.52527	Unmethy	-1.81363	Unmethy	-2.0752
cg17201409	6	32407595	C6orf10	NM_006781	Body	NA	RA,SLE	Methy	2.04173	Methy	1.70886	Methy	2.21657	Methy	2.01306	Methy	1.92936	Methy	1.44009	Margin	-0.239345	Methy	1.87421	Methy	2.03393	Methy	1.80959
cg06545464	6	32407627	C6orf10	NM_006781	Body	NA	RA,SLE	Methy	1.89363	Methy	1.36519	Methy	2.08938	Methy	2.25935	Methy	1.79398	Margin	0.875849	Margin	-0.43778	Methy	2.32212	Methy	2.50074	Methy	2.50472
cg20966357	6	32407654	C6orf10	NM_006781	Body	NA	RA,SLE	Methy	2.81975	Methy	1.62596	Methy	3.19468	Methy	3.5924	Methy	2.71489	Margin	-0.590797	Margin	-1.65959	Methy	2.92022	Methy	3.33621	Methy	3.07075
cg02808240	6	32412121	C6orf10	NM_006781	Body	NA	RA,SLE	Margin	-0.0960295	Margin	0.958347	Methy	1.79423	Methy	1.49254	Methy	1.1086	Methy	2.81073	Margin	-0.29397	Margin	-1.41767	Unmethy	-1.55509	Unmethy	-1.79077
cg20636526	6	32413123	C6orf10	NM_006781	Body	NA	RA,SLE	Methy	1.16681	Methy	2.12272	Methy	3.00558	Methy	2.88084	Methy	2.78677	Methy	1.51896	Methy	1.2535	Margin	0.386867	Margin	0.552365	Margin	0.696296
cg13279700	6	32421561	C6orf10	NM_006781	Body	NA	RA,SLE	Methy	2.3859	Methy	1.70663	Methy	1.20038	Margin	0.391217	Margin	0.132173	Methy	1.49378	Methy	3.11522	Methy	3.35245	Methy	3.26767	Methy	3.833
cg18880384	6	32473091	BTNL2	NM_019602	Body	NA	Asthma	Methy	2.02178	Methy	1.37485	Methy	1.60711	Methy	1.20811	Methy	1.17843	Margin	-0.530403	Methy	1.17382	Methy	2.75052	Methy	2.71066	Methy	2.11392
cg06513958	6	32473469	BTNL2	NM_019602	Body	NA	Asthma	Methy	2.72801	Methy	2.58023	Methy	2.49724	Methy	2.15021	Methy	2.2139	Margin	0.817279	Methy	3.08354	Methy	3.09041	Methy	3.16003	Methy	2.91134
cg19117063	6	32473531	BTNL2	NM_019602	Body	NA	Asthma	Methy	2.13277	Methy	1.74113	Methy	1.81011	Margin	0.770221	Methy	1.01021	Margin	0.462477	Methy	2.7516	Methy	2.38414	Methy	2.24683	Methy	2.44371
cg22489198	6	32476460	BTNL2	NM_019602	Body	NA	Asthma	Margin	0.860855	Margin	0.875161	Margin	0.977771	Margin	0.818851	Margin	0.922695	Margin	0.869304	Methy	0.919975	Methy	0.911132	Methy	1.20031	Methy	1.2611
cg17961273	6	32478615	BTNL2	NM_019602	Body	NA	Asthma	Methy	0.995954	Margin	0.744381	Margin	0.330113	Margin	-0.183699	Margin	0.055293	Methy	1.63889	Methy	1.3771	Methy	1.27893	Methy	1.27114	Methy	1.24998
cg24911364	6	32480214	BTNL2	NM_019602	Body	NA	Asthma	Methy	1.98194	Methy	1.81894	Methy	1.52371	Methy	1.22033	Margin	0.934743	Methy	2.00567	Methy	1.84354	Methy	1.98962	Methy	1.88566	Methy	1.94081
cg26805579	6	32480940	BTNL2	NM_019602	Body	NA	Asthma	Methy	1.33815	Methy	1.40349	Methy	1.26818	Methy	1.03676	Margin	0.905035	Margin	1.1253	Methy	1.67339	Methy	1.47828	Methy	1.58346	Methy	1.60032
cg26657086	6	32481067	BTNL2	NM_019602	Body	NA	Asthma	Methy	1.48778	Methy	1.33506	Methy	1.43066	Methy	1.01771	Methy	1.12165	Margin	0.715791	Methy	1.52202	Methy	1.41519	Methy	1.48914	Methy	1.28984
cg09514561	6	32481598	BTNL2	NM_019602	Body	NA	Asthma	Margin	0.749169	Margin	0.883448	Margin	0.743982	Margin	0.466492	Margin	0.289236	Methy	1.64016	Methy	0.902107	Methy	0.882802	Methy	0.923253	Margin	0.784811
cg25391023	6	32482732	BTNL2	NM_019602	Body	NA	Asthma	Methy	1.98134	Methy	1.59114	Methy	1.17769	Margin	0.54526	Margin	0.5252	Methy	2.25319	Methy	2.2697	Methy	2.22559	Methy	2.30739	Methy	2.40235
cg02158755	6	32483295	BTNL2	NM_019602	TSS1500	NA	Asthma	Margin	0.844325	Margin	0.641621	Margin	0.517536	Margin	0.151559	Margin	0.0827059	Margin	0.886364	Methy	0.972953	Methy	0.885608	Methy	1.09786	Methy	1.13283
cg18067840	6	32483650	BTNL2	NM_019602	TSS1500	NA	Asthma	Methy	1.30605	Methy	1.12341	Margin	0.7094	Margin	0.244791	Margin	0.351173	Methy	1.64161	Methy	1.85262	Methy	1.70611	Methy	1.82766	Methy	1.9438
cg25764570	6	32515267	HLA-DRA	NM_019111	TSS1500	NA	Asthma,RA,T1D	Margin	0.73385	Methy	1.4486	Methy	2.81295	Methy	3.0264	Methy	2.47681	Margin	-0.0965775	Margin	-0.228944	Margin	-0.0435174	Margin	-0.1244	Margin	-0.273583
cg20348196	6	32516262	HLA-DRA	NM_019111	Body	NA	Asthma,RA,T1D	Margin	-1.48916	Margin	-1.22658	Margin	-0.6735	Margin	-1.4104	Margin	-1.41327	Unmethy	-2.74216	Margin	-1.57003	Margin	-1.62907	Margin	-1.30522	Margin	-1.44161
cg03930097	6	32516574	HLA-DRA	NM_019111	Body	NA	Asthma,RA,T1D	Margin	0.0465923	Margin	0.305682	Methy	1.4289	Margin	0.757981	Margin	0.223155	Unmethy	-2.5343	Margin	-1.02283	Margin	-0.556253	Margin	-0.684569	Margin	-0.772332
cg00528492	6	32516841	HLA-DRA	NM_019111	Body	NA	Asthma,RA,T1D	Methy	2.25019	Methy	2.21306	Methy	3.0211	Methy	2.234	Methy	2.5957	Margin	-0.606489	Methy	1.90857	Methy	2.37014	Methy	2.48477	Methy	2.56565
cg23732629	6	32517364	HLA-DRA	NM_019111	Body	NA	Asthma,RA,T1D	Margin	0.797201	Margin	0.849336	Methy	1.72509	Methy	1.5333	Methy	1.40731	Unmethy	-1.84137	Margin	0.0846127	Margin	0.62229	Margin	0.638835	Margin	0.614962
cg17606183	6	32517391	HLA-DRA	NM_019111	Body	NA	Asthma,RA,T1D	Margin	0.867963	Methy	1.03409	Methy	1.8277	Methy	1.8179	Methy	1.60538	Margin	-1.62457	Margin	-0.107703	Margin	0.400432	Margin	0.374878	Margin	0.305757
cg13022993	6	32517834	HLA-DRA	NM_019111	Body	NA	Asthma,RA,T1D	Methy	2.54084	Methy	2.55442	Methy	3.06531	Methy	2.93401	Methy	2.84225	Margin	0.583216	Methy	2.05141	Methy	2.50711	Methy	2.32884	Methy	2.3373
cg00383136	6	32518225	HLA-DRA	NM_019111	Body	NA	Asthma,RA,T1D	Methy	1.52666	Methy	1.47352	Methy	1.26678	Methy	1.67264	Methy	1.66849	Margin	0.0152279	Methy	1.42932	Methy	1.59863	Methy	1.65589	Methy	1.8147
cg08882389	6	32518668	HLA-DRA	NM_019111	Body	NA	Asthma,RA,T1D	Methy	2.08973	Methy	1.85637	Methy	1.81895	Methy	2.2759	Methy	2.31387	Margin	1.10486	Methy	2.20512	Methy	2.00715	Methy	1.86416	Methy	1.79569
cg05500783	6	32518851	HLA-DRA	NM_019111	Body	NA	Asthma,RA,T1D	Methy	2.36202	Methy	2.1157	Methy	2.27254	Methy	2.18537	Methy	1.66141	Margin	1.06214	Methy	2.47877	Methy	2.13755	Methy	2.07877	Methy	1.25137
cg25645491	6	32519045	HLA-DRA	NM_019111	Body	NA	Asthma,RA,T1D	Methy	1.39928	Methy	1.52694	Methy	1.97694	Methy	1.42065	Margin	0.801084	Margin	0.992831	Methy	1.43353	Methy	1.27574	Methy	1.33114	Methy	1.28358
cg13081526	6	32557939	NA	NA	NA	NA	RA	Margin	0.838226	Margin	0.968287	Methy	1.47903	Methy	1.53506	Methy	1.1022	Margin	1.11658	Margin	0.22053	Margin	0.298246	Margin	0.680159	Margin	0.305798
cg00119778	6	32574425	NA	NA	NA	NA	RA	Margin	-1.80719	Margin	-1.64534	Margin	-1.48168	Margin	-1.75723	Margin	-1.71966	Unmethy	-2.06107	Unmethy	-2.12843	Unmethy	-1.98917	Unmethy	-1.75714	Unmethy	-1.77238
cg17369694	6	32593374	HLA-DRB5	NM_002125	3'UTR	NA	RA	Margin	-1.57288	Margin	-1.46156	Margin	-1.4198	Margin	-1.85749	Margin	-1.72117	Margin	-1.57519	Unmethy	-2.04173	Margin	-1.30366	Margin	-0.969304	Margin	-1.46254
cg01341801	6	32597181	HLA-DRB5	NM_002125	Body	N_Shore	RA	Margin	-0.49557	Margin	-0.763484	Margin	-1.16081	Margin	-1.46984	Margin	-1.27111	Margin	-1.33841	Margin	-1.34511	Margin	-0.657941	Methy	1.09078	Margin	-0.501816
cg13972202	6	32597779	HLA-DRB5	NM_002125	Body	Island	RA	Margin	0.718609	Methy	1.00205	Margin	0.859765	Margin	0.747096	Margin	0.873989	Margin	0.647225	Margin	0.651757	Margin	0.683955	Margin	0.679724	Margin	0.6845
cg23365293	6	32597962	HLA-DRB5	NM_002125	Body	Island	RA	Margin	0.754039	Margin	0.644962	Margin	0.490363	Margin	0.505838	Margin	0.767418	Margin	1.04379	Methy	1.04688	Methy	0.863921	Methy	1.19378	Methy	1.0036
cg00579921	6	32597969	HLA-DRB5	NM_002125	Body	Island	RA	Methy	1.23278	Methy	1.15469	Margin	0.920149	Methy	1.10082	Margin	0.785415	Methy	1.39551	Methy	1.50718	Methy	1.07848	Methy	1.40035	Methy	1.22837
cg18424635	6	32598399	HLA-DRB5	NM_002125	Body	S_Shore	RA	Margin	0.448544	Margin	0.352459	Margin	0.44891	Margin	0.201524	Margin	0.272527	Margin	0.426968	Margin	0.432507	Margin	0.544717	Methy	0.961966	Margin	0.716439
cg08265274	6	32598422	HLA-DRB5	NM_002125	Body	S_Shore	RA	Margin	0.536717	Margin	0.555172	Margin	0.494693	Margin	0.301742	Margin	0.665136	Margin	0.276563	Margin	0.492593	Margin	0.667766	Methy	1.25591	Margin	0.442538
cg27362989	6	32600176	HLA-DRB5	NM_002125	Body	S_Shelf	RA	Margin	0.821291	Margin	0.923206	Margin	0.830779	Margin	0.868813	Methy	1.36231	Margin	-0.0797819	Methy	1.00881	Methy	0.809301	Methy	2.31733	Methy	1.19343
cg15011943	6	32601895	HLA-DRB5	NM_002125	Body	S_Shelf	RA	Methy	2.07015	Methy	2.05021	Methy	2.30042	Methy	1.72573	Methy	1.96375	Margin	0.602553	Methy	1.77827	Methy	2.25719	Methy	2.17808	Methy	2.26257
cg19516921	6	32601972	HLA-DRB5	NM_002125	Body	S_Shelf	RA	Methy	0.961858	Margin	0.514523	Margin	0.729916	Margin	0.397732	Margin	0.161607	Margin	-0.381218	Margin	-0.167314	Margin	0.272864	Methy	1.39198	Methy	1.13256
cg16699635	6	32606655	HLA-DRB5	NM_002125	TSS1500	NA	RA	Methy	0.984275	Methy	1.12294	Methy	1.45072	Methy	0.981839	Margin	0.972496	Margin	-0.169799	Margin	0.458224	Methy	0.790433	Margin	0.596405	Margin	0.527312
cg07984380	6	32654997	HLA-DRB1	NM_002124	Body	NA	Asthma,IBD,RA,SLE	Margin	-1.73606	Margin	-0.776366	Margin	-0.27453	Margin	-0.287196	Margin	-0.403453	Margin	-1.22061	Unmethy	-2.53091	Unmethy	-2.83542	Unmethy	-2.78134	Unmethy	-2.37211
cg26590106	6	32656299	HLA-DRB1	NM_002124	Body	N_Shelf	Asthma,IBD,RA,SLE	Methy	1.21763	Methy	1.34942	Margin	0.592693	Methy	1.45824	Margin	0.909954	Margin	1.10309	Methy	0.696483	Methy	0.876255	Methy	1.91239	Methy	1.05257
cg04026937	6	32657339	HLA-DRB1	NM_002124	Body	N_Shelf	Asthma,IBD,RA,SLE	Methy	1.53783	Methy	1.58728	Methy	1.45149	Methy	1.32796	Methy	1.43128	Margin	0.478902	Methy	1.27826	Methy	1.4629	Methy	1.46725	Methy	1.44007
cg20022036	6	32657474	HLA-DRB1	NM_002124	Body	N_Shelf	Asthma,IBD,RA,SLE	Margin	0.793116	Margin	0.986844	Methy	1.12152	Methy	0.921692	Methy	1.01421	Margin	0.558724	Methy	0.752997	Methy	0.709143	Methy	1.14767	Margin	0.781293
cg13910785	6	32657827	HLA-DRB1	NM_002124	Body	N_Shelf	Asthma,IBD,RA,SLE	Margin	0.547965	Methy	1.00992	Margin	0.480433	Margin	0.384942	Methy	1.15743	Margin	0.571677	Margin	0.465875	Margin	0.409552	Methy	1.86637	Methy	1.13422
cg17316649	6	32659994	HLA-DRB1	NM_002124	Body	Island	Asthma,IBD,RA,SLE	Methy	1.11066	Methy	1.19566	Methy	1.31493	Methy	1.2476	Methy	1.47907	Margin	1.08814	Methy	1.1184	Methy	1.16558	Methy	1.14566	Methy	1.05577
cg06032479	6	32660004	HLA-DRB1	NM_002124	Body	Island	Asthma,IBD,RA,SLE	Margin	0.593926	Margin	0.67963	Margin	0.606239	Margin	0.640579	Margin	0.684993	Margin	0.633452	Methy	0.678765	Margin	0.68157	Methy	0.945495	Margin	0.644277
cg08578320	6	32660017	HLA-DRB1	NM_002124	Body	Island	Asthma,IBD,RA,SLE	Methy	0.974487	Methy	1.22049	Margin	0.957396	Margin	0.55826	Margin	0.947762	Margin	0.671936	Margin	0.593911	Methy	1.04701	Margin	0.562615	Margin	0.792553
cg09139047	6	32660020	HLA-DRB1	NM_002124	Body	Island	Asthma,IBD,RA,SLE	Methy	1.34196	Methy	1.45687	Methy	1.1841	Methy	1.40575	Methy	1.69521	Margin	1.00616	Methy	1.37887	Methy	1.60265	Margin	0.347473	Methy	1.38802
cg15982117	6	32660084	HLA-DRB1	NM_002124	Body	Island	Asthma,IBD,RA,SLE	Margin	0.795151	Methy	1.02503	Methy	1.10106	Margin	0.794169	Margin	0.978611	Margin	0.364994	Methy	0.69288	Methy	0.949474	Margin	0.292167	Margin	0.674002
cg16514085	6	32660130	HLA-DRB1	NM_002124	Body	Island	Asthma,IBD,RA,SLE	Unmethy	-2.13146	Margin	-1.39492	Margin	-1.37577	Margin	-1.60125	Margin	-1.19153	Margin	-1.17308	Margin	-1.31565	Margin	-1.2962	Unmethy	-3.39289	Unmethy	-2.54134
cg14645244	6	32660183	HLA-DRB1	NM_002124	Body	Island	Asthma,IBD,RA,SLE	Margin	-1.81781	Margin	-1.57132	Unmethy	-1.84617	Margin	-1.93115	Unmethy	-1.99595	Margin	-1.65035	Margin	-1.85622	Margin	-1.88438	Unmethy	-3.62927	Unmethy	-2.86255
cg10632894	6	32660431	HLA-DRB1	NM_002124	Body	S_Shore	Asthma,IBD,RA,SLE	Margin	0.2047	Margin	0.716764	Margin	0.881148	Methy	0.941657	Margin	0.464652	Margin	-0.323306	Margin	0.373696	Margin	0.345211	Methy	1.35497	Methy	1.04202
cg14075454	6	32660493	HLA-DRB1	NM_002124	Body	S_Shore	Asthma,IBD,RA,SLE	Methy	1.19371	Margin	0.91876	Methy	1.4417	Methy	1.35107	Methy	1.6297	Methy	1.48916	Methy	1.2213	Margin	0.623868	Methy	1.16064	Methy	1.6275
cg17480035	6	32660648	HLA-DRB1	NM_002124	Body	S_Shore	Asthma,IBD,RA,SLE	Methy	1.07803	Methy	1.17916	Methy	1.98934	Margin	0.27524	Margin	0.473751	Margin	-1.09858	Margin	0.500996	Methy	1.11224	Margin	0.454562	Margin	0.731814
cg05383619	6	32661898	HLA-DRB1	NM_002124	Body	S_Shore	Asthma,IBD,RA,SLE	Methy	1.15354	Methy	1.47119	Methy	1.73761	Margin	0.649597	Methy	1.10098	Margin	-1.62846	Margin	0.47364	Methy	1.63904	Methy	2.58349	Methy	2.42118
cg17416722	6	32662363	HLA-DRB1	NM_002124	Body	S_Shelf	Asthma,IBD,RA,SLE	Unmethy	-1.93313	Unmethy	-2.17924	Unmethy	-2.13811	Unmethy	-2.35254	Unmethy	-2.36307	Unmethy	-3.13025	Unmethy	-2.09976	Unmethy	-2.15931	Margin	-1.0987	Unmethy	-2.00915
cg00598125	6	32663389	HLA-DRB1	NM_002124	Body	S_Shelf	Asthma,IBD,RA,SLE	Margin	-0.223656	Margin	-0.0647495	Margin	0.422595	Margin	-0.142839	Margin	-0.362479	Unmethy	-2.08711	Margin	-0.736852	Margin	-0.511863	Margin	-0.445425	Margin	-0.687742
cg24180805	6	32664071	HLA-DRB1	NM_002124	Body	S_Shelf	Asthma,IBD,RA,SLE	Margin	0.786015	Margin	0.756733	Methy	1.25425	Margin	0.494703	Margin	0.72894	Margin	-0.585189	Margin	0.317599	Margin	0.57451	Methy	0.961214	Methy	1.0194
cg08231637	6	32664453	HLA-DRB1	NM_002124	Body	NA	Asthma,IBD,RA,SLE	Methy	1.22719	Margin	0.785629	Methy	2.03492	Margin	0.672385	Margin	0.250888	Unmethy	-2.01164	Margin	-0.306429	Methy	1.14719	Methy	1.49275	Methy	1.07957
cg11993350	6	32665382	HLA-DRB1	NM_002124	Body	NA	Asthma,IBD,RA,SLE	Unmethy	-2.78344	Unmethy	-1.84033	Margin	0.0519444	Margin	-1.60972	Unmethy	-2.62811	Unmethy	-2.94059	Unmethy	-3.05632	Unmethy	-2.99596	Unmethy	-2.15891	Unmethy	-2.80829
cg24760581	6	32665948	HLA-DRB1	NM_002124	TSS1500	NA	Asthma,IBD,RA,SLE	Methy	2.16989	Methy	1.84396	Methy	2.5029	Methy	1.81411	Methy	1.94555	Margin	0.19306	Methy	0.76638	Methy	1.58802	Methy	1.24886	Methy	2.16417
cg14310877	6	32682177	NA	NA	NA	NA	Asthma,IBD,RA,SLE	Margin	0.389448	Methy	1.05255	Methy	2.05711	Methy	2.09457	Methy	1.37078	Margin	1.07216	Margin	-0.543507	Margin	-0.321458	Margin	-0.163441	Margin	-0.127221
cg07007382	6	32686048	NA	NA	NA	NA	Asthma,IBD,RA,SLE	Margin	-0.815915	Margin	-1.16666	Margin	-1.17585	Margin	-1.36291	Margin	-1.66883	Unmethy	-3.93318	Margin	-0.761729	Margin	-0.666424	Margin	-0.74388	Margin	-0.765029
cg21692241	6	32712542	HLA-DQA1	NM_002122	TSS1500	NA	Asthma,T1D,IBD,RA,SLE	Methy	2.07231	Methy	1.94802	Methy	2.33001	Methy	1.82443	Methy	1.88691	Margin	0.357851	Methy	1.86389	Methy	2.0561	Methy	2.1872	Methy	1.98777
cg24143305	6	32712843	HLA-DQA1	NM_002122	TSS1500	NA	Asthma,T1D,IBD,RA,SLE	Methy	1.66441	Methy	1.82185	Methy	1.72823	Methy	1.30362	Methy	1.83293	Margin	0.526136	Methy	1.30211	Methy	1.49582	Methy	1.73574	Methy	1.81548
cg00978846	6	32713021	HLA-DQA1	NM_002122	TSS200	NA	Asthma,T1D,IBD,RA,SLE	Margin	-1.09239	Margin	-0.550004	Margin	0.29233	Margin	-0.587189	Margin	-1.19851	Unmethy	-3.37771	Unmethy	-2.03948	Margin	-1.29073	Margin	-1.2379	Margin	-1.46543
cg03787837	6	32713363	HLA-DQA1	NM_002122	Body	NA	Asthma,T1D,IBD,RA,SLE	Margin	0.0626786	Margin	0.997293	Methy	1.64504	Margin	0.653401	Margin	0.716023	Unmethy	-2.63019	Margin	-0.363701	Margin	-0.0914597	Margin	0.0679582	Margin	-0.359715
cg02919082	6	32713672	HLA-DQA1	NM_002122	Body	NA	Asthma,T1D,IBD,RA,SLE	Margin	0.09704	Margin	0.675458	Methy	1.16898	Margin	0.75695	Methy	1.17204	Margin	-0.88384	Margin	0.439782	Margin	0.310538	Margin	0.892883	Margin	0.692963
cg22933800	6	32713682	HLA-DQA1	NM_002122	Body	NA	Asthma,T1D,IBD,RA,SLE	Margin	0.583338	Margin	0.705799	Methy	1.25027	Methy	1.04209	Margin	0.811181	Margin	-1.38052	Margin	0.423932	Methy	0.870756	Methy	0.986899	Margin	0.835061
cg01541565	6	32714363	HLA-DQA1	NM_002122	Body	NA	Asthma,T1D,IBD,RA,SLE	Methy	1.18212	Methy	1.11653	Methy	1.26754	Margin	0.664235	Methy	1.00098	Margin	-0.273044	Methy	1.00251	Methy	1.08969	Methy	1.19083	Methy	1.26557
cg04054303	6	32714423	HLA-DQA1	NM_002122	Body	NA	Asthma,T1D,IBD,RA,SLE	Margin	0.76586	Margin	0.950348	Methy	2.28141	Methy	1.86499	Methy	1.4463	Margin	-0.594539	Margin	0.387335	Margin	0.454862	Methy	2.31501	Methy	1.43445
cg05370853	6	32714612	HLA-DQA1	NM_002122	Body	NA	Asthma,T1D,IBD,RA,SLE	Margin	0.477177	Margin	0.867961	Methy	2.55798	Methy	1.86916	Methy	1.55214	Unmethy	-2.80499	Margin	-0.509938	Margin	-0.164245	Margin	-0.158941	Margin	-0.242795
cg24969496	6	32714823	HLA-DQA1	NM_002122	Body	NA	Asthma,T1D,IBD,RA,SLE	Margin	-0.123308	Margin	0.731499	Methy	2.01536	Methy	1.56264	Methy	1.57703	Unmethy	-2.99918	Margin	-1.67229	Margin	-1.26992	Margin	-1.43517	Margin	-1.26933
cg02793323	6	32714862	HLA-DQA1	NM_002122	Body	NA	Asthma,T1D,IBD,RA,SLE	Margin	-0.81934	Margin	-0.267398	Margin	-0.203808	Margin	-0.561086	Margin	-0.520249	Unmethy	-2.80846	Margin	-0.992719	Margin	-1.01762	Margin	-1.25487	Margin	-0.845157
cg10217052	6	32715152	HLA-DQA1	NM_002122	Body	NA	Asthma,T1D,IBD,RA,SLE	Methy	2.51188	Methy	2.59349	Methy	2.88283	Methy	2.53802	Methy	2.66697	Margin	-0.359317	Methy	2.80962	Methy	2.52524	Methy	3.06552	Methy	2.91132
cg09411910	6	32715202	HLA-DQA1	NM_002122	Body	NA	Asthma,T1D,IBD,RA,SLE	Methy	2.65514	Methy	1.42626	Methy	2.10659	Methy	1.17256	Methy	1.676	Margin	-1.60901	Methy	1.45125	Methy	1.81818	Methy	2.0529	Methy	2.561
cg16431720	6	32715487	HLA-DQA1	NM_002122	Body	NA	Asthma,T1D,IBD,RA,SLE	Methy	2.52576	Methy	2.63	Methy	2.88762	Methy	2.70499	Methy	2.61585	Margin	-0.485383	Methy	3.35801	Methy	2.87299	Methy	2.63384	Methy	3.04935
cg14799809	6	32716073	HLA-DQA1	NM_002122	Body	NA	Asthma,T1D,IBD,RA,SLE	Methy	3.32032	Methy	3.33301	Methy	3.22082	Methy	3.03882	Methy	3.5622	Margin	0.988693	Methy	3.50517	Methy	3.37699	Methy	3.25967	Methy	3.53557
cg13778567	6	32717761	HLA-DQA1	NM_002122	Body	NA	Asthma,T1D,IBD,RA,SLE	Margin	-0.184708	Margin	0.0651834	Margin	0.79517	Margin	-0.332035	Unmethy	-2.32418	Margin	0.469116	Margin	-0.163011	Margin	-0.415395	Margin	-0.0286142	Margin	0.770077
cg09052185	6	32718713	HLA-DQA1	NM_002122	3'UTR	NA	Asthma,T1D,IBD,RA,SLE	Margin	0.129527	Methy	1.35533	Methy	2.24713	Methy	2.57394	Methy	3.04697	Methy	2.1948	Margin	-0.701123	Margin	-1.29148	Margin	-0.546516	Margin	0.0407861
cg10222549	6	32718772	HLA-DQA1	NM_002122	3'UTR	NA	Asthma,T1D,IBD,RA,SLE	Methy	1.50999	Methy	2.41729	Methy	3.06561	Methy	3.28388	Methy	3.10904	Methy	2.94019	Methy	0.876818	Methy	0.91587	Margin	0.820397	Methy	1.53112
cg23214071	6	32735762	HLA-DQB1	NM_002123	3'UTR	NA	Asthma,RA,T1D,SLE,IBD	Methy	1.70395	Methy	1.48493	Methy	1.97713	Methy	1.83542	Methy	1.38713	Unmethy	-2.39713	Methy	1.41839	Methy	2.44344	Methy	1.93363	Methy	2.2999
cg19301366	6	32735823	HLA-DQB1	NM_002123	3'UTR	NA	Asthma,RA,T1D,SLE,IBD	Methy	2.1223	Methy	1.82511	Methy	2.50139	Methy	2.40995	Methy	1.99322	Unmethy	-2.04582	Methy	2.15927	Methy	2.05764	Methy	2.32592	Methy	2.25639
cg00995368	6	32735863	HLA-DQB1	NM_002123	3'UTR	NA	Asthma,RA,T1D,SLE,IBD	Methy	2.11145	Methy	1.87179	Methy	2.47046	Methy	2.28688	Methy	1.30013	Unmethy	-2.54076	Methy	2.52186	Methy	2.45109	Methy	2.70626	Methy	2.74627
cg14323910	6	32736283	HLA-DQB1	NM_002123	Body	N_Shelf	Asthma,RA,T1D,SLE,IBD	Methy	3.26931	Methy	2.81886	Methy	2.58729	Methy	3.025	Methy	3.19079	Margin	1.11069	Methy	3.07429	Methy	3.31294	Methy	3.11259	Methy	3.0488
cg10989981	6	32737898	HLA-DQB1	NM_002123	Body	N_Shelf	Asthma,RA,T1D,SLE,IBD	Methy	1.00966	Margin	0.965161	Methy	1.11606	Margin	0.907549	Methy	1.13772	Margin	1.05244	Methy	0.979987	Methy	0.921462	Methy	1.01271	Methy	1.01404
cg09312897	6	32739978	HLA-DQB1	NM_002123	Body	N_Shore	Asthma,RA,T1D,SLE,IBD	Methy	2.87751	Methy	3.0562	Methy	3.68624	Methy	2.8255	Methy	3.4914	Margin	0.649598	Methy	1.99178	Methy	3.32987	Methy	3.37652	Methy	3.44129
cg18902440	6	32740014	HLA-DQB1	NM_002123	Body	N_Shore	Asthma,RA,T1D,SLE,IBD	Methy	1.4395	Methy	2.01933	Methy	3.00984	Methy	3.04446	Methy	2.91319	Margin	0.770383	Margin	-0.675763	Margin	0.635122	Methy	0.993719	Methy	1.3757
cg21543081	6	32740084	HLA-DQB1	NM_002123	Body	N_Shore	Asthma,RA,T1D,SLE,IBD	Margin	0.386844	Margin	0.983365	Methy	1.56073	Methy	1.33988	Methy	1.48799	Margin	0.395156	Margin	0.210357	Margin	0.227284	Margin	0.449683	Margin	0.471986
cg12192813	6	32740086	HLA-DQB1	NM_002123	Body	N_Shore	Asthma,RA,T1D,SLE,IBD	Margin	0.205925	Margin	0.714549	Methy	1.4729	Methy	1.24046	Methy	1.13939	Margin	0.0885493	Margin	-0.149797	Margin	-0.0632904	Margin	-0.00883348	Margin	0.256347
cg26159068	6	32740137	HLA-DQB1	NM_002123	Body	Island	Asthma,RA,T1D,SLE,IBD	Margin	0.856171	Methy	1.09122	Methy	1.57594	Methy	1.52229	Methy	1.43721	Margin	0.584026	Margin	0.557992	Methy	0.768421	Methy	1.03541	Methy	1.06048
cg01745539	6	32740309	HLA-DQB1	NM_002123	Body	Island	Asthma,RA,T1D,SLE,IBD	Margin	-0.488522	Margin	-0.363971	Margin	0.47421	Margin	-0.227532	Margin	-0.282809	Unmethy	-3.01133	Margin	-0.551344	Margin	-0.574076	Margin	-1.1066	Margin	-0.499765
cg10180404	6	32740312	HLA-DQB1	NM_002123	Body	Island	Asthma,RA,T1D,SLE,IBD	Margin	0.0339312	Margin	0.345735	Margin	0.917101	Margin	0.100908	Margin	0.062311	Unmethy	-2.10662	Margin	-0.322333	Margin	-0.155378	Margin	-0.27643	Margin	-0.14285
cg21493951	6	32740316	HLA-DQB1	NM_002123	Body	Island	Asthma,RA,T1D,SLE,IBD	Margin	0.062623	Margin	0.189879	Margin	0.847028	Margin	-0.00286377	Margin	-0.178169	Unmethy	-2.10867	Margin	-0.514756	Margin	-0.0323733	Margin	-0.30345	Margin	-0.118565
cg22984282	6	32740546	HLA-DQB1	NM_002123	Body	Island	Asthma,RA,T1D,SLE,IBD	Unmethy	-2.00628	Unmethy	-2.21711	Unmethy	-1.82747	Margin	-1.87909	Unmethy	-2.05815	Unmethy	-2.21773	Unmethy	-2.07052	Unmethy	-2.09974	Unmethy	-1.94119	Unmethy	-1.87287
cg16345566	6	32741080	HLA-DQB1	NM_002123	Body	S_Shore	Asthma,RA,T1D,SLE,IBD	Unmethy	-2.75761	Unmethy	-2.15369	Margin	-1.58611	Margin	-2.0523	Unmethy	-2.42054	Unmethy	-3.86659	Unmethy	-3.45082	Unmethy	-3.03938	Unmethy	-2.72581	Unmethy	-3.19043
cg24593918	6	32741135	HLA-DQB1	NM_002123	Body	S_Shore	Asthma,RA,T1D,SLE,IBD	Margin	-1.53116	Margin	-1.41114	Margin	-0.940961	Margin	-1.5433	Margin	-1.61968	Unmethy	-2.83523	Unmethy	-1.91921	Margin	-1.79735	Unmethy	-1.67159	Unmethy	-1.77766
cg23464743	6	32741141	HLA-DQB1	NM_002123	Body	S_Shore	Asthma,RA,T1D,SLE,IBD	Margin	-1.72543	Margin	-1.34473	Margin	-0.923146	Margin	-1.48904	Margin	-1.41346	Unmethy	-2.79627	Unmethy	-2.11894	Unmethy	-2.02032	Unmethy	-1.50704	Unmethy	-2.00348
cg05724777	6	32742340	HLA-DQB1	NM_002123	1stExon	S_Shore	Asthma,RA,T1D,SLE,IBD	Unmethy	-2.53192	Unmethy	-2.58638	Unmethy	-2.39218	Unmethy	-2.56881	Unmethy	-2.59668	Unmethy	-2.73306	Margin	-1.6456	Unmethy	-1.97097	Unmethy	-2.41017	Unmethy	-2.17445
cg01889448	6	32743849	HLA-DQB1	NM_002123	TSS1500	S_Shelf	Asthma,RA,T1D,SLE,IBD	Methy	2.80919	Methy	2.93884	Methy	3.37853	Methy	2.93697	Methy	2.92164	Methy	1.38823	Methy	2.53641	Methy	2.48914	Methy	2.279	Margin	0.835785
cg01018117	6	32815434	NA	NA	NA	NA	Asthma,RA,T1D,SLE,IBD	Margin	0.801024	Margin	0.807959	Margin	0.577081	Margin	0.35706	Margin	0.486141	Margin	0.769573	Methy	0.935296	Methy	0.837195	Methy	1.08452	Methy	1.03249
cg20821042	6	32817136	HLA-DQA2	NM_020056	TSS200	NA	Asthma,RA,T1D,SLE	Methy	1.78432	Methy	1.51302	Methy	1.28018	Margin	0.60297	Margin	0.84404	Methy	1.44898	Methy	2.29077	Methy	1.96577	Methy	2.07668	Methy	2.08689
cg18785140	6	32820023	HLA-DQA2	NM_020056	Body	NA	Asthma,RA,T1D,SLE	Methy	1.21814	Methy	1.72226	Methy	1.88398	Methy	1.65237	Methy	1.44176	Methy	1.79089	Methy	1.44404	Methy	1.11874	Methy	1.30573	Margin	0.793208
cg14740554	6	32821585	HLA-DQA2	NM_020056	Body	NA	Asthma,RA,T1D,SLE	Margin	-0.0693989	Margin	0.144233	Margin	0.406924	Margin	-0.725043	Unmethy	-2.25749	Margin	0.760359	Margin	0.162371	Margin	-0.115213	Margin	0.0710477	Margin	0.509335
cg22812614	6	32821805	HLA-DQA2	NM_020056	Body	NA	Asthma,RA,T1D,SLE	Margin	0.692464	Margin	0.514303	Margin	0.26139	Margin	-0.0368363	Margin	-0.0813178	Margin	0.886367	Methy	1.08419	Methy	1.07711	Methy	1.13791	Methy	1.08006
cg17776207	6	32822044	HLA-DQA2	NM_020056	Body	NA	Asthma,RA,T1D,SLE	Methy	1.57443	Methy	1.23955	Margin	0.690758	Margin	0.454515	Methy	1.0173	Methy	1.266	Methy	2.09322	Methy	2.00553	Methy	1.97381	Methy	2.24749
cg04090745	6	32832347	HLA-DQB2	NR_003937	Body	NA	SLE	Methy	2.07401	Methy	1.45207	Margin	0.927788	Margin	0.296432	Margin	0.322691	Methy	1.96881	Methy	2.39308	Methy	2.3687	Methy	2.62048	Methy	2.56012
cg08976995	6	32833053	HLA-DQB2	NR_003937	Body	NA	SLE	Methy	1.89933	Methy	1.70716	Methy	1.61453	Margin	0.914603	Methy	1.02186	Methy	1.77448	Methy	1.88013	Methy	1.90135	Methy	2.03085	Methy	1.97718
cg17360552	6	32833310	HLA-DQB2	NR_003937	Body	NA	SLE	Margin	0.86153	Margin	0.916048	Margin	0.796423	Margin	0.696204	Margin	0.785384	Margin	0.740272	Methy	0.68116	Methy	0.770428	Margin	0.759896	Margin	0.769689
cg05764570	6	32834670	HLA-DQB2	NR_003937	Body	N_Shelf	SLE	Methy	1.3332	Methy	1.30451	Methy	1.20486	Margin	0.711949	Margin	0.777235	Methy	1.26183	Methy	1.48408	Methy	1.4623	Methy	1.2708	Methy	1.45103
cg26228476	6	32836929	HLA-DQB2	NR_003937	Body	N_Shore	SLE	Margin	0.87092	Methy	1.27171	Methy	1.71674	Methy	1.51585	Methy	1.62504	Margin	0.959593	Margin	0.654836	Methy	0.734163	Methy	0.991707	Methy	1.05214
cg25049941	6	32836931	HLA-DQB2	NR_003937	Body	N_Shore	SLE	Margin	0.670697	Methy	1.02069	Methy	1.45734	Methy	1.41007	Methy	1.38514	Margin	0.476549	Margin	0.415839	Margin	0.472888	Margin	0.570832	Margin	0.655978
cg03926206	6	32837336	HLA-DQB2	NR_003937	Body	Island	SLE	Margin	0.647103	Margin	0.74479	Margin	0.878556	Methy	0.948111	Margin	0.892184	Margin	0.999609	Methy	0.698526	Methy	0.794494	Margin	0.803653	Margin	0.73124
cg02964065	6	32837523	HLA-DQB2	NR_003937	Body	Island	SLE	Margin	0.626663	Methy	1.00408	Margin	0.966128	Methy	1.12319	Methy	1.1546	Methy	1.41605	Margin	0.503631	Margin	0.641761	Margin	0.534092	Margin	0.656897
cg15255946	6	32837541	HLA-DQB2	NR_003937	Body	Island	SLE	Margin	0.910771	Methy	1.47642	Methy	1.88467	Methy	1.88662	Methy	1.46322	Methy	2.04067	Margin	0.627044	Methy	0.769925	Margin	0.629732	Margin	0.714774
cg27160348	6	32837568	HLA-DQB2	NR_003937	Body	Island	SLE	Methy	1.11363	Methy	1.31732	Methy	1.16864	Methy	1.20807	Methy	1.22629	Methy	1.33934	Margin	0.579036	Methy	0.899205	Margin	0.542466	Margin	0.74681
cg17475271	6	32837719	HLA-DQB2	NR_003937	Body	Island	SLE	Margin	0.764641	Margin	0.876207	Margin	0.690602	Margin	0.353266	Margin	0.631917	Margin	0.948617	Methy	0.912163	Methy	0.874462	Margin	0.859297	Methy	1.10104
cg23831898	6	32838108	HLA-DQB2	NR_003937	Body	S_Shore	SLE	Methy	2.86122	Methy	1.9552	Methy	1.75327	Margin	0.874625	Methy	1.33839	Methy	2.34655	Methy	3.40186	Methy	3.31464	Methy	3.59398	Methy	3.66443
cg11391305	6	32839416	HLA-DQB2	NR_003937	TSS200	S_Shore	SLE	Margin	-1.65606	Margin	-1.46431	Unmethy	-1.81672	Margin	-2.0381	Unmethy	-2.20626	Unmethy	-2.07655	Margin	-1.24823	Margin	-1.37899	Unmethy	-1.52748	Margin	-1.22613
cg08491668	6	33043214	BRD2	NM_005104	TSS1500	N_Shore	Asthma	Margin	-1.58751	Unmethy	-2.10425	Unmethy	-3.10802	Unmethy	-3.9821	Unmethy	-2.9535	Unmethy	-1.86856	Margin	-1.52975	Margin	-1.48846	Unmethy	-1.55682	Unmethy	-2.31581
cg16862821	6	33046447	BRD2;BRD2	NM_001113182;NM_005104	TSS1500;5'UTR	N_Shore	Asthma	Margin	-1.81438	Margin	-1.72465	Unmethy	-1.72315	Margin	-1.93453	Margin	-1.79021	Unmethy	-1.81127	Margin	-1.73007	Margin	-1.7234	Unmethy	-1.67292	Unmethy	-1.814
cg11439393	6	33050041	BRD2;BRD2	NM_001113182;NM_005104	Body;Body	S_Shore	Asthma	Unmethy	-1.9302	Unmethy	-2.03656	Unmethy	-2.30077	Unmethy	-2.79286	Unmethy	-2.64783	Unmethy	-2.00465	Margin	-1.3538	Margin	-1.57842	Margin	-1.38599	Unmethy	-1.61404
cg16416715	6	33050336	BRD2;BRD2	NM_001113182;NM_005104	Body;Body	S_Shore	Asthma	Margin	-1.64684	Unmethy	-2.05246	Unmethy	-3.04315	Unmethy	-3.7017	Unmethy	-3.06325	Margin	-1.72591	Margin	-1.4025	Margin	-1.60777	Unmethy	-1.61378	Unmethy	-1.69668
cg26264318	6	33050378	BRD2;BRD2	NM_001113182;NM_005104	Body;Body	S_Shore	Asthma	Margin	-1.81272	Unmethy	-2.16372	Unmethy	-2.55138	Unmethy	-3.17845	Unmethy	-2.79418	Unmethy	-2.05445	Margin	-1.74578	Margin	-1.74885	Unmethy	-1.85391	Unmethy	-1.97062
cg26953232	6	33050472	BRD2;BRD2	NM_001113182;NM_005104	Body;Body	S_Shore	Asthma	Margin	-0.459308	Margin	-0.85337	Unmethy	-1.98193	Unmethy	-2.93446	Unmethy	-2.16304	Margin	-0.665955	Margin	-0.0991485	Margin	-0.234954	Margin	-0.402957	Margin	-0.501188
cg24275356	6	33050519	BRD2;BRD2	NM_001113182;NM_005104	Body;Body	S_Shore	Asthma	Margin	-1.61454	Unmethy	-1.84071	Unmethy	-2.65406	Unmethy	-3.77796	Unmethy	-2.89375	Margin	-1.44381	Margin	-1.20453	Margin	-1.2425	Margin	-1.37157	Unmethy	-1.55789
cg27395200	6	33050688	BRD2;BRD2	NM_001113182;NM_005104	Body;Body	S_Shore	Asthma	Margin	0.638698	Margin	0.230516	Margin	-0.604536	Margin	-1.211	Margin	-0.86492	Margin	0.80632	Methy	1.27532	Methy	0.937152	Margin	0.821154	Margin	0.582352
cg07275218	6	33050692	BRD2;BRD2	NM_001113182;NM_005104	Body;Body	S_Shore	Asthma	Margin	0.729804	Margin	0.253443	Margin	-0.353855	Margin	-0.790749	Margin	-0.672182	Margin	0.578444	Methy	1.28225	Methy	1.11615	Methy	1.06979	Methy	0.955266
cg17451586	6	33050786	BRD2;BRD2	NM_001113182;NM_005104	Body;Body	S_Shore	Asthma	Margin	-1.88344	Unmethy	-2.16249	Unmethy	-2.78999	Unmethy	-3.48614	Unmethy	-3.06637	Unmethy	-1.82276	Margin	-1.46008	Margin	-1.65861	Unmethy	-1.61785	Unmethy	-1.82397
cg02471378	6	33051003	BRD2;BRD2	NM_001113182;NM_005104	Body;Body	S_Shelf	Asthma	Margin	0.722268	Margin	0.209361	Margin	-0.935311	Margin	-1.93808	Margin	-0.886922	Margin	1.03025	Methy	1.58063	Methy	1.00861	Methy	1.21319	Methy	1.06546
cg15025485	6	33051817	BRD2;BRD2	NM_001113182;NM_005104	Body;Body	S_Shelf	Asthma	Methy	1.71347	Methy	1.48194	Methy	1.44468	Margin	0.880689	Margin	0.774142	Methy	1.51079	Methy	2.00786	Methy	1.88907	Methy	1.96482	Methy	1.62506
cg26450574	6	33052045	BRD2;BRD2	NM_001113182;NM_005104	Body;Body	S_Shelf	Asthma	Methy	1.73205	Methy	1.53956	Methy	1.25684	Margin	0.57426	Margin	0.527443	Methy	1.88572	Methy	2.5011	Methy	2.10997	Methy	2.12985	Methy	1.76891
cg26246342	6	33053401	BRD2;BRD2	NM_001113182;NM_005104	Body;Body	NA	Asthma	Margin	0.810343	Margin	0.706891	Margin	0.791509	Margin	0.232915	Margin	-0.0199454	Margin	0.738502	Methy	1.13886	Methy	0.839688	Margin	0.891238	Margin	0.611826
cg01935221	6	33053609	BRD2;BRD2	NM_001113182;NM_005104	Body;Body	NA	Asthma	Margin	0.748826	Methy	1.05784	Margin	0.925864	Margin	0.520031	Margin	0.586022	Methy	1.23399	Methy	1.25205	Methy	0.776701	Margin	0.81535	Margin	0.592959
cg18888137	6	33053737	BRD2;BRD2	NM_001113182;NM_005104	Body;Body	NA	Asthma	Margin	-0.32563	Margin	0.976594	Methy	1.95299	Methy	2.65765	Methy	2.26243	Methy	2.49327	Margin	-1.34486	Unmethy	-2.33576	Unmethy	-2.9616	Unmethy	-3.20682
cg02707277	6	33053884	BRD2;BRD2	NM_001113182;NM_005104	Body;Body	NA	Asthma	Methy	1.91892	Methy	2.1977	Methy	2.20239	Methy	1.98084	Methy	1.78788	Methy	2.4094	Methy	2.11775	Methy	2.06331	Methy	1.64108	Margin	0.784557
cg01716683	6	33055891	BRD2;BRD2	NM_001113182;NM_005104	Body;Body	NA	Asthma	Methy	1.26401	Methy	2.05719	Methy	2.2891	Methy	2.28162	Methy	1.94599	Methy	2.5733	Methy	1.81982	Methy	0.736446	Methy	0.928666	Margin	0.791939
cg10995964	6	33056439	BRD2;BRD2	NM_001113182;NM_005104	Body;Body	NA	Asthma	Methy	1.19477	Methy	1.84617	Methy	2.5091	Methy	2.53208	Methy	1.88172	Methy	2.03238	Methy	0.758184	Methy	0.818671	Margin	0.700549	Margin	0.62851
cg15279832	6	33060221	NA	NA	NA	NA	Asthma	Methy	1.58714	Methy	2.17525	Methy	2.40319	Methy	2.28049	Methy	2.34411	Methy	2.0117	Methy	1.81236	Methy	0.912963	Margin	0.439944	Unmethy	-1.89516
cg16284213	6	33060546	NA	NA	NA	NA	Asthma	Margin	-1.42027	Margin	-1.39409	Margin	-1.4337	Margin	-0.995171	Margin	-0.900183	Margin	-1.77902	Margin	-1.75279	Margin	-1.5371	Unmethy	-1.53208	Unmethy	-1.75914
cg00540941	6	33082821	HLA-DOA	NM_002119	Body	N_Shore	Asthma	Methy	1.25557	Methy	1.05311	Margin	0.438865	Margin	0.460967	Methy	1.15232	Methy	1.64479	Methy	1.6517	Methy	1.36798	Margin	0.879333	Methy	1.4103
cg18477188	6	33083863	HLA-DOA	NM_002119	Body	Island	Asthma	Methy	6.11292	Margin	5.90449	Margin	6.0279	Unmethy	6.29946	Unmethy	5.97441	Methy	5.711	Methy	5.88758	Methy	5.91218	Methy	5.88304	Methy	5.7758
cg25061610	6	33084027	HLA-DOA	NM_002119	Body	S_Shore	Asthma	Methy	1.0281	Methy	1.10569	Margin	0.944768	Methy	0.96122	Margin	0.724815	Margin	0.615204	Methy	1.45646	Methy	1.14399	Methy	1.17135	Methy	1.16694
cg13336690	6	33084462	HLA-DOA	NM_002119	Body	S_Shore	Asthma	Methy	1.70903	Methy	1.72031	Methy	1.96417	Methy	1.85126	Methy	1.89683	Margin	-0.372678	Methy	1.94646	Methy	1.63329	Methy	1.7371	Methy	1.74832
cg23220637	6	33084783	HLA-DOA	NM_002119	Body	S_Shore	Asthma	Margin	0.815013	Methy	1.17588	Methy	2.01808	Methy	1.60171	Methy	1.49319	Margin	-0.631765	Methy	0.738237	Methy	0.692979	Margin	0.84125	Margin	0.848859
cg03780648	6	33084804	HLA-DOA	NM_002119	Body	S_Shore	Asthma	Margin	0.904971	Methy	1.16062	Methy	1.49337	Methy	0.936346	Methy	0.982291	Margin	-0.562906	Methy	0.938485	Methy	0.880411	Methy	0.990207	Methy	0.949466
cg15630950	6	33084875	HLA-DOA	NM_002119	Body	S_Shore	Asthma	Margin	0.19255	Margin	0.321786	Methy	1.24295	Margin	0.237036	Margin	0.516316	Margin	-1.37698	Margin	-0.216496	Margin	-0.0396608	Margin	-0.0828674	Margin	0.000224893
cg22037249	6	33145668	HLA-DPA1	NM_033554	Body	NA	Asthma	Methy	1.88394	Methy	2.1592	Methy	2.12789	Methy	2.31097	Methy	2.16595	Margin	0.782228	Methy	1.26169	Methy	1.66956	Methy	1.43651	Methy	1.61187
cg01140143	6	33147374	HLA-DPA1	NM_033554	Body	NA	Asthma	Margin	0.658611	Margin	1.0002	Methy	2.2074	Methy	1.00766	Margin	0.289027	Margin	-1.20657	Margin	-0.3908	Margin	0.164522	Margin	0.216484	Margin	0.0542414
cg02904996	6	33147390	HLA-DPA1	NM_033554	Body	NA	Asthma	Margin	0.109984	Margin	0.39819	Methy	1.49985	Margin	0.856515	Margin	-0.238468	Unmethy	-2.67548	Margin	-1.1171	Margin	-0.445281	Margin	-0.379262	Margin	-0.628909
cg10921592	6	33147392	HLA-DPA1	NM_033554	Body	NA	Asthma	Margin	0.523639	Margin	0.84112	Methy	2.48492	Methy	1.26248	Margin	0.268404	Unmethy	-2.53633	Margin	-0.65242	Margin	0.10986	Margin	0.0963187	Margin	0.0304446
cg05366160	6	33147459	HLA-DPA1	NM_033554	Body	NA	Asthma	Margin	-0.721979	Margin	0.0256044	Methy	1.54936	Margin	0.4606	Margin	-0.699342	Unmethy	-3.24212	Margin	-1.79044	Margin	-1.04881	Margin	-1.14652	Margin	-1.34339
cg03009030	6	33147478	HLA-DPA1	NM_033554	Body	NA	Asthma	Margin	-1.16892	Margin	-0.368634	Margin	0.829838	Margin	0.0663732	Margin	-1.20877	Unmethy	-3.53431	Unmethy	-2.52224	Unmethy	-2.14084	Unmethy	-2.19479	Unmethy	-2.29097
cg23331433	6	33147584	HLA-DPA1	NM_033554	Body	NA	Asthma	Margin	-1.0065	Margin	-0.540553	Margin	0.532313	Margin	-0.439473	Margin	-1.08779	Unmethy	-3.09593	Unmethy	-2.09198	Margin	-1.69038	Unmethy	-1.55742	Unmethy	-1.60117
cg04049719	6	33147782	HLA-DPA1	NM_033554	Body	NA	Asthma	Margin	0.0204492	Margin	0.145164	Methy	1.4523	Margin	0.606545	Margin	-0.300701	Unmethy	-3.38252	Margin	-1.01119	Margin	-0.186378	Margin	-0.165005	Margin	-0.372926
cg25824217	6	33148513	HLA-DPA1	NM_033554	Body	NA	Asthma	Margin	-0.21883	Margin	0.0680062	Methy	1.55054	Margin	0.222245	Margin	-0.864757	Unmethy	-2.9693	Margin	-1.75963	Margin	-0.856343	Margin	-0.342619	Margin	-0.496416
cg20617328	6	33148588	HLA-DPA1	NM_033554	Body	NA	Asthma	Margin	-1.15385	Margin	-0.761819	Margin	-0.185952	Margin	-0.782755	Unmethy	-1.93109	Unmethy	-3.08578	Margin	-1.65652	Margin	-1.59247	Margin	-1.38963	Margin	-1.4536
cg15253861	6	33148721	HLA-DPA1	NM_033554	Body	NA	Asthma	Margin	-0.657877	Margin	-0.126536	Methy	1.21893	Margin	0.0034995	Margin	-1.25653	Unmethy	-3.76839	Unmethy	-2.09555	Margin	-0.878797	Margin	-0.927926	Margin	-1.20423
cg00403478	6	33148747	HLA-DPA1	NM_033554	Body	NA	Asthma	Margin	-1.15503	Margin	-0.873623	Margin	0.00327872	Margin	-0.766549	Margin	-1.44458	Unmethy	-3.34454	Unmethy	-1.88783	Margin	-1.58615	Unmethy	-1.63375	Unmethy	-1.76067
cg13906813	6	33148892	HLA-DPA1	NM_033554	Body	NA	Asthma	Margin	-1.04721	Margin	-0.400582	Margin	0.782548	Margin	0.103665	Margin	-1.28023	Unmethy	-2.97005	Unmethy	-2.17447	Margin	-1.6034	Unmethy	-1.69854	Unmethy	-1.9123
cg01804934	6	33149207	HLA-DPA1	NM_033554	Body	NA	Asthma	Margin	-1.73948	Margin	-1.01778	Margin	-0.112276	Margin	-1.05167	Unmethy	-2.08823	Unmethy	-3.38734	Unmethy	-3.17274	Unmethy	-2.82912	Unmethy	-2.72184	Unmethy	-2.88073
cg24287218	6	33149246	HLA-DPA1	NM_033554	1stExon	NA	Asthma	Margin	-1.89101	Margin	-1.37516	Margin	-0.57784	Margin	-1.06282	Unmethy	-2.17433	Unmethy	-3.21433	Unmethy	-3.04106	Unmethy	-2.94639	Unmethy	-2.91338	Unmethy	-2.95395
cg09321817	6	33149321	HLA-DPA1	NM_033554	1stExon	NA	Asthma	Unmethy	-2.75236	Unmethy	-2.03559	Margin	-1.12046	Margin	-1.40684	Unmethy	-2.8968	Unmethy	-3.55584	Unmethy	-3.51285	Unmethy	-3.30544	Unmethy	-3.32537	Unmethy	-3.3316
cg00798281	6	33149675	HLA-DPA1	NM_033554	TSS1500	NA	Asthma	Margin	-1.39022	Margin	-1.1046	Margin	-0.832484	Margin	-1.37102	Margin	-1.64058	Unmethy	-2.08144	Unmethy	-2.31796	Unmethy	-2.19175	Unmethy	-2.05381	Unmethy	-1.98119
cg12865025	6	33150529	HLA-DPB1;HLA-DPA1	NM_002121;NM_033554	TSS1500;TSS1500	NA	Asthma	Methy	2.14422	Methy	2.50092	Methy	2.46771	Methy	1.97001	Methy	2.78833	Margin	0.814233	Methy	3.24436	Methy	2.34877	Methy	2.40526	Methy	2.80264
cg23750365	6	33151050	HLA-DPB1	NM_002121	TSS1500	NA	Asthma	Methy	3.40747	Methy	3.03746	Methy	3.66446	Methy	3.03577	Methy	2.98491	Margin	0.959025	Methy	3.43095	Methy	3.55765	Methy	3.6214	Methy	3.52526
cg18827221	6	33151072	HLA-DPB1	NM_002121	TSS1500	NA	Asthma	Methy	2.43955	Methy	2.3398	Methy	3.04107	Methy	2.16418	Methy	2.02208	Margin	0.206354	Methy	2.50791	Methy	2.68104	Methy	2.67096	Methy	2.76753
cg08405587	6	33151116	HLA-DPB1	NM_002121	TSS1500	NA	Asthma	Margin	0.835455	Margin	0.882866	Methy	1.04065	Margin	0.606019	Margin	0.7492	Margin	-0.251582	Margin	0.663178	Methy	0.752441	Margin	0.793893	Margin	0.698465
cg21151963	6	33151198	HLA-DPB1	NM_002121	TSS1500	NA	Asthma	Methy	2.86652	Methy	2.58147	Methy	3.27101	Methy	2.30565	Methy	2.0357	Margin	0.818074	Methy	3.09686	Methy	3.03462	Methy	3.10112	Methy	3.35688
cg02286081	6	33151819	HLA-DPB1	NM_002121	1stExon	NA	Asthma	Margin	-1.82044	Margin	-1.72359	Margin	-1.17534	Unmethy	-2.07889	Unmethy	-2.40947	Unmethy	-2.94129	Unmethy	-2.03948	Unmethy	-1.97264	Unmethy	-1.90494	Unmethy	-1.91866
cg22483030	6	33151827	HLA-DPB1	NM_002121	1stExon	NA	Asthma	Margin	-1.25744	Margin	-1.08925	Margin	-0.758418	Margin	-1.32586	Margin	-1.74572	Unmethy	-2.11429	Margin	-1.44213	Margin	-1.4822	Margin	-1.37201	Unmethy	-1.53386
cg26350754	6	33151846	HLA-DPB1	NM_002121	1stExon	NA	Asthma	Margin	-1.47024	Margin	-1.40058	Margin	-0.980274	Margin	-1.80601	Unmethy	-2.14878	Unmethy	-2.63352	Margin	-1.67307	Margin	-1.57712	Unmethy	-1.59854	Unmethy	-1.62489
cg12939283	6	33151990	HLA-DPB1	NM_002121	Body	NA	Asthma	Margin	-1.54996	Margin	-1.31897	Margin	-0.779363	Margin	-1.93683	Unmethy	-2.15812	Unmethy	-2.55923	Margin	-1.62979	Margin	-1.74628	Unmethy	-1.54301	Unmethy	-1.5176
cg14356799	6	33152323	HLA-DPB1	NM_002121	Body	NA	Asthma	Unmethy	-2.10359	Unmethy	-1.87651	Margin	-1.05819	Unmethy	-2.09602	Unmethy	-2.87497	Unmethy	-3.36046	Unmethy	-2.71272	Unmethy	-2.60408	Unmethy	-2.55195	Unmethy	-2.85732
cg00750366	6	33152488	HLA-DPB1	NM_002121	Body	N_Shelf	Asthma	Margin	-0.939766	Margin	-0.488357	Margin	0.503656	Margin	-0.452652	Margin	-1.19336	Unmethy	-2.49057	Unmethy	-2.19043	Margin	-1.75517	Unmethy	-1.76625	Unmethy	-1.56778
cg17350632	6	33153713	HLA-DPB1	NM_002121	Body	N_Shelf	Asthma	Methy	1.17465	Methy	1.22528	Methy	2.46766	Methy	0.91556	Margin	0.307979	Margin	-1.22816	Methy	0.689969	Methy	1.49531	Methy	1.39946	Methy	1.39171
cg04885678	6	33154322	HLA-DPB1	NM_002121	Body	N_Shelf	Asthma	Methy	2.06045	Methy	2.01628	Methy	2.30853	Methy	1.33135	Methy	2.09869	Margin	0.0575735	Methy	3.00854	Methy	2.57362	Methy	2.70075	Methy	2.61605
cg10136841	6	33154560	HLA-DPB1	NM_002121	Body	N_Shore	Asthma	Methy	2.03676	Methy	2.04404	Methy	2.13024	Methy	2.16662	Methy	2.14735	Margin	0.835237	Methy	2.26919	Methy	2.08934	Methy	2.25073	Methy	2.38486
cg17071868	6	33155034	HLA-DPB1	NM_002121	Body	N_Shore	Asthma	Methy	2.28037	Methy	2.17901	Methy	2.44419	Methy	1.67646	Methy	1.83998	Margin	-0.356923	Methy	3.14956	Methy	2.83843	Methy	2.93789	Methy	2.85118
cg15734436	6	33155163	HLA-DPB1	NM_002121	Body	N_Shore	Asthma	Methy	1.893	Methy	2.08324	Methy	2.73967	Methy	2.57842	Methy	2.53482	Margin	0.594578	Methy	1.77518	Methy	1.72435	Methy	1.54441	Methy	1.54344
cg09059466	6	33156064	HLA-DPB1	NM_002121	Body	N_Shore	Asthma	Methy	1.1251	Margin	0.884712	Methy	1.15087	Methy	1.41207	Methy	1.58952	Margin	0.839755	Methy	1.27928	Methy	0.898207	Methy	0.975004	Methy	1.05082
cg19053046	6	33156232	HLA-DPB1	NM_002121	Body	N_Shore	Asthma	Methy	1.10323	Methy	1.17842	Methy	1.07444	Methy	0.986886	Methy	1.41557	Margin	1.09903	Methy	1.28677	Methy	1.16359	Methy	1.17576	Methy	1.16706
cg02692313	6	33156422	HLA-DPB1	NM_002121	Body	Island	Asthma	Methy	0.988472	Methy	1.18691	Margin	0.90237	Margin	0.869872	Methy	1.3388	Margin	1.15889	Methy	1.46755	Methy	1.21911	Methy	1.13164	Methy	1.12259
cg03229061	6	33156461	HLA-DPB1	NM_002121	Body	Island	Asthma	Margin	0.776215	Margin	0.992083	Margin	0.806138	Margin	0.748101	Methy	1.05727	Margin	0.968003	Methy	0.932889	Methy	0.953341	Margin	0.898202	Methy	0.916056
cg17588455	6	33156463	HLA-DPB1	NM_002121	Body	Island	Asthma	Margin	0.532787	Margin	0.785715	Margin	0.592339	Margin	0.603907	Methy	1.0744	Margin	0.839284	Margin	0.595695	Margin	0.585505	Margin	0.535045	Margin	0.637009
cg06437840	6	33156507	HLA-DPB1	NM_002121	Body	Island	Asthma	Methy	1.08248	Margin	0.877589	Margin	0.834444	Margin	0.901832	Methy	1.17951	Margin	0.904458	Methy	1.03923	Methy	1.13782	Margin	0.905698	Methy	1.0261
cg01132696	6	33156536	HLA-DPB1	NM_002121	Body	Island	Asthma	Margin	0.883986	Methy	1.17936	Methy	1.09423	Margin	0.866787	Methy	1.01164	Margin	1.11399	Methy	0.910792	Methy	1.08046	Margin	0.833222	Methy	0.990411
cg12893780	6	33156730	HLA-DPB1	NM_002121	Body	Island	Asthma	Methy	1.16593	Methy	1.48952	Methy	1.40827	Methy	1.61281	Methy	1.87554	Methy	1.5404	Methy	1.09805	Methy	0.945123	Margin	0.898691	Methy	1.12018
cg05798641	6	33156897	HLA-DPB1	NM_002121	Body	S_Shore	Asthma	Methy	1.30779	Methy	1.67053	Methy	2.08829	Methy	1.88739	Methy	1.79219	Margin	0.501915	Methy	1.39919	Methy	1.25524	Methy	1.31989	Methy	1.2947
cg23333490	6	33158719	HLA-DPB1	NM_002121	Body	S_Shore	Asthma	Margin	0.756176	Methy	1.48375	Methy	2.35614	Methy	2.95108	Methy	2.49642	Methy	2.27638	Margin	-0.176978	Margin	0.159422	Margin	-0.280412	Margin	0.411394
cg04504217	6	33160309	HLA-DPB1	NM_002121	Body	S_Shelf	Asthma	Margin	0.482388	Margin	0.480526	Margin	0.296765	Margin	0.430046	Margin	0.0457952	Margin	0.455276	Methy	0.675815	Margin	0.283676	Margin	0.601402	Margin	0.508056
cg25343661	6	43851159	VEGFA;VEGFA;VEGFA;VEGFA;VEGFA;VEGFA;VEGFA;VEGFA;VEGFA;VEGFA;VEGFA;VEGFA;VEGFA;VEGFA;VEGFA;VEGFA	NM_001171622;NM_003376;NM_001025366;NM_001171627;NM_001025368;NM_001171629;NM_001025369;NM_001033756;NM_001171630;NM_001171626;NM_001171628;NM_001025370;NM_001171625;NM_001025367;NM_001171623;NM_001171624	Body;Body;Body;Body;Body;Body;Body;Body;Body;Body;Body;Body;Body;Body;Body;Body	S_Shelf	T2D	Margin	0.73351	Methy	1.23689	Methy	1.60625	Methy	2.13248	Methy	2.04434	Methy	1.28362	Margin	0.348041	Margin	0.0659625	Margin	0.212961	Margin	0.523215
cg16907527	6	43852366	VEGFA;VEGFA;VEGFA;VEGFA;VEGFA;VEGFA;VEGFA;VEGFA;VEGFA;VEGFA;VEGFA;VEGFA;VEGFA;VEGFA;VEGFA;VEGFA	NM_001171622;NM_003376;NM_001025366;NM_001171627;NM_001025368;NM_001171629;NM_001025369;NM_001033756;NM_001171630;NM_001171626;NM_001171628;NM_001025370;NM_001171625;NM_001025367;NM_001171623;NM_001171624	Body;Body;Body;Body;Body;Body;Body;Body;Body;Body;Body;Body;Body;Body;Body;Body	NA	T2D	Methy	2.69829	Methy	2.90753	Methy	2.96064	Methy	2.71581	Methy	2.23536	Methy	2.09517	Methy	2.72853	Methy	2.33442	Methy	1.84751	Margin	0.39213
cg03143046	6	43865985	NA	NA	NA	NA	T2D	Margin	-0.350733	Margin	0.741791	Methy	1.9949	Methy	2.1744	Methy	1.64695	Methy	2.38833	Unmethy	-2.94114	Unmethy	-2.60506	Unmethy	-3.39556	Unmethy	-3.72608
cg12682870	6	43874782	NA	NA	NA	NA	T2D	Margin	-1.03212	Margin	-0.151367	Margin	0.900545	Margin	0.533586	Margin	0.0706449	Margin	-0.296356	Unmethy	-3.22591	Unmethy	-2.95007	Unmethy	-3.48745	Unmethy	-3.52493
cg02272576	6	43976942	LOC100132354	NR_024478	Body	NA	T2D	Margin	-0.272575	Methy	1.64933	Methy	2.92115	Methy	3.48411	Methy	3.07205	Methy	3.18458	Margin	0.503658	Margin	-1.2689	Margin	-0.745151	Unmethy	-2.70533
cg03316570	6	43985635	LOC100132354	NR_024478	Body	NA	T2D	Methy	1.03694	Margin	0.599807	Margin	0.136982	Margin	-0.186631	Margin	-0.161974	Margin	0.140231	Methy	1.69847	Methy	1.53021	Methy	1.7502	Methy	1.59812
cg07650681	6	43992985	LOC100132354	NR_024478	Body	NA	T2D	Margin	0.600664	Methy	2.41573	Methy	3.05065	Methy	3.15071	Methy	3.19152	Methy	3.31764	Methy	1.63881	Margin	-0.348252	Margin	0.065365	Methy	1.56362
cg18120259	6	44002617	LOC100132354	NR_024478	Body	NA	T2D	Margin	0.335636	Methy	1.1243	Methy	2.08406	Methy	2.89397	Methy	2.15053	Methy	3.1541	Margin	-1.26415	Margin	-0.334336	Margin	-0.232408	Margin	0.180829
cg26464586	6	44029690	NA	NA	NA	NA	T2D	Methy	1.10952	Methy	1.58031	Methy	2.11023	Methy	2.06994	Methy	1.73059	Methy	1.93858	Methy	0.93513	Margin	0.668314	Margin	0.787074	Margin	0.757628
cg10858195	6	44074777	NA	NA	NA	N_Shelf	T2D	Margin	0.729371	Margin	0.840688	Margin	0.767729	Margin	0.658192	Margin	0.670237	Margin	0.84713	Methy	0.723202	Methy	0.753142	Margin	0.770733	Margin	0.788388
cg02213045	6	44075781	C6orf223	NM_153246	TSS1500	N_Shelf	T2D	Methy	3.14708	Methy	2.76228	Methy	3.16936	Methy	2.72309	Methy	3.05532	Margin	0.267865	Methy	3.28141	Methy	3.56673	Methy	3.53754	Methy	3.49534
cg19274606	6	44076230	C6orf223	NM_153246	TSS200	N_Shore	T2D	Unmethy	-2.34622	Margin	-1.67864	Margin	-1.60471	Margin	-1.64591	Margin	-1.51885	Margin	-1.57879	Unmethy	-2.35363	Unmethy	-2.46596	Unmethy	-2.383	Unmethy	-2.61204
cg14132167	6	90717773	BACH2;BACH2	NM_021813;NM_001170794	Body;Body	NA	T1D	Methy	1.59238	Methy	1.76942	Methy	2.32513	Methy	2.61695	Methy	2.55678	Methy	2.7178	Margin	0.547568	Methy	1.48684	Methy	1.43324	Margin	0.751956
cg17066529	6	90810861	BACH2;BACH2	NM_021813;NM_001170794	5'UTR;5'UTR	NA	T1D	Methy	2.5223	Methy	2.48515	Methy	2.15973	Methy	1.19589	Margin	0.88018	Methy	2.74408	Methy	3.27882	Methy	2.76086	Methy	3.1125	Methy	3.00225
cg17486314	6	90834948	BACH2;BACH2	NM_021813;NM_001170794	5'UTR;5'UTR	NA	T1D	Methy	0.959303	Margin	-0.301929	Margin	-1.26813	Margin	-1.90831	Margin	-1.06001	Margin	0.620679	Margin	0.110604	Methy	1.79596	Methy	1.86919	Methy	2.20373
cg25670076	6	90864396	BACH2;BACH2	NM_021813;NM_001170794	5'UTR;5'UTR	NA	T1D	Margin	0.851352	Methy	1.86989	Methy	2.64331	Methy	3.3858	Methy	3.11707	Methy	2.37713	Margin	-0.942275	Margin	-0.617683	Margin	-0.70885	Unmethy	-2.09044
cg27644327	6	90902573	BACH2;BACH2	NM_021813;NM_001170794	5'UTR;5'UTR	NA	T1D	Margin	-1.055	Margin	-0.0384071	Margin	0.718719	Margin	0.129463	Margin	0.975397	Methy	1.28847	Unmethy	-3.1472	Unmethy	-2.59907	Unmethy	-3.40433	Unmethy	-3.23193
cg09818385	6	90935358	BACH2;BACH2	NM_021813;NM_001170794	5'UTR;5'UTR	NA	T1D	Methy	1.19593	Margin	0.681813	Margin	0.133302	Margin	-0.45958	Margin	0.157825	Margin	0.893799	Methy	1.5812	Methy	1.61372	Methy	1.36911	Margin	0.553066
cg09757525	6	90985295	BACH2;BACH2	NM_021813;NM_001170794	5'UTR;5'UTR	NA	T1D	Unmethy	-2.10134	Unmethy	-2.36494	Unmethy	-2.74795	Unmethy	-2.6824	Unmethy	-2.4313	Unmethy	-3.02319	Unmethy	-2.7872	Margin	-1.60495	Unmethy	-1.70169	Unmethy	-1.79711
cg24700316	6	91000283	BACH2;BACH2	NM_021813;NM_001170794	5'UTR;5'UTR	NA	T1D	Methy	1.83012	Methy	1.30018	Margin	0.302354	Margin	0.0376962	Methy	1.46848	Methy	2.77921	Methy	2.30665	Methy	2.25906	Methy	2.34383	Methy	2.50495
cg18477569	6	91007855	BACH2;BACH2	NM_021813;NM_001170794	5'UTR;5'UTR	NA	T1D	Margin	0.0209783	Margin	0.807031	Methy	2.06444	Methy	1.76703	Methy	1.2326	Methy	1.46928	Margin	-1.16017	Margin	-0.57301	Margin	-0.729082	Unmethy	-1.66897
cg20768122	6	91054444	BACH2;BACH2	NM_021813;NM_001170794	5'UTR;5'UTR	NA	T1D	Methy	2.37395	Methy	2.55555	Methy	2.47826	Methy	2.36687	Methy	3.03115	Margin	0.490146	Methy	3.35341	Methy	3.18915	Methy	3.02593	Methy	3.37567
cg03035849	6	91059921	BACH2;BACH2	NM_021813;NM_001170794	5'UTR;5'UTR	N_Shore	T1D	Methy	2.47855	Methy	1.73483	Margin	0.624002	Margin	0.626095	Methy	3.16209	Methy	2.35076	Methy	3.15089	Methy	3.4126	Methy	3.53342	Methy	3.57798
cg19576099	6	106638184	NA	NA	NA	N_Shelf	SLE	Methy	2.14229	Methy	1.36548	Margin	0.596645	Margin	0.465479	Margin	0.214361	Methy	1.34133	Methy	2.98705	Methy	2.72846	Methy	2.8089	Methy	2.93403
cg24040346	6	106640618	PRDM1	NM_001198	TSS1500	N_Shore	SLE	Unmethy	-3.37046	Unmethy	-2.7691	Unmethy	-2.25587	Margin	-1.95356	Margin	-1.85064	Unmethy	-4.41121	Unmethy	-4.33682	Unmethy	-4.07827	Unmethy	-4.30412	Unmethy	-4.39455
cg00555933	6	106640634	PRDM1	NM_001198	TSS1500	N_Shore	SLE	Unmethy	-2.86009	Unmethy	-2.09645	Unmethy	-2.24037	Margin	-1.78959	Margin	-1.81225	Unmethy	-2.67945	Unmethy	-3.35894	Unmethy	-2.83252	Unmethy	-3.24278	Unmethy	-3.48941
cg02108623	6	106642118	PRDM1	NM_001198	Body	S_Shore	SLE	Margin	-1.46503	Margin	-0.651036	Margin	-0.664298	Margin	-0.0491806	Margin	-0.296015	Margin	0.227374	Unmethy	-3.59147	Unmethy	-2.9784	Unmethy	-2.20873	Unmethy	-1.52517
cg24116687	6	106644684	PRDM1	NM_001198	Body	S_Shelf	SLE	Margin	-1.54624	Margin	-0.923152	Margin	0.0304243	Margin	-0.655311	Margin	-0.967904	Margin	-1.0745	Unmethy	-2.55034	Unmethy	-2.71729	Unmethy	-2.44708	Unmethy	-2.83393
cg17521665	6	106653397	PRDM1;PRDM1	NM_001198;NM_182907	Body;TSS200	NA	SLE	Margin	0.13158	Margin	-0.426259	Unmethy	-2.23756	Unmethy	-2.5932	Margin	-1.83938	Margin	-0.307796	Methy	0.808735	Methy	0.762554	Margin	0.793109	Margin	0.817694
cg14359052	6	106653437	PRDM1;PRDM1	NM_001198;NM_182907	Body;TSS200	NA	SLE	Margin	0.109372	Margin	-0.350211	Unmethy	-1.92265	Unmethy	-2.14613	Margin	-1.69911	Margin	-0.107274	Margin	0.65959	Margin	0.686064	Margin	0.694106	Margin	0.673277
cg24874254	6	106653440	PRDM1;PRDM1	NM_001198;NM_182907	Body;TSS200	NA	SLE	Margin	0.460085	Margin	-0.30217	Unmethy	-2.14239	Margin	-2.02233	Margin	-1.79627	Margin	0.0541778	Methy	0.88098	Methy	1.03397	Methy	1.01846	Methy	0.946726
cg08742502	6	106653447	PRDM1;PRDM1	NM_001198;NM_182907	Body;TSS200	NA	SLE	Margin	0.666095	Margin	-0.10112	Unmethy	-2.30518	Margin	-1.74088	Margin	-1.8722	Margin	0.288548	Methy	1.26094	Methy	1.31368	Methy	1.3812	Methy	1.4231
cg17143179	6	106653517	PRDM1;PRDM1;PRDM1	NM_001198;NM_182907;NM_182907	Body;1stExon;5'UTR	NA	SLE	Methy	1.54031	Margin	0.430939	Margin	-1.37867	Margin	-0.221087	Margin	-1.52232	Margin	0.946368	Methy	2.53109	Methy	2.68789	Methy	2.84212	Methy	2.88755
cg09305161	6	106657725	PRDM1;PRDM1	NM_001198;NM_182907	Body;Body	NA	SLE	Methy	1.05145	Margin	0.876844	Margin	0.786606	Margin	0.369198	Margin	-0.86478	Methy	1.53703	Methy	0.778496	Methy	1.23966	Margin	0.836278	Margin	-1.02436
cg01146808	6	106658061	PRDM1;PRDM1	NM_001198;NM_182907	Body;Body	NA	SLE	Margin	0.719937	Margin	0.674155	Margin	0.501915	Margin	0.230217	Margin	-0.386124	Margin	1.06702	Margin	0.654167	Methy	0.817218	Margin	0.85302	Margin	0.73818
cg16648952	6	106659850	PRDM1;PRDM1	NM_001198;NM_182907	Body;Body	NA	SLE	Methy	5.82868	Margin	5.94306	Margin	5.97528	Margin	5.71403	Unmethy	5.9693	Methy	5.76972	Methy	5.72484	Methy	5.33033	Methy	5.75959	Methy	5.76689
cg08358263	6	106664174	PRDM1;PRDM1	NM_001198;NM_182907	3'UTR;3'UTR	NA	SLE	Methy	2.51226	Methy	2.17178	Methy	2.22839	Methy	1.46782	Margin	0.299098	Methy	2.44205	Methy	2.72274	Methy	2.54782	Methy	2.66952	Methy	2.81937
cg16567330	6	106684251	NA	NA	NA	NA	SLE	Margin	-0.102498	Margin	0.936105	Methy	1.58221	Methy	2.15117	Methy	1.70264	Margin	0.785092	Margin	-0.236863	Margin	-1.17722	Margin	-1.16439	Unmethy	-1.6947
cg25581448	6	106689362	NA	NA	NA	NA	SLE	Methy	6.12069	Unmethy	6.52212	Unmethy	6.63482	Unmethy	6.69614	Unmethy	6.42364	Methy	6.60417	Methy	6.43105	Methy	6.92141	Unmethy	6.56534	Margin	6.26871
cg06367607	6	106709902	NA	NA	NA	NA	SLE	Methy	3.48985	Methy	3.50869	Methy	4.09989	Methy	4.46441	Methy	4.26282	Methy	4.38261	Methy	1.99321	Methy	2.92205	Methy	1.70784	Margin	-1.09163
cg17666418	6	106718695	NA	NA	NA	NA	SLE	Margin	-1.55533	Margin	-0.662695	Margin	0.11298	Margin	-0.277134	Unmethy	-2.64267	Margin	-1.4012	Unmethy	-3.47754	Unmethy	-3.61498	Unmethy	-3.60279	Unmethy	-3.44339
cg10766282	6	106737200	NA	NA	NA	NA	SLE	Methy	2.51904	Methy	2.08446	Methy	2.11673	Methy	1.23402	Margin	0.594876	Methy	1.19393	Methy	3.00663	Methy	2.96158	Methy	2.97958	Methy	2.64532
cg14790600	6	106740997	ATG5	NM_004849	3'UTR	NA	SLE	Margin	0.686864	Margin	0.630507	Margin	0.294241	Margin	-0.262479	Margin	-1.5964	Methy	1.80874	Methy	1.42258	Methy	0.804739	Margin	0.691329	Margin	-0.316076
cg01094114	6	106759684	ATG5	NM_004849	Body	NA	SLE	Methy	2.14351	Methy	1.36923	Methy	1.50959	Margin	0.463482	Margin	-1.40487	Unmethy	-1.79495	Methy	3.06392	Methy	2.93338	Methy	3.06377	Methy	3.03027
cg10669449	6	106782930	ATG5	NM_004849	Body	NA	SLE	Methy	5.41271	Unmethy	6.13994	Methy	5.86141	Unmethy	5.88177	Margin	5.82267	Methy	5.69639	Methy	5.77218	Methy	5.63741	Methy	6.08218	Methy	5.62817
cg20509351	6	106783261	ATG5	NM_004849	Body	NA	SLE	Methy	1.19465	Methy	1.3871	Methy	1.28501	Methy	1.13635	Methy	0.985183	Margin	1.08845	Methy	1.0889	Methy	1.16745	Methy	1.10235	Methy	1.04775
cg04389950	6	106827171	ATG5	NM_004849	Body	NA	SLE	Margin	0.0685017	Methy	1.00453	Methy	1.76878	Methy	1.87372	Methy	1.46092	Methy	1.94185	Margin	0.160741	Margin	-0.750965	Margin	-0.48948	Margin	0.289271
cg14951955	6	106880642	ATG5	NM_004849	TSS1500	S_Shore	SLE	Margin	0.741091	Margin	0.763991	Margin	0.690683	Margin	0.546748	Margin	0.707641	Margin	0.936656	Methy	0.703987	Margin	0.62991	Margin	0.786051	Margin	0.680491
cg20229609	6	126702565	C6orf173	NM_001012507	TSS1500	N_Shore	T1D	Methy	1.65656	Methy	1.45094	Margin	0.0288163	Margin	0.623839	Methy	1.71899	Methy	2.34952	Methy	2.21159	Methy	1.88309	Methy	1.75646	Margin	0.859259
cg15980797	6	137855341	OLIG3;OLIG3	NM_175747;NM_175747	1stExon;3'UTR	N_Shore	RA	Unmethy	-2.34237	Unmethy	-2.12832	Unmethy	-2.09616	Margin	-1.93275	Margin	-1.80624	Unmethy	-1.82735	Unmethy	-2.54569	Unmethy	-2.7222	Unmethy	-2.51513	Unmethy	-2.65646
cg04508701	6	137855571	OLIG3;OLIG3	NM_175747;NM_175747	1stExon;3'UTR	N_Shore	RA	Margin	-1.6857	Margin	-1.69507	Unmethy	-1.66728	Margin	-1.65956	Margin	-1.68726	Margin	-1.53106	Unmethy	-1.93132	Unmethy	-1.92074	Unmethy	-1.96652	Unmethy	-1.87713
cg03602029	6	137855771	OLIG3;OLIG3	NM_175747;NM_175747	1stExon;3'UTR	N_Shore	RA	Margin	-1.15363	Margin	-0.871785	Margin	-0.980983	Margin	-0.640373	Margin	-0.775021	Margin	-0.870284	Margin	-1.4455	Margin	-1.32615	Margin	-1.4419	Unmethy	-1.52586
cg12744820	6	137856653	OLIG3	NM_175747	1stExon	Island	RA	Unmethy	-2.8065	Unmethy	-2.64297	Unmethy	-2.6757	Margin	-1.56894	Unmethy	-2.08532	Margin	-1.22816	Unmethy	-3.71437	Unmethy	-3.98792	Unmethy	-3.82997	Unmethy	-3.77065
cg17295225	6	137856664	OLIG3	NM_175747	1stExon	Island	RA	Margin	-1.58501	Margin	-1.55804	Margin	-1.44609	Margin	-0.98463	Margin	-1.02953	Margin	-0.904275	Unmethy	-2.34454	Unmethy	-2.17704	Unmethy	-2.20789	Unmethy	-2.31542
cg14726488	6	137857265	OLIG3	NM_175747	TSS200	N_Shore	RA	Margin	-1.81648	Unmethy	-1.95181	Unmethy	-2.42525	Unmethy	-2.89464	Unmethy	-2.28763	Margin	-1.3582	Margin	-1.6804	Margin	-1.58444	Unmethy	-1.62962	Unmethy	-1.52121
cg10632395	6	137857341	OLIG3	NM_175747	TSS200	N_Shore	RA	Margin	-1.50523	Margin	-1.42151	Margin	-1.43191	Unmethy	-2.08952	Margin	-1.38726	Margin	-1.04406	Margin	-1.72645	Margin	-1.72898	Unmethy	-1.59864	Unmethy	-1.58909
cg02550277	6	137857392	OLIG3	NM_175747	TSS200	N_Shore	RA	Margin	-1.57701	Margin	-1.3259	Margin	-1.51439	Margin	-1.56464	Margin	-1.36511	Margin	-1.2545	Margin	-1.71995	Margin	-1.7062	Unmethy	-1.62899	Unmethy	-1.67719
cg20336981	6	137858168	OLIG3	NM_175747	TSS1500	Island	RA	Margin	-1.82822	Margin	-1.6999	Margin	-1.60711	Margin	-1.45035	Margin	-1.55144	Margin	-1.2954	Unmethy	-2.12029	Unmethy	-2.00492	Unmethy	-2.03396	Unmethy	-1.96175
cg15324651	6	137858313	OLIG3	NM_175747	TSS1500	Island	RA	Margin	-1.87961	Unmethy	-1.75558	Unmethy	-1.74221	Margin	-1.73301	Margin	-1.75432	Margin	-1.60183	Unmethy	-2.15965	Unmethy	-2.14002	Unmethy	-2.06442	Unmethy	-2.08739
cg01889237	6	137858316	OLIG3	NM_175747	TSS1500	Island	RA	Margin	-1.33848	Margin	-1.27301	Margin	-1.26118	Margin	-1.17704	Margin	-1.19792	Margin	-1.11007	Margin	-1.72436	Margin	-1.67103	Unmethy	-1.69391	Unmethy	-1.62282
cg05510665	6	137876300	NA	NA	NA	NA	RA	Unmethy	-2.81109	Unmethy	-2.41776	Unmethy	-2.05852	Margin	-1.91709	Unmethy	-2.11937	Unmethy	-2.67555	Unmethy	-3.17077	Unmethy	-3.14705	Unmethy	-3.20862	Unmethy	-3.11007
cg03602071	6	137885302	NA	NA	NA	NA	RA	Margin	-0.0349077	Margin	0.785055	Methy	1.02605	Methy	1.1712	Methy	1.02484	Methy	1.20479	Margin	0.161154	Margin	-0.709229	Margin	-0.533871	Margin	-0.262349
cg05124190	6	137994426	NA	NA	NA	NA	RA	Methy	2.94507	Methy	3.18955	Methy	2.29263	Methy	2.92377	Methy	3.25312	Methy	2.71427	Methy	3.70924	Methy	3.29452	Methy	2.69743	Margin	0.453252
cg20470975	6	138143000	NA	NA	NA	NA	RA	Margin	0.781554	Methy	1.23031	Methy	1.60697	Methy	1.46747	Methy	1.25119	Methy	1.72094	Margin	0.392735	Margin	0.624101	Margin	0.700288	Margin	0.444244
cg26400113	6	138161912	NA	NA	NA	NA	RA	Methy	2.05087	Methy	1.20384	Margin	-0.953853	Margin	-0.532465	Methy	1.55873	Methy	3.37651	Methy	3.43924	Methy	3.05797	Methy	3.42927	Methy	3.73008
cg18669406	6	138186854	NA	NA	NA	NA	RA	Unmethy	-3.01969	Unmethy	-2.20164	Unmethy	-3.259	Unmethy	-3.62086	Unmethy	-3.17479	Margin	-0.439135	Unmethy	-1.88811	Unmethy	-3.66054	Unmethy	-3.36098	Unmethy	-3.52927
cg22014112	6	138234351	TNFAIP3	NM_006290	Body	S_Shelf	RA,SLE	Methy	2.58897	Methy	1.40284	Margin	-0.514658	Margin	-1.66118	Margin	0.134144	Margin	1.09156	Methy	4.64998	Methy	4.16478	Methy	4.23657	Methy	4.17685
cg08919597	6	138236517	TNFAIP3	NM_006290	Body	NA	RA,SLE	Unmethy	-1.93265	Margin	-0.870437	Margin	-0.665003	Margin	-0.112014	Margin	0.0431418	Unmethy	-2.53142	Unmethy	-3.3453	Unmethy	-3.28737	Unmethy	-2.97298	Unmethy	-3.15634
cg12050508	6	138244151	TNFAIP3	NM_006290	3'UTR	NA	RA,SLE	Methy	1.66411	Methy	1.48865	Margin	0.871858	Margin	0.710621	Methy	1.87391	Methy	1.97513	Methy	2.30584	Methy	1.94058	Methy	2.04386	Methy	2.00231
cg23249717	6	167427095	NA	NA	NA	N_Shore	RA	Methy	2.39944	Methy	2.28664	Methy	2.72691	Methy	2.40361	Methy	2.61121	Margin	0.262874	Methy	2.72395	Methy	2.79255	Methy	3.10641	Methy	3.0564
cg26954951	6	167427558	NA	NA	NA	Island	RA	Margin	0.393353	Margin	-0.0864092	Margin	-0.327575	Unmethy	-2.20599	Margin	-0.936864	Unmethy	-2.14608	Methy	0.894813	Methy	0.981206	Methy	1.11505	Methy	1.72493
cg21839211	6	167428031	NA	NA	NA	S_Shore	RA	Unmethy	-2.2536	Unmethy	-2.06179	Margin	-1.5642	Unmethy	-2.26221	Unmethy	-2.08228	Unmethy	-3.05676	Unmethy	-3.12203	Unmethy	-2.73195	Unmethy	-2.79839	Unmethy	-2.89363
cg16151362	6	167428043	NA	NA	NA	S_Shore	RA	Unmethy	-2.30118	Unmethy	-1.89858	Margin	-1.19473	Margin	-1.63963	Margin	-1.56204	Unmethy	-3.62284	Unmethy	-3.54597	Unmethy	-3.02572	Unmethy	-3.21777	Unmethy	-3.48983
cg10661263	6	167428160	NA	NA	NA	S_Shore	RA	Methy	1.40582	Methy	1.04655	Methy	1.33794	Methy	0.944763	Methy	1.04782	Margin	-0.092087	Margin	0.194458	Methy	1.4053	Methy	1.29858	Margin	0.692058
cg01205058	6	167428181	NA	NA	NA	S_Shore	RA	Methy	1.14322	Margin	0.829225	Methy	1.26396	Methy	1.01952	Methy	0.986101	Margin	-0.0759997	Margin	0.155687	Methy	1.29839	Methy	1.19178	Margin	0.138414
cg05259303	6	167428216	NA	NA	NA	S_Shore	RA	Methy	1.47513	Methy	1.11906	Methy	1.83674	Methy	1.31928	Methy	1.176	Margin	-0.974982	Margin	0.373614	Methy	2.02891	Methy	1.81194	Methy	0.966627
cg03533561	6	167444105	CCR6	NM_004367	TSS1500	NA	RA	Methy	1.78036	Methy	1.52054	Margin	0.91139	Methy	1.49453	Methy	1.74221	Methy	1.25577	Methy	2.17897	Methy	2.0881	Methy	2.18381	Methy	2.28514
cg09487078	6	167445388	CCR6;CCR6	NM_004367;NM_004367	5'UTR;1stExon	NA	RA	Margin	0.300512	Margin	-0.279994	Margin	-0.823556	Margin	-1.78618	Unmethy	-2.14419	Margin	-1.30207	Methy	0.72279	Margin	0.598429	Margin	0.737485	Margin	0.687973
cg20143758	6	167450333	CCR6	NM_004367	5'UTR	NA	RA	Methy	1.17059	Methy	1.25011	Methy	1.12143	Methy	0.963131	Margin	0.944053	Methy	1.254	Methy	1.59738	Methy	1.33914	Methy	1.44148	Methy	1.44487
cg16523158	6	167455161	CCR6;CCR6	NM_031409;NM_004367	TSS1500;5'UTR	NA	RA	Methy	2.65729	Methy	2.73131	Methy	2.84724	Methy	3.16673	Methy	3.19497	Margin	-0.0883665	Methy	2.70493	Methy	2.73179	Methy	2.86511	Methy	2.97831
cg14192130	6	167455754	CCR6;CCR6	NM_031409;NM_004367	TSS1500;5'UTR	NA	RA	Methy	1.06398	Margin	0.592236	Margin	0.523411	Margin	-0.210417	Margin	-1.508	Unmethy	-3.12083	Methy	2.40947	Methy	2.10404	Methy	2.24072	Methy	2.40866
cg18650263	6	167455899	CCR6;CCR6	NM_031409;NM_004367	TSS1500;5'UTR	NA	RA	Methy	1.81727	Methy	1.5853	Methy	1.56398	Methy	0.989291	Margin	0.202088	Unmethy	-1.87742	Methy	1.65211	Methy	2.08227	Methy	1.78938	Methy	1.96542
cg19954286	6	167456046	CCR6;CCR6	NM_004367;NM_031409	5'UTR;TSS200	NA	RA	Methy	1.83152	Methy	1.06335	Methy	1.11745	Margin	0.878037	Margin	0.044243	Margin	-1.6399	Methy	1.91797	Methy	2.62189	Methy	2.67445	Methy	2.90489
cg21794222	6	167456053	CCR6;CCR6	NM_004367;NM_031409	5'UTR;TSS200	NA	RA	Methy	1.36486	Margin	0.731473	Margin	0.881884	Margin	0.749688	Margin	-0.0757218	Margin	-1.55247	Methy	1.97417	Methy	2.75241	Methy	2.71269	Methy	3.49224
cg15222091	6	167456059	CCR6;CCR6	NM_004367;NM_031409	5'UTR;TSS200	NA	RA	Margin	0.795369	Margin	0.513274	Margin	0.60026	Margin	0.282817	Margin	-0.594065	Margin	-1.26254	Methy	0.816896	Methy	1.17491	Methy	1.40925	Methy	1.88979
cg01646461	6	167456076	CCR6;CCR6	NM_004367;NM_031409	5'UTR;TSS200	NA	RA	Methy	1.35223	Methy	1.01926	Methy	1.37262	Methy	1.2156	Margin	0.102345	Margin	-1.53781	Methy	1.06289	Methy	1.68815	Methy	1.87909	Methy	2.22655
cg05094429	6	167456174	CCR6;CCR6	NM_004367;NM_031409	5'UTR;TSS200	NA	RA	Methy	1.71709	Margin	0.823165	Margin	0.97586	Margin	0.613283	Margin	-0.424607	Unmethy	-2.75165	Methy	1.96616	Methy	2.79909	Methy	2.9813	Methy	3.27162
cg13615963	6	167456511	CCR6;CCR6;CCR6	NM_031409;NM_004367;NM_031409	5'UTR;5'UTR;1stExon	NA	RA	Unmethy	-2.12444	Margin	-1.15872	Margin	-0.194343	Margin	0.0141895	Unmethy	-2.525	Unmethy	-3.23248	Unmethy	-3.81331	Unmethy	-3.63248	Unmethy	-3.27824	Unmethy	-2.43443
cg15377009	7	27904081	JAZF1	NM_175061	Body	NA	T2D	Methy	1.98435	Methy	3.10949	Methy	3.51285	Methy	3.57981	Methy	3.71978	Methy	3.63972	Methy	2.57886	Methy	1.34709	Methy	1.19643	Margin	-0.0791015
cg21919820	7	28048068	JAZF1	NM_175061	Body	NA	T2D	Methy	2.07734	Methy	1.47454	Methy	1.07581	Margin	0.473467	Margin	0.100343	Methy	1.36998	Methy	2.78946	Methy	2.85094	Methy	2.88354	Methy	3.23708
cg23597162	7	28068866	JAZF1	NM_175061	Body	NA	T2D	Margin	0.0450807	Methy	1.38066	Methy	2.30703	Methy	2.721	Methy	2.57388	Methy	2.58731	Margin	-0.298061	Margin	-1.01851	Margin	-0.634006	Methy	1.1754
cg20704555	7	28094273	JAZF1	NM_175061	Body	NA	T2D	Margin	0.206809	Methy	1.61289	Methy	2.66895	Methy	2.82063	Methy	2.48789	Methy	3.13184	Margin	-1.55929	Unmethy	-2.06915	Unmethy	-2.47412	Unmethy	-2.61371
cg26438325	7	28143243	JAZF1	NM_175061	Body	NA	T2D	Methy	1.02483	Methy	1.59218	Methy	2.22854	Methy	2.48248	Methy	2.25113	Methy	3.32669	Margin	0.347464	Margin	0.635915	Margin	0.242203	Unmethy	-1.83378
cg14491535	7	28161615	JAZF1	NM_175061	Body	NA	T2D	Margin	-0.363046	Margin	-0.518136	Margin	-0.372757	Margin	0.904017	Margin	-0.142277	Unmethy	-2.65874	Unmethy	-3.17535	Margin	-0.475547	Margin	-0.52069	Unmethy	-3.00393
cg22938901	7	28167631	JAZF1	NM_175061	Body	NA	T2D	Methy	2.0121	Methy	2.72983	Methy	3.31779	Methy	3.20241	Methy	3.19644	Margin	-0.630417	Methy	2.03549	Methy	1.77349	Methy	1.06724	Margin	-1.16348
cg25941154	7	28175082	JAZF1	NM_175061	Body	NA	T2D	Methy	2.30287	Methy	2.179	Methy	1.93362	Methy	1.50758	Methy	1.80196	Margin	1.0495	Methy	2.67616	Methy	2.46876	Methy	2.76347	Methy	2.83998
cg02010481	7	28185049	JAZF1	NM_175061	Body	N_Shore	T2D	Margin	-1.70821	Margin	-0.364242	Margin	0.367273	Margin	0.361954	Margin	-0.246711	Margin	-0.0812537	Unmethy	-2.93103	Unmethy	-3.89243	Unmethy	-4.03517	Unmethy	-3.96982
cg26102728	7	28185458	JAZF1	NM_175061	Body	N_Shore	T2D	Margin	-1.14367	Margin	-0.809012	Margin	-0.29657	Margin	-1.08844	Unmethy	-2.2851	Unmethy	-1.83482	Margin	-1.32681	Margin	-1.50238	Margin	-1.49622	Unmethy	-2.41653
cg04266607	7	28188192	JAZF1	NM_175061	TSS1500	S_Shore	T2D	Methy	2.31351	Methy	2.04149	Methy	3.5759	Methy	1.67593	Margin	-0.343847	Margin	0.121573	Methy	3.02664	Methy	2.63688	Methy	1.9452	Margin	-1.2133
cg24559796	7	28189823	NA	NA	NA	S_Shelf	T2D	Methy	1.33658	Methy	2.38798	Methy	3.06736	Methy	3.01398	Methy	3.00888	Methy	3.03603	Methy	2.01517	Margin	0.653025	Margin	0.157685	Unmethy	-1.97679
cg08691328	7	50166920	C7orf72	NM_001161834	Body	N_Shelf	SLE	Unmethy	-1.97852	Margin	-1.3281	Margin	-1.64421	Margin	-0.314016	Margin	0.493401	Margin	-1.69406	Unmethy	-2.74514	Unmethy	-2.60709	Unmethy	-2.64623	Unmethy	-2.79376
cg07832178	7	50169394	C7orf72	NM_001161834	3'UTR	Island	SLE	Methy	5.44577	Methy	5.61943	Margin	5.94543	Methy	5.52776	Methy	5.64482	Methy	5.33893	Methy	5.62073	Methy	5.49307	Methy	5.72672	Methy	5.82174
cg08052546	7	50311756	NA	NA	NA	N_Shore	SLE	Margin	-0.582533	Margin	-0.344989	Methy	3.02281	Methy	1.93653	Methy	1.06286	Methy	1.38101	Methy	1.34412	Methy	1.81036	Methy	2.28307	Methy	1.68033
cg14216940	7	50313677	IKZF1	NM_006060	TSS1500	Island	SLE	Margin	0.0499611	Margin	-0.0697115	Margin	-1.17862	Margin	-0.465408	Margin	0.511861	Methy	1.57736	Margin	0.38486	Margin	0.175751	Margin	0.283556	Margin	0.748717
cg07103517	7	50319031	IKZF1	NM_006060	5'UTR	S_Shelf	SLE	Margin	0.127585	Margin	-0.398843	Unmethy	-2.21137	Unmethy	-3.05046	Margin	-0.744536	Margin	-0.254702	Methy	1.32488	Margin	0.603049	Margin	0.890785	Methy	1.70339
cg19159011	7	50319416	IKZF1	NM_006060	5'UTR	NA	SLE	Margin	-0.364815	Margin	-0.9597	Unmethy	-2.49561	Unmethy	-3.23369	Margin	-1.40691	Margin	-1.60203	Methy	0.769274	Margin	0.0508765	Margin	0.0743819	Margin	0.178169
cg07621224	7	50326052	IKZF1	NM_006060	5'UTR	NA	SLE	Margin	0.187105	Margin	-0.423524	Unmethy	-2.219	Unmethy	-3.42714	Margin	-1.78618	Margin	-0.257911	Methy	0.740466	Margin	0.545533	Margin	0.481504	Margin	0.036177
cg09241714	7	50337394	IKZF1	NM_006060	Body	NA	SLE	Methy	3.38398	Methy	2.98002	Methy	2.92831	Methy	3.00075	Methy	3.15448	Margin	1.11142	Methy	3.74972	Methy	3.22752	Methy	3.62106	Methy	3.21792
cg17157198	7	50337715	IKZF1	NM_006060	Body	NA	SLE	Methy	3.36278	Methy	3.03658	Methy	3.25961	Methy	3.54082	Methy	3.53081	Margin	-0.59383	Methy	3.17423	Methy	3.61237	Methy	3.60882	Methy	2.80015
cg20937750	7	50411533	IKZF1	NM_006060	Body	NA	SLE	Methy	5.48939	Unmethy	5.9676	Methy	5.78125	Methy	5.26701	Methy	5.30754	Methy	5.11985	Methy	5.39171	Methy	5.69157	Methy	5.25859	Methy	5.28015
cg08072980	7	50417814	IKZF1	NM_006060	Body	NA	SLE	Methy	1.03491	Methy	1.00969	Margin	0.884122	Margin	0.719959	Margin	0.68159	Margin	0.66709	Methy	0.70675	Methy	1.07504	Margin	0.674861	Margin	0.635213
cg18743793	7	50432155	IKZF1	NM_006060	Body	N_Shelf	SLE	Methy	1.02084	Margin	0.0881185	Margin	-1.12217	Margin	-0.113141	Margin	-0.183339	Margin	-0.0425713	Margin	0.60738	Methy	1.65626	Methy	1.67036	Methy	1.64442
cg26789038	7	50436216	IKZF1	NM_006060	3'UTR	S_Shore	SLE	Methy	5.7452	Margin	5.8903	Methy	5.64535	Methy	5.64145	Unmethy	6.02108	Methy	5.45923	Methy	5.61858	Methy	5.55045	Methy	5.7017	Methy	5.49795
cg12592691	7	51069517	COBL	NM_015198	Body	NA	T1D	Methy	1.62011	Methy	1.56207	Methy	1.43812	Margin	0.811672	Margin	0.81093	Margin	1.15228	Methy	2.01001	Methy	1.90164	Methy	2.14933	Methy	2.20763
cg05950498	7	51071216	COBL	NM_015198	Body	NA	T1D	Methy	0.946693	Methy	1.13457	Margin	0.953798	Margin	0.874121	Margin	0.957085	Methy	1.22035	Methy	0.809071	Methy	0.855337	Methy	0.979309	Methy	0.897753
cg17727071	7	51137567	COBL	NM_015198	Body	NA	T1D	Methy	1.18543	Margin	0.857212	Margin	0.741038	Margin	0.201016	Margin	-0.786613	Margin	0.465779	Methy	1.20503	Methy	1.49003	Methy	1.04635	Margin	0.707441
cg05843966	7	51140370	COBL	NM_015198	Body	NA	T1D	Methy	1.27155	Methy	1.28509	Methy	1.3117	Methy	0.944472	Methy	1.04197	Margin	1.1189	Methy	0.92491	Methy	1.13066	Methy	1.13604	Methy	1.10385
cg10765387	7	51188064	COBL	NM_015198	Body	NA	T1D	Methy	2.40454	Methy	1.86878	Methy	1.85318	Methy	1.29064	Methy	1.48755	Unmethy	-2.23584	Methy	2.91231	Methy	2.89162	Methy	2.99046	Methy	2.80485
cg07152355	7	51270616	COBL	NM_015198	Body	NA	T1D	Methy	1.5959	Methy	1.13969	Margin	0.713325	Margin	0.303278	Margin	0.409891	Margin	0.750224	Methy	1.7891	Methy	2.2678	Methy	2.28121	Methy	1.77325
cg23122650	7	51326165	COBL	NM_015198	Body	NA	T1D	Methy	1.51776	Methy	1.02269	Margin	0.652746	Margin	0.263748	Margin	0.326408	Margin	0.793532	Methy	1.54361	Methy	1.50036	Methy	1.82076	Methy	1.71838
cg07571451	7	51352425	COBL	NM_015198	TSS1500	Island	T1D	Margin	-1.62165	Margin	-1.39279	Margin	-1.47051	Margin	-1.2264	Margin	-1.28726	Margin	-1.13225	Unmethy	-2.11595	Unmethy	-1.94754	Unmethy	-1.98092	Unmethy	-2.05267
cg14997413	7	51352431	COBL	NM_015198	TSS1500	Island	T1D	Unmethy	-2.17551	Unmethy	-1.94011	Unmethy	-1.95785	Margin	-1.11605	Margin	-1.30753	Margin	-1.34659	Unmethy	-3.18839	Unmethy	-3.01782	Unmethy	-2.91603	Unmethy	-3.19195
cg07413467	7	92076022	CDK6;CDK6	NM_001259;NM_001145306	3'UTR;3'UTR	NA	RA	Methy	1.14573	Methy	1.58973	Methy	2.35644	Methy	2.72288	Methy	1.78539	Methy	1.39276	Methy	0.68636	Margin	0.682524	Margin	0.683428	Margin	0.580902
cg25284397	7	92076092	CDK6;CDK6	NM_001259;NM_001145306	3'UTR;3'UTR	NA	RA	Methy	1.46641	Methy	2.26988	Methy	2.96807	Methy	3.26389	Methy	2.88102	Methy	2.2632	Methy	0.71803	Margin	0.661571	Margin	0.660988	Margin	0.518899
cg06688763	7	92076143	CDK6;CDK6	NM_001259;NM_001145306	3'UTR;3'UTR	NA	RA	Methy	1.3103	Methy	2.55646	Methy	3.79331	Methy	4.29257	Methy	2.54589	Methy	3.55537	Methy	1.56874	Methy	0.735427	Margin	0.679084	Margin	0.801166
cg15261712	7	92076184	CDK6;CDK6	NM_001259;NM_001145306	3'UTR;3'UTR	NA	RA	Methy	1.33497	Methy	1.96523	Methy	2.45804	Methy	2.6708	Methy	1.89646	Methy	1.91611	Methy	1.11956	Methy	0.941661	Margin	0.878901	Methy	1.0344
cg25156198	7	92088932	CDK6;CDK6	NM_001259;NM_001145306	Body;Body	NA	RA	Margin	0.880995	Methy	1.20338	Methy	1.89068	Methy	2.12865	Methy	1.63305	Margin	0.708494	Margin	0.150731	Margin	0.289432	Margin	0.419627	Margin	0.419551
cg05101437	7	92100906	CDK6;CDK6	NM_001259;NM_001145306	Body;Body	NA	RA	Unmethy	-2.92368	Unmethy	-2.27281	Margin	-1.51823	Margin	-2.01432	Unmethy	-3.61704	Unmethy	-2.9679	Unmethy	-3.65798	Unmethy	-3.83017	Unmethy	-3.48666	Unmethy	-3.52744
cg14199261	7	92151385	CDK6;CDK6	NM_001259;NM_001145306	Body;Body	NA	RA	Margin	0.864015	Margin	0.796931	Margin	0.326436	Margin	0.412763	Margin	-0.101178	Methy	2.41216	Methy	1.18143	Methy	0.908946	Margin	0.530163	Margin	-1.24125
cg08300570	7	92191390	CDK6;CDK6	NM_001259;NM_001145306	Body;Body	NA	RA	Margin	0.0558613	Methy	1.55753	Methy	2.87019	Methy	3.4615	Methy	3.02786	Margin	0.925351	Margin	-1.01154	Margin	-1.85551	Margin	-0.735254	Methy	1.26504
cg05278074	7	92280504	CDK6;CDK6	NM_001259;NM_001145306	Body;Body	NA	RA	Methy	1.63443	Methy	1.02614	Margin	-0.712993	Margin	-0.85448	Margin	0.761914	Margin	0.646096	Methy	2.66504	Methy	2.6406	Methy	2.4779	Methy	2.65532
cg09653641	7	92293435	CDK6;CDK6	NM_001259;NM_001145306	Body;Body	NA	RA	Margin	-0.225866	Margin	0.731353	Methy	1.85337	Methy	1.60388	Margin	0.928818	Margin	0.991887	Margin	-1.31255	Margin	-1.28785	Margin	-1.39436	Unmethy	-1.59305
cg07266431	7	92298049	CDK6;CDK6	NM_001259;NM_001145306	Body;Body	N_Shelf	RA	Margin	-1.86912	Margin	-0.697149	Margin	0.0199389	Margin	0.0159588	Margin	-0.362307	Margin	-1.29184	Unmethy	-3.76268	Unmethy	-3.7706	Unmethy	-3.65721	Unmethy	-3.90273
cg19103429	7	92298720	CDK6;CDK6	NM_001259;NM_001145306	Body;Body	N_Shore	RA	Margin	-1.27709	Margin	-0.409299	Margin	0.230469	Margin	0.44987	Margin	-0.0166578	Margin	-0.151226	Unmethy	-1.97922	Unmethy	-2.33459	Unmethy	-2.46918	Unmethy	-2.22404
cg00907204	7	92299907	CDK6;CDK6	NM_001259;NM_001145306	Body;Body	N_Shore	RA	Unmethy	-2.53848	Unmethy	-2.10545	Unmethy	-1.70634	Margin	-1.69225	Unmethy	-2.72293	Unmethy	-2.83536	Unmethy	-3.33809	Unmethy	-3.22372	Unmethy	-3.14837	Unmethy	-3.04285
cg11274371	7	92304624	CDK6	NM_001145306	TSS1500	S_Shore	RA	Unmethy	-2.57932	Unmethy	-1.91773	Margin	-0.811326	Margin	-1.52738	Unmethy	-2.48885	Unmethy	-3.01112	Unmethy	-3.6301	Unmethy	-3.48548	Unmethy	-3.58096	Unmethy	-3.73575
cg16429505	7	100326334	UFSP1;ACHE;ACHE	NM_001015072;NM_000665;NM_015831	TSS1500;Body;3'UTR	N_Shore	T2D	Unmethy	-2.25595	Unmethy	-1.7776	Margin	-1.51796	Margin	-1.23089	Margin	-1.73566	Unmethy	-2.35453	Unmethy	-2.6182	Unmethy	-2.63364	Unmethy	-2.69067	Unmethy	-2.7764
cg23549117	7	100328870	ACHE;ACHE	NM_015831;NM_000665	Body;Body	Island	T2D	Margin	0.588473	Margin	0.649675	Margin	0.603392	Margin	0.300304	Margin	0.460683	Margin	0.747434	Methy	0.758028	Margin	0.574777	Margin	0.729595	Margin	0.80428
cg04380800	7	100329273	ACHE;ACHE	NM_015831;NM_000665	Body;Body	N_Shore	T2D	Methy	5.81669	Margin	5.89248	Margin	5.93711	Methy	5.42806	Methy	5.23788	Methy	6.26403	Methy	6.06736	Methy	5.98533	Methy	6.02243	Methy	5.70792
cg10611760	7	100329650	ACHE;ACHE	NM_015831;NM_000665	Body;Body	N_Shore	T2D	Methy	6.1468	Unmethy	6.47283	Unmethy	6.34477	Margin	5.74047	Unmethy	5.86152	Methy	6.20094	Methy	6.20297	Methy	6.77304	Unmethy	6.35934	Methy	6.10109
cg07069514	7	100332316	ACHE;ACHE	NM_000665;NM_015831	TSS1500;TSS1500	Island	T2D	Margin	-1.8588	Unmethy	-1.87444	Unmethy	-1.8327	Margin	-1.7578	Margin	-1.73851	Unmethy	-1.83341	Unmethy	-2.17464	Unmethy	-2.17	Unmethy	-2.0722	Unmethy	-2.25167
cg19567740	7	128314358	KCP	NM_001135914	Body	N_Shelf	SLE	Methy	1.18553	Methy	1.45889	Methy	1.51851	Methy	1.43914	Methy	1.47903	Margin	0.570717	Methy	1.37943	Methy	1.36587	Methy	1.32752	Methy	1.31144
cg08922068	7	128318036	KCP;KCP	NM_199349;NM_001135914	Body;Body	Island	SLE	Unmethy	-1.98636	Unmethy	-1.84851	Unmethy	-2.05124	Unmethy	-2.09077	Unmethy	-2.18977	Margin	-1.69901	Unmethy	-2.54903	Unmethy	-2.33647	Unmethy	-2.20947	Unmethy	-2.29704
cg02067771	7	128330634	KCP;KCP	NM_199349;NM_001135914	Body;Body	NA	SLE	Methy	2.44899	Methy	2.36271	Methy	2.83039	Methy	2.72985	Methy	2.53038	Margin	0.931084	Methy	2.17653	Methy	2.69747	Methy	2.64383	Methy	2.68671
cg02611085	7	128337646	KCP;KCP	NM_199349;NM_001135914	Body;Body	Island	SLE	Margin	-1.75479	Margin	-1.42222	Margin	-1.12484	Margin	-1.25075	Margin	-1.38765	Margin	-1.4351	Unmethy	-2.57046	Unmethy	-2.39681	Unmethy	-2.41482	Unmethy	-2.40732
cg17150663	7	128338908	KCP;KCP	NM_001135914;NM_199349	TSS1500;TSS1500	S_Shore	SLE	Margin	0.805357	Margin	0.956809	Methy	1.43244	Margin	0.635325	Margin	0.218974	Methy	2.41948	Margin	0.319069	Methy	0.789101	Methy	1.03334	Methy	1.73622
cg11343464	7	128342897	NA	NA	NA	Island	RA,SLE	Margin	-1.38381	Margin	-1.35294	Margin	-1.13413	Margin	-1.11419	Margin	-1.19395	Margin	-1.38082	Unmethy	-2.00072	Margin	-1.81168	Unmethy	-1.8126	Unmethy	-1.71495
cg02092102	7	128343132	NA	NA	NA	Island	RA,SLE	Margin	-1.61079	Margin	-1.43193	Margin	-1.46194	Margin	-1.35616	Margin	-1.28223	Margin	-1.20585	Margin	-1.83367	Margin	-1.77918	Unmethy	-1.71076	Unmethy	-1.7814
cg03603395	7	128346859	NA	NA	NA	S_Shelf	RA,SLE	Methy	2.10399	Methy	1.96154	Methy	2.00841	Methy	1.28564	Methy	1.34213	Margin	0.906586	Methy	2.58582	Methy	2.24957	Methy	2.47252	Methy	2.4824
cg26204039	7	128361630	NA	NA	NA	N_Shelf	RA,SLE	Methy	1.95947	Methy	1.93938	Methy	2.24864	Methy	1.91954	Methy	1.40161	Margin	0.638381	Methy	2.02362	Methy	2.3139	Methy	2.43122	Methy	2.6706
cg09387224	7	128361646	NA	NA	NA	N_Shelf	RA,SLE	Methy	2.98603	Methy	2.58108	Methy	3.2517	Methy	2.03987	Methy	2.57684	Margin	0.999836	Methy	2.82478	Methy	3.05303	Methy	2.94981	Methy	3.13503
cg12816198	7	128364829	IRF5;IRF5;IRF5;IRF5;IRF5;IRF5	NM_001098630;NM_032643;NM_001098629;NM_001098628;NM_001098631;NM_002200	TSS1500;TSS1500;TSS1500;TSS1500;TSS1500;TSS1500	N_Shore	RA,SLE	Methy	1.08357	Methy	1.69444	Methy	2.89535	Methy	3.40014	Methy	2.44472	Margin	-0.815337	Margin	-0.527233	Methy	0.801306	Margin	0.472264	Margin	0.487216
cg14349538	7	128364887	IRF5;IRF5;IRF5;IRF5;IRF5;IRF5	NM_001098630;NM_032643;NM_001098629;NM_001098628;NM_001098631;NM_002200	TSS1500;TSS1500;TSS1500;TSS1500;TSS1500;TSS1500	N_Shore	RA,SLE	Unmethy	-2.41025	Unmethy	-1.84517	Margin	-0.873053	Margin	-1.07686	Margin	-1.90255	Unmethy	-4.33524	Unmethy	-4.36341	Unmethy	-3.77596	Unmethy	-4.09046	Unmethy	-4.52888
cg26616347	7	128364988	IRF5;IRF5;IRF5;IRF5;IRF5;IRF5	NM_001098630;NM_032643;NM_001098629;NM_001098628;NM_001098631;NM_002200	TSS1500;TSS1500;TSS1500;TSS1500;TSS1500;TSS1500	N_Shore	RA,SLE	Margin	-1.82508	Margin	-1.5093	Margin	-1.05323	Margin	-1.2673	Margin	-1.64649	Unmethy	-2.73966	Unmethy	-2.78015	Unmethy	-2.48463	Unmethy	-2.5825	Unmethy	-2.70762
cg06630958	7	128365055	IRF5;IRF5;IRF5;IRF5;IRF5;IRF5	NM_001098630;NM_032643;NM_002200;NM_001098628;NM_001098629;NM_001098631	TSS200;TSS1500;TSS200;TSS200;TSS200;TSS1500	Island	RA,SLE	Unmethy	-2.2672	Unmethy	-1.9752	Unmethy	-1.76978	Margin	-1.6087	Unmethy	-1.90407	Unmethy	-2.88214	Unmethy	-2.96376	Unmethy	-2.77049	Unmethy	-2.83112	Unmethy	-2.69526
cg08100944	7	128365782	IRF5;IRF5;IRF5;IRF5;IRF5;IRF5	NM_001098630;NM_032643;NM_001098631;NM_002200;NM_001098629;NM_001098628	5'UTR;5'UTR;5'UTR;5'UTR;5'UTR;5'UTR	Island	RA,SLE	Unmethy	-2.25918	Unmethy	-1.99461	Unmethy	-2.07294	Margin	-1.90737	Unmethy	-1.984	Margin	-1.70616	Unmethy	-2.54814	Unmethy	-2.43427	Unmethy	-2.47833	Unmethy	-2.38842
cg01377503	7	128365991	IRF5;IRF5;IRF5;IRF5;IRF5;IRF5	NM_001098630;NM_032643;NM_001098631;NM_002200;NM_001098629;NM_001098628	5'UTR;5'UTR;5'UTR;5'UTR;5'UTR;5'UTR	Island	RA,SLE	Unmethy	-1.94781	Unmethy	-1.8025	Unmethy	-1.65253	Margin	-1.705	Margin	-1.81134	Unmethy	-1.89261	Unmethy	-2.41723	Unmethy	-2.30399	Unmethy	-2.27217	Unmethy	-2.18983
cg13914531	7	128367112	IRF5;IRF5;IRF5;IRF5;IRF5;IRF5;IRF5	NM_001098630;NM_001098627;NM_032643;NM_001098631;NM_002200;NM_001098629;NM_001098628	5'UTR;TSS1500;5'UTR;5'UTR;5'UTR;5'UTR;5'UTR	S_Shore	RA,SLE	Margin	-1.28303	Margin	-0.608829	Margin	-0.143859	Margin	0.00492564	Margin	-0.177139	Unmethy	-2.76093	Unmethy	-2.52623	Unmethy	-2.76902	Unmethy	-2.45385	Unmethy	-1.94275
cg05904013	7	128367169	IRF5;IRF5;IRF5;IRF5;IRF5;IRF5;IRF5	NM_001098630;NM_001098627;NM_032643;NM_001098631;NM_002200;NM_001098629;NM_001098628	5'UTR;TSS1500;5'UTR;5'UTR;5'UTR;5'UTR;5'UTR	S_Shore	RA,SLE	Margin	-0.392894	Margin	0.583503	Methy	1.45733	Methy	1.85627	Methy	1.42736	Margin	-0.382312	Margin	-0.526576	Margin	-1.81528	Margin	-0.981697	Margin	0.504207
cg04864179	7	128367200	IRF5;IRF5;IRF5;IRF5;IRF5;IRF5;IRF5	NM_001098630;NM_001098627;NM_032643;NM_001098631;NM_002200;NM_001098629;NM_001098628	5'UTR;TSS1500;5'UTR;5'UTR;5'UTR;5'UTR;5'UTR	S_Shore	RA,SLE	Margin	0.22121	Methy	1.20911	Methy	2.41565	Methy	3.05128	Methy	2.0702	Margin	-0.124769	Margin	0.196283	Margin	-0.522849	Margin	-0.13948	Methy	1.04842
cg24126180	7	128367818	IRF5;IRF5;IRF5;IRF5;IRF5;IRF5;IRF5	NM_001098630;NM_032643;NM_001098631;NM_002200;NM_001098629;NM_001098627;NM_001098628	5'UTR;5'UTR;5'UTR;5'UTR;5'UTR;TSS200;5'UTR	S_Shore	RA,SLE	Margin	-1.20887	Margin	-0.370152	Margin	0.549164	Margin	0.504925	Margin	-0.271915	Unmethy	-3.4663	Unmethy	-3.44099	Unmethy	-3.01398	Unmethy	-3.43892	Unmethy	-3.54999
cg00140447	7	128367945	IRF5;IRF5;IRF5;IRF5;IRF5;IRF5;IRF5	NM_001098630;NM_032643;NM_001098631;NM_002200;NM_001098629;NM_001098627;NM_001098628	5'UTR;5'UTR;5'UTR;5'UTR;5'UTR;TSS200;5'UTR	S_Shore	RA,SLE	Margin	-1.71615	Margin	-1.27657	Margin	-0.727655	Margin	-0.545283	Margin	-1.38585	Unmethy	-2.93101	Unmethy	-2.87436	Unmethy	-2.96484	Unmethy	-3.04295	Unmethy	-3.05716
cg04086097	7	128368028	IRF5;IRF5;IRF5;IRF5;IRF5;IRF5;IRF5;IRF5	NM_001098630;NM_032643;NM_001098631;NM_001098627;NM_002200;NM_001098629;NM_001098627;NM_001098628	5'UTR;5'UTR;5'UTR;5'UTR;5'UTR;5'UTR;1stExon;5'UTR	S_Shelf	RA,SLE	Unmethy	-2.28949	Margin	-1.0986	Margin	0.275066	Margin	0.633981	Margin	-1.00678	Unmethy	-4.42685	Unmethy	-4.44682	Unmethy	-3.98263	Unmethy	-4.34703	Unmethy	-4.49661
cg16287740	7	128382282	TNPO3	NM_012470	3'UTR	NA	RA,SLE	Methy	2.12119	Methy	1.75461	Methy	2.32207	Methy	3.16728	Methy	2.7643	Margin	-1.29614	Methy	0.702564	Methy	2.35413	Methy	2.57732	Methy	2.24735
cg02193925	7	128479952	TNPO3	NM_012470	Body	N_Shore	RA,SLE	Methy	1.76601	Methy	2.47501	Methy	2.22179	Methy	1.56474	Methy	2.26134	Methy	2.47034	Methy	3.04275	Methy	1.68313	Methy	2.02572	Margin	0.653077
cg27664783	7	128481222	LOC286016;TNPO3	NR_002187;NM_012470	TSS1500;Body	N_Shore	RA,SLE	Margin	-0.959316	Margin	-0.814971	Margin	-1.03035	Margin	-1.11727	Margin	-1.21921	Margin	-0.951199	Margin	-1.01541	Margin	-1.12163	Margin	-1.20362	Unmethy	-1.56647
cg22867066	7	128481902	LOC286016;TNPO3	NR_002187;NM_012470	TSS1500;Body	Island	RA,SLE	Margin	-1.45216	Unmethy	-1.80117	Margin	-1.64248	Margin	-1.77208	Margin	-1.73593	Unmethy	-1.89535	Margin	-1.6219	Margin	-1.65931	Unmethy	-1.75405	Unmethy	-1.7147
cg04528819	7	130068855	KLF14	NM_138693	1stExon	Island	T2D	Margin	-1.89674	Unmethy	-1.94098	Unmethy	-2.12957	Margin	-1.79609	Unmethy	-1.98465	Unmethy	-2.08027	Unmethy	-2.14634	Unmethy	-2.086	Unmethy	-2.10231	Unmethy	-2.12932
cg00094518	7	130069089	KLF14	NM_138693	1stExon	Island	T2D	Unmethy	-2.66913	Unmethy	-2.59384	Unmethy	-3.02636	Margin	-1.53569	Margin	-1.40282	Unmethy	-2.91515	Unmethy	-3.1592	Unmethy	-3.18829	Unmethy	-3.50704	Unmethy	-3.65301
cg14361627	7	130069656	KLF14	NM_138693	TSS1500	Island	T2D	Margin	-1.79724	Unmethy	-1.99927	Unmethy	-2.11474	Unmethy	-2.15907	Margin	-1.54417	Unmethy	-2.39526	Unmethy	-2.01162	Margin	-1.88437	Unmethy	-1.98844	Unmethy	-1.99152
cg08719712	7	130070025	KLF14	NM_138693	TSS1500	S_Shore	T2D	Unmethy	-2.30325	Unmethy	-2.03054	Unmethy	-2.17202	Margin	-2.05716	Unmethy	-2.0619	Unmethy	-2.90108	Unmethy	-2.52448	Unmethy	-2.71821	Unmethy	-2.59569	Unmethy	-2.96221
cg06038655	7	130070215	KLF14	NM_138693	TSS1500	S_Shore	T2D	Unmethy	-2.1627	Unmethy	-2.09877	Unmethy	-2.03852	Margin	-1.97457	Margin	-1.73709	Unmethy	-2.04943	Unmethy	-2.5028	Unmethy	-2.27264	Unmethy	-2.33029	Unmethy	-2.38676
cg03914913	7	130070294	KLF14	NM_138693	TSS1500	S_Shore	T2D	Margin	-1.35058	Margin	-1.62055	Margin	-1.26911	Margin	-1.44292	Margin	-0.953817	Margin	-1.58356	Margin	-1.8488	Margin	-1.77669	Unmethy	-1.72303	Unmethy	-1.61724
cg09529138	7	130070332	KLF14	NM_138693	TSS1500	S_Shore	T2D	Unmethy	-2.31307	Unmethy	-2.06865	Unmethy	-1.90636	Margin	-2.05838	Margin	-1.77835	Unmethy	-2.29844	Unmethy	-2.12945	Unmethy	-2.13481	Unmethy	-2.36024	Unmethy	-2.27834
cg02423044	7	130070472	KLF14	NM_138693	TSS1500	S_Shore	T2D	Unmethy	-2.04738	Unmethy	-1.78431	Unmethy	-2.12211	Margin	-1.81873	Margin	-1.57927	Unmethy	-2.28045	Unmethy	-2.42437	Unmethy	-2.2006	Unmethy	-2.45062	Unmethy	-2.42557
cg08616943	7	130203140	NA	NA	NA	NA	T2D	Margin	0.738021	Methy	1.79627	Methy	2.13659	Methy	2.22426	Methy	2.04263	Methy	2.30772	Methy	1.40319	Margin	0.166099	Margin	0.292799	Margin	0.692937
cg09187338	7	130239048	NA	NA	NA	NA	T2D	Margin	0.37523	Margin	0.66688	Methy	1.44182	Margin	0.749675	Margin	0.345341	Methy	1.97973	Margin	-0.843509	Margin	0.0346933	Margin	0.277356	Margin	0.247413
cg04132407	7	130276916	NA	NA	NA	NA	T2D	Methy	1.4724	Methy	1.44445	Methy	1.16818	Margin	0.636217	Margin	0.935124	Methy	1.81158	Methy	1.46633	Methy	1.55743	Methy	1.53954	Methy	1.60783
cg09662496	7	130277014	NA	NA	NA	NA	T2D	Methy	1.91837	Methy	1.73125	Methy	1.51081	Margin	0.897092	Methy	1.00224	Methy	1.67674	Methy	2.10541	Methy	2.11949	Methy	1.91737	Methy	1.93121
cg15099666	7	130277099	NA	NA	NA	NA	T2D	Methy	0.992727	Methy	1.1313	Margin	0.732525	Margin	0.518517	Margin	0.722553	Methy	1.57935	Methy	1.18326	Methy	1.11039	Methy	1.17698	Methy	1.13215
cg14761417	7	130287400	FLJ43663;FLJ43663	NR_015431;NR_024153	Body;Body	NA	T2D	Methy	2.09179	Methy	1.78315	Methy	1.6525	Margin	0.715275	Methy	0.988148	Methy	2.78247	Methy	2.87159	Methy	2.43715	Methy	2.7276	Methy	3.08306
cg20228731	7	130296591	FLJ43663;FLJ43663	NR_015431;NR_024153	Body;Body	NA	T2D	Margin	0.23581	Margin	-0.619641	Unmethy	-2.26358	Unmethy	-3.22349	Unmethy	-1.98004	Margin	-1.47499	Methy	0.781633	Methy	0.704598	Margin	0.780786	Methy	1.00501
cg15928106	7	130296618	FLJ43663;FLJ43663	NR_015431;NR_024153	Body;Body	NA	T2D	Margin	-0.229905	Margin	-0.990894	Unmethy	-2.38145	Unmethy	-3.02375	Unmethy	-2.03971	Unmethy	-1.99522	Margin	0.270497	Margin	0.178781	Margin	0.313323	Margin	0.470232
cg00911776	7	130332779	FLJ43663;FLJ43663	NR_015431;NR_024153	Body;Body	NA	T2D	Methy	1.42801	Methy	1.45796	Margin	0.776423	Methy	2.35224	Methy	2.28654	Methy	2.31757	Methy	1.25802	Methy	1.185	Methy	1.27784	Methy	0.908489
cg10170504	7	130349192	FLJ43663;FLJ43663	NR_015431;NR_024153	Body;Body	NA	T2D	Methy	2.09054	Methy	2.11277	Methy	2.98919	Methy	1.9009	Margin	-0.00296537	Methy	1.80715	Methy	2.61334	Methy	2.67879	Methy	2.83271	Methy	2.96124
cg22544881	7	130362886	FLJ43663;FLJ43663	NR_015431;NR_024153	Body;Body	NA	T2D	Margin	-0.925669	Margin	-0.0864144	Margin	0.72865	Margin	0.820928	Margin	-0.0998609	Margin	0.246698	Unmethy	-3.00043	Unmethy	-2.85085	Unmethy	-3.00763	Unmethy	-3.18492
cg14343652	7	130439553	FLJ43663;FLJ43663	NR_015431;NR_024153	Body;Body	N_Shore	T2D	Margin	-1.74713	Margin	-0.965655	Margin	-0.0462482	Margin	-0.386065	Margin	-1.57031	Margin	-1.2277	Unmethy	-3.08802	Unmethy	-2.84305	Unmethy	-3.34276	Unmethy	-3.39746
cg05632420	7	130444272	MKLN1;FLJ43663	NM_001145354;NR_015431	TSS1500;TSS200	N_Shore	T2D	Margin	0.735661	Margin	0.231828	Margin	-0.32462	Margin	-1.44389	Unmethy	-2.03198	Margin	0.485061	Methy	1.31027	Methy	1.14608	Methy	1.06913	Methy	0.868411
cg15571405	7	130446707	MKLN1	NM_001145354	5'UTR	S_Shore	T2D	Unmethy	-2.39153	Margin	-1.60109	Margin	-1.5895	Margin	-0.488336	Margin	-0.732526	Unmethy	-3.66311	Unmethy	-4.29494	Unmethy	-3.88369	Unmethy	-3.88894	Unmethy	-4.26261
cg02771117	8	11316762	FAM167A;C8orf12	NM_053279;NR_026814	3'UTR;Body	NA	RA,SLE	Margin	-0.0152828	Margin	-0.441896	Margin	-0.136068	Margin	-1.05258	Unmethy	-2.66308	Unmethy	-2.00809	Margin	-0.488898	Margin	0.105044	Margin	0.382797	Margin	0.494318
cg16103604	8	11322322	C8orf12;FAM167A	NR_026814;NM_053279	Body;Body	NA	RA,SLE	Methy	1.20991	Margin	0.60215	Margin	-0.0993207	Margin	-0.0964986	Margin	0.80622	Methy	1.74109	Methy	1.46954	Methy	1.43298	Methy	1.25052	Methy	1.2822
cg03059247	8	11325067	C8orf12;FAM167A	NR_026814;NM_053279	Body;Body	NA	RA,SLE	Methy	1.07034	Methy	1.16021	Margin	0.72278	Methy	1.01214	Methy	1.60971	Methy	1.60181	Methy	0.93667	Methy	0.986342	Methy	1.13686	Methy	1.50597
cg26274995	8	11340393	FAM167A	NM_053279	5'UTR	NA	RA,SLE	Methy	1.93616	Methy	1.8724	Methy	1.70601	Methy	1.66452	Methy	1.80941	Margin	0.854103	Methy	2.27071	Methy	2.10806	Methy	2.23779	Methy	2.24481
cg06551905	8	11340449	FAM167A	NM_053279	5'UTR	NA	RA,SLE	Methy	2.09791	Methy	1.6483	Methy	1.15056	Methy	1.13663	Methy	1.82489	Margin	0.74556	Methy	2.64034	Methy	2.55384	Methy	2.56173	Methy	2.87207
cg08224773	8	11349278	FAM167A	NM_053279	5'UTR	NA	RA,SLE	Margin	0.83656	Margin	0.277154	Margin	-0.816543	Margin	-0.552709	Margin	0.609355	Margin	-0.299479	Methy	1.98724	Methy	1.75064	Methy	1.77103	Methy	1.73184
cg01383082	8	11360884	FAM167A	NM_053279	5'UTR	N_Shore	RA,SLE	Methy	0.977893	Methy	1.34535	Methy	1.95272	Methy	1.70526	Methy	1.44293	Margin	0.457505	Methy	0.731024	Methy	0.781414	Margin	0.690049	Margin	0.837701
cg03547562	8	11364424	NA	NA	NA	S_Shelf	RA,SLE	Margin	0.332425	Margin	0.256662	Margin	0.103404	Margin	0.0895689	Margin	0.284259	Margin	0.779261	Margin	0.255941	Margin	0.350041	Methy	1.34266	Margin	0.406979
cg09528494	8	11376085	NA	NA	NA	NA	RA,SLE	Methy	1.2452	Margin	0.863255	Margin	0.791703	Margin	0.450733	Margin	0.37311	Margin	0.319454	Methy	0.683473	Methy	1.74887	Methy	1.89566	Methy	1.78476
cg10147394	8	11387706	BLK	NM_001715	TSS1500	NA	RA,SLE	Methy	2.64948	Methy	2.2018	Methy	2.73614	Methy	2.41406	Methy	2.62262	Unmethy	-2.72097	Methy	3.01578	Methy	2.92079	Methy	2.99499	Methy	2.85016
cg15742700	8	11388262	BLK	NM_001715	TSS1500	NA	RA,SLE	Methy	2.21232	Methy	1.10313	Methy	2.66354	Methy	3.31333	Methy	2.31442	Unmethy	-3.06658	Margin	-1.53906	Methy	3.27526	Methy	3.23246	Methy	3.1565
cg13440894	8	11388544	BLK	NM_001715	TSS1500	NA	RA,SLE	Methy	1.00963	Margin	0.558649	Methy	1.737	Methy	1.86473	Methy	1.07873	Unmethy	-3.09712	Margin	-1.31474	Methy	1.43095	Methy	1.4253	Methy	1.36809
cg22826986	8	11388916	BLK	NM_001715	TSS200	NA	RA,SLE	Methy	2.23864	Methy	2.06228	Methy	2.55966	Methy	1.96369	Methy	1.79944	Unmethy	-3.07967	Methy	2.78455	Methy	2.59182	Methy	2.70017	Methy	2.67566
cg03860768	8	11388980	BLK;BLK	NM_001715;NM_001715	5'UTR;1stExon	NA	RA,SLE	Methy	2.45572	Methy	2.15668	Methy	2.69049	Methy	2.42122	Methy	2.14355	Unmethy	-2.99664	Methy	3.02793	Methy	2.78854	Methy	2.70264	Methy	2.55565
cg19882315	8	11389255	BLK;BLK	NM_001715;NM_001715	5'UTR;1stExon	NA	RA,SLE	Methy	1.82216	Methy	1.49622	Methy	1.87317	Methy	1.40258	Methy	1.54326	Unmethy	-2.93018	Methy	2.2902	Methy	2.10381	Methy	2.26757	Methy	2.26705
cg04441667	8	11394012	BLK	NM_001715	5'UTR	NA	RA,SLE	Margin	0.508165	Margin	0.17193	Margin	-0.371885	Margin	-0.45582	Margin	-0.170023	Margin	-0.357998	Methy	0.682395	Methy	0.699478	Methy	1.04567	Methy	1.12883
cg26161004	8	11450595	BLK	NM_001715	Body	NA	RA,SLE	Margin	0.406355	Margin	0.465762	Margin	0.749334	Methy	1.21033	Methy	1.10828	Margin	0.455877	Margin	-0.814826	Margin	0.333196	Margin	0.309502	Margin	0.448179
cg14702231	8	11450643	BLK	NM_001715	Body	NA	RA,SLE	Margin	0.686669	Margin	0.569666	Margin	0.717762	Methy	1.11215	Methy	1.35948	Margin	0.856849	Margin	-0.381935	Methy	0.744043	Margin	0.742669	Margin	0.857293
cg16861076	8	11459003	BLK	NM_001715	Body	Island	RA,SLE	Unmethy	-3.02681	Unmethy	-2.74997	Unmethy	-4.44577	Unmethy	-3.62189	Unmethy	-4.13682	Margin	-0.742683	Unmethy	-4.31898	Unmethy	-4.61845	Unmethy	-4.73908	Unmethy	-5.05432
cg23808421	8	11459842	NA	NA	NA	Island	RA,SLE	Unmethy	-2.86913	Unmethy	-2.48125	Unmethy	-2.70098	Unmethy	-2.59928	Unmethy	-2.59945	Margin	-1.27188	Unmethy	-3.27961	Unmethy	-3.151	Unmethy	-3.28294	Unmethy	-3.22583
cg12840336	8	11460139	NA	NA	NA	S_Shore	RA,SLE	Unmethy	-2.48988	Unmethy	-2.44796	Unmethy	-2.76949	Unmethy	-3.14546	Unmethy	-2.33213	Margin	-1.58155	Unmethy	-2.18777	Unmethy	-2.41043	Unmethy	-2.42395	Unmethy	-2.4708
cg01824466	8	96028707	TP53INP1;TP53INP1	NM_001135733;NM_033285	5'UTR;5'UTR	N_Shore	T2D	Margin	-0.166328	Margin	-0.713415	Unmethy	-2.11998	Margin	-1.14428	Margin	-0.0444857	Unmethy	-2.20762	Margin	-0.095339	Margin	0.170897	Margin	-0.0359172	Margin	-1.21593
cg26343298	8	96029928	TP53INP1;TP53INP1	NM_001135733;NM_033285	5'UTR;5'UTR	Island	T2D	Unmethy	-2.7506	Unmethy	-2.37433	Unmethy	-2.58964	Margin	-1.63721	Unmethy	-2.19981	Unmethy	-3.52481	Unmethy	-3.50167	Unmethy	-3.32501	Unmethy	-3.53171	Unmethy	-3.61044
cg16049864	8	96031260	TP53INP1;TP53INP1	NM_033285;NM_001135733	TSS1500;TSS1500	Island	T2D	Unmethy	-2.00015	Unmethy	-1.77941	Margin	-1.5415	Margin	-1.39402	Margin	-1.74722	Unmethy	-2.89781	Unmethy	-2.29206	Unmethy	-2.25294	Unmethy	-2.34585	Unmethy	-2.81896
cg09323728	8	96031528	TP53INP1;TP53INP1	NM_033285;NM_001135733	TSS1500;TSS1500	Island	T2D	Margin	0.437694	Margin	0.665828	Margin	0.857237	Methy	0.950475	Margin	0.63438	Margin	-0.0103185	Margin	0.419689	Margin	0.210734	Margin	0.382035	Margin	-0.180308
cg18059933	8	96031639	TP53INP1;TP53INP1	NM_033285;NM_001135733	TSS1500;TSS1500	S_Shore	T2D	Margin	0.127476	Margin	0.365601	Margin	0.969348	Methy	1.12131	Margin	0.153627	Margin	-1.33882	Margin	-0.537894	Margin	-0.245875	Margin	-0.0992567	Margin	-0.690711
cg08870893	8	118019020	C8orf85	NM_001025357	TSS1500	N_Shore	Asthma	Methy	1.07106	Margin	0.821192	Margin	0.585617	Margin	0.0111272	Margin	-0.0214764	Margin	0.373219	Methy	1.37627	Methy	1.10797	Methy	1.31066	Methy	1.10595
cg21092790	8	118019425	C8orf85	NM_001025357	TSS1500	N_Shore	Asthma	Unmethy	-1.98282	Margin	-1.71584	Margin	-1.64573	Margin	-1.35105	Margin	-1.42582	Margin	-1.36238	Unmethy	-2.54975	Unmethy	-2.33446	Unmethy	-2.44999	Unmethy	-2.3397
cg07064711	8	118019516	C8orf85	NM_001025357	TSS200	N_Shore	Asthma	Margin	-1.32865	Margin	-1.04066	Margin	-1.08837	Margin	-0.891236	Margin	-0.786779	Margin	-0.982543	Margin	-1.61522	Margin	-1.56753	Margin	-1.47021	Unmethy	-1.69908
cg04271218	8	118019685	C8orf85	NM_001025357	1stExon	Island	Asthma	Unmethy	-1.98426	Unmethy	-1.8901	Unmethy	-1.88397	Margin	-1.71942	Margin	-1.61603	Margin	-1.73068	Unmethy	-2.30262	Unmethy	-2.2166	Unmethy	-2.25051	Unmethy	-2.28502
cg23338195	8	118215599	SLC30A8	NM_173851	TSS1500	NA	Asthma,T2D	Methy	1.88241	Methy	1.65698	Methy	1.38759	Margin	0.844459	Methy	0.986928	Methy	1.38205	Methy	1.9705	Methy	2.04791	Methy	2.0511	Methy	2.06135
cg14340481	9	3818562	GLIS3;GLIS3	NM_152629;NM_001042413	Body;Body	NA	T1D	Methy	1.55783	Methy	1.42262	Methy	1.32983	Margin	0.901811	Margin	0.814768	Methy	1.43494	Methy	1.71153	Methy	1.65833	Methy	1.86549	Methy	1.80298
cg14269813	9	3889055	GLIS3;GLIS3;C9orf70	NM_152629;NM_001042413;NR_026663	Body;Body;Body	NA	T1D	Methy	1.50435	Methy	1.78734	Methy	1.67602	Methy	1.23599	Methy	1.37832	Methy	1.61262	Methy	2.19853	Methy	1.59053	Methy	0.995708	Margin	-0.232555
cg14047387	9	4070919	GLIS3;GLIS3	NM_152629;NM_001042413	Body;Body	NA	T1D	Methy	1.66154	Methy	1.15251	Margin	0.751946	Margin	0.24024	Margin	0.398188	Margin	0.482352	Methy	1.94177	Methy	2.0107	Methy	2.30901	Methy	2.37158
cg14641122	9	4073904	GLIS3;GLIS3	NM_152629;NM_001042413	Body;Body	NA	T1D	Methy	1.75918	Methy	1.98055	Methy	2.27931	Methy	1.93055	Margin	0.977116	Methy	2.37085	Methy	1.98847	Methy	1.39784	Methy	1.3867	Methy	1.31116
cg14302428	9	4129392	GLIS3;GLIS3	NM_001042413;NM_152629	Body;5'UTR	NA	T1D	Methy	2.40699	Methy	2.01582	Methy	1.60087	Margin	0.667385	Margin	0.81582	Methy	1.26158	Methy	3.16794	Methy	3.0137	Methy	2.79265	Methy	1.8204
cg10836809	9	4290203	GLIS3	NM_001042413	TSS200	S_Shore	T1D	Margin	-1.31768	Margin	-0.707183	Margin	0.0646668	Margin	-0.22076	Margin	-1.16639	Margin	-1.58942	Unmethy	-2.68649	Unmethy	-2.49148	Unmethy	-2.79542	Unmethy	-2.66291
cg23053961	9	4290432	GLIS3	NM_001042413	TSS1500	S_Shore	T1D	Methy	1.30754	Methy	1.67057	Methy	2.13975	Methy	2.27416	Methy	1.8406	Methy	1.59192	Methy	0.986817	Methy	0.852417	Methy	0.91213	Margin	0.84037
cg08719869	9	8847486	PTPRD;PTPRD	NM_002839;NM_130391	5'UTR;5'UTR	Island	T2D	Unmethy	-2.62737	Unmethy	-2.4273	Unmethy	-2.69724	Margin	-1.87996	Margin	-1.8191	Unmethy	-1.8309	Unmethy	-3.12949	Unmethy	-3.05866	Unmethy	-3.17954	Unmethy	-3.1649
cg09371281	9	8848574	PTPRD;PTPRD	NM_002839;NM_130391	5'UTR;5'UTR	Island	T2D	Margin	-1.0842	Margin	-0.590027	Margin	-0.2229	Margin	0.0485633	Margin	-0.331995	Margin	-0.729046	Margin	-1.77731	Margin	-1.90404	Unmethy	-1.54762	Unmethy	-2.00213
cg14458619	9	8848644	PTPRD;PTPRD	NM_002839;NM_130391	5'UTR;5'UTR	Island	T2D	Margin	-0.905658	Margin	-0.501783	Margin	0.0287875	Margin	0.495356	Margin	0.0339102	Margin	-0.327033	Margin	-1.37982	Margin	-1.47713	Margin	-1.31964	Unmethy	-1.64068
cg14406814	9	10222876	PTPRD;PTPRD	NM_002839;NM_130391	5'UTR;5'UTR	NA	T2D	Methy	1.38007	Methy	1.24049	Methy	1.24225	Margin	0.822755	Margin	0.808767	Methy	1.40658	Methy	1.40167	Methy	1.18904	Methy	1.26737	Methy	1.06834
cg13441730	9	10603328	PTPRD;PTPRD	NM_130391;NM_002839	TSS1500;TSS1500	Island	T2D	Unmethy	-3.26002	Unmethy	-2.90263	Unmethy	-3.19407	Margin	-1.67398	Margin	-1.83759	Unmethy	-2.01947	Unmethy	-4.11151	Unmethy	-4.02398	Unmethy	-4.13507	Unmethy	-4.68631
cg04026675	9	21964514	CDKN2A;CDKN2A;CDKN2A	NM_058197;NM_058195;NM_000077	1stExon;Body;Body	N_Shore	T2D	Unmethy	-2.18702	Unmethy	-1.95804	Unmethy	-1.96957	Margin	-1.9271	Unmethy	-2.03877	Margin	-1.78004	Unmethy	-2.4221	Unmethy	-2.49022	Unmethy	-2.4523	Unmethy	-2.45717
cg07562918	9	21984435	CDKN2A;CDKN2BAS	NM_058195;NR_003529	1stExon;TSS1500	Island	T2D	Unmethy	-2.09425	Unmethy	-1.91572	Unmethy	-1.9801	Margin	-2.05673	Margin	-1.78076	Unmethy	-1.90975	Unmethy	-2.01436	Unmethy	-1.96501	Unmethy	-1.77325	Unmethy	-1.78758
cg14069088	9	21986207	CDKN2BAS	NR_003529	Body	S_Shore	T2D	Margin	-1.81899	Margin	-0.656507	Margin	0.563869	Margin	0.843528	Margin	0.106723	Unmethy	-1.96156	Unmethy	-3.52527	Unmethy	-2.91395	Unmethy	-3.20226	Unmethy	-3.50713
cg19481686	9	21995288	CDKN2BAS;CDKN2B;CDKN2B	NR_003529;NM_078487;NM_004936	Body;3'UTR;3'UTR	N_Shore	T2D	Unmethy	-2.21311	Margin	-1.66552	Unmethy	-1.8058	Margin	-1.05336	Margin	-1.12615	Margin	-1.7743	Unmethy	-2.85256	Unmethy	-2.74326	Unmethy	-3.08313	Unmethy	-2.92722
cg08390209	9	21995563	CDKN2BAS;CDKN2B;CDKN2B	NR_003529;NM_078487;NM_004936	Body;3'UTR;3'UTR	N_Shore	T2D	Unmethy	-2.09427	Margin	-1.723	Unmethy	-1.80488	Margin	-1.15111	Margin	-1.01743	Unmethy	-1.81705	Unmethy	-2.56281	Unmethy	-2.45292	Unmethy	-2.50161	Unmethy	-2.69938
cg13926295	9	21999595	CDKN2B;CDKN2BAS;CDKN2B	NM_004936;NR_003529;NM_078487	TSS1500;Body;TSS1500	S_Shore	T2D	Unmethy	-2.0052	Unmethy	-1.94258	Unmethy	-1.7882	Margin	-1.89846	Margin	-1.74567	Unmethy	-2.36478	Unmethy	-2.20996	Unmethy	-2.24003	Unmethy	-2.19304	Unmethy	-2.1508
cg14338345	9	22437679	DMRTA1	NM_022160	1stExon	Island	T2D	Margin	-1.4424	Margin	-1.13437	Margin	-0.806632	Margin	-0.801443	Margin	-1.11563	Margin	-1.2053	Margin	-1.75516	Margin	-1.82131	Unmethy	-1.80995	Unmethy	-1.89615
cg17909890	9	22437694	DMRTA1	NM_022160	1stExon	Island	T2D	Unmethy	-2.7639	Unmethy	-2.3627	Unmethy	-2.22426	Margin	-1.8625	Unmethy	-2.32416	Unmethy	-1.86062	Unmethy	-3.40497	Unmethy	-3.47377	Unmethy	-3.27233	Unmethy	-3.58152
cg27443224	9	34700135	CCL21;CCL21	NM_002989;NM_002989	1stExon;5'UTR	NA	RA	Methy	1.55014	Methy	1.10171	Methy	1.81441	Methy	1.87707	Methy	1.49785	Margin	1.07049	Margin	-1.26437	Methy	1.77775	Methy	1.81959	Methy	1.98055
cg13825112	9	34716950	C9orf144B	NM_001141917	Body	NA	RA	Methy	1.28706	Methy	1.13736	Methy	1.1803	Margin	0.782526	Margin	0.944049	Margin	1.10425	Methy	0.937629	Methy	1.14735	Methy	1.05699	Methy	1.00943
cg13740933	9	34799637	NA	NA	NA	Island	RA	Margin	-1.87729	Margin	-1.29975	Margin	-0.964149	Margin	-1.03206	Margin	-1.24057	Margin	-1.368	Unmethy	-2.49239	Unmethy	-2.47144	Unmethy	-2.35661	Unmethy	-2.43271
cg13482814	9	81373152	NA	NA	NA	N_Shelf	AsthmaChidhood	Methy	3.2025	Methy	3.47835	Methy	3.96127	Methy	4.18023	Methy	3.85302	Methy	2.95756	Methy	2.69713	Methy	2.71333	Methy	1.58574	Margin	-1.21869
cg14184866	9	81374957	NA	NA	NA	N_Shore	AsthmaChidhood	Margin	0.449695	Margin	0.767426	Methy	1.36021	Methy	1.62966	Methy	1.09826	Margin	-0.35257	Margin	-0.644448	Margin	-0.528019	Margin	-0.510667	Margin	-0.472277
cg11809085	9	116607577	TNFSF15	NM_005118	Body	NA	IBD	Methy	2.01229	Methy	2.64392	Methy	3.47139	Methy	3.08691	Methy	3.00421	Methy	3.22932	Methy	1.48787	Methy	1.55362	Methy	1.37993	Margin	-0.906119
cg14113958	9	116697058	NA	NA	NA	NA	IBD	Methy	1.23791	Margin	0.807993	Methy	1.38178	Methy	1.28746	Methy	1.05524	Methy	1.37175	Margin	-1.46126	Methy	1.25852	Methy	1.54058	Methy	2.86032
cg14614490	9	122677637	PHF19;PHF19	NM_001009936;NM_015651	5'UTR;5'UTR	N_Shore	RA	Methy	1.01139	Methy	1.08472	Margin	0.441613	Margin	0.668539	Margin	0.972861	Methy	1.92977	Methy	1.48192	Methy	1.27556	Methy	1.36625	Methy	1.45514
cg02388253	9	122680184	PHF19;PHF19	NM_001009936;NM_015651	TSS1500;TSS1500	S_Shore	RA	Margin	-1.46931	Margin	-1.19302	Margin	-1.23941	Margin	-0.952331	Margin	-0.530042	Margin	-0.507805	Margin	-1.35224	Margin	-1.74048	Unmethy	-1.8422	Unmethy	-2.45536
cg13501527	9	122680295	PHF19;PHF19	NM_001009936;NM_015651	TSS1500;TSS1500	S_Shore	RA	Margin	0.643261	Margin	0.686636	Margin	0.185225	Margin	0.331412	Margin	0.788743	Margin	0.620995	Methy	0.808676	Margin	0.56728	Margin	0.470137	Margin	-0.0534039
cg04236137	9	122695708	NA	NA	NA	N_Shore	RA	Methy	1.154	Margin	0.50692	Margin	-0.316976	Margin	0.112025	Margin	0.967525	Margin	-1.35383	Methy	2.15307	Methy	2.16988	Methy	2.18342	Methy	2.0489
cg14392772	9	122706302	TRAF1	NM_005658	3'UTR	NA	RA	Margin	-0.806779	Margin	-1.34771	Unmethy	-2.90916	Unmethy	-3.78782	Unmethy	-2.52749	Unmethy	-3.38611	Margin	0.109875	Margin	-0.310307	Margin	-0.168083	Margin	-0.173593
cg14518276	9	122727091	TRAF1	NM_005658	Body	N_Shelf	RA	Methy	0.931028	Margin	0.307069	Margin	-0.268968	Margin	-1.01477	Margin	-1.39281	Margin	1.09346	Methy	2.3098	Methy	2.08485	Methy	2.35449	Methy	2.58536
cg15551881	9	122728536	TRAF1	NM_005658	5'UTR	N_Shelf	RA	Margin	-1.24986	Margin	-0.179655	Margin	-0.943395	Unmethy	-2.68429	Margin	-0.985991	Margin	0.295324	Methy	0.99362	Margin	-1.80264	Unmethy	-1.66153	Margin	-1.21256
cg14064762	9	122728566	TRAF1	NM_005658	5'UTR	N_Shelf	RA	Unmethy	-2.26025	Margin	-1.48261	Unmethy	-2.00129	Unmethy	-2.9877	Unmethy	-1.92506	Margin	-0.545824	Margin	-1.47746	Unmethy	-3.05258	Unmethy	-2.66386	Unmethy	-2.50021
cg04517263	9	122729014	TRAF1	NM_005658	TSS200	N_Shore	RA	Unmethy	-2.19765	Margin	-1.1615	Unmethy	-2.40093	Unmethy	-3.70912	Margin	-1.46905	Margin	-0.396229	Margin	-0.153891	Unmethy	-3.67692	Unmethy	-2.09576	Margin	-0.0685199
cg21152671	9	122730407	TRAF1	NM_005658	TSS1500	N_Shore	RA	Margin	-1.30251	Margin	-1.46033	Unmethy	-3.04456	Unmethy	-3.48943	Margin	-1.488	Margin	-1.39765	Margin	-0.366668	Margin	-0.807679	Margin	-0.835784	Margin	-0.749707
cg21241889	9	122730479	TRAF1	NM_005658	TSS1500	N_Shore	RA	Margin	-0.515811	Margin	-0.767685	Unmethy	-1.98485	Unmethy	-2.4484	Margin	-0.697999	Margin	-0.763451	Margin	-0.162306	Margin	-0.376947	Margin	-0.306265	Margin	-0.0833184
cg21161526	9	122731493	NA	NA	NA	Island	RA	Margin	-1.01084	Margin	-1.16104	Margin	-1.43952	Unmethy	-2.12072	Margin	-1.5827	Margin	-1.03799	Margin	-0.749055	Margin	-0.897082	Margin	-0.867214	Margin	-0.987832
cg04665046	9	122731495	NA	NA	NA	Island	RA	Unmethy	-2.02511	Unmethy	-2.1843	Unmethy	-2.55532	Unmethy	-3.29755	Unmethy	-2.64375	Unmethy	-2.22326	Margin	-1.68394	Unmethy	-2.02552	Unmethy	-1.91723	Unmethy	-2.10371
cg14368473	9	122734538	NA	NA	NA	S_Shelf	RA	Methy	2.53678	Methy	1.98072	Methy	1.89934	Methy	1.14692	Methy	1.54809	Margin	1.13649	Methy	2.97618	Methy	2.82081	Methy	2.95178	Methy	3.0237
cg01944288	9	134026038	NTNG2	NM_032536	TSS1500	N_Shore	SLE	Margin	-0.824201	Margin	0.347182	Margin	0.772582	Methy	1.43377	Methy	1.46577	Margin	1.00317	Margin	-1.28326	Unmethy	-2.93539	Unmethy	-3.20678	Unmethy	-2.63476
cg21224977	9	134027164	NTNG2;NTNG2	NM_032536;NM_032536	1stExon;5'UTR	Island	SLE	Unmethy	-1.92406	Unmethy	-2.12344	Unmethy	-2.06359	Margin	-1.89433	Unmethy	-1.97901	Unmethy	-1.9705	Margin	-1.81899	Unmethy	-2.05022	Unmethy	-2.07582	Unmethy	-2.04497
cg13783653	9	134029657	NTNG2	NM_032536	5'UTR	Island	SLE	Unmethy	-2.08441	Unmethy	-2.17782	Unmethy	-2.41256	Margin	-1.74624	Unmethy	-1.92027	Unmethy	-2.30942	Unmethy	-2.61898	Unmethy	-2.18891	Unmethy	-2.17519	Unmethy	-2.24859
cg09359064	9	134029714	NTNG2	NM_032536	5'UTR	Island	SLE	Margin	-1.56002	Margin	-1.6139	Margin	-1.57496	Margin	-1.1157	Margin	-1.21553	Margin	-1.70913	Unmethy	-2.12265	Margin	-1.81265	Unmethy	-1.65142	Unmethy	-1.72815
cg13409439	9	134030117	NTNG2	NM_032536	5'UTR	S_Shore	SLE	Methy	2.17411	Methy	1.66517	Methy	1.8205	Methy	2.52077	Methy	2.05296	Margin	0.759387	Methy	0.952683	Methy	2.26226	Methy	2.31784	Methy	1.74742
cg03653026	9	134104939	NTNG2	NM_032536	Body	N_Shore	SLE	Unmethy	-2.94056	Unmethy	-2.22394	Unmethy	-1.97434	Margin	-1.97784	Unmethy	-2.14636	Unmethy	-2.24673	Unmethy	-3.82314	Unmethy	-3.58301	Unmethy	-3.6487	Unmethy	-3.88688
cg26316423	10	6144143	IL2RA;IL2RA	NM_000417;NM_000417	1stExon;5'UTR	NA	RA,T1D	Margin	0.717465	Margin	0.238235	Margin	-0.383436	Margin	-0.488666	Margin	-0.418813	Margin	0.027749	Methy	1.71116	Methy	1.49617	Methy	1.59084	Methy	1.66161
cg16949914	10	6144521	IL2RA	NM_000417	TSS200	NA	RA,T1D	Unmethy	-1.94642	Unmethy	-2.42217	Unmethy	-3.40813	Unmethy	-3.59225	Unmethy	-2.68007	Unmethy	-1.98982	Margin	-1.73351	Margin	-1.70028	Unmethy	-1.6609	Unmethy	-2.16931
cg26105232	10	6145662	IL2RA	NM_000417	TSS1500	NA	RA,T1D	Margin	-0.301822	Margin	0.920221	Methy	2.15607	Methy	2.5917	Methy	2.04005	Methy	1.23704	Margin	-1.36631	Margin	-1.76883	Unmethy	-1.78327	Unmethy	-2.30722
cg13914486	10	6157330	NA	NA	NA	NA	RA,T1D	Methy	3.31943	Methy	4.40648	Methy	4.1568	Methy	4.19934	Methy	4.58251	Methy	5.0545	Methy	4.21289	Methy	1.92964	Methy	0.907037	Unmethy	-3.03859
cg25529535	10	6165721	NA	NA	NA	NA	RA,T1D	Methy	1.003	Margin	0.494045	Margin	-1.61888	Margin	-0.435646	Margin	0.016136	Methy	1.95322	Methy	1.92085	Methy	1.4246	Methy	1.20239	Margin	-0.479984
cg06937939	10	6168608	NA	NA	NA	N_Shelf	T1D	Unmethy	-2.20603	Unmethy	-2.11011	Unmethy	-2.31693	Unmethy	-2.202	Margin	-1.9023	Unmethy	-1.96832	Unmethy	-2.12061	Unmethy	-2.33311	Unmethy	-2.33399	Unmethy	-2.79733
cg00242839	10	6170584	RBM17;RBM17	NM_032905;NM_001145547	TSS1500;TSS1500	N_Shore	T1D	Methy	1.08171	Methy	1.20133	Methy	1.19754	Methy	1.31513	Methy	1.36528	Margin	0.911133	Methy	0.91573	Methy	0.984714	Methy	0.924811	Methy	0.872593
cg15953921	10	6170586	RBM17;RBM17	NM_032905;NM_001145547	TSS1500;TSS1500	N_Shore	T1D	Margin	0.700248	Margin	0.818577	Margin	0.766156	Margin	0.895525	Margin	0.822959	Margin	0.521475	Methy	0.682919	Margin	0.610834	Margin	0.665701	Margin	0.701907
cg14899522	10	6512756	PRKCQ	NM_006257	Body	NA	T1D,SLE	Methy	5.82884	Unmethy	6.26519	Unmethy	6.16448	Unmethy	6.08602	Unmethy	6.13632	Methy	6.00257	Methy	6.32761	Methy	5.80649	Methy	5.83011	Methy	6.08622
cg23434428	10	6597135	PRKCQ	NM_006257	5'UTR	NA	T1D,SLE	Methy	1.25118	Methy	2.29031	Methy	3.49454	Methy	3.98205	Methy	3.57103	Methy	2.47108	Methy	0.715632	Margin	0.45382	Margin	0.0677459	Unmethy	-1.63867
cg09877009	10	6645139	PRKCQ	NM_006257	5'UTR	NA	T1D,SLE	Unmethy	-2.33974	Unmethy	-1.73931	Margin	-1.56779	Margin	-1.52281	Margin	-1.89437	Margin	-0.848052	Unmethy	-2.42314	Unmethy	-2.79536	Unmethy	-2.47823	Unmethy	-2.9401
cg26818464	10	6658729	PRKCQ	NM_006257	5'UTR	N_Shelf	T1D,SLE	Methy	1.21147	Margin	0.386973	Margin	-1.63718	Unmethy	-2.11097	Margin	-1.00779	Methy	1.90475	Methy	2.0299	Methy	1.90683	Methy	1.94103	Methy	2.02666
cg01389728	10	6660578	PRKCQ	NM_006257	5'UTR	N_Shore	T1D,SLE	Margin	-1.37632	Margin	-1.55217	Unmethy	-2.55497	Unmethy	-2.9961	Unmethy	-2.2428	Margin	-1.32177	Margin	-0.881609	Margin	-1.05528	Margin	-0.956137	Margin	-1.21703
cg00110545	10	6665495	NA	NA	NA	S_Shelf	T1D,SLE	Margin	-0.426275	Margin	-0.68312	Unmethy	-2.3645	Unmethy	-3.6089	Unmethy	-2.11239	Margin	0.372498	Methy	0.972373	Margin	-0.129087	Margin	0.193623	Methy	0.881758
cg13430851	10	12277043	CDC123;NUDT5	NM_006023;NM_014142	TSS1500;5'UTR	N_Shore	T2D	Unmethy	-2.00832	Unmethy	-2.03729	Unmethy	-2.03934	Unmethy	-2.09821	Margin	-1.78613	Unmethy	-1.80091	Unmethy	-2.23721	Unmethy	-2.28396	Unmethy	-1.96499	Unmethy	-2.05954
cg19576422	10	12296349	CDC123	NM_006023	Body	NA	T2D	Methy	1.31181	Methy	2.11143	Methy	2.89117	Methy	2.79957	Methy	2.55659	Methy	2.41957	Methy	1.48132	Methy	0.816938	Margin	0.85063	Methy	1.12594
cg14537549	10	12433191	CAMK1D;CAMK1D	NM_020397;NM_153498	Body;Body	S_Shore	T2D	Margin	-1.23945	Margin	-1.2184	Margin	-0.561577	Margin	-0.879954	Margin	-0.951177	Margin	-1.35368	Margin	-1.57701	Margin	-1.6537	Unmethy	-1.54977	Unmethy	-1.62699
cg19501502	10	12441464	CAMK1D;CAMK1D	NM_020397;NM_153498	Body;Body	NA	T2D	Methy	1.8882	Methy	1.40998	Margin	0.867787	Margin	-0.0411104	Margin	-0.0523057	Methy	2.88719	Methy	2.80923	Methy	2.51371	Methy	2.63616	Methy	1.84567
cg10476206	10	12583450	CAMK1D;CAMK1D	NM_020397;NM_153498	Body;Body	NA	T2D	Methy	1.51444	Methy	2.59557	Methy	2.70462	Methy	2.87956	Methy	3.03808	Methy	2.94925	Methy	2.22194	Methy	1.19702	Methy	1.38321	Margin	0.711786
cg07639982	10	12595085	CAMK1D;CAMK1D	NM_020397;NM_153498	Body;Body	NA	T2D	Methy	2.03534	Methy	2.61665	Methy	2.99385	Methy	3.01673	Methy	3.22988	Methy	2.86483	Methy	1.96156	Methy	1.46428	Methy	1.14044	Margin	-0.0791959
cg26231267	10	12688038	CAMK1D;CAMK1D	NM_020397;NM_153498	Body;Body	NA	T2D	Unmethy	-2.49378	Unmethy	-2.17251	Unmethy	-2.72591	Margin	-1.61747	Margin	-1.02441	Unmethy	-2.78569	Unmethy	-2.93387	Unmethy	-3.10269	Unmethy	-2.81555	Unmethy	-1.98405
cg00115178	10	12688182	CAMK1D;CAMK1D	NM_020397;NM_153498	Body;Body	NA	T2D	Unmethy	-3.46008	Unmethy	-2.6942	Unmethy	-3.59047	Unmethy	-2.09346	Margin	-1.83029	Unmethy	-3.3973	Unmethy	-3.86176	Unmethy	-3.98246	Unmethy	-3.47098	Unmethy	-2.2952
cg26169081	10	12688344	CAMK1D;CAMK1D	NM_020397;NM_153498	Body;Body	NA	T2D	Margin	-0.485523	Margin	-0.464128	Margin	-1.49448	Margin	-0.62373	Margin	0.294908	Unmethy	-3.06283	Margin	0.0295882	Margin	-0.596365	Margin	-0.212614	Margin	0.542853
cg09958065	10	12688532	CAMK1D;CAMK1D	NM_020397;NM_153498	Body;Body	NA	T2D	Margin	-1.14393	Margin	0.0658683	Margin	-0.172033	Margin	0.624301	Methy	1.50988	Margin	-0.227773	Margin	-0.6044	Unmethy	-2.32965	Margin	-1.43331	Margin	0.549257
cg04947949	10	49562209	WDFY4	NM_020945	TSS1500	NA	SLE	Methy	3.25279	Methy	3.22847	Methy	3.27686	Methy	3.44404	Methy	3.40599	Margin	-1.55157	Methy	3.68227	Methy	3.22471	Methy	3.56868	Methy	3.47912
cg22835851	10	49562308	WDFY4	NM_020945	TSS1500	NA	SLE	Methy	2.03949	Methy	1.79035	Methy	1.94772	Methy	1.39049	Methy	1.25917	Margin	-0.335746	Methy	2.43675	Methy	2.48898	Methy	2.67619	Methy	2.67848
cg00404025	10	49562747	WDFY4	NM_020945	TSS1500	NA	SLE	Margin	-1.08655	Margin	-0.424046	Margin	0.0519161	Margin	0.310093	Margin	0.0225727	Unmethy	-2.76995	Unmethy	-2.60541	Unmethy	-2.16288	Unmethy	-2.30462	Unmethy	-2.36328
cg18768238	10	49562835	WDFY4	NM_020945	TSS1500	NA	SLE	Margin	-1.4523	Margin	-0.97779	Margin	-0.713462	Margin	-0.32971	Margin	-0.618716	Unmethy	-3.14513	Unmethy	-3.13673	Unmethy	-2.78399	Unmethy	-3.27366	Unmethy	-3.41077
cg10887366	10	49562867	WDFY4	NM_020945	TSS1500	NA	SLE	Margin	-1.74388	Margin	-1.63648	Margin	-1.45903	Margin	-0.77041	Margin	-0.961655	Unmethy	-2.55699	Unmethy	-2.33325	Unmethy	-2.46369	Unmethy	-2.61063	Unmethy	-2.63217
cg17526462	10	49562933	WDFY4	NM_020945	TSS1500	NA	SLE	Margin	-1.76363	Margin	-1.21698	Margin	-0.731337	Margin	-0.43464	Margin	-0.666914	Unmethy	-4.12867	Unmethy	-3.72609	Unmethy	-3.32824	Unmethy	-3.84739	Unmethy	-4.08919
cg15164194	10	49562936	WDFY4	NM_020945	TSS1500	NA	SLE	Margin	-0.909758	Margin	-0.219174	Margin	0.335918	Margin	0.542898	Margin	0.280947	Unmethy	-3.20716	Unmethy	-3.15719	Unmethy	-2.45666	Unmethy	-3.15236	Unmethy	-3.34137
cg27459529	10	49562949	WDFY4	NM_020945	TSS1500	NA	SLE	Margin	-1.13024	Margin	-0.565182	Margin	-0.102034	Margin	0.029998	Margin	-0.2395	Unmethy	-3.53657	Unmethy	-3.48793	Unmethy	-2.74379	Unmethy	-3.51322	Unmethy	-3.84245
cg20504007	10	49562960	WDFY4	NM_020945	TSS1500	NA	SLE	Unmethy	-2.21737	Unmethy	-1.80482	Margin	-1.45951	Margin	-1.18277	Margin	-1.24423	Unmethy	-3.29409	Unmethy	-3.35937	Unmethy	-3.03844	Unmethy	-3.35824	Unmethy	-3.18079
cg26246740	10	49563032	WDFY4	NM_020945	TSS1500	NA	SLE	Margin	-0.873707	Margin	-0.375559	Margin	-0.227332	Margin	-0.0276515	Margin	0.106512	Unmethy	-2.851	Unmethy	-2.71132	Unmethy	-2.05647	Unmethy	-2.72878	Unmethy	-2.85725
cg12024826	10	49563342	WDFY4	NM_020945	TSS200	NA	SLE	Unmethy	-2.77058	Unmethy	-2.22369	Unmethy	-1.67226	Margin	-1.60751	Margin	-1.79144	Unmethy	-3.59597	Unmethy	-3.58183	Unmethy	-3.37578	Unmethy	-3.33657	Unmethy	-3.1896
cg04749316	10	49563352	WDFY4	NM_020945	TSS200	NA	SLE	Margin	-0.596418	Margin	0.168794	Margin	0.607339	Margin	0.911204	Margin	0.877688	Unmethy	-2.33389	Unmethy	-2.50028	Margin	-1.86118	Unmethy	-2.25744	Unmethy	-2.22037
cg20434666	10	49563412	WDFY4	NM_020945	TSS200	NA	SLE	Unmethy	-2.74563	Unmethy	-2.31877	Margin	-1.48774	Margin	-1.21433	Margin	-1.48643	Unmethy	-3.94742	Unmethy	-3.49461	Unmethy	-3.46344	Unmethy	-3.52812	Unmethy	-3.59719
cg26437842	10	49563429	WDFY4	NM_020945	TSS200	NA	SLE	Unmethy	-2.36751	Margin	-1.60515	Margin	-1.20453	Margin	-1.00068	Margin	-0.879237	Unmethy	-3.91791	Unmethy	-3.99252	Unmethy	-3.38065	Unmethy	-3.45975	Unmethy	-3.28558
cg17967780	10	49563451	WDFY4	NM_020945	TSS200	NA	SLE	Margin	-1.42524	Margin	-0.874825	Margin	-0.478334	Margin	-0.318878	Margin	-0.292751	Unmethy	-3.4597	Unmethy	-3.18373	Unmethy	-2.68904	Unmethy	-2.77784	Unmethy	-2.60479
cg07345108	10	49563469	WDFY4	NM_020945	TSS200	NA	SLE	Margin	-1.22237	Margin	-0.601634	Margin	0.174914	Margin	0.0096342	Margin	-0.0387783	Unmethy	-3.3607	Unmethy	-3.52185	Unmethy	-2.64092	Unmethy	-2.41455	Unmethy	-1.55372
cg09897604	10	49563555	WDFY4;WDFY4	NM_020945;NM_020945	5'UTR;1stExon	NA	SLE	Margin	-1.62178	Margin	-1.01214	Margin	-0.595664	Margin	-0.288009	Margin	-0.304836	Unmethy	-3.35326	Unmethy	-3.39268	Unmethy	-2.95584	Unmethy	-3.18164	Unmethy	-3.10202
cg23837220	10	49813403	WDFY4	NM_020945	Body	NA	SLE	Methy	1.88413	Methy	1.73755	Methy	1.2924	Margin	0.80692	Margin	0.870491	Methy	2.87256	Methy	2.49596	Methy	1.8632	Methy	2.04092	Methy	2.18308
cg15773925	10	68322876	CTNNA3;CTNNA3	NM_001127384;NM_013266	Body;Body	NA	Asthma(toluenediisocyanateinduced)	Methy	1.83121	Methy	1.41159	Methy	1.25286	Margin	0.751682	Margin	0.909172	Margin	1.11369	Methy	2.25773	Methy	1.83794	Methy	2.04027	Methy	2.16052
cg05626013	10	68355258	CTNNA3;LRRTM3;CTNNA3	NM_001127384;NM_178011;NM_013266	Body;TSS1500;Body	NA	Asthma(toluenediisocyanateinduced)	Margin	-1.50147	Margin	-1.51943	Margin	-1.3234	Margin	-1.22075	Margin	-1.36548	Margin	-1.27368	Margin	-1.58457	Margin	-1.60144	Margin	-1.38794	Unmethy	-1.76394
cg07002403	10	68357957	CTNNA3;LRRTM3;CTNNA3	NM_001127384;NM_178011;NM_013266	Body;Body;Body	NA	Asthma(toluenediisocyanateinduced)	Unmethy	-2.07509	Unmethy	-1.91227	Unmethy	-1.91198	Margin	-1.76846	Margin	-1.68712	Margin	-1.53047	Unmethy	-2.27942	Unmethy	-2.22789	Unmethy	-2.32506	Unmethy	-2.38783
cg24855781	10	68358173	CTNNA3;LRRTM3;CTNNA3	NM_001127384;NM_178011;NM_013266	Body;Body;Body	NA	Asthma(toluenediisocyanateinduced)	Margin	-1.70295	Margin	-1.38161	Margin	-1.31308	Margin	-1.28839	Margin	-1.37631	Margin	-1.23432	Margin	-1.54147	Margin	-1.5996	Margin	-1.44227	Unmethy	-1.57634
cg07020596	10	68816240	CTNNA3;CTNNA3	NM_001127384;NM_013266	Body;Body	NA	Asthma(toluenediisocyanateinduced)	Methy	1.58275	Methy	1.32087	Methy	1.01233	Margin	0.450151	Margin	0.514627	Margin	0.981269	Methy	2.12334	Methy	2.05385	Methy	2.08072	Methy	1.92082
cg13215003	10	68831359	CTNNA3;CTNNA3	NM_001127384;NM_013266	Body;Body	NA	Asthma(toluenediisocyanateinduced)	Methy	0.962215	Margin	0.927836	Margin	0.80092	Margin	0.516998	Margin	0.611894	Margin	0.648575	Methy	0.908524	Methy	0.943978	Methy	0.958023	Methy	0.951615
cg06044004	10	68862589	CTNNA3;CTNNA3	NM_001127384;NM_013266	Body;Body	NA	Asthma(toluenediisocyanateinduced)	Methy	1.24352	Methy	1.0675	Margin	0.707695	Margin	0.331505	Margin	0.393622	Margin	0.637625	Methy	1.17609	Methy	1.32917	Methy	1.63178	Methy	1.47175
cg01249544	10	69042661	CTNNA3;CTNNA3	NM_001127384;NM_013266	Body;Body	NA	Asthma(toluenediisocyanateinduced)	Margin	0.616382	Margin	0.130596	Margin	-1.08752	Margin	-1.32725	Margin	-0.430045	Methy	1.26357	Methy	1.48832	Methy	1.19	Methy	1.19302	Margin	0.637184
cg19996026	10	69125810	CTNNA3;CTNNA3	NM_013266;NM_013266	5'UTR;1stExon	NA	Asthma(toluenediisocyanateinduced)	Methy	1.67166	Methy	1.64889	Methy	1.53742	Margin	0.803848	Methy	1.10237	Methy	1.43197	Methy	1.74604	Methy	1.97189	Methy	1.86004	Methy	1.9716
cg07128021	10	80494243	LOC283050;LOC283050;LOC283050	NR_024431;NR_024429;NR_015429	Body;Body;Body	N_Shelf	IBD	Margin	0.413804	Margin	-0.377038	Unmethy	-1.67867	Margin	-1.88595	Margin	-0.941047	Margin	-0.368033	Methy	1.36299	Methy	1.22687	Methy	1.26285	Methy	0.987781
cg22620363	10	80496800	LOC283050;LOC283050;LOC283050	NR_024431;NR_024429;NR_015429	Body;Body;Body	N_Shore	IBD	Unmethy	-3.68644	Unmethy	-2.60714	Unmethy	-2.50879	Margin	-0.633096	Unmethy	-2.29136	Unmethy	-4.08424	Unmethy	-5.32383	Unmethy	-4.81066	Unmethy	-5.19482	Unmethy	-5.50662
cg21344746	10	80501236	ZMIZ1	NM_020338	5'UTR	S_Shore	IBD	Unmethy	-2.9664	Margin	-1.57242	Margin	-0.620778	Margin	-0.0972375	Margin	-0.985852	Unmethy	-4.44307	Unmethy	-5.04733	Unmethy	-4.60646	Unmethy	-5.28028	Unmethy	-5.00037
cg03450842	10	80504953	ZMIZ1	NM_020338	5'UTR	NA	IBD	Margin	0.908165	Methy	1.26567	Methy	1.86825	Methy	1.5513	Methy	1.03222	Margin	1.01653	Methy	0.756044	Methy	0.739987	Margin	0.588011	Margin	0.2633
cg02145310	10	80514815	ZMIZ1	NM_020338	5'UTR	NA	IBD	Margin	0.26665	Margin	0.790227	Methy	1.86499	Methy	1.98362	Methy	1.40789	Unmethy	-2.0826	Margin	0.197962	Margin	-0.0609765	Margin	0.0641103	Margin	0.198436
cg17823346	10	80518149	ZMIZ1	NM_020338	5'UTR	NA	IBD	Margin	0.218505	Methy	1.15127	Methy	1.9513	Methy	1.62895	Methy	1.49126	Methy	1.5223	Margin	0.584359	Margin	-0.38706	Margin	-0.514273	Margin	-0.824493
cg24982682	10	80523943	ZMIZ1	NM_020338	5'UTR	NA	IBD	Margin	-0.591946	Margin	0.033843	Margin	0.717587	Methy	1.33785	Margin	0.658553	Margin	-0.482971	Unmethy	-2.55164	Unmethy	-2.10376	Unmethy	-2.83237	Unmethy	-3.09797
cg14530290	10	80523991	ZMIZ1	NM_020338	5'UTR	NA	IBD	Margin	-0.510675	Margin	0.0449157	Margin	0.582886	Methy	1.25625	Margin	0.470896	Margin	-0.501387	Unmethy	-2.29902	Margin	-1.75134	Unmethy	-2.46832	Unmethy	-2.82174
cg13186559	10	80524041	ZMIZ1	NM_020338	5'UTR	NA	IBD	Margin	-0.547902	Margin	0.325264	Methy	1.42132	Methy	2.13975	Methy	0.993183	Margin	-0.646932	Unmethy	-2.20634	Margin	-1.87465	Unmethy	-2.54632	Unmethy	-2.7435
cg10812439	10	80532777	ZMIZ1	NM_020338	5'UTR	NA	IBD	Methy	1.6407	Methy	1.8504	Methy	2.81327	Methy	2.68872	Methy	2.24722	Margin	-0.84179	Methy	1.04321	Methy	1.13951	Methy	1.2585	Methy	1.24293
cg14841514	10	80536625	ZMIZ1	NM_020338	5'UTR	NA	IBD	Methy	2.70632	Methy	2.36892	Methy	3.48293	Methy	4.15422	Methy	3.24457	Margin	1.08515	Methy	1.30795	Methy	3.0158	Methy	2.8589	Methy	2.27194
cg18295744	10	80542932	ZMIZ1	NM_020338	5'UTR	NA	IBD	Methy	1.49203	Methy	1.55045	Methy	1.63179	Margin	0.843701	Methy	1.01421	Margin	0.82942	Methy	1.96861	Methy	1.62666	Methy	1.57444	Methy	1.20721
cg11961495	10	80543803	ZMIZ1	NM_020338	5'UTR	NA	IBD	Methy	1.26481	Methy	1.88155	Methy	3.30755	Methy	3.84215	Methy	3.22201	Methy	1.69869	Methy	0.853418	Methy	0.860109	Methy	0.912184	Margin	0.346038
cg24983858	10	80557609	ZMIZ1	NM_020338	5'UTR	NA	IBD	Margin	0.883779	Methy	1.3182	Methy	1.23191	Methy	1.63326	Methy	1.82168	Methy	1.59647	Margin	0.63155	Margin	0.634663	Margin	0.659659	Methy	0.929886
cg16854826	10	80559529	ZMIZ1	NM_020338	5'UTR	NA	IBD	Margin	0.772263	Methy	1.05573	Methy	1.49526	Methy	1.45532	Methy	1.40351	Margin	0.944574	Margin	0.593568	Margin	0.517048	Margin	0.64641	Methy	0.919341
cg07798593	10	80560244	ZMIZ1	NM_020338	5'UTR	NA	IBD	Margin	0.916831	Methy	1.25625	Methy	1.21478	Methy	1.44753	Methy	1.66132	Methy	1.27741	Methy	0.866207	Methy	0.725824	Margin	0.805155	Margin	0.709448
cg27537918	10	80567433	ZMIZ1	NM_020338	5'UTR	NA	IBD	Margin	-1.68103	Margin	-1.10234	Margin	-0.255271	Margin	-1.25962	Unmethy	-3.12193	Unmethy	-2.89934	Unmethy	-3.13905	Unmethy	-2.86681	Unmethy	-3.04288	Unmethy	-3.1164
cg23865980	10	80574382	ZMIZ1	NM_020338	5'UTR	NA	IBD	Margin	-0.990238	Margin	0.286319	Methy	1.03505	Methy	1.57287	Methy	1.05768	Margin	-1.01162	Unmethy	-3.13411	Unmethy	-2.53759	Unmethy	-2.81485	Unmethy	-3.1155
cg10427868	10	80606804	ZMIZ1	NM_020338	5'UTR	NA	IBD	Methy	1.03856	Methy	1.14737	Methy	2.11476	Methy	1.96685	Methy	1.64141	Margin	-1.69997	Methy	0.771467	Methy	1.08579	Methy	1.21901	Methy	1.40267
cg18712809	10	80608678	ZMIZ1	NM_020338	5'UTR	NA	IBD	Margin	-0.12832	Margin	0.447982	Methy	1.04486	Methy	1.22993	Margin	0.788516	Margin	-0.309171	Margin	-0.919147	Margin	-0.718178	Margin	-0.75743	Margin	-0.704333
cg25034155	10	80615365	ZMIZ1	NM_020338	5'UTR	NA	IBD	Margin	-0.241681	Margin	0.210732	Methy	1.45841	Methy	1.8465	Methy	1.26703	Margin	0.232366	Margin	-1.29243	Margin	-0.904822	Margin	-1.00856	Margin	-0.581184
cg13843840	10	80633134	ZMIZ1	NM_020338	Body	NA	IBD	Methy	1.36295	Methy	1.0555	Margin	0.754173	Margin	0.714777	Margin	0.833501	Margin	0.337404	Methy	1.38817	Methy	1.94092	Methy	2.06122	Methy	1.994
cg18737081	10	80669813	ZMIZ1	NM_020338	Body	N_Shelf	IBD	Margin	0.411696	Methy	1.40673	Methy	3.22416	Methy	4.14317	Methy	1.5791	Methy	3.02983	Margin	0.280148	Margin	-0.0623429	Margin	-0.00990441	Margin	-0.119194
cg20744163	10	80669847	ZMIZ1	NM_020338	Body	N_Shelf	IBD	Margin	0.265623	Methy	1.80019	Methy	3.87781	Methy	5.14911	Methy	1.92108	Methy	4.24871	Margin	-0.775093	Margin	-1.22139	Margin	-0.724842	Unmethy	-2.41177
cg19215199	10	80675290	ZMIZ1	NM_020338	Body	S_Shore	IBD	Methy	1.89642	Methy	1.84024	Methy	2.35898	Methy	1.35019	Methy	1.11504	Margin	0.764509	Methy	2.17188	Methy	2.14757	Methy	2.29698	Methy	2.65644
cg06308720	10	80676072	ZMIZ1	NM_020338	Body	S_Shelf	IBD	Methy	1.87034	Methy	1.804	Methy	2.49841	Methy	2.1742	Methy	1.85884	Margin	-0.452974	Methy	2.33555	Methy	2.0511	Methy	2.26115	Methy	2.3679
cg17753789	10	80696772	ZMIZ1	NM_020338	Body	NA	IBD	Margin	-0.172891	Margin	0.303532	Methy	1.17643	Margin	-0.00730188	Margin	-0.622818	Margin	0.0804543	Margin	-0.390106	Margin	-0.453643	Margin	-0.231907	Margin	0.214378
cg06259934	10	80704380	ZMIZ1	NM_020338	Body	NA	IBD	Margin	0.263579	Methy	1.39104	Methy	3.50283	Methy	4.5278	Methy	3.50744	Methy	4.44483	Margin	0.606215	Margin	-0.529696	Margin	-0.20897	Margin	0.620903
cg02795981	10	80715125	ZMIZ1	NM_020338	Body	NA	IBD	Methy	1.41208	Margin	0.849776	Margin	0.48777	Margin	-0.0265201	Margin	-1.30249	Margin	0.207209	Methy	2.25572	Methy	2.23624	Methy	2.36502	Methy	2.40222
cg06162030	10	80723193	ZMIZ1	NM_020338	Body	NA	IBD	Margin	-0.423414	Margin	0.0194456	Margin	0.738953	Methy	1.59724	Margin	0.77233	Margin	0.181638	Unmethy	-2.48282	Margin	-1.65427	Unmethy	-2.07164	Unmethy	-2.1654
cg02715021	10	80730579	ZMIZ1	NM_020338	Body	NA	IBD	Methy	6.58598	Unmethy	6.66243	Unmethy	6.33733	Unmethy	7.15152	Unmethy	6.20467	Methy	6.48014	Methy	6.30265	Methy	6.16672	Unmethy	6.37513	Margin	6.27688
cg07261186	10	80740695	ZMIZ1	NM_020338	Body	NA	IBD	Methy	2.51338	Methy	2.13129	Methy	2.19006	Methy	1.34738	Margin	-0.862563	Methy	2.91866	Methy	3.05395	Methy	3.07963	Methy	3.0489	Methy	2.81479
cg25365214	10	80740960	ZMIZ1	NM_020338	Body	NA	IBD	Methy	6.20415	Unmethy	6.36815	Unmethy	6.15025	Unmethy	6.1663	Margin	5.81451	Methy	6.61026	Methy	6.34708	Methy	6.15664	Unmethy	6.68019	Unmethy	6.72402
cg13676902	10	80745484	ZMIZ1	NM_020338	3'UTR	NA	IBD	Methy	5.80478	Methy	5.432	Methy	5.56917	Unmethy	5.81289	Methy	5.5658	Methy	4.72887	Methy	5.52499	Methy	5.70908	Methy	5.22664	Methy	5.45136
cg14349937	10	90083501	RNLS;RNLS	NM_001031709;NM_018363	Body;Body	NA	T1D	Margin	0.268347	Methy	1.70009	Methy	2.83128	Methy	2.94978	Methy	2.71726	Methy	2.68219	Margin	0.209151	Margin	-1.75459	Unmethy	-1.78676	Unmethy	-1.77354
cg17766305	10	90137010	RNLS;RNLS	NM_001031709;NM_018363	Body;Body	NA	T1D	Margin	-0.764267	Margin	0.0197982	Margin	0.293392	Methy	1.21557	Methy	2.76239	Margin	-1.46095	Unmethy	-3.21858	Unmethy	-2.42151	Unmethy	-2.86374	Unmethy	-3.28507
cg23126166	10	90225204	RNLS;RNLS	NM_001031709;NM_018363	Body;Body	NA	T1D	Methy	1.64923	Methy	1.97232	Methy	2.74476	Methy	3.02977	Methy	2.69281	Methy	3.81844	Margin	-0.303443	Methy	1.151	Methy	1.40404	Methy	3.11077
cg06079710	10	90333265	RNLS;RNLS	NM_018363;NM_001031709	TSS1500;TSS1500	S_Shore	T1D	Margin	-1.62164	Margin	-1.18081	Margin	-1.01175	Margin	-0.605381	Margin	-0.836602	Unmethy	-1.7916	Unmethy	-2.12908	Unmethy	-2.17693	Unmethy	-2.18632	Unmethy	-2.18228
cg15972243	10	90333415	RNLS;RNLS	NM_018363;NM_001031709	TSS1500;TSS1500	S_Shore	T1D	Margin	-1.07024	Margin	-0.75265	Margin	-0.641571	Margin	-0.191225	Margin	-0.358872	Margin	-1.16384	Margin	-1.31635	Margin	-1.50901	Unmethy	-1.5228	Margin	-1.41314
cg18197594	10	94324816	IDE	NM_004969	TSS1500	S_Shore	T2D	Methy	1.06378	Margin	0.559791	Margin	-0.35276	Methy	1.30985	Methy	1.97279	Methy	1.21883	Methy	1.43184	Methy	1.02176	Methy	1.02873	Methy	1.01376
cg16060189	10	94340557	NA	NA	NA	N_Shore	T2D	Margin	0.863568	Methy	1.68082	Methy	2.51765	Methy	3.0915	Methy	2.00819	Methy	1.28602	Methy	0.800956	Margin	0.427566	Margin	0.191303	Unmethy	-2.30677
cg03468382	10	94343932	KIF11	NM_004523	Body	S_Shore	T2D	Unmethy	-2.24424	Unmethy	-1.9305	Margin	-1.62577	Margin	-1.96345	Unmethy	-2.2558	Unmethy	-1.92224	Unmethy	-2.68532	Unmethy	-2.66937	Unmethy	-2.85493	Unmethy	-2.63963
ch.10.1963761R	10	94363462	KIF11	NM_004523	Body	NA	T2D	Margin	-1.8032	Unmethy	-1.89254	Unmethy	-2.02256	Margin	-2.03843	Unmethy	-1.92572	Unmethy	-1.93607	Margin	-1.77274	Margin	-1.71565	Unmethy	-1.74752	Unmethy	-1.74071
cg20180364	10	94438512	HHEX	NM_002729	TSS1500	N_Shore	T2D	Margin	-0.509145	Margin	0.602694	Methy	1.90006	Methy	1.74694	Margin	0.312877	Margin	1.07321	Unmethy	-3.32531	Unmethy	-2.48149	Unmethy	-2.98047	Unmethy	-3.03424
cg09721427	10	94438682	HHEX	NM_002729	TSS1500	Island	T2D	Margin	-1.89599	Margin	-1.45643	Margin	-1.20541	Margin	-1.16681	Margin	-1.21534	Margin	-1.33132	Unmethy	-2.7513	Unmethy	-2.4797	Unmethy	-2.72582	Unmethy	-2.66392
cg04413153	10	94438708	HHEX	NM_002729	TSS1500	Island	T2D	Unmethy	-2.89901	Unmethy	-2.28648	Unmethy	-2.12756	Margin	-2.04203	Unmethy	-1.90842	Unmethy	-2.1926	Unmethy	-3.41574	Unmethy	-3.28766	Unmethy	-3.04022	Unmethy	-3.21093
cg14689537	10	94440846	HHEX	NM_002729	Body	N_Shore	T2D	Unmethy	-2.75172	Unmethy	-1.86933	Unmethy	-2.13188	Margin	-0.840611	Margin	-1.11174	Unmethy	-3.69553	Unmethy	-3.77005	Unmethy	-3.51121	Unmethy	-3.8275	Unmethy	-4.00787
cg18599843	10	94440974	HHEX	NM_002729	Body	N_Shore	T2D	Unmethy	-2.01595	Unmethy	-2.08645	Margin	-1.56913	Margin	-0.932969	Margin	-1.19451	Unmethy	-2.51801	Unmethy	-2.32097	Unmethy	-2.58757	Unmethy	-2.57069	Unmethy	-2.64776
cg24787755	10	94440996	HHEX	NM_002729	Body	N_Shore	T2D	Unmethy	-1.97008	Margin	-1.24053	Margin	-1.01566	Margin	-0.48325	Margin	-0.508749	Unmethy	-3.17721	Unmethy	-3.39152	Unmethy	-2.94097	Unmethy	-3.09378	Unmethy	-3.3365
cg16508068	10	94441716	HHEX	NM_002729	Body	Island	T2D	Margin	-1.76612	Margin	-0.927071	Margin	-0.729124	Margin	-0.20163	Margin	-0.43041	Unmethy	-3.18852	Unmethy	-3.52801	Unmethy	-2.78711	Unmethy	-3.19805	Unmethy	-3.69473
cg03330490	10	94442216	HHEX	NM_002729	Body	Island	T2D	Unmethy	-1.99958	Margin	-1.45533	Margin	-1.26152	Margin	-0.487219	Margin	-0.0177565	Unmethy	-5.06532	Unmethy	-5.16782	Unmethy	-4.93949	Unmethy	-4.60195	Unmethy	-5.6588
cg00876273	10	94442291	HHEX	NM_002729	Body	Island	T2D	Unmethy	-2.14315	Margin	-1.58226	Unmethy	-1.78192	Margin	-0.940725	Margin	-0.440886	Unmethy	-3.03119	Unmethy	-3.13029	Unmethy	-2.75341	Unmethy	-2.85573	Unmethy	-3.326
cg02185052	10	94442460	HHEX	NM_002729	Body	S_Shore	T2D	Unmethy	-1.991	Margin	-1.27874	Margin	-1.23583	Margin	-0.749134	Margin	-0.170139	Unmethy	-2.44312	Unmethy	-2.77572	Unmethy	-2.59079	Unmethy	-2.58581	Unmethy	-2.88997
cg07616394	10	94442534	HHEX	NM_002729	Body	S_Shore	T2D	Unmethy	-2.35667	Unmethy	-1.87007	Unmethy	-2.15216	Margin	-1.39458	Margin	-0.0339517	Unmethy	-2.94516	Unmethy	-2.96307	Unmethy	-2.75295	Unmethy	-2.78089	Unmethy	-2.96732
cg14451882	10	94446528	NA	NA	NA	S_Shore	T2D	Methy	1.27654	Methy	1.3214	Methy	1.16835	Margin	0.547271	Margin	0.947499	Methy	1.94971	Methy	1.42904	Methy	1.51918	Methy	1.71686	Methy	1.59888
cg25506282	10	94452341	NA	NA	NA	S_Shelf	T2D	Margin	-1.76032	Margin	-1.15723	Margin	-0.450859	Margin	-0.393336	Margin	-0.521553	Unmethy	-2.54299	Unmethy	-3.013	Unmethy	-2.66682	Unmethy	-2.67529	Unmethy	-2.72684
cg04089434	10	94506951	NA	NA	NA	NA	T2D	Unmethy	-1.94747	Margin	-1.56606	Margin	-0.736396	Margin	-1.1044	Margin	-1.7256	Unmethy	-3.43272	Unmethy	-3.4204	Unmethy	-3.05485	Unmethy	-3.47932	Unmethy	-3.43974
cg25131632	10	94539020	NA	NA	NA	NA	T2D	Methy	3.43729	Methy	2.95256	Methy	4.01436	Methy	3.59028	Methy	3.23333	Unmethy	-4.10068	Methy	4.7808	Methy	4.8982	Methy	4.83799	Methy	4.8259
cg19704683	10	94599381	EXOC6;EXOC6	NM_001013848;NM_019053	Body;Body	S_Shore	T2D	Methy	1.73585	Methy	1.93237	Methy	2.43423	Methy	2.69768	Methy	2.27306	Methy	1.72507	Methy	1.26674	Methy	1.30264	Methy	1.27122	Margin	0.556475
cg09176957	10	94789621	EXOC6;EXOC6	NM_001013848;NM_019053	Body;Body	NA	T2D	Margin	-1.62113	Margin	-0.852844	Margin	-0.134163	Margin	-0.0813447	Margin	-0.634916	Unmethy	-2.07342	Unmethy	-2.95833	Unmethy	-2.5072	Unmethy	-2.59371	Unmethy	-3.04008
cg20023578	10	114699616	TCF7L2;TCF7L2;TCF7L2;TCF7L2;TCF7L2;TCF7L2	NM_001146274;NM_001146286;NM_030756;NM_001146284;NM_001146283;NM_001146285	TSS1500;TSS1500;TSS1500;TSS1500;TSS1500;TSS1500	N_Shelf	T2D	Margin	-1.50663	Margin	-1.51526	Margin	-1.46769	Margin	-1.56183	Margin	-1.7468	Margin	-1.55453	Unmethy	-2.00395	Margin	-1.52374	Unmethy	-1.81806	Unmethy	-1.61665
cg04557665	10	114702400	TCF7L2;TCF7L2;TCF7L2;TCF7L2;TCF7L2;TCF7L2	NM_001146284;NM_001146285;NM_030756;NM_001146274;NM_001146286;NM_001146283	Body;Body;Body;Body;Body;Body	Island	T2D	Unmethy	-3.18503	Unmethy	-2.7017	Unmethy	-2.41896	Margin	-1.68322	Unmethy	-2.77521	Unmethy	-3.51175	Unmethy	-3.70103	Unmethy	-3.50458	Unmethy	-3.73612	Unmethy	-3.72235
cg09022607	10	114702685	TCF7L2;TCF7L2;TCF7L2;TCF7L2;TCF7L2;TCF7L2	NM_001146284;NM_001146285;NM_030756;NM_001146274;NM_001146286;NM_001146283	Body;Body;Body;Body;Body;Body	S_Shore	T2D	Margin	-0.422877	Margin	0.113771	Margin	0.549927	Methy	1.84508	Margin	0.14213	Margin	-1.09257	Margin	-1.41415	Margin	-1.17962	Margin	-1.29333	Margin	-1.45435
cg27162705	10	114703014	TCF7L2;TCF7L2;TCF7L2;TCF7L2;TCF7L2;TCF7L2	NM_001146284;NM_001146285;NM_030756;NM_001146274;NM_001146286;NM_001146283	Body;Body;Body;Body;Body;Body	S_Shore	T2D	Margin	0.0136174	Margin	0.353431	Methy	1.19926	Methy	2.16716	Margin	0.697321	Margin	-0.740999	Margin	-0.650401	Margin	-0.382725	Margin	-0.382844	Margin	-0.50901
cg11748187	10	114703098	TCF7L2;TCF7L2;TCF7L2;TCF7L2;TCF7L2;TCF7L2	NM_001146284;NM_001146285;NM_030756;NM_001146274;NM_001146286;NM_001146283	Body;Body;Body;Body;Body;Body	S_Shore	T2D	Margin	0.22551	Methy	1.10697	Methy	1.96495	Methy	2.56266	Methy	1.16995	Margin	-0.548406	Margin	-0.361636	Margin	-0.261782	Margin	-0.165047	Margin	-0.0670283
cg00159523	10	114703177	TCF7L2;TCF7L2;TCF7L2;TCF7L2;TCF7L2;TCF7L2	NM_001146284;NM_001146285;NM_030756;NM_001146274;NM_001146286;NM_001146283	Body;Body;Body;Body;Body;Body	S_Shore	T2D	Margin	-0.236674	Margin	0.539336	Methy	2.46771	Methy	4.12459	Methy	1.64806	Margin	-1.53276	Unmethy	-2.09611	Margin	-1.45192	Unmethy	-1.53804	Unmethy	-1.56746
cg03683087	10	114736061	TCF7L2;TCF7L2;TCF7L2;TCF7L2;TCF7L2;TCF7L2	NM_001146284;NM_001146285;NM_030756;NM_001146274;NM_001146286;NM_001146283	Body;Body;Body;Body;Body;Body	NA	T2D	Unmethy	-2.4644	Margin	-1.50157	Margin	-1.07955	Margin	-1.06775	Margin	-1.71251	Margin	-1.6848	Unmethy	-4.57706	Unmethy	-4.27692	Unmethy	-3.97986	Unmethy	-4.24767
cg19506849	10	114757599	TCF7L2;TCF7L2;TCF7L2;TCF7L2;TCF7L2;TCF7L2	NM_001146284;NM_001146285;NM_030756;NM_001146274;NM_001146286;NM_001146283	Body;Body;Body;Body;Body;Body	NA	T2D	Methy	2.51083	Methy	1.88015	Margin	0.689351	Margin	0.762343	Methy	2.72366	Methy	3.21288	Methy	2.72765	Methy	2.7894	Methy	3.00744	Methy	3.09552
cg03339956	10	114808225	TCF7L2;TCF7L2;TCF7L2;TCF7L2;TCF7L2;TCF7L2	NM_001146284;NM_001146285;NM_030756;NM_001146274;NM_001146286;NM_001146283	Body;Body;Body;Body;Body;Body	NA	T2D	Methy	1.47491	Methy	1.28421	Methy	1.57283	Methy	1.64455	Methy	1.62546	Margin	-0.673067	Methy	1.90286	Methy	1.66167	Methy	1.81797	Methy	1.8187
cg27062243	10	114823710	TCF7L2;TCF7L2;TCF7L2;TCF7L2;TCF7L2;TCF7L2	NM_001146284;NM_001146285;NM_030756;NM_001146274;NM_001146286;NM_001146283	Body;Body;Body;Body;Body;Body	NA	T2D	Methy	1.65152	Methy	1.44857	Methy	1.10967	Margin	0.569365	Margin	0.539626	Margin	0.892589	Methy	2.10442	Methy	2.11972	Methy	2.13393	Methy	1.97256
cg18842107	10	114843845	TCF7L2;TCF7L2;TCF7L2;TCF7L2;TCF7L2;TCF7L2	NM_001146284;NM_001146285;NM_030756;NM_001146274;NM_001146286;NM_001146283	Body;Body;Body;Body;Body;Body	NA	T2D	Methy	1.85432	Methy	1.66504	Methy	2.23133	Methy	2.41907	Methy	2.41382	Methy	2.15058	Margin	-0.00705277	Methy	1.51534	Methy	1.85388	Methy	2.66478
cg03510732	10	114861921	TCF7L2;TCF7L2;TCF7L2;TCF7L2;TCF7L2;TCF7L2	NM_001146284;NM_001146285;NM_030756;NM_001146274;NM_001146286;NM_001146283	Body;Body;Body;Body;Body;Body	NA	T2D	Methy	2.08069	Methy	1.66698	Methy	1.32077	Margin	0.892304	Margin	0.806473	Margin	1.12897	Methy	2.53052	Methy	2.55835	Methy	2.54499	Methy	2.20731
cg19279080	10	114900800	TCF7L2;TCF7L2;TCF7L2;TCF7L2;TCF7L2;TCF7L2	NM_001146284;NM_001146285;NM_030756;NM_001146274;NM_001146286;NM_001146283	Body;Body;Body;Body;Body;Body	NA	T2D	Methy	6.1356	Unmethy	6.41576	Methy	5.69485	Unmethy	5.85583	Unmethy	6.16986	Methy	5.91331	Methy	5.92328	Methy	6.03762	Methy	5.84164	Methy	5.98331
cg05923857	10	114901605	TCF7L2;TCF7L2;TCF7L2;TCF7L2;TCF7L2;TCF7L2	NM_001146284;NM_001146285;NM_030756;NM_001146274;NM_001146286;NM_001146283	Body;Body;Body;Body;Body;Body	NA	T2D	Methy	1.54418	Margin	0.925303	Methy	1.583	Methy	3.34909	Methy	2.51716	Methy	3.27693	Unmethy	-2.56753	Methy	2.05406	Methy	1.83069	Methy	1.9319
cg24788483	10	114901642	TCF7L2;TCF7L2;TCF7L2;TCF7L2;TCF7L2;TCF7L2	NM_001146284;NM_001146285;NM_030756;NM_001146274;NM_001146286;NM_001146283	Body;Body;Body;Body;Body;Body	NA	T2D	Methy	2.39289	Methy	1.28645	Methy	2.14218	Methy	4.17659	Methy	2.83212	Methy	3.822	Margin	-1.77141	Methy	2.93243	Methy	2.60818	Methy	2.96929
cg17608440	10	114902139	TCF7L2;TCF7L2;TCF7L2;TCF7L2;TCF7L2;TCF7L2	NM_001146284;NM_001146285;NM_030756;NM_001146274;NM_001146286;NM_001146283	Body;Body;Body;Body;Body;Body	NA	T2D	Methy	6.42502	Unmethy	6.53932	Unmethy	7.42805	Unmethy	6.5747	Unmethy	6.67027	Methy	7.21273	Methy	6.57602	Methy	6.64857	Methy	6.04158	Unmethy	6.42969
cg07861463	10	114902165	TCF7L2;TCF7L2;TCF7L2;TCF7L2;TCF7L2;TCF7L2	NM_001146284;NM_001146285;NM_030756;NM_001146274;NM_001146286;NM_001146283	Body;Body;Body;Body;Body;Body	NA	T2D	Methy	5.95951	Margin	5.8584	Methy	5.73948	Methy	5.58024	Methy	5.5345	Methy	5.7867	Methy	5.74469	Methy	5.65008	Methy	5.72387	Methy	5.66466
cg24861253	10	114915696	TCF7L2;TCF7L2;TCF7L2;TCF7L2;TCF7L2;TCF7L2	NM_001146283;NM_001146285;NM_030756;NM_001146274;NM_001146286;NM_001146284	3'UTR;Body;Body;Body;3'UTR;3'UTR	Island	T2D	Methy	6.11169	Margin	5.84674	Methy	5.73955	Unmethy	6.31136	Unmethy	5.82933	Methy	5.84555	Methy	6.39037	Methy	6.74311	Margin	6.20434	Methy	5.73665
cg08862394	10	132786952	TCERG1L	NM_174937	Body	S_Shelf	T2D	Methy	1.61576	Methy	1.62161	Methy	1.44421	Methy	1.04625	Margin	0.948394	Methy	1.52702	Methy	2.14461	Methy	1.85393	Methy	2.15333	Methy	2.17962
cg01312265	10	132820442	TCERG1L	NM_174937	Body	NA	T2D	Methy	1.0139	Margin	0.986368	Margin	0.85668	Methy	1.0341	Methy	1.21223	Methy	1.17387	Methy	0.858866	Methy	0.830166	Methy	0.959172	Methy	1.09958
cg06938601	10	132832676	TCERG1L	NM_174937	Body	NA	T2D	Methy	1.16634	Margin	0.896836	Margin	0.934541	Margin	0.497836	Margin	0.492465	Margin	0.763779	Methy	1.21166	Methy	1.69132	Methy	1.53612	Methy	1.45166
cg18424850	10	132835776	TCERG1L	NM_174937	Body	NA	T2D	Methy	1.3793	Methy	1.25425	Methy	1.19996	Methy	0.940368	Margin	0.957452	Methy	1.19295	Methy	1.74092	Methy	1.58258	Methy	1.62713	Methy	1.69121
cg03403640	10	132844338	TCERG1L	NM_174937	Body	NA	T2D	Methy	1.47693	Methy	1.17252	Margin	0.139619	Methy	1.6677	Methy	1.35872	Methy	1.66123	Methy	1.01952	Methy	1.24291	Methy	1.07321	Margin	0.717059
cg14645017	10	132867398	TCERG1L	NM_174937	Body	NA	T2D	Margin	0.802443	Margin	0.962355	Margin	0.757077	Margin	0.654795	Methy	1.045	Margin	0.95912	Methy	0.786371	Methy	0.809734	Methy	0.916733	Margin	0.840873
cg25367201	10	132890461	TCERG1L	NM_174937	Body	NA	T2D	Methy	1.90157	Methy	1.50757	Margin	0.956336	Margin	0.780564	Methy	1.59296	Margin	0.499536	Methy	2.11249	Methy	2.11789	Methy	2.14896	Methy	2.28333
cg14614689	10	132909977	TCERG1L	NM_174937	Body	NA	T2D	Methy	1.35009	Methy	1.23518	Methy	1.12206	Margin	0.760116	Margin	0.908533	Margin	0.79293	Methy	1.54495	Methy	1.48692	Methy	1.44721	Methy	1.46311
cg12497883	10	132948159	TCERG1L	NM_174937	Body	N_Shore	T2D	Margin	0.904212	Methy	1.0211	Margin	0.983594	Methy	1.04254	Methy	1.02216	Methy	1.18351	Methy	0.746865	Methy	0.832392	Margin	0.793972	Margin	0.756286
cg24067982	10	132999019	TCERG1L	NM_174937	Body	N_Shore	T2D	Unmethy	-2.0162	Unmethy	-2.14955	Unmethy	-2.35615	Unmethy	-2.09749	Margin	-1.86336	Unmethy	-2.13617	Unmethy	-2.30489	Unmethy	-1.92487	Unmethy	-1.97675	Unmethy	-2.16283
cg10175795	10	132999184	TCERG1L	NM_174937	Body	Island	T2D	Margin	-1.51814	Margin	-1.46601	Unmethy	-1.727	Margin	-1.35979	Margin	-1.25121	Margin	-1.20841	Unmethy	-1.91744	Margin	-1.68647	Unmethy	-1.59783	Unmethy	-1.72833
cg06304097	10	132999857	TCERG1L	NM_174937	1stExon	Island	T2D	Unmethy	-4.24059	Unmethy	-3.56257	Unmethy	-5.15317	Unmethy	-4.07345	Unmethy	-4.42766	Margin	-1.77178	Unmethy	-5.13969	Unmethy	-4.82755	Unmethy	-5.41182	Unmethy	-5.25236
cg03943081	10	133000636	TCERG1L	NM_174937	TSS1500	Island	T2D	Margin	-1.86127	Unmethy	-1.88462	Unmethy	-1.91666	Margin	-1.80692	Unmethy	-2.09138	Margin	-1.57157	Unmethy	-2.32898	Unmethy	-2.24001	Unmethy	-2.21309	Unmethy	-2.33399
cg18138206	10	133000721	TCERG1L	NM_174937	TSS1500	Island	T2D	Margin	-1.67032	Margin	-1.17525	Margin	-1.34995	Margin	-1.45994	Margin	-1.03325	Margin	-1.01325	Margin	-1.61939	Margin	-1.71886	Unmethy	-1.58149	Unmethy	-1.70493
cg20239333	10	133001321	TCERG1L	NM_174937	TSS1500	S_Shore	T2D	Margin	-0.840608	Margin	0.278808	Margin	0.805216	Margin	0.77756	Margin	0.675127	Margin	-0.479501	Margin	-0.187341	Margin	-1.86106	Unmethy	-2.04241	Unmethy	-2.16081
cg07673089	11	564474	LOC143666	NR_026967	Body	N_Shore	SLE	Methy	1.21633	Methy	1.34194	Margin	0.686865	Methy	1.51271	Methy	1.83822	Methy	1.53673	Methy	1.73957	Methy	1.45811	Methy	1.22407	Margin	-0.389516
cg12813709	11	566467	PHRF1;LOC143666	NM_020901;NR_026967	TSS200;TSS1500	Island	SLE	Margin	-1.37949	Unmethy	-1.74049	Unmethy	-1.71239	Margin	-1.58818	Margin	-1.67246	Margin	-1.49788	Margin	-1.44261	Margin	-1.4902	Unmethy	-1.74433	Unmethy	-1.61304
cg25535316	11	569198	PHRF1	NM_020901	5'UTR	S_Shelf	SLE	Methy	2.38584	Methy	1.68401	Methy	1.57965	Margin	-0.962432	Methy	1.862	Methy	2.07504	Methy	3.06394	Methy	3.06658	Methy	2.90395	Methy	2.86004
cg02304370	11	577926	PHRF1	NM_020901	Body	N_Shore	SLE	Margin	0.0174281	Margin	0.13086	Margin	-0.810914	Margin	-0.965999	Methy	1.03415	Methy	3.25501	Margin	-0.175307	Margin	-0.224805	Margin	-0.215536	Margin	-1.08043
cg03610629	11	601114	PHRF1	NM_020901	Body	N_Shore	SLE	Methy	6.10613	Unmethy	6.37224	Unmethy	6.16985	Unmethy	6.33671	Unmethy	6.16789	Methy	6.44861	Methy	6.18009	Methy	6.81957	Methy	5.83986	Unmethy	6.45135
cg02719427	11	2108301	INS-IGF2;IGF2;IGF2;IGF2	NR_003512;NM_001007139;NM_000612;NM_001127598	Body;3'UTR;3'UTR;3'UTR	N_Shelf	T1D	Methy	5.957	Methy	5.64704	Methy	5.63748	Methy	5.40612	Methy	5.1042	Methy	5.86781	Methy	5.86616	Methy	5.89772	Margin	6.11032	Methy	6.11131
cg00221747	11	2109004	INS-IGF2;IGF2;IGF2;IGF2	NR_003512;NM_001007139;NM_000612;NM_001127598	Body;3'UTR;3'UTR;3'UTR	N_Shore	T1D	Methy	6.50198	Unmethy	6.90735	Unmethy	6.99452	Unmethy	6.781	Unmethy	6.81306	Methy	6.7981	Methy	6.46107	Methy	6.90322	Unmethy	6.7779	Unmethy	6.42982
cg12528452	11	2110650	INS-IGF2;IGF2;IGF2;IGF2	NR_003512;NM_001007139;NM_000612;NM_001127598	Body;3'UTR;3'UTR;3'UTR	Island	T1D	Methy	1.11604	Methy	1.29648	Methy	1.32024	Methy	1.03768	Margin	0.741828	Methy	1.49978	Methy	1.08323	Methy	0.995164	Methy	1.3084	Methy	1.40429
cg02613624	11	2110962	INS-IGF2;IGF2;IGF2;IGF2	NR_003512;NM_001127598;NM_000612;NM_001007139	Body;Body;Body;Body	Island	T1D	Margin	0.664528	Margin	0.859724	Margin	0.726277	Margin	0.646136	Margin	0.756861	Margin	0.911599	Methy	0.772327	Methy	0.69173	Margin	0.837225	Margin	0.816197
cg14890224	11	2113270	MIR483;INS-IGF2;IGF2;IGF2;IGF2	NR_030158;NR_003512;NM_001127598;NM_000612;NM_001007139	TSS1500;Body;Body;Body;Body	N_Shelf	T1D	Methy	1.02182	Margin	0.86136	Margin	0.785799	Margin	0.450635	Margin	0.441025	Margin	0.502017	Methy	1.18221	Methy	0.999519	Methy	1.10577	Methy	1.12455
cg20895511	11	2116631	INS-IGF2;IGF2;IGF2;IGF2;IGF2	NR_003512;NM_001127598;NM_000612;NM_001007139;NM_000612	Body;Body;5'UTR;5'UTR;1stExon	Island	T1D	Margin	-1.50753	Unmethy	-1.77977	Unmethy	-1.68899	Margin	-1.75745	Margin	-1.88513	Margin	-1.71613	Margin	-1.70778	Margin	-1.73724	Unmethy	-1.8171	Unmethy	-1.84169
cg03760951	11	2117451	INS-IGF2;IGF2AS;IGF2;IGF2;IGF2AS;IGF2	NR_003512;NR_028044;NM_001127598;NM_001007139;NR_028043;NM_000612	Body;TSS1500;Body;5'UTR;TSS1500;TSS1500	Island	T1D	Unmethy	-2.30019	Unmethy	-2.19724	Unmethy	-2.24637	Margin	-1.41932	Unmethy	-2.01668	Margin	-1.17935	Unmethy	-2.97237	Unmethy	-2.88477	Unmethy	-3.05181	Unmethy	-3.03937
cg20339650	11	2117458	INS-IGF2;IGF2AS;IGF2;IGF2;IGF2AS;IGF2	NR_003512;NR_028044;NM_001127598;NM_001007139;NR_028043;NM_000612	Body;TSS1500;Body;5'UTR;TSS1500;TSS1500	Island	T1D	Margin	-1.80069	Margin	-1.72624	Unmethy	-1.78666	Margin	-1.60832	Margin	-1.50361	Margin	-1.26928	Unmethy	-2.21633	Unmethy	-2.20652	Unmethy	-2.20621	Unmethy	-2.16049
cg24917382	11	2117529	INS-IGF2;IGF2AS;IGF2;IGF2;IGF2AS;IGF2	NR_003512;NR_028044;NM_001127598;NM_001007139;NR_028043;NM_000612	Body;TSS1500;Body;5'UTR;TSS1500;TSS1500	Island	T1D	Margin	-1.86337	Unmethy	-1.79118	Unmethy	-1.75082	Margin	-1.68978	Margin	-1.69276	Margin	-1.62322	Unmethy	-2.24408	Unmethy	-2.24424	Unmethy	-2.07784	Unmethy	-2.13228
cg05452899	11	2117709	INS-IGF2;IGF2AS;IGF2;IGF2;IGF2AS;IGF2	NR_003512;NR_028044;NM_001127598;NM_001007139;NR_028043;NM_000612	Body;TSS1500;Body;5'UTR;TSS1500;TSS1500	Island	T1D	Unmethy	-2.20993	Unmethy	-2.1145	Unmethy	-2.08614	Margin	-1.95809	Unmethy	-1.97333	Margin	-1.6809	Unmethy	-2.57185	Unmethy	-2.65246	Unmethy	-2.66122	Unmethy	-2.67232
cg17037101	11	2117890	INS-IGF2;IGF2AS;IGF2;IGF2;IGF2AS;IGF2	NR_003512;NR_028044;NM_001127598;NM_001007139;NR_028043;NM_000612	Body;TSS1500;Body;5'UTR;TSS1500;TSS1500	Island	T1D	Unmethy	-3.37402	Unmethy	-3.09773	Unmethy	-3.08065	Margin	-2.01541	Unmethy	-2.38632	Unmethy	-2.09904	Unmethy	-3.87682	Unmethy	-4.08096	Unmethy	-3.97444	Unmethy	-3.96678
cg23676551	11	2117950	INS-IGF2;IGF2AS;IGF2;IGF2;IGF2AS;IGF2	NR_003512;NR_028044;NM_001127598;NM_001007139;NR_028043;NM_000612	Body;TSS1500;Body;5'UTR;TSS1500;TSS1500	Island	T1D	Unmethy	-2.57148	Unmethy	-2.2465	Unmethy	-2.19202	Margin	-1.49793	Margin	-1.76069	Margin	-1.52957	Unmethy	-2.83107	Unmethy	-2.97399	Unmethy	-2.74616	Unmethy	-2.93623
cg15393937	11	2117959	INS-IGF2;IGF2AS;IGF2;IGF2;IGF2AS;IGF2	NR_003512;NR_028044;NM_001127598;NM_001007139;NR_028043;NM_000612	Body;TSS1500;Body;5'UTR;TSS1500;TSS1500	Island	T1D	Unmethy	-2.04274	Unmethy	-1.75089	Unmethy	-1.65776	Margin	-0.969313	Margin	-1.2888	Margin	-1.14506	Unmethy	-2.80551	Unmethy	-2.85077	Unmethy	-2.72809	Unmethy	-3.07326
cg23905216	11	2117966	INS-IGF2;IGF2AS;IGF2;IGF2;IGF2AS;IGF2	NR_003512;NR_028044;NM_001127598;NM_001007139;NR_028043;NM_000612	Body;TSS1500;Body;5'UTR;TSS1500;TSS1500	Island	T1D	Margin	-1.72862	Margin	-1.5152	Margin	-1.48414	Margin	-1.43431	Margin	-1.45131	Margin	-1.2284	Unmethy	-1.99271	Margin	-1.90534	Unmethy	-1.99533	Unmethy	-1.97811
cg19443075	11	2117979	INS-IGF2;IGF2AS;IGF2;IGF2;IGF2AS;IGF2	NR_003512;NR_028044;NM_001127598;NM_001007139;NR_028043;NM_000612	Body;TSS1500;Body;5'UTR;TSS1500;TSS1500	Island	T1D	Margin	-1.85119	Unmethy	-1.7417	Margin	-1.61286	Margin	-1.20431	Margin	-1.30247	Margin	-1.5019	Unmethy	-2.17047	Unmethy	-2.05905	Unmethy	-2.09405	Unmethy	-2.24283
cg22287492	11	2117987	INS-IGF2;IGF2AS;IGF2;IGF2;IGF2AS;IGF2	NR_003512;NR_028044;NM_001127598;NM_001007139;NR_028043;NM_000612	Body;TSS1500;Body;5'UTR;TSS1500;TSS1500	Island	T1D	Margin	-1.77349	Margin	-1.49771	Margin	-1.44111	Margin	-1.02313	Margin	-1.14144	Margin	-0.946382	Unmethy	-2.1036	Unmethy	-2.07475	Unmethy	-2.04377	Unmethy	-2.09061
cg10659464	11	2118021	INS-IGF2;IGF2AS;IGF2;IGF2;IGF2AS;IGF2	NR_003512;NR_028044;NM_001127598;NM_001007139;NR_028043;NM_000612	Body;TSS1500;Body;5'UTR;TSS1500;TSS1500	Island	T1D	Margin	-1.75146	Margin	-1.48211	Unmethy	-1.67048	Margin	-1.52814	Margin	-1.61933	Margin	-1.50882	Unmethy	-1.92434	Unmethy	-1.92753	Unmethy	-1.81848	Unmethy	-1.77928
cg02835822	11	2118032	INS-IGF2;IGF2AS;IGF2;IGF2;IGF2AS;IGF2	NR_003512;NR_028044;NM_001127598;NM_001007139;NR_028043;NM_000612	Body;TSS1500;Body;5'UTR;TSS1500;TSS1500	Island	T1D	Unmethy	-2.11724	Unmethy	-1.98966	Unmethy	-2.04596	Margin	-1.99501	Unmethy	-1.99326	Unmethy	-1.78329	Unmethy	-2.41753	Unmethy	-2.30867	Unmethy	-2.38901	Unmethy	-2.4544
cg04072545	11	2118057	INS-IGF2;IGF2AS;IGF2;IGF2;IGF2AS;IGF2	NR_003512;NR_028044;NM_001127598;NM_001007139;NR_028043;NM_000612	Body;TSS1500;Body;5'UTR;TSS1500;TSS1500	Island	T1D	Unmethy	-2.01153	Unmethy	-1.79618	Margin	-1.56798	Unmethy	-2.07252	Unmethy	-2.02177	Margin	-1.72525	Unmethy	-2.58662	Unmethy	-2.04633	Unmethy	-2.00363	Unmethy	-2.24695
cg14188639	11	2118120	INS-IGF2;IGF2AS;IGF2;IGF2;IGF2AS;IGF2	NR_003512;NR_028044;NM_001007139;NM_001127598;NR_028043;NM_000612	Body;TSS1500;5'UTR;5'UTR;TSS1500;TSS1500	Island	T1D	Unmethy	-2.08239	Unmethy	-1.89486	Unmethy	-1.80177	Margin	-1.892	Margin	-1.55895	Margin	-1.53391	Unmethy	-2.29549	Unmethy	-2.27815	Unmethy	-2.22019	Unmethy	-2.29921
cg13791131	11	2118468	IGF2AS;INS-IGF2;IGF2;IGF2;IGF2AS	NR_028044;NR_003512;NM_001007139;NM_001127598;NR_028043	Body;Body;5'UTR;5'UTR;Body	Island	T1D	Unmethy	-2.43776	Unmethy	-2.25562	Unmethy	-2.28183	Unmethy	-2.11703	Unmethy	-2.23218	Margin	-1.62885	Unmethy	-2.97845	Unmethy	-2.83309	Unmethy	-2.70157	Unmethy	-2.99453
cg25574024	11	2118470	IGF2AS;INS-IGF2;IGF2;IGF2;IGF2AS	NR_028044;NR_003512;NM_001007139;NM_001127598;NR_028043	Body;Body;5'UTR;5'UTR;Body	Island	T1D	Unmethy	-2.38674	Unmethy	-2.30998	Unmethy	-2.30663	Unmethy	-2.09124	Unmethy	-2.09201	Margin	-1.67806	Unmethy	-3.00907	Unmethy	-2.97419	Unmethy	-2.84164	Unmethy	-2.85335
cg24047810	11	2118917	IGF2AS;INS-IGF2;IGF2;IGF2AS;IGF2	NR_028044;NR_003512;NM_001007139;NR_028043;NM_001127598	Body;Body;5'UTR;Body;TSS200	Island	T1D	Margin	-1.34585	Margin	-1.25729	Margin	-1.09587	Margin	-0.766706	Margin	-0.876974	Margin	-0.759822	Margin	-1.70804	Margin	-1.6605	Unmethy	-1.64903	Unmethy	-1.67896
cg05444816	11	2118982	IGF2AS;INS-IGF2;IGF2;IGF2AS;IGF2	NR_028044;NR_003512;NM_001007139;NR_028043;NM_001127598	Body;Body;5'UTR;Body;TSS200	Island	T1D	Unmethy	-2.64405	Unmethy	-2.29997	Unmethy	-2.49054	Margin	-2.01338	Margin	-1.85051	Unmethy	-1.82159	Unmethy	-2.93638	Unmethy	-2.97269	Unmethy	-2.85807	Unmethy	-3.02001
cg01368777	11	2119059	IGF2AS;INS-IGF2;IGF2;IGF2AS;IGF2	NR_028044;NR_003512;NM_001007139;NR_028043;NM_001127598	Body;Body;5'UTR;Body;TSS200	Island	T1D	Margin	-1.75625	Unmethy	-1.80744	Unmethy	-1.80359	Margin	-1.89146	Margin	-1.83569	Margin	-1.5519	Unmethy	-2.08809	Unmethy	-1.94464	Unmethy	-1.92676	Unmethy	-1.88382
cg21237591	11	2119086	IGF2AS;INS-IGF2;IGF2;IGF2AS;IGF2	NR_028044;NR_003512;NM_001007139;NR_028043;NM_001127598	Body;Body;5'UTR;Body;TSS200	S_Shore	T1D	Margin	-1.64976	Margin	-1.27085	Margin	-1.40781	Margin	-1.14994	Margin	-1.2201	Margin	-1.10912	Margin	-1.67903	Margin	-1.80618	Unmethy	-1.77197	Unmethy	-1.79743
cg22225943	11	2119112	IGF2AS;INS-IGF2;IGF2;IGF2AS;IGF2	NR_028044;NR_003512;NM_001007139;NR_028043;NM_001127598	Body;Body;5'UTR;Body;TSS200	S_Shore	T1D	Margin	-1.58996	Margin	-1.62216	Margin	-1.49658	Margin	-1.4166	Margin	-1.43267	Margin	-1.38916	Margin	-1.84133	Margin	-1.86273	Unmethy	-1.85614	Unmethy	-1.76052
cg08014499	11	2119121	IGF2AS;INS-IGF2;IGF2;IGF2;IGF2AS	NR_028044;NR_003512;NM_001007139;NM_001127598;NR_028043	Body;Body;5'UTR;TSS1500;Body	S_Shore	T1D	Margin	-1.47411	Margin	-1.31692	Margin	-1.40405	Margin	-1.17307	Margin	-1.25194	Margin	-1.22722	Margin	-1.69729	Margin	-1.75801	Unmethy	-1.59929	Unmethy	-1.6424
cg05203776	11	2119158	IGF2AS;INS-IGF2;IGF2;IGF2;IGF2AS	NR_028044;NR_003512;NM_001007139;NM_001127598;NR_028043	Body;Body;5'UTR;TSS1500;Body	S_Shore	T1D	Margin	-1.82316	Unmethy	-1.83414	Unmethy	-1.96642	Margin	-1.97092	Margin	-1.79754	Unmethy	-1.9214	Unmethy	-2.02215	Margin	-1.86809	Unmethy	-1.92615	Unmethy	-1.9195
cg27263998	11	2127583	IGF2;INS-IGF2;INS-IGF2	NM_001007139;NR_003512;NM_001042376	TSS200;Body;Body	NA	T1D	Margin	0.637632	Margin	0.379306	Margin	0.056248	Margin	-0.435446	Margin	-0.440948	Margin	0.226958	Methy	0.758657	Methy	0.702976	Margin	0.531228	Margin	0.73513
cg01921126	11	2127602	IGF2;INS-IGF2;INS-IGF2	NM_001007139;NR_003512;NM_001042376	TSS200;Body;Body	NA	T1D	Methy	1.16654	Margin	0.979779	Margin	0.646873	Margin	0.121139	Margin	0.244505	Margin	0.961465	Methy	1.12652	Methy	1.22381	Methy	1.24887	Methy	1.39987
cg14432744	11	2128619	INS-IGF2;IGF2;INS-IGF2	NR_003512;NM_001007139;NM_001042376	Body;TSS1500;Body	NA	T1D	Margin	0.871534	Margin	0.872492	Margin	0.887186	Margin	0.673287	Margin	0.818504	Margin	0.863657	Methy	0.858965	Methy	0.765783	Margin	0.809645	Methy	0.875389
cg24439505	11	2128674	INS-IGF2;IGF2;INS-IGF2	NR_003512;NM_001007139;NM_001042376	Body;TSS1500;Body	NA	T1D	Methy	1.0177	Methy	1.20946	Methy	1.14274	Methy	0.941384	Methy	1.04728	Margin	0.763489	Methy	1.26594	Methy	1.22106	Methy	1.20131	Methy	1.34673
cg04057455	11	2128744	INS-IGF2;IGF2;INS-IGF2	NR_003512;NM_001007139;NM_001042376	Body;TSS1500;Body	NA	T1D	Margin	0.269834	Margin	0.223338	Margin	-0.0398245	Margin	-0.309207	Margin	-0.379991	Margin	-0.0557764	Methy	0.668738	Margin	0.4486	Margin	0.604978	Margin	0.63138
cg04484994	11	2137615	INS-IGF2;INS-IGF2;INS	NR_003512;NM_001042376;NM_000207	Body;Body;3'UTR	S_Shelf	T1D	Methy	1.02213	Methy	1.02391	Margin	0.933995	Margin	0.708978	Margin	0.901449	Margin	0.895491	Methy	1.11184	Methy	1.04383	Methy	1.14947	Methy	1.05537
cg19297427	11	2138171	INS-IGF2;INS-IGF2;INS	NR_003512;NM_001042376;NM_000207	Body;Body;Body	NA	T1D	Methy	0.969643	Margin	0.735887	Margin	0.520335	Margin	0.372065	Margin	0.445587	Margin	0.688271	Methy	1.45056	Methy	1.28524	Methy	1.36228	Methy	1.34123
cg13993218	11	2138442	INS-IGF2;INS-IGF2;INS	NR_003512;NM_001042376;NM_000207	Body;Body;Body	NA	T1D	Methy	1.37603	Methy	1.09044	Margin	0.704353	Margin	0.210252	Margin	0.348959	Margin	0.959664	Methy	1.61023	Methy	1.57216	Methy	1.77347	Methy	1.68107
cg25336198	11	2139194	INS-IGF2;INS;INS-IGF2	NM_001042376;NM_000207;NR_003512	TSS200;TSS200;TSS200	NA	T1D	Margin	0.491584	Margin	0.478282	Margin	0.0750135	Margin	-0.187728	Margin	-0.050343	Margin	0.195906	Methy	0.957662	Methy	0.716468	Margin	0.89019	Methy	0.991695
cg16711450	11	2140081	INS;INS-IGF2;INS-IGF2	NM_000207;NR_003512;NM_001042376	TSS1500;TSS1500;TSS1500	N_Shelf	T1D	Methy	1.36384	Methy	1.30387	Methy	0.991171	Margin	0.634858	Margin	0.701029	Margin	1.12306	Methy	1.85798	Methy	1.74825	Methy	1.84165	Methy	2.01278
cg25150846	11	2146167	TH;TH;TH	NM_199292;NM_199293;NM_000360	Body;Body;Body	S_Shore	T1D	Methy	5.73169	Margin	5.82926	Methy	5.64486	Margin	5.65896	Methy	5.53278	Methy	5.52924	Methy	5.51328	Methy	5.6117	Methy	5.912	Methy	5.59285
cg23042775	11	2146206	TH;TH;TH	NM_199292;NM_199293;NM_000360	Body;Body;Body	S_Shore	T1D	Margin	0.681433	Margin	0.853784	Margin	0.794873	Margin	0.409211	Margin	0.392304	Margin	0.701502	Methy	1.08082	Methy	0.935906	Methy	1.16576	Methy	1.09685
cg14714364	11	2148182	TH;TH;TH	NM_199292;NM_199293;NM_000360	Body;Body;Body	S_Shelf	T1D	Methy	1.33539	Methy	1.3444	Methy	1.11484	Margin	0.818215	Methy	1.02741	Methy	1.36121	Methy	1.67106	Methy	1.7256	Methy	1.81249	Methy	1.85244
cg25011257	11	2149763	TH;TH;TH	NM_199293;NM_199292;NM_000360	TSS200;TSS200;TSS200	NA	T1D	Margin	0.854684	Methy	1.00681	Margin	0.934979	Margin	0.689946	Margin	0.825238	Margin	1.07811	Methy	1.04905	Methy	0.973732	Methy	0.957484	Methy	1.04967
cg04204669	11	2150318	TH;TH;TH	NM_000360;NM_199293;NM_199292	TSS1500;TSS1500;TSS1500	NA	T1D	Methy	1.09025	Margin	0.951582	Margin	0.746892	Margin	0.363192	Margin	0.2641	Margin	0.70718	Methy	1.51829	Methy	1.39267	Methy	1.54188	Methy	1.55067
cg23267890	11	2421546	KCNQ1	NM_000218	TSS1500	N_Shore	T2D	Margin	0.82098	Methy	1.26197	Methy	1.55908	Methy	1.86311	Methy	1.17437	Methy	1.24423	Margin	0.500741	Margin	0.631202	Margin	0.651995	Margin	0.618517
cg15932136	11	2421604	KCNQ1	NM_000218	TSS1500	N_Shore	T2D	Methy	1.04942	Methy	1.38415	Methy	1.54988	Methy	1.73501	Methy	1.258	Margin	1.11812	Methy	0.8845	Methy	0.84283	Methy	0.925973	Methy	0.911252
cg11363972	11	2421825	KCNQ1	NM_000218	TSS1500	Island	T2D	Margin	0.69269	Methy	1.13691	Methy	2.1168	Methy	2.16334	Methy	1.14444	Margin	1.04716	Margin	0.395138	Margin	0.53473	Margin	0.518	Margin	0.542777
cg04104132	11	2422016	KCNQ1	NM_000218	TSS1500	Island	T2D	Margin	-1.17464	Margin	-0.835876	Margin	-0.744269	Margin	-0.662702	Margin	-0.949769	Margin	-0.8366	Margin	-1.55143	Margin	-1.53097	Unmethy	-1.56413	Unmethy	-1.5534
cg19779211	11	2422067	KCNQ1	NM_000218	TSS1500	Island	T2D	Margin	-1.839	Margin	-1.63227	Unmethy	-1.66191	Margin	-1.27907	Margin	-1.54749	Margin	-1.5218	Unmethy	-2.20688	Unmethy	-2.18039	Unmethy	-2.20402	Unmethy	-2.30082
cg12578166	11	2423485	KCNQ1	NM_000218	Body	S_Shore	T2D	Margin	-1.82704	Unmethy	-2.06714	Unmethy	-3.04169	Unmethy	-2.89039	Unmethy	-2.08773	Unmethy	-1.82765	Unmethy	-1.94532	Margin	-1.76364	Unmethy	-1.6794	Unmethy	-1.73152
cg27115973	11	2437782	KCNQ1;KCNQ1	NM_181798;NM_000218	TSS1500;Body	NA	T2D	Methy	2.67753	Methy	2.1328	Methy	2.54635	Margin	0.850932	Margin	-0.102589	Methy	1.31132	Methy	3.08562	Methy	3.07073	Methy	3.16646	Methy	2.54722
cg03170016	11	2438718	KCNQ1;KCNQ1	NM_181798;NM_000218	TSS1500;Body	NA	T2D	Methy	1.65951	Methy	1.74422	Methy	1.75405	Methy	1.27563	Methy	1.45845	Margin	0.851279	Methy	1.9381	Methy	1.74676	Methy	1.77931	Methy	1.45747
cg07618453	11	2458757	KCNQ1;KCNQ1	NM_000218;NM_181798	Body;Body	NA	T2D	Unmethy	-2.04202	Margin	-1.17442	Margin	-0.225249	Margin	-0.563	Margin	-1.83234	Unmethy	-2.27366	Unmethy	-3.29481	Unmethy	-2.98324	Unmethy	-3.14881	Unmethy	-3.27282
cg19670883	11	2458933	KCNQ1;KCNQ1	NM_000218;NM_181798	Body;Body	NA	T2D	Margin	-1.74788	Margin	-0.719002	Margin	0.463648	Margin	0.244441	Margin	-1.52676	Unmethy	-1.80236	Unmethy	-3.06919	Unmethy	-2.85642	Unmethy	-3.07421	Unmethy	-3.31909
cg23272088	11	2461389	KCNQ1;KCNQ1	NM_000218;NM_181798	Body;Body	NA	T2D	Methy	3.32247	Methy	3.30196	Methy	3.73301	Methy	2.5911	Methy	2.73855	Methy	3.49986	Methy	4.09896	Methy	3.64687	Methy	2.41562	Margin	0.253208
cg17229197	11	2499264	KCNQ1;KCNQ1	NM_000218;NM_181798	Body;Body	NA	T2D	Methy	3.0219	Methy	3.0701	Methy	3.59721	Methy	3.00504	Methy	2.89833	Margin	0.834763	Methy	3.57417	Methy	3.0525	Methy	3.11644	Methy	2.90595
cg12949760	11	2499438	KCNQ1;KCNQ1	NM_000218;NM_181798	Body;Body	NA	T2D	Margin	-0.23987	Margin	0.655697	Methy	1.67087	Methy	1.19111	Methy	1.10455	Margin	-0.107099	Margin	0.0688941	Margin	-1.65939	Unmethy	-1.85145	Unmethy	-2.53144
cg05623526	11	2504895	KCNQ1;KCNQ1	NM_000218;NM_181798	Body;Body	NA	T2D	Unmethy	-2.20594	Margin	-1.53458	Margin	-1.05968	Margin	-1.01636	Unmethy	-1.99722	Unmethy	-3.5259	Unmethy	-3.42615	Unmethy	-2.97841	Unmethy	-3.31679	Unmethy	-3.16187
cg16465939	11	2510986	KCNQ1;KCNQ1	NM_000218;NM_181798	Body;Body	N_Shore	T2D	Margin	-1.3114	Margin	-0.736176	Margin	0.0411477	Margin	-0.955663	Margin	-1.28519	Margin	-1.03435	Unmethy	-2.39583	Unmethy	-2.43132	Unmethy	-2.68436	Unmethy	-3.183
cg27491887	11	2511159	KCNQ1;KCNQ1	NM_000218;NM_181798	Body;Body	N_Shore	T2D	Unmethy	-2.16115	Unmethy	-1.73471	Margin	-0.977825	Unmethy	-2.26098	Unmethy	-3.01577	Unmethy	-2.28816	Unmethy	-3.75206	Unmethy	-3.31126	Unmethy	-3.65947	Unmethy	-3.79574
cg18729298	11	2511779	KCNQ1;KCNQ1	NM_000218;NM_181798	Body;Body	N_Shore	T2D	Margin	-1.64956	Margin	-1.16489	Margin	-0.0379867	Margin	-1.48773	Unmethy	-2.49066	Unmethy	-2.64929	Unmethy	-4.45107	Unmethy	-3.48617	Unmethy	-4.40543	Unmethy	-5.21697
cg07824422	11	2511982	KCNQ1;KCNQ1	NM_000218;NM_181798	Body;Body	Island	T2D	Margin	-0.260922	Margin	0.49112	Methy	1.77294	Methy	1.48423	Margin	0.316687	Margin	0.313004	Margin	-1.32058	Margin	-1.20938	Margin	-1.42613	Margin	-1.40187
cg02258534	11	2512073	KCNQ1;KCNQ1	NM_000218;NM_181798	Body;Body	Island	T2D	Margin	0.516082	Margin	0.985786	Methy	1.9144	Methy	1.50078	Methy	1.01478	Margin	1.0004	Margin	0.18328	Margin	0.16781	Margin	0.325121	Margin	0.200898
cg03905757	11	2522769	KCNQ1;KCNQ1	NM_000218;NM_181798	Body;Body	NA	T2D	Methy	2.35437	Methy	2.09744	Methy	2.15537	Margin	0.817882	Margin	0.774027	Methy	2.28517	Methy	2.79464	Methy	2.68929	Methy	2.8352	Methy	2.77525
cg08920458	11	2541493	KCNQ1;KCNQ1	NM_000218;NM_181798	Body;Body	NA	T2D	Methy	6.54717	Unmethy	6.1002	Margin	6.0422	Unmethy	6.03224	Unmethy	5.89396	Methy	6.36089	Methy	6.20085	Methy	6.29604	Methy	6.00865	Methy	6.1247
cg13145504	11	2551416	KCNQ1;KCNQ1	NM_000218;NM_181798	Body;Body	N_Shore	T2D	Methy	1.58121	Methy	1.41889	Methy	1.38557	Margin	0.464508	Margin	0.502421	Methy	1.37416	Methy	2.25746	Methy	1.93135	Methy	2.04384	Methy	2.1619
cg14089425	11	2573410	KCNQ1;KCNQ1	NM_000218;NM_181798	Body;Body	NA	T2D	Methy	3.0078	Methy	2.2775	Methy	2.56641	Methy	1.28001	Margin	0.830393	Methy	2.20298	Methy	3.75695	Methy	3.06804	Methy	2.92063	Methy	3.53119
cg07556018	11	2633917	KCNQ1;KCNQ1OT1;KCNQ1	NM_000218;NR_002728;NM_181798	Body;Body;Body	NA	T2D	Margin	-0.299649	Margin	0.675701	Methy	1.82669	Methy	1.59351	Margin	0.586867	Margin	0.758871	Margin	-1.24363	Margin	-1.43046	Margin	-1.12185	Margin	-0.675327
cg13428066	11	2634344	KCNQ1;KCNQ1OT1;KCNQ1	NM_000218;NR_002728;NM_181798	Body;Body;Body	NA	T2D	Margin	-0.554478	Margin	0.437082	Methy	1.68428	Methy	1.60838	Margin	0.0228269	Margin	0.00873803	Margin	-1.77765	Margin	-1.80673	Unmethy	-1.71181	Margin	-1.14126
cg15422307	11	2650079	KCNQ1;KCNQ1OT1;KCNQ1	NM_000218;NR_002728;NM_181798	Body;Body;Body	NA	T2D	Methy	1.89352	Methy	1.8509	Methy	1.52739	Methy	0.980157	Margin	0.58057	Methy	1.91902	Methy	2.56657	Methy	2.14198	Methy	2.25937	Methy	2.35277
cg06294475	11	2655199	KCNQ1;KCNQ1OT1;KCNQ1	NM_000218;NR_002728;NM_181798	Body;Body;Body	NA	T2D	Margin	-0.528351	Margin	0.455272	Methy	1.73705	Methy	1.85115	Methy	1.40095	Margin	-1.57378	Unmethy	-3.03204	Unmethy	-2.57061	Unmethy	-3.08059	Unmethy	-3.29327
cg03411938	11	2656579	KCNQ1;KCNQ1OT1;KCNQ1	NM_000218;NR_002728;NM_181798	Body;Body;Body	NA	T2D	Margin	0.828451	Methy	1.13981	Methy	1.46794	Methy	1.29575	Methy	1.01055	Methy	1.73519	Margin	0.582969	Margin	0.442555	Margin	0.275346	Margin	-0.996695
cg20406758	11	2659704	KCNQ1;KCNQ1OT1;KCNQ1	NM_000218;NR_002728;NM_181798	Body;Body;Body	NA	T2D	Methy	2.36466	Methy	2.38671	Methy	3.45196	Methy	3.39537	Methy	2.93182	Margin	0.628271	Methy	1.14965	Methy	2.258	Methy	1.91903	Margin	0.841718
cg08160246	11	2666490	KCNQ1;KCNQ1OT1;KCNQ1	NM_000218;NR_002728;NM_181798	Body;Body;Body	NA	T2D	Methy	1.39074	Methy	1.401	Methy	1.84538	Methy	1.18188	Methy	1.23093	Margin	-0.362404	Methy	1.98392	Methy	1.62013	Methy	1.69171	Methy	1.46511
cg02180189	11	2667062	KCNQ1;KCNQ1OT1;KCNQ1	NM_000218;NR_002728;NM_181798	Body;Body;Body	NA	T2D	Methy	1.66374	Methy	1.54013	Methy	1.50488	Methy	1.03843	Margin	0.256599	Margin	0.670583	Methy	2.4785	Methy	2.09783	Methy	2.0146	Methy	1.52136
cg11342234	11	2667414	KCNQ1;KCNQ1OT1;KCNQ1	NM_000218;NR_002728;NM_181798	Body;Body;Body	NA	T2D	Margin	0.801494	Methy	1.32092	Methy	2.13986	Methy	2.08088	Methy	2.04358	Margin	-1.5039	Methy	1.61344	Margin	0.67783	Margin	0.688803	Margin	0.624808
cg25204743	11	2672413	KCNQ1;KCNQ1OT1;KCNQ1	NM_000218;NR_002728;NM_181798	Body;Body;Body	NA	T2D	Methy	1.13196	Methy	1.271	Methy	2.16912	Methy	1.39648	Methy	1.06953	Margin	-0.772401	Methy	1.2386	Methy	0.962237	Margin	0.873734	Margin	0.807842
cg27119222	11	2676805	KCNQ1;KCNQ1OT1;KCNQ1	NM_000218;NR_002728;NM_181798	Body;Body;Body	N_Shore	T2D	Methy	1.03238	Methy	1.28015	Methy	1.09056	Margin	0.88916	Margin	0.972736	Margin	1.0873	Methy	0.890647	Methy	0.898624	Methy	1.02566	Methy	1.13876
cg11297256	11	2677386	KCNQ1;KCNQ1OT1;KCNQ1	NM_000218;NR_002728;NM_181798	Body;Body;Body	Island	T2D	Margin	0.56924	Margin	0.656163	Margin	0.648192	Margin	0.75529	Margin	0.786227	Margin	0.767032	Methy	0.731668	Margin	0.552867	Margin	0.694186	Margin	0.607198
cg01873334	11	2678208	KCNQ1OT1;KCNQ1;KCNQ1	NR_002728;NM_000218;NM_181798	TSS1500;Body;Body	Island	T2D	Margin	0.646449	Margin	0.819771	Margin	0.723599	Margin	0.821941	Margin	0.897921	Margin	0.905487	Methy	0.852177	Methy	0.78098	Margin	0.816346	Methy	0.880873
cg05740879	11	2678442	KCNQ1OT1;KCNQ1;KCNQ1	NR_002728;NM_000218;NM_181798	TSS1500;Body;Body	Island	T2D	Margin	0.659514	Margin	0.965608	Margin	0.76189	Margin	0.620507	Margin	0.924482	Margin	0.937096	Methy	0.722765	Methy	0.754156	Margin	0.785174	Margin	0.848044
cg27604721	11	2678834	KCNQ1OT1;KCNQ1;KCNQ1	NR_002728;NM_000218;NM_181798	TSS1500;Body;Body	S_Shore	T2D	Margin	0.741733	Margin	0.89725	Methy	1.32865	Margin	0.893662	Margin	0.558307	Margin	0.634696	Margin	0.438234	Margin	0.437795	Margin	0.477359	Margin	0.445988
cg01744331	11	2678934	KCNQ1OT1;KCNQ1;KCNQ1	NR_002728;NM_000218;NM_181798	TSS1500;Body;Body	S_Shore	T2D	Methy	3.71786	Methy	4.07675	Methy	5.42316	Unmethy	5.79574	Methy	5.26997	Methy	1.71693	Methy	3.37251	Methy	3.25403	Methy	2.90214	Methy	2.79628
cg16556677	11	2678977	KCNQ1OT1;KCNQ1;KCNQ1	NR_002728;NM_000218;NM_181798	TSS1500;Body;Body	S_Shore	T2D	Methy	1.93192	Methy	2.36159	Methy	2.93201	Methy	2.98009	Methy	2.86581	Margin	1.13917	Methy	1.95468	Methy	1.78749	Methy	1.74624	Methy	1.46123
cg06603309	11	2680720	KCNQ1;KCNQ1	NM_000218;NM_181798	Body;Body	S_Shelf	T2D	Methy	3.00332	Methy	2.24553	Methy	5.1046	Methy	4.49168	Methy	3.70477	Margin	-0.158235	Methy	4.65634	Methy	5.19904	Methy	5.45992	Methy	5.13501
cg07592519	11	2691677	KCNQ1;KCNQ1	NM_000218;NM_181798	Body;Body	NA	T2D	Methy	5.343	Margin	5.86102	Methy	5.59268	Methy	5.4772	Methy	5.38713	Methy	5.62118	Methy	5.44368	Methy	5.54343	Methy	5.40491	Methy	5.80754
cg21592241	11	2691702	KCNQ1;KCNQ1	NM_000218;NM_181798	Body;Body	NA	T2D	Methy	6.03303	Margin	5.95829	Margin	5.98307	Unmethy	6.09532	Unmethy	6.22775	Methy	6.43382	Methy	5.91725	Methy	6.02311	Methy	5.90746	Margin	6.17807
cg04894537	11	2719747	KCNQ1;KCNQ1	NM_000218;NM_181798	Body;Body	NA	T2D	Margin	-0.853943	Margin	0.119615	Margin	0.884084	Margin	0.361105	Margin	-0.288709	Margin	0.631118	Unmethy	-2.28013	Unmethy	-2.06444	Unmethy	-1.89223	Margin	-1.37472
cg01917852	11	2729335	KCNQ1;KCNQ1	NM_000218;NM_181798	Body;Body	NA	T2D	Methy	2.2121	Methy	2.06362	Methy	1.99394	Margin	0.841004	Methy	0.994779	Methy	1.69575	Methy	3.18589	Methy	2.8201	Methy	2.83243	Methy	2.82952
cg25356736	11	2731598	KCNQ1;KCNQ1	NM_000218;NM_181798	Body;Body	NA	T2D	Margin	0.661506	Methy	1.51228	Methy	2.09885	Methy	1.9529	Methy	1.89491	Methy	2.1427	Margin	0.591143	Margin	0.186777	Margin	0.230221	Margin	0.39082
cg23750514	11	2746994	KCNQ1;KCNQ1	NM_000218;NM_181798	Body;Body	NA	T2D	Methy	1.48497	Methy	1.28593	Methy	1.18478	Margin	0.321298	Margin	0.539	Margin	1.09838	Methy	2.11141	Methy	2.04609	Methy	2.20098	Methy	2.30355
cg05438727	11	2756623	KCNQ1;KCNQ1	NM_000218;NM_181798	Body;Body	NA	T2D	Margin	-0.670641	Margin	-0.0641288	Margin	0.386639	Margin	0.572341	Margin	-0.349771	Margin	-0.750848	Unmethy	-2.35589	Margin	-1.82151	Unmethy	-2.46832	Unmethy	-2.4745
cg06233503	11	2769250	KCNQ1;KCNQ1	NM_000218;NM_181798	Body;Body	Island	T2D	Margin	-1.7581	Margin	-1.38068	Margin	-1.01274	Margin	-1.18748	Margin	-1.5458	Unmethy	-1.81078	Unmethy	-2.24809	Unmethy	-2.20174	Unmethy	-2.03332	Unmethy	-2.11219
cg19728223	11	2769697	KCNQ1;KCNQ1	NM_000218;NM_181798	Body;Body	Island	T2D	Unmethy	-2.57672	Unmethy	-2.05916	Unmethy	-2.25291	Unmethy	-2.27987	Unmethy	-2.43646	Margin	-1.57893	Unmethy	-2.86859	Unmethy	-3.06862	Unmethy	-2.9439	Unmethy	-2.73273
cg03155200	11	2789835	KCNQ1;KCNQ1	NM_000218;NM_181798	Body;Body	NA	T2D	Margin	-0.178711	Methy	1.94395	Methy	3.96064	Methy	4.82531	Methy	3.37815	Methy	3.82552	Unmethy	-2.33607	Unmethy	-2.93708	Unmethy	-2.51307	Unmethy	-1.6463
cg19852660	11	2803257	KCNQ1;KCNQ1	NM_000218;NM_181798	Body;Body	NA	T2D	Methy	1.38019	Methy	1.63777	Methy	2.73912	Methy	2.76147	Methy	1.85139	Methy	2.25502	Margin	0.253072	Methy	1.12033	Methy	1.22819	Methy	1.1497
cg13859639	11	2803292	KCNQ1;KCNQ1	NM_000218;NM_181798	Body;Body	NA	T2D	Margin	-0.119856	Margin	0.590731	Methy	1.8473	Methy	1.78737	Margin	0.951667	Methy	1.2243	Unmethy	-2.417	Margin	-0.779256	Margin	-0.829183	Margin	-0.834615
cg17416793	11	2803508	KCNQ1;KCNQ1	NM_000218;NM_181798	Body;Body	NA	T2D	Margin	0.0349023	Margin	0.868923	Methy	1.98342	Methy	2.38803	Methy	1.32585	Methy	1.36532	Margin	-0.814845	Margin	-0.631847	Margin	-0.681424	Margin	-0.866965
cg17333973	11	2803595	KCNQ1;KCNQ1	NM_000218;NM_181798	Body;Body	NA	T2D	Margin	-0.308318	Margin	0.500301	Methy	1.44503	Methy	1.97678	Methy	1.09675	Margin	0.701171	Margin	-1.23756	Margin	-1.05937	Margin	-1.1475	Margin	-1.42777
cg06485603	11	2803834	KCNQ1;KCNQ1	NM_000218;NM_181798	Body;Body	NA	T2D	Unmethy	-2.32159	Margin	-1.56203	Margin	-0.894421	Margin	-1.09218	Margin	-1.26292	Margin	-1.26337	Unmethy	-3.78181	Unmethy	-3.59473	Unmethy	-3.95552	Unmethy	-4.04768
cg12141659	11	2804038	KCNQ1;KCNQ1	NM_000218;NM_181798	Body;Body	NA	T2D	Margin	-1.19026	Margin	-0.485495	Margin	0.369989	Margin	0.0461982	Margin	-0.431576	Margin	-1.51002	Unmethy	-3.1401	Unmethy	-2.69538	Unmethy	-3.27836	Unmethy	-3.40445
cg10151367	11	2804218	KCNQ1;KCNQ1	NM_000218;NM_181798	Body;Body	NA	T2D	Unmethy	-2.03074	Margin	-1.57657	Margin	-1.02039	Margin	-1.04653	Unmethy	-2.13887	Unmethy	-2.09678	Unmethy	-3.7849	Unmethy	-3.38214	Unmethy	-4.07499	Unmethy	-4.34135
cg21130221	11	2804886	KCNQ1;KCNQ1	NM_000218;NM_181798	Body;Body	NA	T2D	Margin	-0.153254	Margin	0.942358	Methy	2.11736	Methy	2.19856	Methy	1.42109	Margin	0.927328	Margin	-1.30113	Margin	-1.16669	Margin	-1.34837	Unmethy	-1.85682
cg18272633	11	2805068	KCNQ1;KCNQ1	NM_000218;NM_181798	Body;Body	NA	T2D	Methy	1.31127	Methy	1.74102	Methy	2.52453	Methy	2.49659	Methy	2.238	Margin	1.15569	Methy	1.10023	Methy	0.992301	Methy	1.06735	Margin	0.809849
cg14637411	11	2814931	KCNQ1;KCNQ1	NM_000218;NM_181798	Body;Body	NA	T2D	Margin	0.703367	Margin	0.952	Methy	1.29916	Methy	1.10163	Margin	0.827807	Margin	0.975333	Margin	0.639834	Margin	0.567288	Margin	0.691727	Margin	0.521753
cg26896748	11	2817640	KCNQ1;KCNQ1	NM_000218;NM_181798	Body;Body	NA	T2D	Methy	5.99468	Margin	5.95991	Unmethy	6.26529	Margin	5.69547	Methy	5.46726	Methy	5.8112	Methy	6.41738	Methy	6.42757	Margin	6.13199	Methy	6.00347
cg07464423	11	2826049	KCNQ1;KCNQ1	NM_000218;NM_181798	3'UTR;3'UTR	N_Shore	T2D	Methy	1.38115	Methy	1.62801	Methy	1.76467	Margin	0.804498	Margin	0.946949	Methy	1.43795	Methy	2.10603	Methy	1.48281	Methy	1.57786	Methy	1.64485
cg16293569	11	2826784	KCNQ1;KCNQ1	NM_000218;NM_181798	3'UTR;3'UTR	N_Shore	T2D	Margin	0.44894	Margin	0.441666	Margin	0.308835	Margin	-0.263188	Margin	-0.254383	Margin	0.154024	Methy	1.15354	Margin	0.634332	Margin	0.677536	Margin	0.753874
cg01153817	11	17366085	KCNJ11;KCNJ11	NM_000525;NM_001166290	1stExon;5'UTR	Island	T2D	Margin	0.613885	Methy	1.44938	Methy	2.54275	Methy	1.79352	Margin	0.749546	Methy	2.00238	Margin	0.597191	Margin	0.166631	Margin	0.361617	Methy	1.10029
cg11839944	11	17366220	KCNJ11;KCNJ11;KCNJ11	NM_000525;NM_001166290;NM_000525	1stExon;5'UTR;5'UTR	Island	T2D	Methy	6.09498	Unmethy	6.3587	Methy	5.83988	Unmethy	6.40234	Unmethy	6.20654	Methy	5.51884	Methy	5.87289	Methy	5.75032	Methy	5.7114	Methy	5.65291
cg23065768	11	17368288	KCNJ11	NM_001166290	TSS1500	S_Shore	T2D	Margin	0.886238	Methy	1.14618	Methy	1.09844	Methy	1.15178	Methy	1.08248	Margin	0.996652	Methy	0.723317	Methy	0.695388	Margin	0.721225	Margin	0.785334
cg12534759	11	54891913	OR4A15	NM_001005275	TSS200	NA	SLE	Methy	0.947691	Margin	0.85383	Methy	1.01572	Margin	0.611268	Margin	0.455383	Margin	0.764063	Methy	1.07174	Methy	0.944173	Methy	1.10452	Methy	0.944964
cg06838038	11	72075066	ARAP1;ARAP1;ARAP1	NM_001135190;NM_015242;NM_001040118	Body;Body;Body	NA	T2D	Margin	-0.369254	Margin	-0.528679	Unmethy	-1.78779	Unmethy	-2.11372	Margin	-0.757285	Margin	1.10786	Margin	0.204039	Margin	-0.278986	Margin	-0.392646	Margin	-0.925735
cg15279866	11	72109529	ARAP1;ARAP1;ARAP1	NM_001135190;NM_001040118;NM_015242	5'UTR;Body;5'UTR	NA	T2D	Margin	0.770473	Methy	1.14172	Margin	0.969608	Methy	1.20742	Methy	1.16598	Methy	2.0466	Methy	0.880065	Methy	0.738258	Margin	0.818405	Methy	1.32809
cg01381367	11	72111199	ARAP1;ARAP1;ARAP1	NM_001040118;NM_001135190;NM_015242	Body;TSS200;TSS200	NA	T2D	Margin	-1.55602	Margin	-1.53568	Margin	-1.48211	Margin	-1.71224	Margin	-1.5923	Margin	-1.44986	Margin	-1.76783	Margin	-1.70741	Unmethy	-1.7091	Unmethy	-1.69567
cg00350448	11	72111514	ARAP1;ARAP1;ARAP1	NM_001040118;NM_001135190;NM_015242	Body;TSS1500;TSS1500	N_Shelf	T2D	Margin	-1.21142	Margin	-1.34436	Margin	-1.48151	Unmethy	-2.12429	Margin	-1.51844	Margin	-1.23115	Margin	-1.35173	Margin	-1.38007	Margin	-1.36232	Margin	-1.31672
cg12298445	11	72116251	ARAP1	NM_001040118	5'UTR	S_Shore	T2D	Margin	0.477652	Margin	0.921813	Methy	1.41285	Methy	1.48958	Methy	1.17408	Margin	0.737225	Margin	0.16723	Margin	0.126987	Margin	0.348928	Margin	0.300646
cg00242341	11	72125067	ARAP1	NM_001040118	5'UTR	NA	T2D	Margin	-0.0918656	Methy	1.38761	Methy	2.80765	Methy	2.65393	Methy	1.90766	Methy	1.94166	Margin	-1.29117	Margin	-1.82105	Unmethy	-1.6921	Margin	-1.35338
cg09010791	11	72126187	ARAP1	NM_001040118	5'UTR	NA	T2D	Methy	1.11572	Methy	1.96602	Methy	3.29875	Methy	3.68373	Methy	3.13297	Methy	3.02462	Margin	-0.530645	Margin	0.429492	Margin	0.399887	Methy	1.00787
cg16044480	11	72129069	ARAP1	NM_001040118	5'UTR	NA	T2D	Margin	0.867418	Margin	0.223385	Margin	0.634916	Margin	0.539506	Margin	-0.922575	Margin	-1.36452	Margin	-1.05607	Methy	1.78072	Methy	1.33232	Margin	0.287227
cg01380194	11	72130130	ARAP1	NM_001040118	5'UTR	NA	T2D	Margin	0.759995	Methy	1.40738	Methy	2.40387	Methy	2.01714	Margin	-0.159608	Methy	1.17057	Methy	0.687936	Margin	0.39509	Margin	0.148789	Margin	-0.629496
cg20831413	11	72138199	ARAP1	NM_001040118	5'UTR	N_Shelf	T2D	Margin	-1.43005	Margin	0.063253	Margin	0.6732	Margin	0.626386	Margin	-1.4117	Margin	0.450169	Unmethy	-3.34458	Unmethy	-3.22308	Unmethy	-3.04979	Unmethy	-3.23448
cg07590922	11	75830317	NA	NA	NA	N_Shelf	AtopicDermatitis	Methy	1.05229	Methy	1.19959	Methy	1.10156	Methy	0.926205	Methy	1.14436	Margin	1.10376	Methy	0.787468	Methy	0.952251	Methy	1.22517	Methy	1.11608
cg17373759	11	75942969	NA	NA	NA	NA	AtopicDermatitis	Methy	1.42204	Methy	1.97102	Methy	1.56681	Methy	2.68769	Methy	2.3637	Methy	1.29789	Margin	0.559612	Methy	0.980714	Methy	0.926327	Margin	0.717566
cg10400081	11	75977330	NA	NA	NA	NA	AtopicDermatitis	Unmethy	-2.52244	Unmethy	-1.87133	Unmethy	-1.75677	Margin	-0.866023	Margin	-1.22391	Unmethy	-2.85966	Unmethy	-3.55759	Unmethy	-3.42703	Unmethy	-3.57971	Unmethy	-3.66177
cg17647271	11	75977467	NA	NA	NA	NA	AtopicDermatitis	Margin	-0.843455	Margin	-0.148702	Margin	0.177102	Margin	0.696519	Margin	0.361536	Margin	-0.0924043	Margin	-1.72772	Margin	-1.48535	Unmethy	-1.79423	Margin	-1.22412
cg03807330	11	76004880	NA	NA	NA	NA	AtopicDermatitis	Methy	0.948775	Methy	1.45494	Methy	1.72383	Methy	1.40092	Methy	1.24081	Methy	1.9461	Methy	1.09721	Methy	0.871193	Margin	0.881091	Methy	0.888679
cg20430631	11	76018413	NA	NA	NA	NA	AtopicDermatitis	Margin	-0.595755	Margin	0.481315	Methy	1.43209	Methy	2.01852	Methy	1.72699	Margin	-1.65703	Unmethy	-3.34274	Unmethy	-2.3544	Unmethy	-2.63235	Unmethy	-2.37959
cg19074748	11	76026412	NA	NA	NA	NA	AtopicDermatitis	Unmethy	-2.4724	Unmethy	-2.24304	Unmethy	-1.79307	Margin	-2.05993	Unmethy	-2.1864	Unmethy	-3.15419	Unmethy	-3.14569	Unmethy	-2.95863	Unmethy	-2.92007	Unmethy	-2.9559
cg04023526	11	76049580	LRRC32;LRRC32	NM_001128922;NM_005512	Body;Body	NA	AtopicDermatitis	Methy	1.89994	Methy	1.78605	Methy	1.48061	Methy	1.03269	Margin	0.958936	Methy	2.14291	Methy	2.32868	Methy	2.20798	Methy	2.34103	Methy	2.47474
cg27274382	11	76053712	LRRC32;LRRC32	NM_001128922;NM_005512	Body;Body	NA	AtopicDermatitis	Unmethy	-2.52436	Unmethy	-2.0767	Unmethy	-1.80878	Margin	-1.80818	Margin	-1.81143	Unmethy	-2.31343	Unmethy	-2.91213	Unmethy	-2.98706	Unmethy	-2.92041	Unmethy	-2.74008
cg13505393	11	76055220	LRRC32;LRRC32	NM_001128922;NM_005512	5'UTR;5'UTR	N_Shelf	AtopicDermatitis	Margin	-0.705154	Margin	-0.0368921	Margin	0.410521	Margin	0.867218	Margin	0.410455	Margin	-1.44956	Unmethy	-2.69341	Unmethy	-2.07994	Unmethy	-2.24776	Unmethy	-1.59918
cg07202214	11	76058729	LRRC32;LRRC32	NM_001128922;NM_005512	5'UTR;TSS200	N_Shore	AtopicDermatitis	Margin	-1.00937	Margin	-0.859805	Margin	-0.579502	Margin	-0.333982	Margin	-0.647804	Unmethy	-1.95019	Margin	-1.39964	Margin	-1.41776	Margin	-1.49223	Margin	-1.3555
cg20533899	11	76058753	LRRC32;LRRC32	NM_001128922;NM_005512	5'UTR;TSS200	N_Shore	AtopicDermatitis	Margin	-1.54213	Margin	-1.42901	Margin	-1.32064	Margin	-1.07848	Margin	-1.10082	Unmethy	-2.31396	Unmethy	-2.00175	Unmethy	-1.95938	Unmethy	-1.91866	Unmethy	-1.9278
cg05076755	11	76058796	LRRC32;LRRC32	NM_001128922;NM_005512	5'UTR;TSS200	N_Shore	AtopicDermatitis	Methy	3.10709	Methy	3.18545	Methy	3.40024	Methy	3.74508	Methy	3.70686	Margin	1.00697	Methy	2.92039	Methy	2.69088	Methy	2.71871	Methy	2.64414
cg01048195	11	76058884	LRRC32;LRRC32	NM_001128922;NM_005512	5'UTR;TSS200	N_Shore	AtopicDermatitis	Margin	0.91527	Methy	1.05006	Margin	0.911657	Methy	0.940076	Methy	1.20081	Margin	0.0491689	Methy	1.14149	Methy	1.08748	Methy	1.12272	Methy	1.09788
cg07322003	11	76062268	NA	NA	NA	S_Shelf	AtopicDermatitis	Methy	2.42716	Methy	2.36073	Methy	2.76151	Methy	2.53727	Methy	2.26266	Margin	-0.021837	Methy	2.50055	Methy	2.3908	Methy	2.5064	Methy	2.30965
cg07105285	11	92342311	MTNR1B	NM_005959	TSS200	N_Shore	T2D	Margin	-1.12196	Margin	-1.01458	Margin	-1.02115	Margin	-0.58421	Margin	-0.712699	Margin	-0.560996	Margin	-1.6866	Margin	-1.524	Unmethy	-1.5508	Unmethy	-1.65583
cg07609862	11	92342560	MTNR1B	NM_005959	1stExon	Island	T2D	Margin	-1.15128	Margin	-1.01032	Margin	-1.05576	Margin	-0.607582	Margin	-0.769246	Margin	-0.59843	Margin	-1.81768	Margin	-1.6332	Unmethy	-1.74659	Unmethy	-1.88287
cg15559898	11	92342833	MTNR1B	NM_005959	Body	Island	T2D	Margin	-1.62009	Margin	-1.44051	Margin	-1.34842	Margin	-1.37154	Margin	-1.25509	Margin	-1.24131	Unmethy	-2.11389	Margin	-1.86107	Unmethy	-1.89176	Unmethy	-2.00451
cg10712687	11	92354449	MTNR1B	NM_005959	Body	NA	T2D	Methy	6.38291	Unmethy	6.15302	Unmethy	6.24932	Unmethy	6.41498	Unmethy	6.13326	Methy	6.3742	Methy	6.18447	Methy	6.72893	Unmethy	6.35218	Methy	6.15234
cg23049823	11	92355287	MTNR1B	NM_005959	3'UTR	NA	T2D	Methy	1.57704	Methy	1.43857	Methy	1.36009	Margin	0.869483	Margin	0.8635	Margin	1.10002	Methy	2.13953	Methy	1.82508	Methy	1.89527	Methy	1.95193
cg17004104	11	113670940	NNMT	NM_006169	TSS1500	NA	Asthma	Margin	-1.4588	Margin	-1.13173	Margin	-1.20331	Margin	-1.59855	Margin	-1.42272	Margin	-1.37075	Margin	-1.44618	Margin	-1.67602	Unmethy	-1.60672	Margin	-1.43703
cg22962883	11	113683939	NNMT	NM_006169	Body	NA	Asthma	Margin	-1.09957	Margin	-0.422855	Margin	0.16171	Margin	0.630767	Margin	0.344808	Margin	0.578411	Margin	-1.75116	Unmethy	-2.19953	Unmethy	-2.02684	Margin	-1.32956
cg16396907	11	113734985	NA	NA	NA	NA	Asthma	Margin	-1.29799	Margin	-0.575541	Margin	0.239444	Margin	-0.0312242	Margin	-0.263006	Margin	-0.519284	Unmethy	-1.93002	Margin	-1.88343	Unmethy	-2.10168	Unmethy	-2.19608
cg25367999	11	113753827	NA	NA	NA	NA	Asthma	Methy	2.32523	Methy	1.73772	Methy	1.26655	Methy	0.998222	Methy	1.28046	Margin	0.715352	Methy	2.97592	Methy	3.09798	Methy	3.20974	Methy	3.51227
cg07101781	11	127842438	ETS1;ETS1;ETS1	NM_001143820;NM_001162422;NM_005238	Body;Body;Body	NA	SLE	Methy	1.57221	Margin	0.859626	Margin	-0.290261	Margin	0.0964045	Methy	1.34691	Methy	3.05231	Methy	2.69154	Methy	2.6265	Methy	2.84729	Methy	2.91178
cg25068347	11	127848994	ETS1;ETS1;ETS1	NM_001143820;NM_001162422;NM_005238	Body;Body;Body	NA	SLE	Methy	1.34418	Margin	0.566403	Margin	-0.935593	Margin	-0.246124	Methy	1.25775	Margin	-0.841529	Methy	3.01271	Methy	2.72789	Methy	2.97968	Methy	2.75117
cg24662823	11	127855845	ETS1;ETS1;ETS1	NM_001143820;NM_001162422;NM_005238	Body;Body;Body	NA	SLE	Methy	2.25289	Methy	1.23292	Margin	-1.15411	Margin	0.515667	Methy	2.08654	Methy	4.10611	Methy	3.62034	Methy	3.38161	Methy	3.37081	Methy	3.11016
cg02790372	11	127864709	ETS1;ETS1;ETS1	NM_001143820;NM_001162422;NM_005238	Body;Body;Body	NA	SLE	Methy	2.50958	Methy	1.95541	Margin	0.701075	Methy	2.08687	Methy	2.59725	Methy	3.2339	Methy	3.61427	Methy	3.08634	Methy	2.75862	Methy	1.06428
cg21695395	11	127869353	ETS1;ETS1;ETS1	NM_001143820;NM_001162422;NM_005238	Body;Body;Body	NA	SLE	Margin	0.697528	Methy	1.14641	Margin	-0.682041	Margin	0.206831	Methy	1.06661	Methy	3.14179	Methy	3.02672	Margin	0.41644	Margin	0.430433	Margin	0.679375
cg26404422	11	127872220	ETS1;ETS1;ETS1	NM_001143820;NM_001162422;NM_005238	Body;Body;Body	NA	SLE	Margin	0.918786	Margin	-0.00963872	Margin	-1.57463	Unmethy	-2.27999	Margin	-1.28946	Unmethy	-1.97356	Methy	1.96202	Methy	2.30528	Methy	2.4514	Methy	2.57156
cg23514374	11	127877538	ETS1;ETS1;ETS1	NM_001143820;NM_001162422;NM_005238	Body;Body;Body	NA	SLE	Methy	2.12307	Methy	1.02332	Margin	-1.00604	Margin	-0.457379	Margin	0.375384	Methy	3.56015	Methy	3.58496	Methy	3.1932	Methy	3.65426	Methy	3.66808
cg23531640	11	127882462	ETS1;ETS1;ETS1	NM_001143820;NM_001162422;NM_005238	Body;Body;Body	NA	SLE	Unmethy	-2.80269	Unmethy	-2.7459	Unmethy	-3.70883	Unmethy	-2.34022	Unmethy	-2.0913	Margin	-1.22586	Unmethy	-3.56497	Unmethy	-3.13151	Unmethy	-3.04199	Unmethy	-3.20016
cg11760500	11	127891090	ETS1;ETS1;ETS1	NM_001143820;NM_001162422;NM_005238	Body;Body;Body	NA	SLE	Methy	1.88799	Margin	0.621376	Unmethy	-2.08564	Unmethy	-3.1035	Margin	-1.27895	Methy	2.29263	Methy	3.73119	Methy	3.29027	Methy	3.24363	Methy	3.11783
cg04165073	11	127893685	ETS1;ETS1;ETS1	NM_001143820;NM_001162422;NM_005238	Body;Body;Body	N_Shelf	SLE	Margin	0.630429	Margin	-0.243561	Unmethy	-1.95505	Unmethy	-2.88249	Margin	-1.80205	Margin	0.0917936	Methy	1.74839	Methy	1.84205	Methy	2.05446	Methy	2.15958
cg26559804	11	127896481	ETS1;ETS1;ETS1	NM_001143820;NM_001162422;NM_005238	Body;Body;Body	N_Shore	SLE	Unmethy	-1.93146	Unmethy	-2.50457	Unmethy	-3.21111	Unmethy	-3.44872	Unmethy	-3.38755	Unmethy	-3.37164	Margin	-1.82455	Margin	-1.67287	Unmethy	-1.70608	Unmethy	-2.11989
cg11588197	11	127896704	ETS1;ETS1;ETS1	NM_001143820;NM_001162422;NM_005238	Body;Body;Body	N_Shore	SLE	Margin	-1.12227	Unmethy	-1.84472	Unmethy	-2.72729	Unmethy	-3.13678	Unmethy	-2.66088	Unmethy	-2.25327	Margin	-0.902955	Margin	-0.806846	Margin	-0.782346	Margin	-0.891256
cg03295554	11	127900660	ETS1	NM_001143820	Body	S_Shelf	SLE	Margin	0.473166	Margin	-0.168149	Unmethy	-2.28326	Unmethy	-2.60116	Margin	-1.74778	Methy	1.42238	Methy	1.07082	Methy	1.61788	Methy	1.22455	Methy	1.59161
cg03963011	11	127923761	ETS1	NM_001143820	Body	N_Shore	SLE	Unmethy	-2.53848	Unmethy	-2.10702	Unmethy	-2.56739	Margin	-0.857216	Margin	-1.15481	Unmethy	-3.58786	Unmethy	-4.28417	Unmethy	-3.66297	Unmethy	-4.00561	Unmethy	-4.43783
cg09915500	11	127924159	ETS1	NM_001143820	Body	N_Shore	SLE	Unmethy	-2.29177	Unmethy	-2.08492	Unmethy	-2.23755	Margin	-1.07505	Margin	-1.15178	Unmethy	-2.84919	Unmethy	-3.09283	Unmethy	-2.83211	Unmethy	-3.19816	Unmethy	-3.16473
cg23774988	11	127924409	ETS1	NM_001143820	Body	Island	SLE	Unmethy	-2.36432	Margin	-1.67559	Margin	-1.50943	Margin	0.132901	Margin	-0.482543	Unmethy	-1.81618	Unmethy	-2.95127	Unmethy	-2.81936	Unmethy	-2.8027	Unmethy	-3.02408
cg01900413	11	127924566	ETS1	NM_001143820	Body	Island	SLE	Margin	-1.29649	Margin	-0.684126	Margin	-0.330741	Margin	0.218443	Margin	-0.0235199	Margin	-1.40128	Unmethy	-2.36082	Unmethy	-2.23057	Unmethy	-2.44343	Unmethy	-2.58372
cg14718848	11	127926073	ETS1	NM_001143820	Body	S_Shore	SLE	Margin	0.563152	Methy	1.49604	Methy	1.13989	Methy	1.22519	Methy	3.06176	Methy	1.91526	Methy	1.79839	Margin	-0.0645895	Margin	-0.240283	Unmethy	-1.63176
cg08458745	11	127927998	ETS1	NM_001143820	Body	S_Shelf	SLE	Margin	-0.102648	Margin	-0.078223	Margin	0.322346	Margin	0.541783	Margin	0.434648	Unmethy	-3.055	Margin	-1.19227	Margin	-0.211983	Margin	-0.408624	Unmethy	-1.52226
cg11552868	11	127929386	ETS1	NM_001143820	Body	NA	SLE	Methy	1.5103	Methy	1.6049	Methy	2.11136	Methy	2.17905	Methy	2.46029	Margin	0.753812	Methy	1.06938	Methy	0.788255	Margin	0.870313	Methy	1.09204
cg25578781	11	127951280	ETS1	NM_001143820	5'UTR	NA	SLE	Margin	-0.840049	Margin	0.629921	Methy	2.06754	Methy	2.28048	Methy	1.48666	Margin	-0.931522	Unmethy	-3.07544	Unmethy	-2.54429	Unmethy	-2.94185	Unmethy	-3.00716
cg18898103	11	127957337	ETS1	NM_001143820	5'UTR	NA	SLE	Methy	1.74483	Methy	3.18823	Methy	3.12565	Methy	3.21887	Methy	3.45323	Methy	3.4742	Methy	3.2307	Methy	0.869018	Margin	0.487904	Margin	-1.46203
cg13918228	12	9806232	CD69;CD69;CD69	NR_026671;NR_026672;NM_001781	TSS1500;TSS1500;TSS1500	NA	T1D	Methy	3.21539	Methy	3.04776	Methy	3.09643	Methy	3.58501	Methy	3.65378	Margin	0.324386	Methy	3.30985	Methy	3.3546	Methy	3.47592	Methy	3.28343
cg01810863	12	54646183	SILV;CDK2;CDK2	NM_006928;NM_001798;NM_052827	TSS200;TSS1500;TSS1500	N_Shore	Asthma,T1D	Margin	-0.0710037	Margin	0.955377	Methy	1.54546	Methy	2.40833	Methy	1.74979	Margin	0.587925	Margin	-0.912123	Margin	-1.22138	Margin	-1.09371	Margin	-0.820836
cg09106999	12	54646332	CDK2;SILV;CDK2	NM_001798;NM_006928;NM_052827	TSS1500;TSS1500;TSS1500	N_Shore	Asthma,T1D	Margin	-1.18378	Margin	-0.289258	Margin	-0.000867933	Margin	0.715007	Margin	0.0622988	Margin	-0.812338	Unmethy	-2.14449	Unmethy	-2.29137	Unmethy	-2.66037	Unmethy	-3.0735
cg16325610	12	54646438	CDK2;SILV;CDK2	NM_001798;NM_006928;NM_052827	TSS1500;TSS1500;TSS1500	N_Shore	Asthma,T1D	Unmethy	-2.53794	Unmethy	-2.24001	Margin	-1.43276	Unmethy	-2.21121	Unmethy	-2.56913	Unmethy	-3.16975	Unmethy	-3.40297	Unmethy	-3.20326	Unmethy	-3.31605	Unmethy	-3.30949
cg10581632	12	54646982	CDK2;CDK2;CDK2;SILV;CDK2	NM_052827;NM_001798;NM_001798;NM_006928;NM_052827	5'UTR;1stExon;5'UTR;TSS1500;1stExon	Island	Asthma,T1D	Margin	-1.80618	Unmethy	-2.24671	Unmethy	-1.97234	Margin	-1.85743	Unmethy	-1.98833	Unmethy	-1.94995	Margin	-1.71851	Unmethy	-1.94201	Unmethy	-2.08183	Unmethy	-2.13657
cg02826233	12	54652161	CDK2;CDK2	NM_001798;NM_052827	3'UTR;3'UTR	N_Shore	Asthma,T1D	Methy	1.98224	Methy	1.86156	Methy	1.66471	Methy	1.63878	Methy	2.0014	Methy	2.13722	Methy	2.03137	Methy	1.82191	Methy	1.36518	Margin	0.193072
cg15460809	12	54677065	SUOX;SUOX;SUOX	NM_000456;NM_001032386;NM_001032387	TSS1500;TSS1500;TSS1500	NA	Asthma,T1D	Unmethy	-2.83367	Unmethy	-2.31589	Unmethy	-1.88582	Margin	-1.56362	Unmethy	-2.45111	Unmethy	-3.56464	Unmethy	-3.94118	Unmethy	-3.80694	Unmethy	-3.83067	Unmethy	-3.94267
cg05368555	12	54677072	SUOX;SUOX;SUOX	NM_000456;NM_001032386;NM_001032387	TSS1500;TSS1500;TSS1500	NA	Asthma,T1D	Unmethy	-2.26768	Unmethy	-1.76798	Margin	-1.26197	Margin	-0.855681	Margin	-1.73124	Unmethy	-3.01563	Unmethy	-3.55536	Unmethy	-3.04111	Unmethy	-3.29433	Unmethy	-3.39415
cg01105256	12	54677134	SUOX;SUOX;SUOX	NM_000456;NM_001032386;NM_001032387	TSS200;TSS200;TSS200	NA	Asthma,T1D	Unmethy	-1.97796	Margin	-1.66354	Margin	-1.31843	Margin	-0.928647	Margin	-1.41128	Unmethy	-2.52179	Unmethy	-3.06131	Unmethy	-2.85812	Unmethy	-3.18506	Unmethy	-3.27956
cg07060074	12	54677145	SUOX;SUOX;SUOX	NM_000456;NM_001032386;NM_001032387	TSS200;TSS200;TSS200	NA	Asthma,T1D	Unmethy	-2.28035	Margin	-1.66567	Margin	-1.25313	Margin	-0.942478	Margin	-1.54613	Unmethy	-3.18836	Unmethy	-3.97953	Unmethy	-3.56442	Unmethy	-3.67803	Unmethy	-3.94152
cg16853842	12	54677206	SUOX;SUOX;SUOX	NM_000456;NM_001032386;NM_001032387	TSS200;TSS200;TSS200	NA	Asthma,T1D	Unmethy	-3.01997	Unmethy	-2.85108	Unmethy	-2.41483	Margin	-2.01461	Unmethy	-2.97782	Unmethy	-3.4522	Unmethy	-3.36818	Unmethy	-3.48274	Unmethy	-3.70642	Unmethy	-3.65779
cg09689944	12	54677219	SUOX;SUOX;SUOX	NM_000456;NM_001032386;NM_001032387	TSS200;TSS200;TSS200	NA	Asthma,T1D	Unmethy	-2.21469	Unmethy	-1.83681	Margin	-1.44557	Margin	-1.25079	Unmethy	-2.03004	Unmethy	-2.95613	Unmethy	-3.20855	Unmethy	-2.97712	Unmethy	-2.94444	Unmethy	-3.19393
cg22580629	12	54677246	SUOX;SUOX;SUOX	NM_000456;NM_001032386;NM_001032387	TSS200;TSS200;TSS200	NA	Asthma,T1D	Unmethy	-2.31883	Unmethy	-2.04908	Margin	-1.42156	Margin	-1.1293	Unmethy	-1.9208	Unmethy	-3.18152	Unmethy	-3.42701	Unmethy	-3.10674	Unmethy	-3.35944	Unmethy	-3.6046
cg06495347	12	54677718	SUOX;SUOX;SUOX	NM_001032386;NM_001032387;NM_000456	5'UTR;5'UTR;5'UTR	NA	Asthma,T1D	Unmethy	-2.01527	Margin	-1.53305	Margin	-1.14197	Margin	-1.01302	Margin	-1.413	Unmethy	-2.24324	Unmethy	-2.87187	Unmethy	-2.71849	Unmethy	-2.89017	Unmethy	-3.22662
cg03532253	12	54685502	SUOX;SUOX;SUOX	NM_001032386;NM_000456;NM_001032387	3'UTR;3'UTR;3'UTR	N_Shore	Asthma,T1D	Methy	1.32772	Methy	2.21084	Methy	3.13634	Methy	3.39588	Methy	2.80605	Methy	2.25389	Methy	0.888437	Margin	0.4442	Margin	0.313862	Margin	-0.000583953
cg23425280	12	54688073	NA	NA	NA	S_Shore	Asthma,T1D	Unmethy	-2.03619	Unmethy	-1.9618	Unmethy	-2.05842	Margin	-2.01579	Margin	-1.89032	Unmethy	-1.93727	Unmethy	-1.90786	Unmethy	-1.97324	Unmethy	-1.93647	Unmethy	-2.05497
cg24414325	12	54700709	IKZF4	NM_022465	TSS1500	NA	Asthma,T1D	Margin	-0.140538	Methy	1.17	Methy	1.71591	Methy	3.48864	Methy	2.83424	Methy	2.0154	Margin	-1.29368	Unmethy	-1.99487	Unmethy	-1.79994	Margin	-1.01886
cg00026033	12	54700757	IKZF4	NM_022465	TSS200	NA	Asthma,T1D	Margin	-0.355253	Margin	0.2918	Margin	0.772242	Methy	2.42055	Methy	1.28799	Margin	0.287002	Unmethy	-2.49718	Unmethy	-2.24764	Unmethy	-2.57295	Unmethy	-2.76455
cg20054248	12	54700775	IKZF4	NM_022465	TSS200	NA	Asthma,T1D	Margin	-0.930514	Margin	-0.31469	Margin	-0.0545248	Margin	0.582818	Margin	0.123985	Margin	-0.88958	Unmethy	-2.99267	Unmethy	-2.5716	Unmethy	-2.99765	Unmethy	-3.1581
cg01565774	12	54700800	IKZF4	NM_022465	TSS200	NA	Asthma,T1D	Margin	-1.03478	Margin	-0.385134	Margin	-0.156855	Margin	0.570225	Margin	0.16214	Margin	-0.951388	Unmethy	-2.8016	Unmethy	-2.62463	Unmethy	-2.81359	Unmethy	-2.89353
cg17331199	12	54701149	IKZF4;IKZF4	NM_022465;NM_022465	1stExon;5'UTR	NA	Asthma,T1D	Unmethy	-2.4066	Unmethy	-2.09866	Unmethy	-1.89992	Margin	-1.40257	Margin	-1.34476	Unmethy	-2.81006	Unmethy	-3.52509	Unmethy	-3.35563	Unmethy	-3.31543	Unmethy	-3.44456
cg23363971	12	54701538	IKZF4;IKZF4	NM_022465;NM_022465	1stExon;5'UTR	NA	Asthma,T1D	Unmethy	-4.24046	Unmethy	-3.78677	Unmethy	-4.88077	Margin	-2.05031	Unmethy	-2.91483	Unmethy	-3.23248	Unmethy	-5.9028	Unmethy	-5.29099	Unmethy	-5.8688	Unmethy	-6.01585
cg20672549	12	54718411	IKZF4	NM_022465	3'UTR	N_Shelf	Asthma,T1D	Methy	2.63266	Methy	1.75996	Methy	1.55469	Margin	0.421126	Margin	0.66012	Methy	2.19918	Methy	3.41823	Methy	3.39319	Methy	3.2815	Methy	3.27346
cg25095951	12	54721514	RPS26	NM_001029	TSS1500	N_Shore	T1D	Margin	-1.53706	Margin	-1.15464	Margin	-1.01049	Margin	-0.849421	Margin	-1.15676	Margin	-1.27876	Margin	-1.78972	Unmethy	-1.92068	Unmethy	-2.07419	Unmethy	-2.72822
cg19258882	12	54759072	ERBB3;ERBB3	NM_001982;NM_001005915	TSS1500;TSS1500	Island	T1D	Margin	0.460055	Margin	0.956921	Methy	1.30504	Methy	1.70107	Methy	1.01783	Margin	0.762148	Margin	0.139262	Margin	0.203082	Margin	0.241184	Margin	0.289595
cg26929894	12	54759141	ERBB3;ERBB3	NM_001982;NM_001005915	TSS1500;TSS1500	Island	T1D	Unmethy	-2.11624	Margin	-1.69629	Margin	-1.10589	Margin	-1.10981	Margin	-1.68643	Unmethy	-2.59941	Unmethy	-3.13625	Unmethy	-2.9891	Unmethy	-2.83257	Unmethy	-2.97642
cg04794420	12	54760659	ERBB3;ERBB3	NM_001005915;NM_001982	Body;Body	Island	T1D	Unmethy	-2.21706	Unmethy	-2.10703	Unmethy	-2.00032	Margin	-1.90843	Unmethy	-1.95315	Unmethy	-1.84718	Unmethy	-2.70876	Unmethy	-2.54913	Unmethy	-2.66199	Unmethy	-2.76604
cg10869879	12	54760836	ERBB3;ERBB3	NM_001005915;NM_001982	Body;Body	S_Shore	T1D	Margin	-1.61826	Margin	-1.62282	Margin	-1.45736	Margin	-0.918828	Margin	-1.61898	Margin	-1.57807	Unmethy	-2.03296	Unmethy	-2.06078	Unmethy	-2.14231	Unmethy	-2.23502
cg00907267	12	54761038	ERBB3;ERBB3	NM_001005915;NM_001982	Body;Body	S_Shore	T1D	Methy	1.11981	Methy	1.53801	Methy	1.49101	Methy	1.49786	Methy	1.72195	Margin	0.951171	Methy	1.42327	Methy	0.753419	Margin	0.894645	Methy	0.871847
cg05207107	12	54781381	ERBB3	NM_001982	Body	N_Shelf	T1D	Methy	1.04141	Methy	1.68192	Methy	1.97302	Methy	1.45073	Methy	1.84297	Methy	1.79756	Methy	1.45713	Margin	0.414359	Margin	0.62144	Methy	0.981864
cg10056728	12	54783340	PA2G4;ERBB3	NM_006191;NM_001982	TSS1500;3'UTR	N_Shore	T1D	Methy	1.09978	Margin	0.179771	Margin	-1.27552	Unmethy	-3.11988	Margin	-1.61129	Methy	1.98476	Methy	1.95507	Methy	1.72944	Methy	1.67593	Methy	1.77662
cg04270799	12	56230326	KIF5A	NM_004984	1stExon	S_Shore	RA	Unmethy	-1.99859	Margin	-1.69127	Margin	-1.39418	Margin	-1.45412	Margin	-1.50194	Unmethy	-1.96759	Unmethy	-2.46863	Unmethy	-2.40462	Unmethy	-2.48161	Unmethy	-2.67208
cg20416037	12	56270979	PIP4K2C;PIP4K2C;PIP4K2C;PIP4K2C	NM_001146258;NM_001146259;NM_001146260;NM_024779	TSS1500;TSS1500;TSS1500;TSS1500	N_Shore	RA	Unmethy	-2.21839	Unmethy	-2.08086	Unmethy	-1.88421	Margin	-1.7202	Unmethy	-2.07008	Unmethy	-2.37846	Unmethy	-2.63594	Unmethy	-2.63101	Unmethy	-2.46377	Unmethy	-2.7954
cg25133016	12	56270986	PIP4K2C;PIP4K2C;PIP4K2C;PIP4K2C	NM_001146258;NM_001146259;NM_001146260;NM_024779	TSS1500;TSS1500;TSS1500;TSS1500	N_Shore	RA	Unmethy	-1.90883	Unmethy	-1.8948	Unmethy	-1.68467	Margin	-1.8245	Margin	-1.85853	Unmethy	-2.05954	Unmethy	-2.11568	Unmethy	-2.26643	Unmethy	-2.23391	Unmethy	-2.35107
cg20183802	12	56271826	PIP4K2C;PIP4K2C;PIP4K2C;PIP4K2C	NM_024779;NM_001146258;NM_001146260;NM_001146259	Body;Body;Body;Body	S_Shore	RA	Margin	-1.88149	Margin	-1.56786	Margin	-1.16522	Margin	-1.04657	Margin	-1.83468	Margin	-1.5497	Unmethy	-2.43665	Unmethy	-2.65039	Unmethy	-2.88176	Unmethy	-3.49348
cg07269374	12	64462974	RPSAP52	NR_026825	Body	NA	T2D	Methy	1.97462	Methy	1.31557	Methy	1.0863	Margin	0.295778	Margin	0.48958	Margin	0.751082	Methy	2.48229	Methy	2.49303	Methy	2.5418	Methy	2.27943
cg05233774	12	64479237	RPSAP52	NR_026825	Body	NA	T2D	Methy	1.14622	Methy	1.16323	Methy	1.21626	Methy	0.949613	Methy	1.0096	Margin	0.857814	Methy	1.35941	Methy	1.24762	Methy	1.31866	Methy	1.25866
cg17130567	12	64504324	HMGA2;RPSAP52;HMGA2	NM_003484;NR_026825;NM_003483	TSS200;Body;TSS200	Island	T2D	Unmethy	-2.41737	Unmethy	-2.46258	Unmethy	-2.65818	Unmethy	-2.06723	Unmethy	-2.30385	Margin	-1.45997	Unmethy	-2.34961	Unmethy	-2.7668	Unmethy	-2.48117	Unmethy	-2.57551
cg00865774	12	64505444	RPSAP52;HMGA2;HMGA2	NR_026825;NM_003484;NM_003483	Body;Body;Body	Island	T2D	Margin	-1.80364	Margin	-1.4863	Unmethy	-1.73954	Margin	-1.87889	Margin	-1.39112	Margin	-1.62055	Margin	-1.64433	Margin	-1.85808	Unmethy	-1.70717	Unmethy	-1.78021
cg20688651	12	64507021	HMGA2;RPSAP52;HMGA2	NM_003484;NR_026825;NM_003483	Body;TSS200;Body	S_Shore	T2D	Margin	-0.601118	Margin	-0.423199	Margin	0.427314	Margin	0.289614	Margin	0.508027	Margin	-1.13644	Unmethy	-1.93853	Margin	-1.6414	Margin	-1.36524	Unmethy	-1.55932
cg25161912	12	64507038	HMGA2;RPSAP52;HMGA2	NM_003484;NR_026825;NM_003483	Body;TSS200;Body	S_Shore	T2D	Margin	-0.178317	Margin	0.247529	Methy	1.03169	Margin	0.758858	Margin	0.807366	Margin	-0.521032	Margin	-1.10555	Margin	-0.763015	Margin	-0.877178	Margin	-0.96078
cg13200550	12	64508056	RPSAP52;HMGA2;HMGA2	NR_026825;NM_003484;NM_003483	TSS1500;Body;Body	S_Shore	T2D	Unmethy	-2.06261	Margin	-1.40486	Margin	-0.913314	Margin	-0.805953	Margin	-0.419222	Unmethy	-1.99181	Unmethy	-2.94851	Unmethy	-2.58127	Unmethy	-3.0552	Unmethy	-2.72291
cg02534850	12	64514733	HMGA2;HMGA2	NM_003484;NM_003483	Body;Body	NA	T2D	Methy	2.01966	Methy	2.08183	Methy	1.6075	Margin	0.851796	Methy	1.26218	Methy	1.32623	Methy	2.85452	Methy	2.4268	Methy	2.63367	Methy	2.67597
cg17131837	12	64537928	HMGA2;HMGA2	NM_003484;NM_003483	Body;Body	NA	T2D	Methy	1.99592	Methy	1.53207	Methy	1.54397	Margin	0.632891	Margin	0.776167	Margin	0.964773	Methy	1.91761	Methy	2.03599	Methy	2.27387	Methy	2.14718
cg04890607	12	64548481	HMGA2;HMGA2	NM_003484;NM_003483	Body;Body	NA	T2D	Margin	0.530979	Methy	1.08237	Methy	1.72566	Methy	3.36459	Methy	2.52416	Methy	4.32829	Margin	-1.16013	Margin	-0.420468	Margin	0.185349	Methy	2.3199
cg23146197	12	64557269	HMGA2;HMGA2	NM_003484;NM_003483	Body;Body	NA	T2D	Methy	1.1671	Methy	1.18439	Methy	1.3463	Methy	1.21706	Methy	1.08329	Margin	0.876129	Methy	1.03037	Methy	1.15351	Methy	1.21062	Methy	0.897885
cg21822187	12	64572408	HMGA2;HMGA2	NM_003484;NM_003483	Body;Body	NA	T2D	Margin	0.120998	Margin	0.170227	Methy	1.4216	Margin	0.65727	Margin	0.038032	Margin	0.00591369	Margin	-1.53347	Margin	-0.223845	Margin	-0.279942	Margin	-0.914881
cg16965605	12	64598294	HMGA2	NM_003483	Body	NA	T2D	Unmethy	-2.87958	Unmethy	-2.45658	Unmethy	-1.94694	Margin	-1.46948	Margin	-1.50411	Unmethy	-2.87376	Unmethy	-3.93279	Unmethy	-3.94368	Unmethy	-3.66975	Unmethy	-3.54399
cg16624984	12	64616403	HMGA2	NM_003483	Body	NA	T2D	Methy	1.50272	Methy	1.64819	Methy	2.05375	Methy	2.38196	Margin	0.881793	Methy	3.64303	Methy	1.82682	Methy	1.0391	Margin	0.725029	Unmethy	-1.56395
cg24776736	12	64642624	HMGA2	NM_003483	Body	NA	T2D	Margin	-0.306853	Margin	0.472748	Methy	1.12423	Methy	0.934728	Margin	0.718897	Margin	0.298755	Margin	-0.429109	Margin	-0.634874	Margin	-0.617907	Margin	-1.20302
cg02802391	12	64643350	HMGA2	NM_003483	3'UTR	NA	T2D	Margin	-1.2821	Margin	-0.66404	Margin	-0.484891	Margin	-0.310841	Margin	-0.565564	Margin	-0.819514	Margin	-1.55872	Margin	-1.72427	Unmethy	-1.50492	Margin	-1.44798
cg04950931	12	69838724	TSPAN8	NM_004616	TSS1500	NA	T2D	Methy	1.38272	Methy	1.42548	Methy	1.33082	Methy	1.15398	Methy	1.23373	Margin	1.07593	Methy	1.11347	Methy	1.17726	Methy	1.27366	Methy	1.17613
cg04830629	12	69844603	NA	NA	NA	NA	T2D	Methy	1.05753	Methy	1.02716	Margin	0.654914	Margin	0.183039	Margin	0.18374	Margin	0.404937	Methy	1.37775	Methy	1.39085	Methy	1.5177	Methy	1.62508
cg04538585	12	70122004	LGR5	NM_003667	Body	S_Shore	T2D	Methy	2.59066	Methy	3.52136	Methy	3.42945	Methy	3.70188	Methy	3.75653	Methy	3.85973	Methy	3.2239	Methy	2.16495	Methy	1.38155	Margin	-1.15662
cg06680065	12	70122006	LGR5	NM_003667	Body	S_Shore	T2D	Methy	2.64826	Methy	3.14511	Methy	3.41542	Methy	3.30719	Methy	3.33079	Methy	3.51988	Methy	2.91888	Methy	2.22726	Methy	1.60168	Margin	-0.832984
cg15909056	12	70123442	LGR5	NM_003667	Body	S_Shelf	T2D	Methy	2.3357	Methy	1.71782	Methy	1.36014	Margin	0.842456	Margin	0.676585	Methy	1.60768	Methy	2.60796	Methy	2.764	Methy	2.9549	Methy	3.34167
cg01817029	12	70951777	LOC283392;TRHDE;LOC283392	NR_026837;NM_013381;NR_026836	Body;TSS1500;Body	N_Shore	RA	Unmethy	-2.15829	Unmethy	-2.17215	Unmethy	-2.22945	Margin	-1.95824	Unmethy	-2.06556	Unmethy	-1.92196	Unmethy	-2.63012	Unmethy	-2.63761	Unmethy	-2.40915	Unmethy	-2.44873
cg13663218	12	70953243	LOC283392;TRHDE;LOC283392	NR_026837;NM_013381;NR_026836	Body;1stExon;Body	Island	RA	Margin	-1.78557	Margin	-1.47278	Margin	-1.50072	Margin	-1.31316	Margin	-1.60812	Margin	-1.22945	Unmethy	-2.30958	Unmethy	-2.44062	Unmethy	-2.37162	Unmethy	-2.42554
cg01030121	12	70953503	LOC283392;TRHDE;LOC283392	NR_026837;NM_013381;NR_026836	Body;1stExon;Body	Island	RA	Unmethy	-2.84383	Unmethy	-2.3258	Unmethy	-2.393	Margin	-1.75962	Unmethy	-2.10364	Unmethy	-2.03381	Unmethy	-3.33323	Unmethy	-3.26547	Unmethy	-3.56264	Unmethy	-3.38834
cg09972192	12	70953593	LOC283392;TRHDE;LOC283392	NR_026836;NM_013381;NR_026837	TSS200;1stExon;TSS200	Island	RA	Margin	-1.35183	Margin	-1.49489	Margin	-1.39469	Margin	-1.02124	Margin	-1.27217	Margin	-1.22813	Margin	-1.58908	Margin	-1.68753	Unmethy	-1.77206	Unmethy	-1.7741
cg19188182	12	70953779	LOC283392;TRHDE;LOC283392	NR_026836;NM_013381;NR_026837	TSS1500;Body;TSS1500	Island	RA	Margin	-1.65708	Margin	-1.71916	Margin	-1.50399	Margin	-1.04421	Margin	-1.27738	Margin	-1.11275	Unmethy	-2.05995	Unmethy	-2.11173	Unmethy	-2.22111	Unmethy	-2.33452
cg04640250	12	70953793	LOC283392;TRHDE;LOC283392	NR_026836;NM_013381;NR_026837	TSS1500;Body;TSS1500	Island	RA	Unmethy	-2.82932	Unmethy	-2.35811	Unmethy	-2.1909	Margin	-1.99282	Unmethy	-2.25249	Margin	-1.7537	Unmethy	-3.39951	Unmethy	-3.27783	Unmethy	-3.19384	Unmethy	-3.50625
cg15604046	12	71026965	TRHDE	NM_013381	Body	NA	RA	Margin	0.563305	Margin	0.78719	Margin	0.801371	Margin	0.296852	Margin	0.721357	Margin	0.872883	Margin	0.504456	Margin	0.492802	Methy	1.22232	Methy	1.2978
cg05612673	12	71123226	TRHDE	NM_013381	Body	NA	RA	Methy	1.89824	Methy	1.29839	Margin	0.774641	Margin	0.217884	Margin	0.808977	Margin	0.891442	Methy	2.3532	Methy	2.17315	Methy	2.067	Methy	2.66547
cg09791009	12	71320275	TRHDE	NM_013381	Body	NA	RA	Methy	0.938009	Methy	1.13016	Methy	1.03981	Margin	0.86378	Methy	1.02983	Margin	1.05401	Methy	0.889661	Methy	0.935039	Methy	0.994883	Methy	1.02548
cg14905634	12	71343636	TRHDE	NM_013381	3'UTR	NA	RA	Methy	1.62503	Methy	1.12281	Margin	0.92686	Margin	0.700379	Margin	0.751037	Methy	1.47687	Methy	2.11451	Methy	1.54031	Methy	1.53014	Methy	1.79193
cg14760880	12	110325175	NA	NA	NA	N_Shelf	RA,T1D	Unmethy	-2.02088	Margin	-1.5063	Margin	-1.14393	Margin	-0.730351	Margin	-1.49469	Unmethy	-2.90879	Unmethy	-3.40671	Unmethy	-3.18877	Unmethy	-3.38741	Unmethy	-3.42767
cg20594304	12	110325340	NA	NA	NA	N_Shore	RA,T1D	Unmethy	-2.35643	Margin	-1.70015	Margin	-1.45493	Margin	-0.616791	Unmethy	-1.93391	Unmethy	-3.42628	Unmethy	-3.54498	Unmethy	-3.52049	Unmethy	-3.46323	Unmethy	-3.4468
cg24568579	12	110325407	NA	NA	NA	N_Shore	RA,T1D	Margin	-0.922178	Margin	-0.24544	Margin	0.113699	Margin	0.480647	Margin	-0.568818	Unmethy	-2.40143	Unmethy	-2.81223	Unmethy	-2.60393	Unmethy	-3.14514	Unmethy	-3.27687
cg11714320	12	110329559	SH2B3	NM_005475	5'UTR	S_Shore	RA,T1D	Margin	-1.20824	Margin	-0.602636	Margin	-0.528267	Methy	0.949484	Margin	0.194623	Unmethy	-4.18256	Unmethy	-3.89975	Unmethy	-2.88532	Unmethy	-3.4752	Unmethy	-4.12238
cg26359133	12	110331802	SH2B3	NM_005475	5'UTR	S_Shelf	RA,T1D	Unmethy	-1.99621	Margin	-1.43662	Unmethy	-1.7303	Margin	-0.716732	Margin	-0.885448	Unmethy	-2.71046	Unmethy	-3.09504	Unmethy	-2.81589	Unmethy	-2.83978	Unmethy	-2.84556
cg01356824	12	110334267	SH2B3	NM_005475	5'UTR	NA	RA,T1D	Unmethy	-2.05093	Margin	-1.71709	Margin	-1.31166	Margin	-0.953827	Margin	-1.39328	Unmethy	-2.79579	Unmethy	-2.81935	Unmethy	-2.63924	Unmethy	-2.67993	Unmethy	-2.712
cg10283036	12	110337471	SH2B3	NM_005475	5'UTR	N_Shelf	RA,T1D	Margin	0.851911	Methy	1.69915	Methy	2.44151	Methy	2.556	Methy	1.96772	Methy	2.67448	Methy	1.08559	Margin	0.530838	Margin	0.712336	Methy	0.95877
cg26501657	12	110357938	SH2B3	NM_005475	Body	NA	RA,T1D	Margin	-0.20305	Margin	-0.28137	Margin	-0.161071	Margin	-1.27146	Unmethy	-2.83174	Margin	-0.147267	Margin	-0.104978	Margin	-0.15547	Margin	-0.171471	Margin	-0.335554
cg03690812	12	110359866	SH2B3	NM_005475	Body	NA	RA,T1D	Methy	1.02591	Methy	1.71821	Methy	2.60948	Methy	2.68641	Methy	2.55724	Methy	2.52282	Margin	0.548549	Margin	0.641081	Margin	0.766671	Margin	0.702928
cg16278728	12	110369933	SH2B3	NM_005475	Body	NA	RA,T1D	Methy	6.61785	Unmethy	6.68862	Unmethy	6.46521	Unmethy	6.60201	Unmethy	6.55532	Methy	6.44564	Methy	6.37578	Methy	6.82358	Unmethy	6.63545	Unmethy	6.75
cg20595271	12	110373583	SH2B3	NM_005475	3'UTR	NA	RA,T1D	Methy	0.971778	Margin	0.751007	Margin	0.463206	Margin	0.617905	Margin	-0.363277	Methy	1.36509	Methy	0.847204	Methy	0.963824	Methy	1.03656	Margin	0.48253
cg17301248	12	110951586	NAA25	NM_024953	3'UTR	NA	T1D	Margin	-0.0982822	Methy	1.75356	Methy	2.91851	Methy	3.27337	Methy	2.36204	Methy	1.57786	Unmethy	-2.67023	Unmethy	-2.10825	Unmethy	-2.5332	Unmethy	-3.08825
cg16731153	12	111009987	NAA25	NM_024953	Body	NA	T1D	Methy	3.18748	Methy	3.60819	Methy	3.70477	Methy	3.63411	Methy	3.78452	Methy	3.99349	Methy	3.33123	Methy	2.84506	Methy	2.11337	Margin	0.646379
cg18700744	12	111018942	NAA25	NM_024953	Body	NA	T1D	Margin	0.7352	Margin	0.0242776	Margin	0.0710067	Margin	0.110314	Margin	-0.554919	Margin	-0.10785	Margin	-0.829388	Methy	1.12427	Methy	1.02459	Margin	-0.50723
cg08538139	12	111038956	NA	NA	NA	NA	T1D	Unmethy	-1.97001	Margin	-1.37169	Margin	-1.04918	Margin	-1.03717	Margin	-1.03671	Unmethy	-1.92076	Unmethy	-3.02137	Unmethy	-2.68968	Unmethy	-2.83562	Unmethy	-2.88781
cg01655703	12	111340521	PTPN11	NM_002834	TSS1500	N_Shore	T1D	Margin	-1.69035	Unmethy	-1.74149	Unmethy	-1.74914	Margin	-2.04081	Margin	-1.87234	Unmethy	-2.00032	Margin	-1.55766	Margin	-1.63526	Margin	-1.4375	Unmethy	-1.7806
cg08933160	12	111428984	PTPN11	NM_002834	3'UTR	NA	T1D	Methy	1.07809	Methy	1.08857	Methy	1.09671	Margin	0.863089	Methy	1.05817	Margin	1.02265	Methy	0.913197	Methy	0.984604	Methy	1.10615	Methy	1.16615
cg25477769	12	119900949	HNF1A;HNF1A	NM_000545;NM_000545	1stExon;5'UTR	Island	T2D	Methy	1.32592	Methy	2.13676	Methy	2.45894	Methy	2.07854	Methy	1.60401	Methy	2.1296	Methy	1.57703	Methy	1.21253	Methy	1.14858	Margin	0.812844
cg19395441	12	119938834	C12orf43	NM_022895	TSS200	S_Shore	T2D	Unmethy	-2.0444	Unmethy	-1.82081	Unmethy	-2.12636	Unmethy	-2.70608	Unmethy	-2.35858	Unmethy	-2.23056	Margin	-1.77643	Margin	-1.80733	Unmethy	-1.59227	Unmethy	-1.75591
cg19788934	12	119940089	C12orf43	NM_022895	TSS1500	S_Shore	T2D	Methy	1.88427	Methy	2.71998	Methy	3.06695	Methy	3.0036	Methy	3.0147	Methy	2.98398	Methy	2.45925	Methy	1.31185	Margin	0.849698	Unmethy	-1.82127
cg13523236	12	127843093	NA	NA	NA	N_Shelf	SLE	Methy	3.61439	Methy	2.75983	Methy	4.45846	Methy	2.24291	Margin	0.383622	Methy	4.69231	Methy	4.35904	Methy	3.99743	Methy	3.95382	Methy	4.38819
cg04826413	12	127845889	SLC15A4	NM_145648	Body	N_Shore	SLE	Methy	2.42646	Methy	2.07492	Methy	3.24228	Methy	1.54932	Margin	0.661513	Margin	0.715796	Methy	2.6448	Methy	2.46853	Methy	2.50898	Methy	2.79158
cg04356090	12	127846086	SLC15A4	NM_145648	Body	N_Shore	SLE	Methy	3.61973	Methy	3.0568	Methy	4.85167	Methy	2.58175	Methy	1.61125	Margin	0.393117	Methy	4.69275	Methy	4.94698	Methy	5.01916	Methy	5.17173
cg05934015	12	127846218	SLC15A4	NM_145648	Body	Island	SLE	Methy	3.50092	Methy	2.46412	Methy	5.45337	Methy	3.36599	Methy	1.60871	Margin	-0.0929778	Methy	4.8219	Methy	5.25303	Methy	5.03755	Methy	5.33027
cg16782719	12	127846287	SLC15A4	NM_145648	Body	Island	SLE	Methy	1.85618	Methy	1.84684	Methy	2.80238	Methy	1.78176	Methy	1.07272	Margin	-0.0943946	Methy	2.38444	Methy	2.45185	Methy	2.58873	Methy	2.69444
cg02742418	12	127846341	SLC15A4	NM_145648	Body	Island	SLE	Methy	3.02675	Methy	2.43251	Methy	4.00562	Methy	2.79753	Methy	2.18709	Unmethy	-2.24676	Methy	3.41371	Methy	3.68335	Methy	3.63704	Methy	3.65563
cg24102222	12	127846402	SLC15A4	NM_145648	Body	Island	SLE	Margin	0.188524	Margin	0.0351548	Methy	1.06269	Margin	-0.382695	Unmethy	-1.94892	Unmethy	-3.76784	Margin	0.204506	Margin	0.363347	Margin	0.502287	Margin	0.53557
cg06653632	12	127847397	SLC15A4	NM_145648	Body	S_Shore	SLE	Methy	2.01731	Methy	1.71332	Methy	3.10148	Margin	0.712156	Margin	-0.319454	Margin	0.931286	Methy	2.78825	Methy	2.73825	Methy	2.98843	Methy	3.21355
cg09001549	12	127847407	SLC15A4	NM_145648	Body	S_Shore	SLE	Methy	2.02969	Methy	1.3971	Methy	4.28887	Margin	0.655966	Margin	-0.245219	Margin	0.608385	Methy	4.18497	Methy	4.18888	Methy	4.26593	Methy	4.7748
cg02555727	12	127847499	SLC15A4	NM_145648	Body	S_Shore	SLE	Methy	2.22548	Methy	1.9872	Methy	2.79768	Methy	1.16155	Margin	0.287152	Methy	1.44849	Methy	2.63883	Methy	2.65603	Methy	2.68976	Methy	2.74825
cg09035930	12	127848010	SLC15A4	NM_145648	Body	S_Shore	SLE	Methy	1.69297	Methy	1.75034	Methy	2.18796	Methy	1.10042	Margin	0.188867	Margin	-0.00255577	Methy	1.9658	Methy	1.86534	Methy	1.95073	Methy	2.21415
cg21830849	12	127849439	SLC15A4	NM_145648	Body	S_Shelf	SLE	Methy	3.15113	Methy	3.18905	Methy	3.58406	Methy	3.38362	Methy	3.16878	Margin	0.963906	Methy	3.27239	Methy	3.13426	Methy	3.4657	Methy	3.34496
cg24301247	12	127861602	SLC15A4	NM_145648	Body	NA	SLE	Methy	2.32158	Methy	1.66717	Methy	2.62928	Methy	2.80095	Methy	1.86695	Margin	-0.191906	Margin	-0.527735	Methy	2.94543	Methy	3.05671	Methy	3.10357
cg23521905	12	127864643	SLC15A4;MGC16384	NM_145648;NR_026666	Body;Body	NA	SLE	Methy	2.3434	Methy	1.60058	Methy	2.4256	Margin	0.380735	Margin	-1.49425	Margin	0.116124	Methy	3.22582	Methy	2.84318	Methy	3.12339	Methy	3.44433
cg15324978	12	127864712	SLC15A4;MGC16384	NM_145648;NR_026666	Body;Body	NA	SLE	Methy	3.83913	Methy	2.86852	Methy	5.3672	Methy	2.25246	Margin	0.639335	Methy	1.93975	Methy	5.09746	Methy	5.16926	Methy	5.21248	Methy	5.56907
cg05253716	12	127865285	SLC15A4;MGC16384	NM_145648;NR_026666	Body;TSS200	NA	SLE	Methy	3.26516	Methy	3.09142	Methy	3.61792	Methy	3.14687	Margin	0.972034	Methy	3.6912	Methy	3.32728	Methy	3.42233	Methy	3.47107	Methy	3.52007
cg13617280	12	127865415	SLC15A4;MGC16384	NM_145648;NR_026666	Body;TSS200	NA	SLE	Methy	2.47982	Methy	2.4537	Methy	3.90039	Methy	2.32345	Margin	-1.65879	Methy	3.67125	Methy	4.19445	Methy	2.70619	Methy	2.65525	Methy	3.36689
cg16316183	12	127865418	SLC15A4;MGC16384	NM_145648;NR_026666	Body;TSS200	NA	SLE	Methy	2.52772	Methy	3.04463	Methy	3.57815	Methy	3.14454	Margin	0.716563	Methy	3.83696	Methy	3.14158	Methy	1.89645	Methy	1.90554	Methy	2.58527
cg24410690	12	127865434	SLC15A4;MGC16384	NM_145648;NR_026666	Body;TSS200	NA	SLE	Methy	3.27662	Methy	3.44216	Methy	3.88218	Methy	3.24194	Margin	0.92412	Methy	3.72115	Methy	3.67877	Methy	3.43508	Methy	3.49518	Methy	3.71989
cg17288256	12	127866673	MGC16384;SLC15A4	NR_026666;NM_145648	TSS1500;Body	NA	SLE	Methy	1.63055	Methy	2.10309	Methy	2.61868	Methy	2.07435	Methy	1.27866	Methy	1.34136	Methy	2.28018	Methy	0.947329	Margin	0.730563	Margin	-0.262079
cg19717347	12	127870909	SLC15A4	NM_145648	Body	N_Shelf	SLE	Margin	-0.0652637	Methy	1.62277	Methy	3.14275	Methy	3.64976	Methy	2.76547	Methy	1.38693	Margin	0.0653666	Unmethy	-2.25345	Unmethy	-2.29639	Margin	-1.49033
cg03751906	12	127873753	SLC15A4	NM_145648	Body	N_Shore	SLE	Margin	-1.86046	Unmethy	-1.97623	Unmethy	-1.82412	Unmethy	-2.47437	Unmethy	-2.31291	Unmethy	-2.25557	Margin	-1.53774	Margin	-1.68546	Unmethy	-1.82416	Unmethy	-1.60729
cg16444942	12	127875070	SLC15A4	NM_145648	TSS1500	S_Shore	SLE	Unmethy	-2.19235	Unmethy	-2.00223	Margin	-1.51087	Margin	-1.77747	Unmethy	-2.00362	Unmethy	-2.32949	Unmethy	-2.73901	Unmethy	-2.70095	Unmethy	-2.50402	Unmethy	-2.71107
cg01356908	12	127875109	SLC15A4	NM_145648	TSS1500	S_Shore	SLE	Unmethy	-2.14188	Unmethy	-1.91657	Margin	-1.61436	Margin	-1.6837	Margin	-1.81819	Unmethy	-2.09917	Unmethy	-2.37813	Unmethy	-2.57615	Unmethy	-2.58988	Unmethy	-2.49536
cg19777783	12	127875329	SLC15A4	NM_145648	TSS1500	S_Shore	SLE	Methy	1.60824	Methy	1.90527	Methy	2.18478	Methy	2.40852	Methy	2.07798	Margin	0.818175	Methy	1.43627	Methy	1.39719	Methy	1.49078	Methy	1.39922
cg10982031	12	127896342	NA	NA	NA	Island	SLE	Margin	0.620958	Margin	0.960928	Methy	1.06458	Methy	1.0972	Methy	1.02843	Margin	1.07155	Margin	0.491301	Margin	0.457481	Margin	0.56524	Margin	0.79042
cg20033981	13	40488153	ELF1	NM_172373	5'UTR	NA	SLE	Margin	-1.47431	Margin	-1.58523	Unmethy	-2.24455	Margin	-1.93169	Margin	-1.19652	Unmethy	-2.07483	Margin	-1.82797	Margin	-1.5695	Unmethy	-1.58322	Unmethy	-2.34814
cg25878131	13	40492509	ELF1	NM_172373	TSS1500	NA	SLE	Methy	2.46713	Methy	3.12134	Methy	3.20708	Methy	3.19383	Methy	3.56844	Methy	3.36435	Methy	2.24229	Methy	2.32892	Methy	1.92136	Margin	0.361005
cg20023102	13	78953050	NDFIP2;NDFIP2	NM_001161407;NM_019080	TSS1500;TSS1500	N_Shore	T2D	Margin	-1.25792	Margin	-1.37499	Unmethy	-1.6681	Margin	-1.29858	Margin	-1.07892	Margin	-1.56287	Margin	-1.42925	Margin	-1.47799	Margin	-1.49391	Unmethy	-1.70733
cg19714332	13	78956899	NDFIP2;NDFIP2	NM_001161407;NM_019080	Body;Body	S_Shelf	T2D	Methy	2.74662	Methy	3.11898	Methy	3.06831	Methy	3.21993	Methy	3.45622	Methy	3.34669	Methy	3.04795	Methy	2.50104	Methy	1.8704	Margin	-0.0176891
cg11770323	13	78964033	NDFIP2;NDFIP2	NM_001161407;NM_019080	Body;Body	NA	T2D	Methy	2.27945	Methy	2.11254	Methy	1.16966	Methy	3.15669	Methy	3.1857	Methy	3.03799	Methy	2.51918	Methy	2.25458	Methy	1.26279	Margin	-1.48899
cg20867475	13	79071720	NA	NA	NA	NA	T2D	Margin	0.883885	Margin	0.810364	Margin	0.861656	Margin	0.591119	Margin	0.67144	Margin	0.896819	Methy	0.801009	Methy	0.875916	Margin	0.864368	Margin	0.756284
cg05600496	13	79255188	NA	NA	NA	NA	T2D	Margin	0.136139	Methy	1.16855	Methy	1.78362	Methy	1.52017	Margin	0.20063	Methy	1.51419	Margin	0.473033	Margin	-0.505632	Margin	-0.376615	Margin	0.286549
cg16505704	13	79276332	NA	NA	NA	NA	T2D	Methy	1.23801	Methy	1.60152	Methy	2.68931	Methy	2.55085	Margin	0.299801	Methy	2.26221	Margin	-0.0489806	Methy	0.765216	Methy	0.910902	Methy	1.60388
cg05969360	13	79341436	NA	NA	NA	NA	T2D	Methy	1.67234	Margin	0.849095	Margin	-1.23904	Margin	-0.939724	Margin	0.504988	Methy	2.80728	Methy	2.93599	Methy	2.73757	Methy	2.2538	Methy	1.77505
cg08323299	13	79461029	NA	NA	NA	NA	T2D	Methy	1.76597	Methy	1.56616	Methy	1.17112	Margin	0.530554	Margin	0.70839	Margin	0.951927	Methy	2.28071	Methy	2.08565	Methy	2.51403	Methy	2.69179
cg05317600	13	79510157	NA	NA	NA	NA	T2D	Methy	2.07131	Methy	1.06431	Methy	1.6126	Methy	1.68024	Methy	1.18376	Margin	1.02667	Margin	-1.75576	Methy	2.52802	Methy	2.21251	Margin	0.52001
cg09015280	13	79521162	NA	NA	NA	NA	T2D	Unmethy	-1.9001	Unmethy	-1.87869	Unmethy	-1.85941	Margin	-1.93223	Unmethy	-1.99559	Unmethy	-1.95397	Unmethy	-2.33393	Unmethy	-2.11302	Unmethy	-2.16889	Unmethy	-2.1883
cg16766325	13	79810907	SPRY2	NM_005842	5'UTR	N_Shore	T2D	Margin	-1.56988	Margin	-1.40907	Margin	-1.51764	Margin	-0.943247	Margin	-1.36557	Margin	-0.910255	Unmethy	-2.18492	Unmethy	-2.23211	Unmethy	-2.26933	Unmethy	-2.27643
cg08421519	13	79811449	SPRY2	NM_005842	5'UTR	Island	T2D	Margin	-1.67441	Margin	-1.4563	Unmethy	-1.65402	Margin	-1.57722	Margin	-1.75761	Margin	-1.64036	Unmethy	-2.00887	Margin	-1.64528	Unmethy	-1.88562	Unmethy	-1.74245
cg02424715	14	74963433	JDP2;JDP2;JDP2	NM_001135047;NM_001135048;NM_130469	TSS1500;TSS1500;TSS1500	N_Shore	RA	Methy	1.25893	Margin	0.844588	Methy	0.993349	Methy	2.29886	Methy	1.82966	Unmethy	-1.96081	Margin	-0.341146	Methy	1.69791	Methy	1.68456	Methy	1.52814
cg10101773	14	74963889	JDP2;JDP2;JDP2	NM_001135047;NM_001135048;NM_130469	TSS1500;TSS1500;TSS1500	N_Shore	RA	Margin	-1.62694	Margin	-0.91298	Margin	-0.197877	Margin	0.102619	Margin	-0.385541	Unmethy	-4.1246	Unmethy	-4.05832	Unmethy	-3.74217	Unmethy	-4.15524	Unmethy	-4.79474
cg02114084	14	74963962	JDP2;JDP2;JDP2	NM_001135047;NM_001135048;NM_130469	TSS1500;TSS1500;TSS1500	N_Shore	RA	Margin	-1.30476	Margin	-0.673114	Margin	-0.0260442	Margin	0.167923	Margin	-0.398598	Unmethy	-3.17233	Unmethy	-3.20509	Unmethy	-2.74037	Unmethy	-3.40077	Unmethy	-3.56435
cg10444281	14	74965221	JDP2;JDP2;JDP2	NM_001135048;NM_130469;NM_001135047	5'UTR;5'UTR;5'UTR	Island	RA	Margin	-1.5395	Margin	-1.43545	Margin	-1.13375	Margin	-1.00009	Margin	-1.24137	Margin	-1.49655	Unmethy	-2.34862	Unmethy	-2.2344	Unmethy	-2.32932	Unmethy	-2.35556
cg22143352	14	74967594	JDP2;JDP2;JDP2;JDP2	NM_001135048;NM_130469;NM_001135047;NM_001135049	5'UTR;5'UTR;5'UTR;TSS1500	S_Shelf	RA	Margin	0.328011	Methy	1.14615	Methy	2.04394	Methy	1.18652	Margin	0.280583	Methy	2.49903	Margin	0.51496	Margin	-0.281532	Margin	-0.516994	Unmethy	-1.63844
cg15513708	14	74974396	JDP2;JDP2;JDP2;JDP2	NM_001135047;NM_001135049;NM_001135048;NM_130469	Body;Body;Body;Body	NA	RA	Margin	0.906709	Methy	2.18692	Methy	2.57814	Methy	2.39375	Methy	2.43098	Methy	2.86993	Methy	2.03898	Margin	0.436381	Margin	0.80642	Methy	1.98142
cg24677302	14	74991916	JDP2;JDP2;JDP2;JDP2	NM_001135047;NM_001135049;NM_001135048;NM_130469	Body;Body;Body;Body	NA	RA	Methy	1.34857	Methy	2.11385	Methy	2.58563	Methy	2.18019	Methy	1.89331	Methy	2.79701	Methy	2.0382	Methy	0.810761	Margin	0.384683	Unmethy	-1.76249
cg22780612	14	75005845	JDP2;JDP2;JDP2;JDP2	NM_001135047;NM_001135049;NM_001135048;NM_130469	Body;Body;Body;Body	NA	RA	Methy	6.61453	Unmethy	6.25881	Unmethy	6.47626	Unmethy	6.4281	Unmethy	6.03753	Methy	6.1194	Methy	6.67758	Methy	6.61997	Unmethy	6.5714	Unmethy	6.40316
cg04407490	14	75006335	JDP2;JDP2;JDP2;JDP2	NM_001135049;NM_001135048;NM_130469;NM_001135047	3'UTR;3'UTR;3'UTR;3'UTR	NA	RA	Methy	1.56735	Methy	1.47108	Methy	1.52762	Methy	0.999559	Methy	1.08487	Margin	0.416192	Methy	2.0021	Methy	1.63856	Methy	1.8305	Methy	2.01472
cg21048162	14	75058109	BATF	NM_006399	TSS1500	NA	RA	Margin	0.183375	Margin	-0.525412	Unmethy	-2.50827	Unmethy	-3.02488	Margin	-1.43596	Margin	0.201668	Margin	0.628216	Margin	0.472311	Margin	0.341557	Margin	-0.704718
cg24673600	14	75075682	BATF	NM_006399	Body	NA	RA	Methy	2.61	Methy	2.11455	Methy	1.47399	Methy	2.05898	Methy	2.8121	Margin	0.212181	Methy	3.58988	Methy	3.52176	Methy	3.83295	Methy	3.97134
cg01515732	14	75082680	BATF	NM_006399	Body	Island	RA	Methy	5.78915	Methy	5.70557	Unmethy	6.14277	Unmethy	6.15897	Unmethy	6.17165	Methy	6.25574	Methy	6.22645	Methy	5.77205	Methy	5.93819	Margin	6.37086
cg18576044	14	75085422	NA	NA	NA	S_Shelf	RA	Margin	0.143927	Margin	-0.780049	Margin	-0.705953	Margin	-0.684246	Margin	-1.18302	Margin	-1.08993	Margin	-1.45475	Methy	0.787495	Margin	0.530909	Margin	0.705953
cg00992253	14	100187274	NA	NA	NA	N_Shelf	T2D	Margin	0.702686	Methy	1.22246	Methy	1.49769	Methy	1.42283	Methy	1.37674	Methy	1.54651	Methy	0.777042	Margin	0.293517	Margin	0.493468	Margin	0.738834
cg01050273	14	100190458	NA	NA	NA	N_Shore	T2D	Methy	1.26868	Methy	1.07639	Margin	0.752606	Methy	1.0499	Methy	1.42944	Margin	-0.318418	Methy	1.26968	Methy	1.21045	Methy	1.42565	Methy	1.13377
cg14282221	14	100190771	NA	NA	NA	Island	T2D	Unmethy	-2.26083	Unmethy	-2.10078	Unmethy	-2.03253	Margin	-1.43111	Margin	-1.88884	Unmethy	-1.80564	Unmethy	-2.72458	Unmethy	-2.72887	Unmethy	-2.78899	Unmethy	-2.90184
cg19741273	14	100193016	C14orf70	NR_024096	TSS1500	S_Shore	T2D	Margin	0.869609	Methy	1.91335	Methy	2.35236	Methy	2.36297	Methy	2.3199	Methy	2.24132	Methy	1.34537	Margin	0.141671	Margin	0.390534	Methy	1.1914
cg23528142	14	100193289	C14orf70	NR_024096	TSS200	S_Shelf	T2D	Methy	5.70992	Unmethy	6.09708	Methy	5.65868	Unmethy	6.10946	Unmethy	5.85316	Methy	6.16158	Methy	5.81354	Methy	5.51889	Methy	5.88185	Methy	5.87596
cg00859280	14	100206821	C14orf70	NR_024096	Body	NA	T2D	Unmethy	-2.26843	Unmethy	-2.0172	Unmethy	-1.73516	Margin	-1.85867	Unmethy	-1.99752	Unmethy	-2.14063	Unmethy	-2.71036	Unmethy	-2.45304	Unmethy	-2.24845	Unmethy	-2.13054
cg11806439	14	100227703	NA	NA	NA	NA	T2D	Methy	5.848	Unmethy	6.01333	Margin	5.95184	Margin	5.71748	Unmethy	5.9332	Methy	5.89986	Methy	5.68439	Methy	5.82127	Margin	6.22132	Methy	6.00864
cg03548062	14	100228004	NA	NA	NA	NA	T2D	Methy	5.9592	Unmethy	6.21999	Margin	6.05139	Unmethy	5.89923	Unmethy	6.21763	Methy	6.16475	Methy	6.06903	Methy	6.15735	Margin	6.17241	Margin	6.20687
cg23315424	14	100231774	NA	NA	NA	NA	T2D	Margin	0.888394	Methy	1.10393	Methy	1.36774	Methy	1.19485	Methy	1.07064	Methy	1.5605	Methy	0.723955	Methy	0.765835	Margin	0.847493	Margin	0.828859
cg18684879	14	100245270	NA	NA	NA	Island	T2D,T1D	Margin	0.547732	Margin	0.841513	Margin	0.817707	Margin	0.639004	Margin	0.736819	Margin	0.789041	Methy	0.840156	Margin	0.448288	Margin	0.53181	Margin	0.734384
cg18089426	14	100245723	NA	NA	NA	Island	T2D,T1D	Margin	0.69602	Margin	0.979355	Methy	1.15093	Methy	1.35283	Methy	1.01354	Methy	1.28105	Margin	0.574595	Margin	0.510126	Margin	0.667332	Margin	0.596759
cg18122767	14	100261625	DLK1	NM_003836	TSS1500	N_Shore	T2D,T1D	Methy	0.971346	Margin	0.605536	Margin	0.255733	Margin	0.0362336	Margin	0.0428973	Margin	0.2561	Methy	1.73606	Methy	1.55711	Methy	1.70271	Methy	1.75933
cg10528576	14	100262666	DLK1	NM_003836	TSS1500	Island	T2D,T1D	Margin	0.407456	Methy	1.1127	Margin	0.617175	Methy	1.33333	Margin	0.404942	Methy	1.41265	Margin	-0.3046	Margin	0.291598	Margin	-0.283169	Margin	-0.0967562
cg21575295	14	100263185	DLK1	NM_003836	1stExon	Island	T2D,T1D	Unmethy	-2.3756	Unmethy	-2.31311	Unmethy	-2.25174	Unmethy	-2.14398	Unmethy	-2.29851	Margin	-1.68585	Unmethy	-2.74795	Unmethy	-2.70578	Unmethy	-2.80365	Unmethy	-2.81404
cg09971646	14	100263898	DLK1	NM_003836	Body	S_Shore	T2D,T1D	Margin	-0.284995	Margin	0.563259	Margin	0.929134	Methy	0.960463	Margin	0.766356	Margin	0.961943	Margin	0.0518867	Margin	-1.50992	Margin	-1.37852	Margin	-1.18442
cg18279536	14	100264501	DLK1	NM_003836	Body	S_Shore	T2D,T1D	Margin	0.624216	Margin	0.708793	Margin	0.63158	Margin	0.172371	Margin	0.342625	Margin	0.795051	Methy	0.907212	Methy	0.810577	Margin	0.89411	Methy	0.969827
cg01983373	14	100265883	DLK1	NM_003836	Body	S_Shelf	T2D,T1D	Margin	0.655898	Margin	0.748799	Margin	0.553232	Margin	0.0718038	Margin	0.148322	Margin	0.803099	Methy	1.02461	Methy	0.835654	Margin	0.76856	Margin	0.40193
cg18085033	14	100268536	DLK1	NM_003836	Body	N_Shore	T2D,T1D	Methy	5.48703	Unmethy	5.98297	Methy	5.74575	Methy	4.94718	Methy	4.86978	Methy	5.53393	Methy	5.14117	Methy	5.20515	Methy	5.22747	Methy	5.04321
cg17916177	14	100273733	NA	NA	NA	S_Shelf	T2D,T1D	Methy	1.43169	Methy	1.03831	Margin	0.760118	Margin	0.354282	Margin	0.331335	Margin	0.783068	Methy	1.99874	Methy	1.99974	Methy	2.23501	Methy	2.29325
cg02954563	14	100283300	NA	NA	NA	NA	T1D	Margin	-0.14873	Margin	0.895643	Margin	0.904332	Margin	0.245553	Margin	0.390681	Margin	1.15452	Methy	0.819375	Margin	-0.832606	Margin	-0.488559	Margin	-0.153594
cg13519191	14	100298759	NA	NA	NA	NA	T1D	Methy	2.49651	Methy	1.44175	Margin	0.913126	Margin	0.276014	Margin	0.595621	Margin	0.706391	Methy	3.31555	Methy	3.1896	Methy	3.3941	Methy	3.12471
cg02313552	14	100361041	MEG3;MEG3;MEG3	NR_002766;NR_003531;NR_003530	TSS1500;TSS1500;TSS1500	N_Shore	T1D	Margin	0.90087	Methy	1.12231	Methy	1.02809	Methy	1.07504	Methy	1.11478	Methy	1.24213	Methy	0.901374	Methy	1.0506	Margin	0.852343	Margin	0.851773
cg02888166	14	100361193	MEG3;MEG3;MEG3	NR_002766;NR_003531;NR_003530	TSS1500;TSS1500;TSS1500	N_Shore	T1D	Margin	0.666073	Margin	0.765908	Margin	0.781148	Margin	0.762628	Margin	0.635571	Margin	0.744081	Margin	0.639916	Methy	0.698178	Margin	0.599234	Margin	0.681419
cg10065153	14	100361355	MEG3;MEG3;MEG3	NR_002766;NR_003531;NR_003530	TSS1500;TSS1500;TSS1500	N_Shore	T1D	Margin	0.891519	Methy	1.03481	Margin	0.732223	Margin	0.699569	Methy	1.09767	Margin	0.987848	Methy	0.736473	Methy	0.711869	Margin	0.637617	Margin	0.839457
cg04576764	14	100361902	MEG3;MEG3;MEG3	NR_002766;NR_003531;NR_003530	TSS1500;TSS1500;TSS1500	Island	T1D	Margin	0.678343	Margin	0.636499	Margin	0.677522	Margin	0.667705	Margin	0.687416	Margin	0.784593	Methy	0.722137	Methy	0.754107	Margin	0.682132	Margin	0.67938
cg09926418	14	100362145	MEG3;MEG3;MEG3	NR_003531;NR_002766;NR_003530	TSS200;TSS200;TSS200	Island	T1D	Margin	0.751869	Margin	0.927922	Margin	0.825393	Margin	0.688328	Margin	0.900761	Margin	1.0385	Methy	0.794577	Methy	0.793031	Margin	0.768769	Margin	0.754062
cg09285543	14	100365887	MEG3;MEG3;MEG3	NR_003531;NR_003530;NR_002766	Body;Body;Body	S_Shore	T1D	Methy	2.11796	Methy	1.63522	Methy	1.60675	Margin	0.553769	Margin	0.650899	Margin	1.06214	Methy	2.61141	Methy	2.57652	Methy	2.63768	Methy	2.96832
cg24183098	14	100366050	MEG3;MEG3;MEG3	NR_003531;NR_003530;NR_002766	Body;Body;Body	S_Shore	T1D	Methy	2.27588	Methy	1.9914	Methy	2.01224	Methy	1.70427	Methy	1.59886	Margin	0.305252	Methy	2.45241	Methy	2.69269	Methy	2.89786	Methy	2.77161
cg24757755	14	100374003	MEG3;MEG3;MEG3	NR_003531;NR_003530;NR_002766	Body;Body;Body	NA	T1D	Methy	1.43626	Methy	1.02968	Margin	0.668034	Margin	0.162066	Margin	0.270068	Margin	0.779655	Methy	1.65916	Methy	1.92411	Methy	2.12028	Methy	2.12599
cg08294662	14	100381587	MEG3;MEG3;MEG3	NR_003531;NR_003530;NR_002766	Body;Body;Body	NA	T1D	Methy	2.65747	Methy	2.05833	Methy	1.93057	Margin	0.775265	Margin	0.933936	Methy	1.19369	Methy	3.24449	Methy	3.88748	Methy	4.14091	Methy	4.25046
cg01022345	14	100387572	MIR770;MEG3;MEG3;MEG3	NR_030528;NR_003531;NR_003530;NR_002766	TSS1500;Body;Body;Body	NA	T1D	Margin	0.889465	Methy	1.13291	Methy	1.27081	Methy	1.12338	Methy	1.29024	Margin	1.00023	Methy	0.925933	Methy	0.77893	Methy	0.923134	Margin	0.826133
cg24721750	14	100418199	MIR127;RTL1	NR_029696;NM_001134888	TSS1500;1stExon	Island	T1D	Methy	5.95637	Unmethy	6.21019	Methy	5.58401	Unmethy	5.82227	Unmethy	6.22862	Methy	5.90384	Methy	6.18469	Methy	5.8758	Methy	6.0187	Methy	5.89377
cg00941900	14	100427354	NA	NA	NA	NA	T1D	Methy	1.94484	Methy	1.54838	Methy	1.08487	Margin	0.588896	Margin	0.778416	Margin	1.10996	Methy	2.44291	Methy	2.39903	Methy	2.5088	Methy	2.47509
cg26325174	14	100430440	MEG8	NR_024149	TSS1500	NA	T1D	Margin	0.818276	Margin	0.675547	Margin	0.497445	Margin	0.0690738	Margin	0.21044	Margin	0.728581	Methy	1.31323	Methy	1.1137	Methy	1.28292	Methy	1.16073
cg00166915	14	100431112	MEG8	NR_024149	Body	NA	T1D	Methy	2.01186	Methy	1.59133	Methy	1.38592	Margin	0.776582	Margin	0.955594	Methy	1.5347	Methy	2.36409	Methy	2.31683	Methy	2.58665	Methy	2.61191
cg15811668	14	100436121	MEG8	NR_024149	Body	NA	T1D	Unmethy	-2.20146	Unmethy	-2.17243	Margin	-1.20637	Margin	-1.76364	Unmethy	-1.97671	Unmethy	-2.11999	Unmethy	-2.5154	Unmethy	-2.09327	Unmethy	-2.42101	Unmethy	-2.40149
cg20560169	14	101096036	DIO3	NM_001362	TSS1500	Island	T1D	Unmethy	-2.71808	Unmethy	-2.75559	Unmethy	-2.75815	Margin	-1.73409	Unmethy	-2.26565	Unmethy	-1.96208	Unmethy	-3.67201	Unmethy	-3.5211	Unmethy	-3.56042	Unmethy	-3.65793
cg04818710	14	101096047	DIO3	NM_001362	TSS1500	Island	T1D	Unmethy	-2.58807	Unmethy	-2.52235	Unmethy	-2.6559	Margin	-1.85328	Unmethy	-2.25437	Unmethy	-1.99159	Unmethy	-2.74279	Unmethy	-2.92341	Unmethy	-2.87816	Unmethy	-3.01571
cg04623955	14	101096129	DIO3	NM_001362	TSS1500	Island	T1D	Margin	-1.87074	Unmethy	-1.75291	Unmethy	-1.69216	Margin	-1.44901	Margin	-1.64907	Margin	-1.49182	Unmethy	-2.28041	Unmethy	-2.30993	Unmethy	-2.17168	Unmethy	-2.19809
cg18301891	14	101096925	DIO3;MIR1247	NM_001362;NR_031649	TSS1500;TSS1500	Island	T1D	Unmethy	-4.09429	Unmethy	-3.39181	Unmethy	-4.6866	Margin	-1.8756	Unmethy	-2.4036	Unmethy	-2.32279	Unmethy	-5.45031	Unmethy	-4.80125	Unmethy	-5.58646	Unmethy	-6.0134
cg02287710	14	101097413	DIO3;MIR1247	NM_001362;NR_031649	TSS200;TSS1500	Island	T1D	Margin	-0.768487	Margin	-0.366224	Margin	-0.649948	Margin	0.298376	Margin	0.154596	Margin	0.256407	Margin	-1.7862	Margin	-1.56269	Unmethy	-1.81468	Unmethy	-2.00144
cg00741900	14	101097550	DIO3;DIO3;MIR1247	NM_001362;NM_001362;NR_031649	5'UTR;1stExon;TSS1500	Island	T1D	Margin	-1.16389	Margin	-0.755217	Margin	-0.806087	Margin	-0.566773	Margin	-0.556122	Margin	-0.590559	Margin	-1.60839	Margin	-1.48007	Unmethy	-1.54505	Unmethy	-1.60563
cg01877260	15	36632775	RASGRP1;RASGRP1	NM_001128602;NM_005739	Body;Body	NA	T1D	Methy	2.18155	Methy	2.85447	Methy	3.24611	Methy	3.03384	Methy	3.44292	Methy	3.2344	Methy	3.04043	Methy	1.51213	Methy	1.42447	Unmethy	-1.60785
cg27220062	15	36635963	RASGRP1;RASGRP1	NM_001128602;NM_005739	Body;Body	NA	T1D	Margin	0.627657	Margin	0.346404	Margin	-0.733284	Margin	-0.497435	Margin	-1.24379	Methy	1.44168	Methy	1.31183	Methy	1.0716	Margin	0.707437	Unmethy	-1.82849
cg23525051	15	36639972	RASGRP1;RASGRP1	NM_001128602;NM_005739	Body;Body	N_Shelf	T1D	Methy	2.48685	Methy	1.72268	Margin	0.937581	Margin	0.829524	Methy	1.5409	Methy	2.62757	Methy	3.25042	Methy	3.08518	Methy	2.66534	Methy	1.56125
cg24174608	15	36643386	RASGRP1;RASGRP1	NM_001128602;NM_005739	Body;Body	N_Shore	T1D	Margin	-0.783099	Margin	-1.06684	Unmethy	-2.5654	Unmethy	-3.77843	Unmethy	-1.96952	Margin	-1.02886	Margin	-0.316717	Margin	-0.5315	Margin	-0.712712	Unmethy	-2.20025
cg10533331	15	36644987	RASGRP1;RASGRP1	NM_001128602;NM_005739	TSS1500;TSS1500	S_Shore	T1D	Methy	2.42877	Methy	2.08104	Margin	0.971876	Methy	2.44093	Methy	1.89917	Methy	2.89694	Methy	2.11366	Methy	2.37718	Methy	1.57427	Margin	0.373044
cg20918537	15	49700912	DMXL2	NM_015263	Body	N_Shore	Asthma	Methy	1.18464	Methy	1.85178	Methy	2.33532	Methy	2.28317	Methy	2.36597	Methy	2.13631	Methy	0.921985	Methy	0.74933	Margin	0.796011	Margin	-0.317597
cg21847800	15	49760516	SCG3;SCG3	NM_013243;NM_001165257	TSS1500;TSS1500	N_Shore	Asthma	Methy	1.04277	Methy	1.05787	Methy	1.30674	Methy	1.1537	Methy	1.41454	Methy	1.44336	Methy	0.922181	Methy	0.885383	Margin	0.802397	Methy	1.0812
cg20544651	15	49760826	SCG3;SCG3	NM_013243;NM_001165257	TSS200;TSS200	Island	Asthma	Margin	-1.34179	Margin	-1.39278	Margin	-1.50289	Margin	-1.39497	Margin	-1.39378	Margin	-1.30008	Margin	-1.75349	Margin	-1.56273	Unmethy	-1.58321	Unmethy	-1.60795
cg01908954	15	49761056	SCG3;SCG3;SCG3;SCG3	NM_001165257;NM_013243;NM_013243;NM_001165257	5'UTR;1stExon;5'UTR;1stExon	Island	Asthma	Unmethy	-1.9861	Margin	-1.41891	Margin	-1.45022	Margin	-0.896859	Margin	-1.03996	Margin	-0.418825	Unmethy	-2.86591	Unmethy	-2.72935	Unmethy	-2.80426	Unmethy	-2.90934
cg16717122	15	49761212	SCG3;SCG3;SCG3;SCG3	NM_001165257;NM_013243;NM_013243;NM_001165257	5'UTR;1stExon;5'UTR;1stExon	S_Shore	Asthma	Margin	-1.38155	Margin	-1.31826	Margin	-1.42942	Margin	-1.14532	Margin	-1.1906	Margin	-1.02956	Margin	-1.73943	Margin	-1.65978	Unmethy	-1.67383	Unmethy	-1.65452
cg02391922	15	58624569	RORA;RORA;RORA;RORA	NM_002943;NM_134261;NM_134262;NM_134260	Body;Body;Body;Body	NA	Asthma	Methy	1.81094	Methy	1.41544	Margin	0.820438	Margin	0.548601	Margin	0.254946	Methy	2.64684	Methy	2.37818	Methy	2.26658	Methy	2.48565	Methy	2.67529
cg19620383	15	58648059	RORA;RORA;RORA;RORA	NM_002943;NM_134261;NM_134262;NM_134260	Body;Body;Body;Body	NA	Asthma	Margin	0.638517	Margin	-0.0317133	Margin	-0.593058	Unmethy	-2.81397	Margin	-1.27496	Margin	-0.525017	Methy	1.30544	Methy	1.11108	Methy	1.2527	Methy	1.41285
cg02404349	15	58649548	RORA;RORA;RORA;RORA	NM_002943;NM_134261;NM_134262;NM_134260	Body;Body;Body;Body	NA	Asthma	Methy	2.74134	Methy	1.86461	Margin	0.514139	Methy	1.01585	Methy	1.51598	Methy	3.98461	Methy	3.66761	Methy	3.66783	Methy	4.043	Methy	4.01245
cg19667460	15	58650671	RORA;RORA;RORA;RORA	NM_002943;NM_134261;NM_134262;NM_134260	Body;Body;Body;Body	NA	Asthma	Methy	1.52761	Margin	0.491997	Unmethy	-1.7753	Unmethy	-2.58637	Margin	-1.57787	Methy	3.23133	Methy	2.81498	Methy	2.51501	Methy	2.59049	Methy	2.84435
cg23411013	15	58655441	RORA;RORA;RORA;RORA	NM_002943;NM_134261;NM_134262;NM_134260	Body;Body;Body;Body	NA	Asthma	Margin	-0.565957	Margin	-0.211247	Margin	0.577645	Margin	-0.055953	Unmethy	-2.04148	Margin	0.240656	Margin	-1.35474	Margin	-1.16508	Margin	-0.950113	Margin	-0.589885
cg23074881	15	58660150	RORA;RORA;RORA;RORA	NM_002943;NM_134261;NM_134262;NM_134260	Body;Body;Body;Body	NA	Asthma	Methy	1.50852	Margin	0.358155	Unmethy	-1.94244	Unmethy	-3.42138	Margin	-1.58958	Methy	1.77804	Methy	2.74235	Methy	2.56749	Methy	2.83424	Methy	3.06627
cg02189597	15	58668363	RORA;RORA;RORA;RORA	NM_002943;NM_134261;NM_134262;NM_134260	Body;Body;Body;Body	N_Shelf	Asthma	Methy	2.1437	Methy	1.51771	Margin	0.924455	Margin	0.304535	Margin	-0.69718	Methy	2.89632	Methy	3.15173	Methy	2.64544	Methy	2.94903	Methy	3.2233
cg22390633	15	58672525	RORA;RORA;RORA;RORA	NM_002943;NM_134261;NM_134262;NM_134260	Body;Body;TSS1500;Body	Island	Asthma	Unmethy	-2.23839	Unmethy	-2.05079	Margin	-1.53719	Margin	-1.75064	Unmethy	-2.50284	Unmethy	-2.28639	Unmethy	-2.58198	Unmethy	-2.65888	Unmethy	-2.48823	Unmethy	-2.66679
cg16799334	15	58672630	RORA;RORA;RORA;RORA	NM_002943;NM_134261;NM_134262;NM_134260	Body;Body;TSS1500;Body	Island	Asthma	Margin	-1.33629	Margin	-1.15848	Margin	-1.09532	Margin	-0.91753	Margin	-1.34726	Margin	-1.47782	Margin	-1.6733	Margin	-1.48651	Unmethy	-1.68125	Unmethy	-1.62528
cg17181046	15	58707733	RORA;RORA;RORA	NM_002943;NM_134261;NM_134260	TSS1500;Body;TSS1500	NA	Asthma	Margin	0.736025	Margin	0.955911	Margin	0.790697	Margin	0.653644	Methy	1.00421	Margin	0.92383	Margin	0.589472	Margin	0.509603	Methy	0.975606	Methy	0.94916
cg07971790	15	58723422	RORA	NM_134261	Body	NA	Asthma	Methy	1.35431	Methy	1.18517	Methy	1.68982	Margin	0.527764	Margin	-0.315878	Methy	1.47206	Methy	1.54811	Methy	1.35676	Methy	1.4801	Methy	1.60556
cg21241560	15	58729959	RORA	NM_134261	Body	NA	Asthma	Margin	0.820726	Margin	-0.0277629	Margin	-1.63494	Unmethy	-3.00774	Margin	-1.79802	Margin	0.923987	Methy	1.36602	Methy	1.24603	Methy	1.23136	Methy	1.13046
cg15451980	15	58746929	RORA	NM_134261	Body	NA	Asthma	Methy	2.95093	Methy	2.00597	Methy	2.41762	Margin	0.192665	Unmethy	-1.93229	Methy	4.37414	Methy	4.30439	Methy	4.14657	Methy	3.77478	Methy	4.37185
cg06100161	15	58775186	RORA	NM_134261	Body	NA	Asthma	Methy	1.15404	Margin	0.77906	Margin	0.303301	Margin	-0.273837	Margin	0.531667	Methy	1.3089	Methy	2.56787	Methy	2.25661	Methy	2.46495	Methy	2.65004
cg09670601	15	58775220	RORA	NM_134261	Body	NA	Asthma	Methy	2.33471	Methy	1.56604	Margin	0.792873	Margin	0.0302148	Margin	0.818226	Methy	1.60062	Methy	3.23947	Methy	3.06037	Methy	3.50101	Methy	3.36361
cg09879458	15	58799602	RORA	NM_134261	Body	NA	Asthma	Methy	1.53996	Margin	0.811834	Margin	-1.21469	Margin	-0.0104758	Methy	1.96936	Methy	1.335	Methy	2.48318	Methy	2.37241	Methy	2.43595	Methy	2.52231
cg14720274	15	58801423	RORA	NM_134261	Body	NA	Asthma	Methy	2.5983	Methy	2.30948	Methy	1.63181	Methy	2.14589	Methy	2.36039	Margin	0.915598	Methy	2.90793	Methy	3.01704	Methy	2.89162	Methy	3.11579
cg01400040	15	58878512	RORA	NM_134261	Body	NA	Asthma	Methy	2.41921	Methy	1.61069	Margin	0.827658	Margin	0.764494	Margin	0.664169	Margin	1.14016	Methy	3.04953	Methy	3.05115	Methy	3.38158	Methy	3.50551
cg21756476	15	58970057	RORA	NM_134261	Body	NA	Asthma	Margin	0.571634	Margin	0.862537	Methy	1.93943	Margin	0.781763	Margin	-0.805851	Margin	0.806784	Margin	0.20833	Margin	0.163237	Margin	0.303123	Margin	0.05303
cg03707955	15	59024368	RORA	NM_134261	Body	NA	Asthma	Margin	0.683083	Margin	0.420539	Margin	0.313041	Margin	-0.210335	Margin	-0.461827	Margin	0.240704	Methy	1.27332	Methy	1.01564	Methy	1.15141	Methy	1.00838
cg16964728	15	59127816	RORA	NM_134261	Body	NA	Asthma	Methy	1.79588	Methy	1.46121	Methy	1.14264	Margin	0.460197	Margin	0.454968	Methy	1.19855	Methy	2.24331	Methy	2.21088	Methy	2.44814	Methy	2.28168
cg12340454	15	59306778	RORA	NM_134261	Body	N_Shore	Asthma	Unmethy	-2.18961	Unmethy	-1.90635	Unmethy	-1.8978	Margin	-1.92872	Margin	-1.86915	Unmethy	-2.00597	Unmethy	-2.50209	Unmethy	-2.59633	Unmethy	-2.43482	Unmethy	-2.49402
cg17149655	15	59309202	RORA	NM_134261	TSS1500	S_Shore	Asthma	Unmethy	-2.00921	Unmethy	-1.94017	Unmethy	-1.8438	Margin	-1.85125	Unmethy	-1.91927	Unmethy	-1.81029	Unmethy	-2.26859	Unmethy	-2.18682	Unmethy	-2.09958	Unmethy	-2.11671
cg19294311	15	60146212	C2CD4A	NM_207322	TSS1500	N_Shore	T2D	Unmethy	-2.11034	Unmethy	-1.85375	Unmethy	-2.15887	Margin	-1.43262	Margin	-1.42834	Unmethy	-2.7424	Unmethy	-2.37636	Unmethy	-2.40072	Unmethy	-2.42214	Unmethy	-2.38821
cg07006564	15	60148082	C2CD4A	NM_207322	Body	Island	T2D	Unmethy	-2.3066	Unmethy	-2.05233	Unmethy	-2.33282	Margin	-1.99952	Margin	-1.83011	Unmethy	-1.78818	Unmethy	-2.87635	Unmethy	-2.80362	Unmethy	-2.87075	Unmethy	-2.91866
cg21568661	15	60198867	NA	NA	NA	NA	T2D	Margin	-1.77582	Margin	-0.752722	Margin	-0.633289	Margin	-0.473535	Margin	-0.937344	Margin	-1.22499	Unmethy	-3.05923	Unmethy	-2.365	Unmethy	-2.22822	Unmethy	-2.01891
cg01171368	15	60243398	C2CD4B	NM_001007595	Body	Island	T2D	Margin	-1.47574	Margin	-1.45675	Margin	-1.25006	Margin	-1.60148	Margin	-1.51055	Margin	-1.43573	Margin	-1.64598	Margin	-1.54369	Unmethy	-1.54242	Unmethy	-1.54863
cg15188182	15	60244939	C2CD4B	NM_001007595	TSS200	Island	T2D	Margin	-1.84655	Unmethy	-1.78031	Margin	-1.58814	Margin	-1.8234	Margin	-1.76372	Margin	-1.50844	Unmethy	-1.97916	Unmethy	-2.08968	Unmethy	-2.15318	Unmethy	-2.31765
cg01184271	15	60244973	C2CD4B	NM_001007595	TSS200	S_Shore	T2D	Margin	-1.04599	Margin	-0.853106	Margin	-0.775401	Margin	-0.658669	Margin	-0.668108	Margin	-0.605611	Margin	-0.812865	Margin	-1.21542	Margin	-1.18396	Unmethy	-1.72629
cg03461851	15	60245175	C2CD4B	NM_001007595	TSS1500	S_Shore	T2D	Margin	-1.22986	Margin	-0.39372	Margin	-0.106679	Margin	-0.301496	Margin	-0.233528	Margin	-0.434561	Margin	-1.01193	Unmethy	-2.42572	Unmethy	-2.72196	Unmethy	-3.23985
cg10577534	15	65141514	NA	NA	NA	N_Shelf	Asthma	Margin	0.878487	Margin	0.69419	Margin	0.416897	Margin	0.653028	Margin	0.533183	Margin	1.0291	Methy	0.931629	Methy	0.874362	Methy	0.93226	Methy	0.933978
cg20356637	15	65143364	NA	NA	NA	N_Shore	Asthma	Margin	0.806309	Methy	1.13916	Margin	0.717235	Methy	1.91957	Methy	2.30687	Methy	1.37221	Methy	0.902363	Margin	0.493485	Margin	0.64421	Margin	0.624372
cg09501821	15	65143441	NA	NA	NA	N_Shore	Asthma	Margin	0.242877	Margin	0.446282	Margin	0.0956768	Margin	0.813815	Methy	1.24694	Margin	0.78749	Margin	0.0783605	Margin	-0.0687166	Margin	0.0439602	Margin	0.026376
cg13105599	15	65143695	NA	NA	NA	N_Shore	Asthma	Methy	0.99465	Methy	1.06805	Margin	0.226313	Methy	1.27541	Methy	2.09918	Methy	1.19032	Methy	0.698093	Methy	0.984238	Methy	0.92853	Margin	0.786189
cg23731272	15	65143892	SMAD3	NM_005902	TSS1500	N_Shore	Asthma	Methy	2.20365	Methy	2.16013	Margin	0.98002	Methy	2.56623	Methy	3.17949	Methy	2.01478	Methy	1.66166	Methy	1.75958	Methy	1.68214	Methy	1.55623
cg02486855	15	65143996	SMAD3	NM_005902	TSS1500	N_Shore	Asthma	Methy	1.12737	Methy	1.78827	Margin	0.917669	Methy	2.30008	Methy	2.72552	Methy	2.43995	Methy	1.2454	Methy	1.27405	Methy	1.27704	Methy	1.07182
cg07890839	15	65146579	SMAD3	NM_005902	Body	S_Shore	Asthma	Margin	-1.64353	Margin	-1.1817	Unmethy	-1.97387	Margin	-0.200475	Margin	-0.225908	Unmethy	-1.92191	Unmethy	-2.57496	Unmethy	-2.33668	Unmethy	-2.49506	Unmethy	-2.88494
cg17184477	15	65147759	SMAD3	NM_005902	Body	S_Shore	Asthma	Methy	1.0593	Margin	0.419977	Margin	-1.2676	Margin	-0.154251	Margin	0.564613	Methy	1.52709	Methy	2.06062	Methy	1.86058	Methy	1.82491	Methy	1.16313
cg05438378	15	65170790	SMAD3	NM_005902	Body	NA	Asthma	Margin	-1.16666	Margin	-0.755918	Margin	-0.102585	Margin	-0.628318	Unmethy	-2.98617	Margin	-0.576935	Unmethy	-2.86599	Margin	-1.49688	Margin	-1.49531	Margin	-1.44933
cg25594736	15	65178201	SMAD3	NM_005902	Body	NA	Asthma	Unmethy	-3.32979	Unmethy	-2.23386	Margin	-1.54021	Margin	-1.29335	Unmethy	-2.19392	Margin	-1.07912	Unmethy	-4.36121	Unmethy	-4.44721	Unmethy	-4.46826	Unmethy	-4.33354
cg19193595	15	65183541	SMAD3	NM_005902	Body	NA	Asthma	Margin	-0.256519	Margin	0.363437	Margin	-0.631527	Margin	0.871639	Methy	1.62344	Methy	1.30027	Margin	-1.12814	Margin	-1.28327	Margin	-1.37111	Unmethy	-1.69302
cg06846320	15	65188805	SMAD3	NM_005902	Body	NA	Asthma	Methy	1.92716	Methy	2.0177	Methy	2.25087	Methy	2.43203	Methy	2.17681	Margin	0.235262	Methy	1.80453	Methy	1.98654	Methy	2.00296	Methy	1.63088
cg01671785	15	65196964	SMAD3	NM_005902	Body	NA	Asthma	Margin	-0.60965	Margin	0.237001	Methy	0.988827	Methy	1.7861	Methy	1.90829	Margin	-0.897357	Unmethy	-2.62289	Margin	-1.83596	Unmethy	-1.87482	Margin	-0.773278
cg07882838	15	65204661	SMAD3;SMAD3	NM_005902;NM_001145102	Body;TSS1500	NA	Asthma	Methy	1.63008	Methy	1.78482	Methy	1.58923	Methy	1.57541	Methy	1.77281	Methy	1.80971	Methy	1.57971	Methy	1.5082	Margin	0.552344	Methy	1.27438
cg00604410	15	65204953	SMAD3;SMAD3	NM_001145102;NM_005902	TSS200;Body	NA	Asthma	Margin	0.875054	Methy	1.41951	Methy	2.20712	Methy	2.62916	Methy	1.95882	Margin	0.659576	Margin	0.36629	Margin	0.518862	Margin	0.607342	Margin	0.406544
cg22528123	15	65205018	SMAD3;SMAD3	NM_001145102;NM_005902	TSS200;Body	NA	Asthma	Methy	2.03867	Methy	2.39711	Methy	3.0402	Methy	3.24508	Methy	3.3355	Margin	0.715934	Methy	1.44038	Methy	2.10458	Methy	2.44935	Methy	2.27138
cg10780949	15	65205370	SMAD3;SMAD3;SMAD3	NM_005902;NM_001145102;NM_001145102	Body;1stExon;5'UTR	NA	Asthma	Margin	-0.509685	Margin	0.532029	Methy	1.41838	Methy	1.46968	Margin	0.755066	Margin	0.596183	Margin	-0.878899	Margin	-1.28364	Margin	-1.15963	Margin	-1.02941
cg03352169	15	65213592	SMAD3;SMAD3	NM_005902;NM_001145102	Body;5'UTR	NA	Asthma	Margin	0.40701	Margin	0.460612	Margin	0.269249	Margin	0.000329654	Margin	-0.407389	Unmethy	-2.00247	Methy	1.19435	Margin	0.457648	Margin	0.842643	Methy	1.12931
cg15723784	15	65228121	SMAD3;SMAD3;SMAD3	NM_005902;NM_001145103;NM_001145102	Body;Body;5'UTR	NA	Asthma	Methy	1.38704	Methy	2.10025	Methy	2.44009	Methy	3.0054	Methy	2.81927	Methy	1.45395	Margin	0.568949	Margin	0.637496	Margin	0.379846	Margin	-0.286733
cg24032190	15	65229947	SMAD3;SMAD3;SMAD3	NM_005902;NM_001145103;NM_001145102	Body;Body;5'UTR	NA	Asthma	Unmethy	-3.34669	Unmethy	-2.7106	Unmethy	-2.73719	Margin	-1.90278	Unmethy	-3.09012	Margin	-0.63218	Unmethy	-3.97981	Unmethy	-3.81688	Unmethy	-4.05821	Unmethy	-4.18069
cg01919034	15	67528873	NA	NA	NA	N_Shelf	RA	Margin	0.542705	Margin	0.668447	Margin	0.708188	Margin	0.347912	Margin	0.673484	Margin	0.552798	Margin	0.40939	Margin	0.559771	Margin	0.791105	Methy	0.863342
cg07513768	15	67531582	RPLP1;RPLP1	NM_213725;NM_001003	TSS1500;TSS1500	N_Shore	RA	Margin	-1.54191	Margin	-1.39457	Margin	-1.34277	Margin	-1.63547	Margin	-1.31992	Margin	-1.54984	Margin	-1.5023	Margin	-1.48244	Unmethy	-1.56766	Unmethy	-1.74086
cg00469015	15	67531738	RPLP1;RPLP1	NM_213725;NM_001003	TSS1500;TSS1500	N_Shore	RA	Margin	-1.53156	Margin	-1.26456	Margin	-1.31173	Margin	-1.3712	Margin	-1.2704	Margin	-1.47524	Margin	-1.51137	Margin	-1.64252	Unmethy	-1.82813	Unmethy	-2.262
cg10716823	15	67531904	RPLP1;RPLP1	NM_213725;NM_001003	TSS1500;TSS1500	N_Shore	RA	Unmethy	-2.27428	Unmethy	-1.9135	Unmethy	-1.71604	Margin	-1.9999	Unmethy	-1.919	Margin	-1.67794	Unmethy	-2.3347	Unmethy	-2.5259	Unmethy	-2.58966	Unmethy	-3.47045
cg17467968	15	75498147	NA	NA	NA	N_Shore	T2D	Methy	1.94475	Methy	1.93144	Methy	2.40463	Methy	2.35405	Methy	1.9282	Margin	0.865165	Methy	1.57546	Methy	1.74281	Methy	1.84419	Methy	1.36514
cg15453836	15	75498561	NA	NA	NA	N_Shore	T2D	Margin	-1.72991	Margin	-1.62624	Margin	-1.42903	Margin	-1.40615	Margin	-1.4729	Margin	-1.65517	Unmethy	-2.17806	Unmethy	-2.13714	Unmethy	-2.07511	Unmethy	-2.23411
cg17270013	15	77023894	CTSH;CTSH	NM_148979;NM_004390	Body;Body	N_Shore	T1D	Methy	1.2297	Methy	1.23142	Methy	1.06115	Methy	1.24606	Methy	1.35815	Margin	-0.199165	Methy	1.15574	Methy	1.52983	Methy	1.43238	Methy	1.55
cg17922215	15	77024200	CTSH;CTSH	NM_148979;NM_004390	Body;Body	Island	T1D	Unmethy	-1.92153	Unmethy	-2.03488	Unmethy	-1.83676	Margin	-1.74037	Margin	-1.82683	Unmethy	-2.58468	Unmethy	-2.30041	Unmethy	-2.17231	Unmethy	-2.15522	Unmethy	-1.99057
cg07448499	15	77024212	CTSH;CTSH	NM_148979;NM_004390	Body;Body	Island	T1D	Unmethy	-1.99571	Unmethy	-1.99672	Unmethy	-2.04177	Margin	-1.9871	Unmethy	-2.02853	Unmethy	-2.79986	Unmethy	-2.20396	Unmethy	-2.01411	Unmethy	-2.15031	Unmethy	-2.09876
cg18738367	15	77025778	CTSH;CTSH	NM_004390;NM_148979	TSS1500;TSS1500	S_Shore	T1D	Unmethy	-2.48988	Unmethy	-2.04142	Unmethy	-1.7341	Unmethy	-2.48107	Unmethy	-2.41379	Margin	-0.976515	Unmethy	-3.22635	Unmethy	-3.19059	Unmethy	-3.13111	Unmethy	-3.09883
cg27474175	15	78151047	ZFAND6	NM_019006	5'UTR	NA	T2D	Methy	1.98789	Methy	2.264	Methy	1.8656	Methy	1.67085	Methy	2.77453	Methy	2.28337	Methy	2.48256	Methy	1.90075	Methy	1.60983	Margin	0.65322
cg18866183	15	78184941	ZFAND6	NM_019006	5'UTR	NA	T2D	Methy	2.51567	Methy	3.04582	Methy	3.16349	Methy	3.06014	Methy	3.15581	Methy	3.30752	Methy	3.0292	Methy	2.35006	Methy	1.79034	Margin	-0.786882
cg27663476	15	78231463	FAH	NM_000137	TSS1500	NA	T2D	Margin	0.545412	Margin	0.886433	Margin	0.837846	Margin	0.707925	Methy	1.21958	Methy	1.34833	Methy	0.72151	Margin	0.194389	Margin	-0.0350146	Unmethy	-1.98389
cg06856840	15	78233506	FAH	NM_000137	Body	NA	T2D	Margin	-0.622998	Margin	0.267224	Methy	1.50472	Methy	1.53485	Margin	0.0024141	Margin	0.581954	Unmethy	-2.21767	Unmethy	-2.22114	Unmethy	-2.74081	Unmethy	-3.08351
cg10379077	16	10984365	CLEC16A	NM_015226	Body	NA	T1D	Methy	1.56782	Methy	1.49756	Methy	1.58375	Margin	0.829439	Margin	0.461972	Margin	0.375081	Methy	2.53964	Methy	1.47071	Methy	1.47168	Methy	1.35025
cg08498465	16	10991710	CLEC16A	NM_015226	Body	NA	T1D	Methy	5.98193	Unmethy	6.45843	Margin	6.06263	Unmethy	5.90744	Margin	5.80705	Methy	6.08119	Methy	5.91646	Methy	5.75612	Methy	5.99897	Methy	5.28617
cg04616529	16	11089487	CLEC16A	NM_015226	Body	NA	T1D	Methy	2.5695	Methy	1.81992	Margin	0.691717	Methy	1.37597	Methy	3.35078	Methy	2.07132	Methy	3.23413	Methy	3.30019	Methy	3.38153	Methy	3.4236
cg03995533	16	11101744	CLEC16A	NM_015226	Body	NA	T1D	Methy	2.07518	Methy	1.43732	Methy	1.05089	Margin	0.566034	Margin	-0.0616457	Methy	1.47514	Methy	3.0056	Methy	2.58008	Methy	2.65795	Methy	2.49817
cg03217729	16	11130391	CLEC16A	NM_015226	Body	NA	T1D	Margin	-1.38773	Margin	-0.876765	Margin	-0.923873	Margin	-0.639631	Margin	-0.559181	Margin	0.466768	Unmethy	-2.51126	Unmethy	-2.16984	Unmethy	-2.19447	Unmethy	-2.56807
cg10297430	16	11179941	CLEC16A	NM_015226	Body	Island	T1D	Methy	6.07455	Methy	5.68994	Margin	5.95972	Unmethy	6.06509	Unmethy	5.98191	Methy	5.71156	Methy	6.04862	Methy	5.69047	Methy	6.02039	Methy	6.03667
cg06150195	16	11183375	CLEC16A	NM_015226	3'UTR	S_Shelf	T1D	Unmethy	-2.92814	Unmethy	-2.00298	Margin	-1.23959	Margin	-0.979231	Unmethy	-2.06567	Unmethy	-2.88136	Unmethy	-3.92643	Unmethy	-3.5333	Unmethy	-3.47539	Unmethy	-3.21635
cg26442107	16	11183961	NA	NA	NA	S_Shelf	T1D	Methy	5.98584	Methy	5.6836	Unmethy	6.27437	Unmethy	6.31935	Unmethy	6.19639	Methy	4.06203	Methy	5.21945	Methy	6.21679	Unmethy	6.48956	Margin	6.22223
cg27326750	16	11274803	PRM3	NM_021247	1stExon	N_Shelf	T1D	Margin	0.43551	Methy	1.11371	Methy	1.46722	Methy	1.47333	Methy	1.23529	Methy	1.82188	Margin	0.0485884	Margin	-0.089775	Margin	0.0781185	Margin	0.543758
cg09967329	16	11277794	PRM2;PRM2	NM_002762;NM_002762	1stExon;5'UTR	S_Shore	T1D	Methy	1.77966	Methy	1.7407	Methy	1.27487	Margin	0.633905	Margin	0.587466	Methy	2.00346	Methy	2.34289	Methy	2.30313	Methy	2.47124	Methy	2.6329
cg01281993	16	11281591	NA	NA	NA	S_Shelf	T1D	Methy	2.28608	Methy	2.16262	Methy	2.11534	Methy	1.4129	Methy	1.23268	Methy	2.73952	Methy	2.64891	Methy	2.38814	Methy	2.03112	Margin	0.500756
cg26840146	16	11291944	NA	NA	NA	NA	T1D	Methy	1.76527	Methy	1.73669	Methy	1.41719	Methy	1.06195	Margin	0.907872	Methy	2.29127	Methy	2.25747	Methy	2.16626	Methy	2.28201	Methy	2.25657
cg06946797	16	11329910	NA	NA	NA	NA	T1D	Margin	-1.16643	Margin	-1.14819	Margin	-0.757128	Margin	-1.14153	Margin	-1.11887	Unmethy	-3.13092	Unmethy	-2.4921	Margin	-1.32608	Margin	-0.929763	Margin	-0.0476234
cg08010037	16	11337876	NA	NA	NA	NA	T1D	Margin	0.637295	Margin	0.735123	Margin	0.723913	Margin	0.541761	Margin	0.555944	Margin	0.660121	Margin	0.509499	Margin	0.649136	Methy	0.941988	Methy	0.946179
cg02021288	16	11343368	NA	NA	NA	N_Shelf	T1D	Methy	1.74414	Methy	1.43498	Methy	1.29335	Margin	-0.253108	Methy	1.39473	Methy	3.06519	Methy	2.54212	Methy	2.37182	Methy	2.47334	Methy	2.70698
cg09582822	16	11345464	C16orf75	NM_152308	TSS1500	N_Shore	T1D	Margin	0.859264	Margin	0.856752	Margin	0.829097	Margin	0.849908	Margin	0.938088	Margin	0.901473	Methy	0.953541	Methy	0.944686	Methy	1.11361	Methy	1.16654
cg02192218	16	28407550	CLN3;CLN3	NM_001042432;NM_000086	Body;Body	N_Shelf	IBD	Methy	2.567	Methy	2.4192	Methy	2.9284	Methy	1.94529	Margin	0.3182	Methy	2.06815	Methy	2.96499	Methy	2.93928	Methy	3.04872	Methy	2.97626
cg03300649	16	28412450	APOB48R;CLN3	NM_018690;NM_001042432	TSS1500;TSS1500	S_Shore	IBD	Margin	0.521018	Margin	0.272264	Margin	-0.554327	Margin	-0.509296	Margin	-0.326909	Methy	1.69302	Methy	0.89689	Methy	0.853802	Margin	0.787756	Margin	0.147494
cg14237301	16	28413978	APOB48R	NM_018690	Body	N_Shelf	IBD	Methy	1.22362	Methy	1.76025	Methy	2.56769	Methy	2.66028	Methy	1.71992	Methy	3.46683	Margin	0.568812	Margin	0.618713	Margin	0.442304	Margin	-0.856032
cg07542864	16	28416948	APOB48R	NM_018690	Body	Island	IBD	Methy	5.97256	Unmethy	6.49852	Unmethy	6.27414	Unmethy	6.25412	Unmethy	6.10007	Methy	6.2134	Methy	6.20767	Methy	6.17067	Unmethy	6.4263	Methy	5.96501
cg26489497	16	28419518	IL27	NM_145659	Body	S_Shelf	T1D,IBD	Margin	0.345552	Margin	0.507251	Methy	1.26435	Methy	1.2601	Margin	0.594103	Margin	0.332692	Margin	-1.27831	Margin	0.137799	Margin	0.0366209	Margin	-0.191777
cg17122311	16	28424779	IL27	NM_145659	Body	NA	T1D,IBD	Margin	0.571667	Methy	1.8715	Methy	3.10969	Methy	3.27109	Methy	3.19477	Methy	2.33721	Margin	0.350605	Margin	-0.409166	Margin	-0.0148226	Methy	1.11322
cg26792089	16	28425701	IL27	NM_145659	TSS200	NA	T1D,IBD	Margin	-0.894385	Margin	-0.442731	Margin	-0.0243986	Margin	0.00362812	Margin	-0.315776	Margin	-0.892296	Unmethy	-2.61709	Margin	-1.82069	Margin	-1.4923	Margin	-0.736625
cg25341726	16	28425832	IL27	NM_145659	TSS200	NA	T1D,IBD	Margin	-0.275419	Margin	0.645249	Methy	1.44667	Methy	1.57162	Margin	0.842084	Margin	0.0864624	Unmethy	-2.35631	Margin	-1.68255	Margin	-1.21599	Margin	-0.333677
cg00201760	16	28425886	IL27	NM_145659	TSS1500	NA	T1D,IBD	Margin	-0.5109	Margin	0.409283	Methy	2.01707	Methy	1.60206	Margin	0.743669	Margin	-0.0448912	Unmethy	-3.10664	Margin	-1.8129	Margin	-1.06431	Margin	0.133241
cg02195680	16	28427067	IL27	NM_145659	TSS1500	NA	T1D,IBD	Margin	-1.38596	Margin	-1.34776	Margin	-0.841328	Margin	-1.13175	Margin	-1.72216	Margin	-1.4668	Margin	-1.41265	Margin	-1.50938	Unmethy	-1.5757	Unmethy	-1.61425
cg27413008	16	28427098	IL27	NM_145659	TSS1500	NA	T1D,IBD	Unmethy	-2.20835	Unmethy	-1.73559	Margin	-1.14909	Margin	-2.03879	Unmethy	-2.87009	Unmethy	-2.38968	Unmethy	-2.25882	Unmethy	-2.72504	Unmethy	-2.74086	Unmethy	-2.51953
cg01803679	16	28457770	NUPR1;NUPR1;NUPR1;NUPR1	NM_001042483;NM_012385;NM_012385;NM_001042483	5'UTR;1stExon;5'UTR;1stExon	NA	T1D,IBD	Margin	0.804821	Margin	0.936547	Methy	1.68051	Methy	1.66545	Methy	1.22685	Methy	1.7151	Margin	0.260365	Margin	0.528391	Margin	0.776915	Methy	1.4106
cg06288570	16	28458068	NUPR1;NUPR1	NM_012385;NM_001042483	TSS200;TSS200	NA	T1D,IBD	Margin	0.615214	Margin	0.604239	Margin	0.622701	Margin	0.182175	Margin	0.189735	Margin	0.406311	Methy	0.854003	Methy	0.706279	Margin	0.829789	Margin	0.80375
cg05302211	16	28472498	CCDC101	NM_138414	TSS1500	N_Shore	IBD	Methy	1.04383	Methy	1.21645	Methy	1.11001	Methy	1.16731	Methy	1.23768	Margin	1.01699	Methy	1.11191	Methy	1.01735	Methy	1.07919	Methy	1.07016
cg08726667	16	28480880	CCDC101	NM_138414	5'UTR	NA	IBD	Methy	1.06009	Methy	1.47992	Methy	2.11055	Methy	2.15189	Methy	1.46164	Methy	1.57608	Margin	0.615489	Margin	0.553253	Margin	0.550208	Margin	-0.168381
cg07866632	16	28492303	CCDC101	NM_138414	5'UTR	NA	IBD	Margin	-0.550336	Margin	0.231519	Methy	1.10657	Methy	1.37719	Margin	0.615491	Margin	-0.104366	Unmethy	-2.90281	Unmethy	-2.25472	Unmethy	-2.82926	Unmethy	-3.11102
cg10407847	16	28515032	SULT1A2;SULT1A2;SULT1A2	NM_177528;NM_177528;NM_001054	1stExon;5'UTR;5'UTR	NA	IBD	Margin	0.770666	Margin	0.914543	Margin	0.918954	Margin	0.871029	Margin	0.920437	Margin	0.949343	Methy	0.886578	Methy	0.725869	Methy	1.1127	Methy	0.930008
cg00931491	16	28515789	SULT1A2;SULT1A2	NM_001054;NM_177528	5'UTR;TSS1500	N_Shelf	IBD	Margin	0.225993	Margin	0.720203	Methy	1.26153	Methy	1.07871	Margin	0.649026	Margin	0.866831	Margin	-0.249075	Margin	-0.0927493	Margin	0.0258161	Margin	0.172957
cg04643524	16	28516721	SULT1A2;SULT1A2	NM_001054;NM_177528	TSS1500;TSS1500	N_Shelf	IBD	Methy	1.45059	Methy	1.70538	Methy	1.70004	Methy	1.10515	Methy	1.29142	Margin	1.00604	Methy	1.0747	Methy	1.3492	Methy	1.25655	Methy	1.22044
cg12743398	16	28517032	SULT1A2	NM_001054	TSS1500	N_Shelf	IBD	Methy	1.40197	Methy	1.60655	Methy	2.17156	Methy	1.88652	Methy	1.82173	Margin	1.11154	Margin	0.62671	Methy	1.06424	Methy	1.06941	Methy	1.30998
cg03761815	16	28521085	NA	NA	NA	S_Shore	IBD	Methy	3.18024	Methy	2.92976	Methy	3.89301	Methy	3.48647	Methy	3.58177	Margin	1.13201	Methy	3.29558	Methy	3.73119	Methy	3.48546	Methy	3.56768
cg27574817	16	28521649	NA	NA	NA	S_Shore	IBD	Methy	1.35029	Methy	1.27504	Methy	1.19376	Methy	1.01748	Methy	1.16893	Margin	0.595948	Methy	0.879042	Methy	1.19045	Methy	1.03449	Methy	1.05878
cg09685060	16	28528787	SULT1A1;SULT1A1;SULT1A1;SULT1A1;SULT1A1;SULT1A1;SULT1A1	NM_177529;NM_177534;NM_001055;NM_177529;NM_177536;NM_177530;NM_001055	5'UTR;TSS1500;5'UTR;1stExon;Body;TSS1500;1stExon	N_Shelf	IBD	Margin	0.0257104	Margin	0.294868	Margin	0.76304	Margin	0.612973	Margin	0.241166	Methy	1.36307	Margin	-0.541751	Margin	-0.404668	Margin	-0.210144	Margin	0.0612447
cg08961793	16	28535619	SULT1A1	NM_177536	Body	S_Shelf	IBD	Margin	-0.47618	Margin	0.498553	Methy	1.14124	Methy	1.23077	Methy	1.23172	Methy	1.21552	Margin	-1.53684	Unmethy	-2.2252	Unmethy	-1.62998	Margin	-0.403282
cg01009486	16	28540487	SULT1A1	NM_177536	Body	N_Shore	IBD	Methy	2.64858	Methy	2.95416	Methy	3.22259	Methy	3.2666	Methy	3.09043	Methy	2.63987	Methy	2.69447	Methy	2.28086	Methy	1.84024	Margin	0.687637
cg00204512	16	28662211	NA	NA	NA	N_Shelf	IBD	Margin	-0.488993	Margin	-0.287419	Margin	0.178083	Margin	0.0379291	Margin	0.0418888	Margin	-0.187313	Unmethy	-2.27731	Margin	-0.742805	Margin	-0.658723	Margin	0.167667
cg06901762	16	28671830	NA	NA	NA	S_Shelf	IBD	Margin	0.73383	Margin	0.709095	Margin	0.86637	Margin	0.605429	Margin	0.941366	Margin	0.618261	Margin	0.54689	Methy	0.831123	Methy	0.922778	Methy	1.00057
cg09736526	16	31178309	ITGAM;ITGAM	NM_001145808;NM_000632	TSS1500;TSS1500	NA	SLE	Methy	1.07412	Methy	1.13805	Methy	1.08353	Margin	0.846777	Methy	1.15992	Methy	1.19875	Methy	0.917074	Methy	0.899873	Methy	1.35874	Methy	1.18563
cg15337006	16	31178510	ITGAM;ITGAM	NM_001145808;NM_000632	TSS1500;TSS1500	NA	SLE	Margin	-0.62783	Margin	0.261864	Methy	1.27015	Methy	1.69213	Margin	0.550209	Margin	0.00143604	Unmethy	-2.38117	Unmethy	-2.09435	Unmethy	-2.12683	Margin	-1.36225
cg22490695	16	31178741	ITGAM;ITGAM	NM_001145808;NM_000632	TSS200;TSS200	NA	SLE	Unmethy	-2.27163	Margin	-1.36609	Margin	-0.667785	Margin	-1.35815	Unmethy	-2.89437	Unmethy	-3.40759	Unmethy	-3.38906	Unmethy	-3.14659	Unmethy	-3.18076	Unmethy	-3.44713
cg00833777	16	31179143	ITGAM;ITGAM	NM_001145808;NM_000632	Body;Body	NA	SLE	Margin	-1.86871	Margin	-1.24518	Margin	-0.381933	Margin	-0.50178	Unmethy	-2.33812	Unmethy	-3.3567	Unmethy	-3.4643	Unmethy	-3.14545	Unmethy	-3.25821	Unmethy	-3.50346
cg05625471	16	31250249	ITGAM;ITGAM	NM_001145808;NM_000632	Body;Body	Island	SLE	Unmethy	-2.30681	Unmethy	-1.88445	Unmethy	-2.61416	Unmethy	-2.11877	Margin	-1.29299	Unmethy	-2.54369	Unmethy	-2.51249	Unmethy	-2.31525	Unmethy	-2.32303	Unmethy	-2.29335
cg02256631	16	31250453	ITGAM;ITGAM	NM_001145808;NM_000632	Body;Body	Island	SLE	Unmethy	-2.58418	Unmethy	-2.24595	Unmethy	-3.11172	Margin	-1.73245	Margin	-0.356625	Unmethy	-3.30597	Unmethy	-3.07998	Unmethy	-3.14725	Unmethy	-3.08655	Unmethy	-2.88152
cg15817542	16	31250557	ITGAM;ITGAM	NM_001145808;NM_000632	3'UTR;3'UTR	Island	SLE	Margin	-1.44016	Margin	-0.978617	Margin	-0.751246	Margin	-0.862525	Margin	-0.441301	Margin	-1.36922	Unmethy	-1.96115	Margin	-1.88013	Unmethy	-1.97073	Unmethy	-1.78857
cg03575939	16	31252778	NA	NA	NA	S_Shelf	SLE	Unmethy	-2.55274	Unmethy	-2.10338	Unmethy	-1.73173	Margin	-2.00331	Unmethy	-2.4282	Unmethy	-2.51018	Unmethy	-3.10811	Unmethy	-3.2508	Unmethy	-3.28655	Unmethy	-3.38668
cg05644767	16	31273619	ITGAX	NM_000887	TSS1500	NA	SLE	Margin	-0.03705	Margin	0.00468438	Methy	1.05133	Margin	-0.643955	Unmethy	-2.4794	Margin	-0.221087	Margin	-0.408491	Margin	-0.0124895	Margin	0.0913062	Margin	0.179872
cg11884546	16	31273878	ITGAX	NM_000887	TSS200	NA	SLE	Unmethy	-2.77266	Unmethy	-2.30764	Margin	-1.57829	Unmethy	-2.75008	Unmethy	-3.51548	Unmethy	-2.53049	Unmethy	-3.4401	Unmethy	-3.66758	Unmethy	-3.58479	Unmethy	-3.49293
cg01888869	16	31273919	ITGAX	NM_000887	TSS200	NA	SLE	Unmethy	-3.19231	Unmethy	-2.2461	Margin	-1.27169	Unmethy	-3.21644	Unmethy	-4.5107	Margin	-1.52729	Unmethy	-4.2589	Unmethy	-4.44317	Unmethy	-4.34318	Unmethy	-4.35149
cg04742550	16	31273930	ITGAX	NM_000887	TSS200	NA	SLE	Unmethy	-3.53102	Unmethy	-2.08151	Margin	-0.375308	Unmethy	-2.94015	Unmethy	-5.43686	Margin	-1.2212	Unmethy	-5.63426	Unmethy	-5.62825	Unmethy	-5.79114	Unmethy	-6.16353
cg26233914	16	31274037	ITGAX;ITGAX	NM_000887;NM_000887	1stExon;5'UTR	NA	SLE	Unmethy	-2.56001	Unmethy	-1.76141	Margin	-1.00423	Margin	-1.63337	Unmethy	-3.53019	Unmethy	-1.86135	Unmethy	-3.68755	Unmethy	-3.57042	Unmethy	-3.58846	Unmethy	-3.59199
cg01486260	16	31287351	ITGAX	NM_000887	Body	N_Shelf	SLE	Methy	1.15251	Methy	1.56958	Methy	1.78978	Methy	2.02639	Methy	1.75442	Methy	1.65147	Methy	0.71401	Margin	0.656578	Margin	0.739154	Margin	0.530245
cg02311374	16	31290637	ITGAX	NM_000887	Body	Island	SLE	Methy	5.61331	Unmethy	6.15972	Margin	6.08948	Unmethy	6.02227	Unmethy	6.17874	Methy	6.08974	Methy	5.86395	Methy	5.12588	Methy	5.30521	Methy	6.02217
cg16771652	16	49287886	NOD2	NM_022162	TSS1500	NA	IBD	Margin	-1.24068	Margin	-0.510602	Margin	-1.09371	Margin	0.0833369	Margin	0.792224	Margin	0.367086	Unmethy	-2.0476	Unmethy	-2.4661	Unmethy	-2.3167	Unmethy	-2.16528
cg08554257	16	49288238	NOD2	NM_022162	TSS1500	NA	IBD	Unmethy	-2.75019	Unmethy	-1.9493	Margin	-1.01598	Margin	-0.863909	Unmethy	-3.20094	Margin	-0.663998	Unmethy	-4.17239	Unmethy	-4.4229	Unmethy	-4.5386	Unmethy	-4.66771
cg26954174	16	49288314	NOD2	NM_022162	TSS1500	NA	IBD	Margin	-1.45694	Margin	-0.572692	Margin	-0.18136	Margin	-0.175001	Unmethy	-2.21968	Methy	1.26237	Unmethy	-2.87405	Unmethy	-3.18293	Unmethy	-3.21032	Unmethy	-3.19749
cg18177814	16	49288382	NOD2	NM_022162	TSS200	NA	IBD	Margin	-0.147757	Margin	-0.00518525	Margin	0.288415	Margin	0.228264	Margin	-1.25987	Margin	1.09257	Unmethy	-1.90466	Margin	-0.290965	Margin	-0.196876	Margin	-0.425641
cg01020263	16	49289574	NOD2	NM_022162	Body	NA	IBD	Unmethy	-2.09201	Unmethy	-1.89092	Margin	-1.58576	Margin	-1.85616	Unmethy	-2.58537	Unmethy	-2.78497	Unmethy	-2.52852	Unmethy	-2.15572	Unmethy	-2.06535	Unmethy	-2.37299
cg01243823	16	49289713	NOD2	NM_022162	Body	NA	IBD	Margin	-0.585479	Margin	-0.653068	Margin	-0.564915	Margin	-0.859777	Unmethy	-2.33898	Margin	-1.25125	Margin	-0.634221	Margin	-0.766434	Margin	-0.603346	Margin	-1.02001
cg04172533	16	49300528	NOD2	NM_022162	Body	NA	IBD	Margin	-0.753582	Margin	-0.0129943	Margin	0.186919	Methy	1.94428	Methy	1.34773	Margin	0.0798887	Unmethy	-2.51864	Unmethy	-2.16001	Unmethy	-2.40084	Unmethy	-3.2482
cg05261686	16	49300797	NOD2	NM_022162	Body	NA	IBD	Margin	-0.742272	Margin	0.513326	Methy	1.24789	Methy	2.14912	Methy	1.69277	Margin	-1.61943	Unmethy	-2.61581	Unmethy	-2.09652	Unmethy	-2.28953	Unmethy	-2.60729
cg01068906	16	49303445	NOD2	NM_022162	Body	NA	IBD	Margin	0.809702	Methy	1.78729	Methy	2.77645	Methy	3.14372	Methy	2.74321	Methy	3.1398	Methy	1.03212	Margin	0.542524	Margin	0.727602	Methy	1.55781
cg01981760	16	52295077	FTO;RPGRIP1L;RPGRIP1L	NM_001080432;NM_001127897;NM_015272	TSS1500;5'UTR;5'UTR	N_Shore	T2D	Unmethy	-2.05638	Unmethy	-1.72942	Margin	-1.46671	Margin	-1.36713	Margin	-1.80004	Unmethy	-2.23701	Unmethy	-2.57583	Unmethy	-2.54661	Unmethy	-2.45698	Unmethy	-2.4292
cg00625110	16	52299232	FTO	NM_001080432	Body	S_Shelf	T2D	Margin	-0.263963	Methy	1.01107	Methy	1.98798	Methy	2.65925	Methy	1.849	Margin	-0.8242	Unmethy	-2.94079	Unmethy	-2.24064	Unmethy	-1.89035	Margin	-0.67908
cg26982104	16	52336836	FTO	NM_001080432	Body	NA	T2D	Margin	-0.894182	Margin	-0.0394672	Margin	0.544204	Methy	1.16215	Margin	0.614867	Margin	0.446168	Unmethy	-2.30116	Unmethy	-2.45132	Unmethy	-2.50475	Unmethy	-2.60463
cg01986630	16	52503764	FTO	NM_001080432	Body	NA	T2D	Margin	-1.54055	Margin	-1.12793	Margin	-1.40508	Unmethy	-2.74842	Unmethy	-2.52287	Margin	-0.378656	Margin	-0.0232625	Margin	-1.90712	Unmethy	-1.95042	Unmethy	-3.35879
cg26580413	16	52582849	FTO	NM_001080432	Body	NA	T2D	Margin	-0.675304	Margin	-0.0645748	Margin	0.690013	Margin	0.628066	Margin	0.247278	Margin	0.09216	Margin	-1.34079	Margin	-1.56412	Unmethy	-1.61969	Margin	-1.42575
cg10227678	16	52653841	FTO	NM_001080432	Body	NA	T2D	Methy	1.62246	Margin	0.981379	Margin	0.167381	Margin	-0.175682	Margin	0.931542	Methy	2.76402	Methy	2.88841	Methy	2.26326	Methy	2.3661	Methy	1.94495
cg26963795	17	2152965	SRR;SMG6;SMG6	NM_021947;NM_001170957;NM_017575	TSS1500;5'UTR;Body	N_Shore	T2D	Margin	-1.8492	Margin	-1.66922	Unmethy	-1.66679	Margin	-1.91226	Unmethy	-2.04738	Margin	-1.73716	Margin	-1.55733	Margin	-1.70608	Unmethy	-1.76339	Unmethy	-1.96459
cg03959986	17	2153986	SMG6;SMG6;SRR	NM_001170957;NM_017575;NM_021947	TSS1500;TSS200;TSS200	Island	T2D	Margin	-1.73448	Margin	-1.63161	Margin	-1.39935	Margin	-1.32895	Margin	-1.12771	Margin	-1.6436	Margin	-1.2184	Margin	-1.85094	Unmethy	-4.53558	Unmethy	-2.16767
cg22556056	17	2174753	TSR1;SRR	NM_018128;NM_021947	Body;3'UTR	NA	T2D	Methy	2.92631	Methy	2.42602	Methy	2.64315	Margin	0.641108	Methy	3.21545	Methy	3.50388	Methy	3.31135	Methy	3.0162	Methy	3.10245	Methy	2.96778
cg14694075	17	33133943	HNF1B;HNF1B	NM_000458;NM_001165923	Body;Body	NA	T2D	Methy	1.16271	Methy	1.1576	Methy	1.21894	Margin	0.666323	Margin	0.597057	Methy	1.30389	Methy	1.20772	Methy	1.32856	Methy	1.36722	Methy	1.29328
cg03348978	17	33177343	HNF1B;HNF1B	NM_000458;NM_001165923	Body;Body	Island	T2D	Unmethy	-2.2315	Unmethy	-2.48603	Unmethy	-2.32167	Margin	-1.81598	Unmethy	-2.18854	Unmethy	-2.25763	Unmethy	-2.06765	Unmethy	-2.35366	Unmethy	-2.28911	Unmethy	-2.38262
cg26925669	17	35164855	NA	NA	NA	S_Shore	Asthma,RA	Unmethy	-2.05778	Unmethy	-2.71393	Unmethy	-2.96726	Unmethy	-4.19034	Unmethy	-3.804	Unmethy	-3.67541	Unmethy	-2.03259	Margin	-1.82699	Unmethy	-1.90797	Unmethy	-1.96919
cg08441850	17	35210428	IKZF3;IKZF3;IKZF3;IKZF3;IKZF3;IKZF3	NM_183228;NM_183229;NM_012481;NM_183230;NM_183231;NM_183232	Body;Body;Body;Body;Body;Body	NA	Asthma,RA	Margin	0.621585	Margin	-0.217918	Unmethy	-1.70772	Unmethy	-2.5935	Margin	-1.42944	Unmethy	-2.33695	Methy	1.16931	Methy	1.31399	Methy	1.21411	Methy	1.2637
cg03293732	17	35271340	IKZF3;IKZF3;IKZF3;IKZF3;IKZF3;IKZF3	NM_183228;NM_183229;NM_012481;NM_183230;NM_183231;NM_183232	Body;Body;Body;Body;Body;Body	N_Shelf	Asthma,RA	Methy	1.89593	Methy	1.08975	Margin	0.64678	Margin	-1.58592	Margin	-0.0381173	Margin	0.0934422	Methy	3.616	Methy	3.17889	Methy	2.83043	Methy	1.90282
cg13878456	17	35273870	IKZF3;IKZF3;IKZF3;IKZF3;IKZF3;IKZF3	NM_183228;NM_183229;NM_012481;NM_183230;NM_183231;NM_183232	Body;Body;Body;Body;Body;Body	N_Shore	Asthma,RA	Margin	-1.8923	Unmethy	-2.24004	Unmethy	-2.57537	Unmethy	-3.00726	Unmethy	-2.60176	Unmethy	-2.77463	Margin	-1.53669	Margin	-1.57354	Unmethy	-1.68076	Unmethy	-2.18264
cg00716716	17	35275177	IKZF3;IKZF3;IKZF3;IKZF3;IKZF3;IKZF3	NM_183228;NM_183229;NM_183231;NM_012481;NM_183232;NM_183230	TSS1500;TSS1500;TSS1500;TSS1500;TSS1500;TSS1500	S_Shore	Asthma,RA	Margin	-1.81055	Margin	-1.48514	Margin	-0.62179	Margin	-1.88158	Unmethy	-2.06	Unmethy	-3.03423	Unmethy	-2.37441	Unmethy	-2.22881	Unmethy	-2.13883	Unmethy	-2.6048
cg15636887	17	35277006	ZPBP2;ZPBP2	NM_199321;NM_198844	TSS1500;TSS1500	N_Shore	Asthma,RA	Methy	2.03135	Methy	1.10285	Margin	-0.0308556	Margin	-0.591759	Margin	0.279725	Margin	-0.0143651	Methy	3.29388	Methy	3.27998	Methy	3.42058	Methy	3.58407
cg14585353	17	35277205	ZPBP2;ZPBP2	NM_199321;NM_198844	TSS1500;TSS1500	N_Shore	Asthma,RA	Methy	1.94894	Methy	1.48296	Margin	0.724063	Margin	0.419153	Margin	0.729875	Margin	0.844797	Methy	2.59111	Methy	2.33101	Methy	2.71014	Methy	2.65899
cg16810031	17	35277672	ZPBP2;ZPBP2	NM_199321;NM_198844	TSS1500;TSS1500	Island	Asthma,RA	Margin	0.766759	Margin	0.0777864	Margin	-1.01526	Margin	-0.733569	Margin	-0.0582973	Margin	-1.29649	Methy	1.4905	Methy	1.63542	Methy	1.43135	Methy	1.60798
cg05725940	17	35328451	GSDMB;GSDMB;GSDMB;GSDMB	NM_018530;NM_001042471;NM_001165959;NM_001165958	TSS1500;TSS200;TSS200;TSS200	NA	Asthma,RA,T1D	Margin	0.0832845	Margin	0.0367028	Margin	-0.755819	Margin	-0.965019	Margin	-0.297632	Margin	0.215511	Methy	0.95522	Margin	0.621249	Margin	0.821323	Methy	1.1857
cg12655416	17	35331396	ORMDL3	NM_139280	3'UTR	NA	Asthma,T1D	Margin	-1.2841	Margin	-0.585521	Margin	-0.213498	Margin	-1.26421	Margin	-0.706283	Margin	0.0686652	Margin	-1.79292	Unmethy	-2.81908	Unmethy	-3.06888	Unmethy	-3.55441
cg22144450	17	35333904	ORMDL3	NM_139280	Body	N_Shelf	Asthma,T1D	Methy	1.22275	Methy	1.31416	Methy	1.57699	Margin	-0.199837	Margin	0.850899	Methy	2.5451	Methy	2.12081	Methy	1.34155	Methy	1.37716	Margin	0.857215
cg18711369	17	35334712	ORMDL3	NM_139280	5'UTR	N_Shelf	Asthma,T1D	Methy	2.17964	Methy	1.83842	Methy	1.5212	Margin	-0.0548388	Methy	1.32073	Methy	2.92674	Methy	3.03144	Methy	2.35054	Methy	2.30848	Methy	2.3588
cg10909506	17	35335521	ORMDL3	NM_139280	5'UTR	N_Shore	Asthma,T1D	Methy	1.9933	Methy	1.57104	Margin	0.584406	Margin	-0.011685	Methy	1.71463	Methy	3.81342	Methy	2.97458	Methy	2.60998	Methy	2.52186	Methy	1.89372
cg19511844	17	35337645	ORMDL3	NM_139280	TSS1500	S_Shore	Asthma,T1D	Unmethy	-1.96711	Unmethy	-1.91539	Unmethy	-1.76596	Margin	-1.61149	Margin	-1.56448	Unmethy	-1.8607	Unmethy	-2.4699	Unmethy	-2.40127	Unmethy	-2.4505	Unmethy	-2.39127
cg04308185	17	35337903	ORMDL3	NM_139280	TSS1500	S_Shore	Asthma,T1D	Margin	0.459866	Margin	0.85118	Methy	1.18862	Methy	1.3078	Methy	1.22433	Margin	0.829217	Margin	0.564896	Margin	0.325751	Margin	0.31833	Margin	0.290545
cg13200575	17	35350097	NA	NA	NA	NA	Asthma	Methy	2.22019	Methy	1.77663	Margin	0.95426	Methy	0.937722	Methy	2.0106	Margin	0.472619	Methy	2.88938	Methy	2.92271	Methy	2.93378	Methy	2.90989
cg24910161	17	35372724	GSDMA	NM_178171	TSS200	NA	Asthma	Margin	0.536511	Margin	0.274444	Margin	-0.956514	Margin	-0.930409	Margin	0.562069	Margin	0.878335	Methy	1.25114	Methy	1.01439	Methy	1.23975	Methy	1.23606
cg26162295	17	35372733	GSDMA	NM_178171	TSS200	NA	Asthma	Margin	0.665255	Margin	0.304754	Margin	-0.998468	Margin	-0.805568	Margin	0.692848	Margin	1.01056	Methy	1.45278	Methy	1.28938	Methy	1.4225	Methy	1.37688
cg20404260	18	2907509	LPIN2	NM_014646	3'UTR	NA	T2D	Margin	0.0059391	Margin	0.679025	Methy	1.65021	Methy	2.34034	Methy	1.80496	Margin	-1.45919	Margin	-0.827671	Margin	-0.658143	Margin	-0.608936	Margin	-0.543615
cg15052335	18	3001810	LPIN2;LPIN2	NM_014646;NM_014646	5'UTR;1stExon	N_Shore	T2D	Methy	1.85655	Methy	1.42244	Methy	1.45427	Margin	0.35216	Margin	-1.43865	Methy	2.87525	Methy	2.74395	Methy	2.47831	Methy	2.44469	Methy	2.00619
cg16857548	18	3001965	LPIN2	NM_014646	TSS200	N_Shore	T2D	Margin	0.636723	Margin	0.71237	Margin	0.460428	Margin	0.889527	Margin	0.271166	Methy	1.8402	Methy	1.23714	Margin	0.627767	Margin	0.448555	Margin	-0.0403642
cg12052497	18	3001980	LPIN2	NM_014646	TSS200	N_Shore	T2D	Margin	0.869124	Methy	1.17601	Margin	0.924758	Methy	1.20877	Margin	0.593108	Methy	1.8654	Methy	1.39421	Methy	0.768883	Margin	0.624218	Margin	0.150261
cg10904070	18	3002017	LPIN2	NM_014646	TSS200	N_Shore	T2D	Margin	0.0256358	Methy	1.13905	Methy	1.24245	Methy	1.46369	Margin	0.888234	Methy	2.2079	Methy	1.04225	Margin	-0.885942	Margin	-1.24199	Unmethy	-2.63091
cg25461300	18	3005372	NA	NA	NA	S_Shelf	T2D	Margin	-1.40099	Margin	-0.97257	Margin	-0.995337	Margin	-0.349963	Margin	-0.331225	Margin	-0.654992	Unmethy	-3.22748	Unmethy	-2.97356	Unmethy	-3.08526	Unmethy	-3.2878
cg14113931	18	12691670	CEP76;PSMG2	NM_024899;NM_020232	Body;TSS1500	N_Shore	T1D	Methy	1.76947	Methy	1.43876	Margin	0.649258	Methy	1.63256	Methy	1.99148	Methy	2.82126	Methy	2.22924	Methy	2.07272	Methy	1.83986	Methy	1.28971
cg24210426	18	12770803	NA	NA	NA	S_Shelf	T1D	Margin	0.555565	Margin	0.652685	Margin	0.671542	Margin	0.324905	Margin	0.553211	Margin	0.620651	Margin	0.455366	Margin	0.470015	Margin	0.753214	Methy	0.900116
cg13431464	18	12870767	PTPN2;PTPN2;PTPN2	NM_002828;NM_080422;NM_080423	Body;Body;Body	N_Shelf	T1D	Margin	-1.84724	Margin	-1.11343	Margin	-0.656772	Margin	-0.465438	Margin	-1.0051	Unmethy	-2.45542	Unmethy	-3.41744	Unmethy	-2.95638	Unmethy	-3.49082	Unmethy	-3.71118
cg15873449	18	12875569	PTPN2;PTPN2;PTPN2	NM_080423;NM_002828;NM_080422	TSS1500;TSS1500;TSS1500	S_Shore	T1D	Methy	2.32744	Methy	2.05938	Methy	1.7001	Methy	3.01864	Methy	3.07332	Margin	0.819203	Methy	3.39964	Methy	3.14787	Methy	3.05224	Methy	3.28116
cg12032103	18	65761391	CD226	NM_006566	Body	NA	T1D	Methy	2.51009	Methy	2.25522	Methy	2.18428	Methy	1.09693	Margin	0.959019	Methy	3.05502	Methy	3.02307	Methy	2.85118	Methy	2.88233	Methy	3.04922
cg13164537	18	65775051	CD226;CD226	NM_006566;NM_006566	5'UTR;1stExon	NA	T1D	Margin	0.366732	Margin	-0.0920082	Unmethy	-2.23074	Margin	0.134622	Margin	0.44621	Margin	0.390988	Margin	0.149538	Margin	0.670454	Margin	0.53353	Margin	0.615323
[truncated: 120 more rows]
